# Supplementary material for: The Cytochrome P450 Monooxygenase Inventory of Grapevine (Vitis vinifera L.): Genome-Wide Identification, Evolutionary Characterization and Expression Analysis
Source: Front Genet. 2020 Feb 18;11:44. doi: 10.3389/fgene.2020.00044 (PMC7040366; doi:10.3389/fgene.2020.00044)
Supplement: Supplementary file 3 [file Table_3.xlsx]

## Sheet: Sheet1
Table S3. Motif distribution of each VvCYP genes in grapevine.
Clan	Family	Gene name	motif1	motif2	motif3	motif4	motif5	motif6	motif7	motif8	motif9	motif10	motif11	motif12	motif13	motif14	motif15
51	51	VvCYP51G1a	1	1	0	0	1	0	0	0	0	0	0	0	0	0	0
51	51	VvCYP51G1b	1	0	0	1	1	0	0	0	0	0	0	0	0	0	0
71	701	VvCYP701A3	0	1	1	1	0	0	0	0	0	0	1	0	0	0	0
71	703	VvCYP703A2	1	1	1	1	1	1	1	1	1	1	1	1	1	1	1
71	705	VvCYP705A2	1	1	1	1	1	1	1	1	1	1	1	1	1	0	0
71	705	VvCYP705A3a	1	1	1	1	1	1	1	1	1	1	1	1	1	1	1
71	705	VvCYP705A3b	1	1	1	1	1	1	1	1	1	1	0	1	0	1	1
71	71	VvCYP71B10a	1	1	1	1	1	1	1	1	1	0	1	1	1	0	1
71	71	VvCYP71B10b	1	1	1	1	1	1	1	1	1	1	1	1	1	0	1
71	71	VvCYP71B10c	1	1	1	1	1	1	1	1	1	1	1	1	1	0	1
71	71	VvCYP71B10d	1	1	1	1	1	1	1	1	0	1	1	1	1	0	1
71	71	VvCYP71B10e	1	1	1	1	1	1	1	1	1	1	1	1	1	0	1
71	71	VvCYP71B24a	1	1	1	1	1	1	1	1	1	1	1	1	1	0	0
71	71	VvCYP71A14a	1	1	1	1	1	1	1	1	1	1	1	1	1	0	1
71	71	VvCYP71A25	1	1	1	1	0	1	1	0	0	0	1	1	0	0	0
71	71	VvCYP71A22	1	1	1	1	1	1	1	1	1	1	1	1	1	1	1
71	71	VvCYP71B4	1	1	1	1	1	1	1	1	1	1	1	1	1	0	1
71	71	VvCYP71B24b	1	1	1	1	1	1	1	1	0	1	1	1	1	0	1
71	71	VvCYP71B24c	1	1	1	1	1	1	1	1	1	1	1	1	1	0	1
71	71	VvCYP71B3a	1	1	1	1	1	1	1	1	1	1	1	1	1	0	1
71	71	VvCYP71B23	1	1	1	1	1	1	1	1	1	1	1	1	1	0	0
71	71	VvCYP71A14b	1	1	1	1	1	1	1	0	1	0	1	0	1	1	0
71	71	VvCYP71A23	1	1	1	1	1	1	1	1	1	1	1	1	1	0	0
71	71	VvCYP71B10g	1	1	1	1	1	1	1	1	1	1	1	1	0	0	0
71	71	VvCYP71B31	1	1	1	1	1	1	1	1	0	1	1	1	1	1	0
71	71	VvCYP71B3b	1	1	1	1	1	1	1	1	1	1	1	1	1	0	0
71	71	VvCYP71B3c	1	1	1	1	1	1	1	1	1	1	1	1	1	1	1
71	71	VvCYP71B10h	1	1	1	1	1	1	1	1	1	1	1	1	1	0	0
71	71	VvCYP71B20	1	1	1	1	0	1	1	1	0	0	0	1	0	0	1
71	71	VvCYP71B10i	1	1	1	1	1	1	1	1	1	1	1	1	1	0	1
71	71	VvCYP71B10j	1	1	1	1	1	1	1	1	1	1	1	1	1	0	1
71	71	VvCYP71B10k	1	1	1	1	1	1	1	1	1	1	1	1	1	0	1
71	712	VvCYP712A1a	1	1	1	1	1	1	1	1	1	1	1	1	1	1	0
71	73	VvCYP73A5a	1	1	1	1	1	1	1	1	1	0	0	0	0	0	0
71	73	VvCYP73A5b	1	1	1	1	1	1	1	1	1	1	0	0	0	0	0
71	73	VvCYP73A5c	1	1	1	1	0	1	1	1	1	0	0	0	0	0	0
71	75	VvCYP75B1a	1	1	1	1	1	1	1	1	1	1	1	1	1	1	0
71	75	VvCYP75B1b	1	1	1	1	0	1	1	0	0	0	1	1	1	1	1
71	76	VvCYP76C1a	1	1	1	1	1	1	1	1	1	1	1	1	1	1	0
71	76	VvCYP76C1b	1	1	1	1	1	1	1	0	1	1	1	1	1	1	0
71	76	VvCYP76C1d	1	1	1	1	0	1	1	0	0	1	1	1	1	1	0
71	76	VvCYP76C1e	1	1	1	1	1	1	1	1	1	1	1	0	1	1	0
71	76	VvCYP76C1f	1	1	1	1	1	1	1	1	1	1	1	1	1	1	0
71	76	VvCYP76C1g	1	1	1	1	0	1	1	0	0	0	1	0	1	1	0
71	76	VvCYP76C1h	1	1	1	1	0	1	1	0	0	0	1	1	1	1	0
71	76	VvCYP76C1i	1	1	1	1	1	1	1	1	0	1	1	1	1	1	0
71	76	VvCYP76C1l	1	1	1	1	1	1	1	1	1	1	1	1	1	1	0
71	76	VvCYP76C4b	1	1	1	1	1	1	1	1	1	1	1	1	1	1	0
71	76	VvCYP76C4c	1	1	1	1	1	1	1	1	1	1	1	1	1	1	0
71	76	VvCYP76C4d	1	1	1	1	1	1	1	0	1	1	1	0	1	1	0
71	76	VvCYP76C4e	1	1	1	1	1	1	1	0	1	1	1	1	1	1	0
71	76	VvCYP76C5c	1	1	1	1	1	1	1	1	0	1	1	1	1	1	0
71	76	VvCYP76C2a	1	1	1	1	1	1	1	1	0	1	1	1	1	1	0
71	77	VvCYP77B1	1	1	1	1	1	0	1	0	0	0	1	0	1	0	0
71	77	VvCYP77A4	1	1	1	1	1	1	1	1	0	0	1	0	1	0	0
71	78	VvCYP78A5	1	1	1	1	0	1	1	1	0	0	0	1	1	0	0
71	78	VvCYP78A10a	1	1	1	0	0	1	1	1	0	0	0	1	1	0	0
71	78	VvCYP78A6	1	1	1	0	0	1	1	1	0	0	0	1	1	0	0
71	78	VvCYP78A7a	1	1	1	1	0	1	0	1	0	0	0	1	1	0	0
71	78	VvCYP78A10b	1	1	1	1	0	1	1	1	0	0	1	1	1	0	0
71	78	VvCYP78A10c	1	1	1	1	0	0	1	1	0	0	0	0	1	0	0
71	78	VvCYP78A7b	1	1	1	1	0	0	0	1	0	0	0	1	1	0	0
71	79	VvCYP79A2a	1	1	1	1	1	1	1	0	0	1	1	1	0	1	0
71	79	VvCYP79A2b	0	1	1	1	1	1	1	0	0	1	0	1	0	1	0
71	79	VvCYP79A2e	1	1	1	0	1	1	1	1	0	1	1	0	0	1	1
71	79	VvCYP79A2f	1	1	1	0	1	1	1	0	0	1	1	1	0	1	1
71	79	VvCYP79A2g	1	1	1	1	1	1	1	0	0	0	1	1	0	1	1
71	79	VvCYP79A2h	1	1	1	0	1	1	1	0	0	1	1	1	0	1	1
71	79	VvCYP79A2i	1	1	1	1	1	1	1	0	0	1	1	1	0	1	0
71	81	VvCYP81D1a	1	1	1	1	0	1	1	0	0	0	1	0	1	1	1
71	81	VvCYP81D1b	1	1	1	1	1	1	1	1	1	1	1	0	1	1	1
71	81	VvCYP81D1d	1	1	1	1	1	1	1	1	1	1	1	0	1	1	1
71	81	VvCYP81D1e	1	1	1	1	1	1	1	1	1	1	1	0	1	1	1
71	81	VvCYP81D1f	1	1	1	1	1	1	1	1	1	1	1	0	1	0	1
71	81	VvCYP81D4b	1	1	1	1	1	1	1	1	1	1	1	0	1	1	1
71	81	VvCYP81D1h	1	1	1	1	0	1	1	0	0	0	1	0	1	1	1
71	81	VvCYP81D1i	1	1	1	1	1	1	1	1	1	1	1	0	1	0	1
71	81	VvCYP81D1j	1	1	1	1	0	1	1	0	0	0	1	0	1	0	0
71	81	VvCYP81D2a	1	1	1	1	1	1	1	1	1	1	1	1	1	1	1
71	81	VvCYP81D3a	1	1	1	1	1	1	1	1	1	1	1	0	1	1	1
71	81	VvCYP81H1	1	1	0	1	0	1	1	1	1	1	1	0	1	1	1
71	81	VvCYP81D2b	1	1	1	1	1	1	1	1	1	1	1	1	1	1	1
71	81	VvCYP81D3b	0	1	1	1	0	1	1	1	0	1	1	1	1	1	1
71	81	VvCYP81D5	1	1	1	1	1	1	1	1	1	1	1	0	1	1	1
71	81	VvCYP81D1l	1	1	1	1	1	1	1	1	1	1	1	0	1	1	1
71	81	VvCYP81D4c	1	1	1	1	0	1	0	1	0	0	0	1	1	0	0
71	81	VvCYP81D2c	1	1	1	1	1	1	1	1	1	1	1	0	1	1	1
71	81	VvCYP81D8	1	1	1	1	0	1	1	1	1	1	1	0	1	1	1
71	81	VvCYP81D4d	1	1	1	1	1	1	1	1	1	1	1	0	1	0	1
71	82	VvCYP82C4a	1	1	1	1	0	1	1	0	0	0	1	1	1	0	0
71	82	VvCYP82C3b	1	1	1	1	1	1	1	1	1	1	1	1	1	0	1
71	82	VvCYP82C2b	1	1	1	1	1	1	1	1	1	1	1	1	1	1	0
71	82	VvCYP82C2c	0	1	1	1	1	1	1	1	1	1	1	1	1	1	1
71	82	VvCYP82C2d	1	1	1	1	0	1	1	0	0	0	1	1	1	1	1
71	82	VvCYP82C2e	1	1	1	1	1	1	1	1	1	1	1	1	1	1	1
71	82	VvCYP82C2f	1	1	1	1	1	1	1	1	1	1	1	1	1	1	0
71	82	VvCYP82C3c	1	1	1	1	1	1	1	1	1	1	1	1	1	1	1
71	82	VvCYP82C4b	1	1	1	1	1	1	1	1	1	1	1	1	1	1	1
71	82	VvCYP82C4c	1	1	1	1	1	1	1	1	1	1	1	1	1	1	1
71	82	VvCYP82C3d	1	1	1	1	1	1	1	1	1	1	1	1	1	1	1
71	82	VvCYP82C2k	1	1	1	1	1	1	0	1	1	1	1	1	1	1	1
71	82	VvCYP82C4d	1	1	1	1	1	1	1	1	1	1	1	1	1	1	1
71	82	VvCYP82C2l	1	1	1	1	1	1	1	1	1	1	0	1	0	1	1
71	82	VvCYP82C2m	1	1	1	1	1	1	1	1	1	1	1	1	1	1	1
71	82	VvCYP82C2o	1	1	1	1	1	1	1	1	1	1	0	1	1	1	1
71	82	VvCYP82C4e	1	1	1	1	1	1	1	1	1	1	1	1	1	1	1
71	83	VvCYP83B1	1	1	1	1	1	1	1	1	1	1	1	1	1	1	1
71	84	VvCYP84A1a	1	1	1	1	1	1	1	1	0	1	1	1	1	0	0
71	84	VvCYP84A1b	1	1	1	1	1	1	1	1	0	1	1	1	1	0	0
71	84	VvCYP84A1c	1	1	1	1	1	1	1	1	1	1	1	1	1	1	1
71	89	VvCYP89A5	0	1	1	1	1	1	1	1	1	1	0	0	0	0	0
71	89	VvCYP89A2a	1	1	1	1	1	1	0	1	0	0	1	0	0	0	0
71	89	VvCYP89A2b	1	1	1	1	1	1	1	1	1	0	1	0	0	0	0
71	89	VvCYP89A2c	1	1	1	1	1	1	1	1	1	1	1	0	0	0	0
71	89	VvCYP89A2d	1	1	1	0	1	1	1	1	1	1	0	0	1	0	0
71	89	VvCYP89A2e	1	1	1	1	1	1	1	1	0	1	1	0	1	0	0
71	89	VvCYP89A2f	1	1	1	1	1	1	1	1	1	1	1	0	1	0	0
71	89	VvCYP89A2g	1	1	1	1	1	1	1	1	1	1	1	0	1	0	0
71	89	VvCYP89A2h	1	1	1	1	1	1	1	1	1	1	1	0	1	0	0
71	89	VvCYP89A2i	1	1	1	1	1	1	1	1	1	0	1	0	1	0	0
71	89	VvCYP89A2j	1	1	1	1	1	1	1	1	1	1	1	0	1	0	0
71	89	VvCYP89A2k	1	1	1	1	1	1	1	1	1	0	0	0	1	0	0
71	89	VvCYP89A2l	1	1	1	1	0	1	1	0	0	0	0	0	1	0	0
71	93	VvCYP93D1a	1	1	1	1	1	1	1	1	1	1	1	1	1	1	0
71	93	VvCYP93D1b	1	1	1	1	1	1	1	1	0	1	1	1	0	0	0
71	93	VvCYP93D1c	1	1	1	1	1	1	1	1	0	1	1	1	0	1	0
71	93	VvCYP93D1d	1	1	1	1	1	1	1	1	0	1	1	1	0	1	0
71	98	VvCYP98A3	1	1	1	1	1	1	1	1	0	0	1	1	1	0	0
79	706	VvCYP706A3a	1	1	1	1	1	0	1	1	1	1	1	1	1	1	0
79	706	VvCYP706A4a	1	1	1	1	0	1	1	0	0	0	1	1	1	1	0
79	706	VvCYP706A1	1	1	1	1	0	1	1	0	0	0	1	1	1	0	0
79	706	VvCYP706A4b	1	1	1	1	1	1	1	1	1	0	1	1	1	1	0
79	706	VvCYP706A4d	1	1	1	1	1	1	1	1	1	1	1	1	1	0	0
79	706	VvCYP706A3b	1	1	1	1	1	1	1	1	1	1	1	1	1	0	0
79	706	VvCYP706A3c	1	1	1	1	0	1	1	0	0	0	1	1	1	0	0
79	706	VvCYP706A3d	1	1	1	1	1	1	1	0	1	0	1	1	1	0	0
72	709	VvCYP709B3	1	0	1	1	0	0	1	1	0	0	0	1	0	0	0
72	714	VvCYP714A1a	1	1	1	1	0	0	1	1	0	0	0	0	0	0	0
72	714	VvCYP714A1b	1	1	1	1	0	0	1	1	0	0	0	1	0	0	1
72	714	VvCYP714A1c	1	0	1	1	0	0	1	1	0	0	0	0	0	0	0
72	714	VvCYP714A1d	1	1	1	1	0	0	1	1	0	0	0	1	0	0	0
72	715	VvCYP715A1	1	0	1	1	0	0	1	1	0	0	0	1	0	0	0
72	72	VvCYP72A10a	1	1	1	1	0	0	1	1	0	0	1	1	0	0	1
72	72	VvCYP72A11a	1	1	1	1	0	0	1	1	0	0	0	0	0	0	1
72	72	VvCYP72A10b	1	0	1	1	0	0	1	0	0	0	1	0	0	0	1
72	72	VvCYP72A10c	1	1	1	1	0	0	1	1	0	0	1	1	0	0	1
72	72	VvCYP72A10d	1	1	1	1	0	0	1	1	0	0	1	1	0	0	1
72	72	VvCYP72A10e	1	1	1	1	0	0	1	1	0	0	1	1	0	0	1
72	72	VvCYP72A10h	1	1	1	1	0	0	1	1	0	0	1	1	0	0	1
72	72	VvCYP72A10j	1	1	1	1	0	0	1	1	0	0	1	1	0	0	1
72	72	VvCYP72A10k	1	1	1	1	0	0	1	1	0	0	1	1	0	0	1
72	72	VvCYP72A11c	1	1	1	1	0	0	1	1	0	0	1	1	0	0	1
72	72	VvCYP72A10m	1	1	1	1	0	0	1	1	0	0	1	1	0	0	1
72	72	VvCYP72A10n	1	1	1	1	0	0	1	1	0	0	1	1	0	0	1
72	72	VvCYP72A10o	1	1	1	1	0	0	1	1	0	0	1	1	0	0	1
72	72	VvCYP72A11d	0	0	0	1	0	0	1	1	0	0	0	1	0	0	1
72	72	VvCYP72A10q	1	1	1	1	0	0	1	1	0	0	1	1	0	0	1
72	72	VvCYP72A10r	1	1	1	1	0	0	1	1	0	0	1	1	0	0	1
72	72	VvCYP72A10s	0	0	0	1	0	0	1	1	0	0	0	1	0	0	1
72	72	VvCYP72A10t	1	1	1	1	0	0	1	1	0	0	1	1	0	0	1
72	72	VvCYP72A10u	0	1	0	1	0	0	1	1	0	0	0	1	0	0	1
72	72	VvCYP72A10v	1	1	1	0	0	0	1	1	0	0	1	1	0	0	1
72	72	VvCYP72A10i	0	0	1	0	0	0	1	1	0	0	0	1	0	0	1
72	721	VvCYP721A1a	0	0	0	0	0	0	1	0	0	0	0	0	0	0	1
72	721	VvCYP721A1d	1	1	1	1	0	0	1	0	0	0	0	0	0	0	1
72	734	VvCYP734A1a	1	1	1	1	0	0	1	1	0	0	1	0	0	0	1
72	734	VvCYP734A1b	1	0	1	1	0	0	1	1	0	0	1	1	0	0	1
72	735	VvCYP735A1	1	1	1	1	0	0	0	1	0	0	0	1	0	0	0
74	74	VvCYP74A1a	1	0	1	1	0	0	0	0	0	0	0	0	0	0	0
74	74	VvCYP74A1b	0	1	1	0	0	0	0	0	0	0	0	0	0	0	0
74	74	VvCYP74A1c	0	1	1	1	0	0	0	0	0	0	0	0	0	0	0
74	74	VvCYP74B2	0	1	1	0	0	0	1	0	0	0	0	1	0	0	0
74	74	VvCYP74A1d	0	1	1	0	0	0	0	0	0	0	0	0	0	0	0
74	74	VvCYP74A1e	0	1	1	1	0	0	1	0	0	0	0	0	0	0	0
85	702	VvCYP702A2	0	0	0	1	1	0	0	0	0	0	0	1	0	1	0
85	707	VvCYP707A1b	1	0	1	1	1	1	0	0	0	0	0	1	0	0	0
85	707	VvCYP707A1c	1	0	1	1	1	1	0	0	0	0	0	0	0	0	0
85	707	VvCYP707A1d	1	0	1	1	1	1	0	0	0	0	0	0	0	0	0
85	707	VvCYP707A1e	1	0	1	1	1	1	1	0	0	0	0	1	0	0	0
85	708	VvCYP708A1a	1	1	1	1	0	1	1	0	0	0	0	1	0	1	0
85	708	VvCYP708A2	0	0	1	1	1	1	1	0	0	0	0	0	0	0	0
85	716	VvCYP716A1a	1	0	1	1	1	0	0	0	0	0	0	0	1	0	0
85	716	VvCYP716A2a	0	0	0	1	1	0	1	0	0	0	0	1	1	0	0
85	716	VvCYP716A1b	0	0	0	1	1	0	1	0	0	0	0	1	1	0	0
85	716	VvCYP716A1c	1	1	1	1	1	0	1	0	0	0	0	0	0	0	0
85	716	VvCYP716A1e	1	0	1	1	0	0	0	0	0	0	0	0	0	0	0
85	716	VvCYP716A1g	0	0	1	1	0	0	1	0	0	0	0	1	0	0	0
85	716	VvCYP716A1i	1	0	1	0	1	0	0	0	0	0	0	1	0	0	0
85	716	VvCYP716A1j	1	0	0	1	1	0	0	0	0	0	0	0	0	0	0
85	716	VvCYP716A2b	1	1	1	1	1	0	0	0	0	0	0	0	0	0	0
85	720	VvCYP720A1	1	0	1	1	1	1	0	0	0	0	0	0	0	0	0
85	722	VvCYP722A1a	1	1	1	1	1	1	1	0	0	0	0	1	0	0	0
85	722	VvCYP722A1b	1	0	1	1	1	0	1	0	0	0	0	0	0	0	0
85	724	VvCYP724A1	1	1	1	0	0	1	0	0	0	0	0	0	1	0	0
85	85	VvCYP85A1a	1	1	1	0	0	1	1	0	0	0	0	1	0	0	0
85	85	VvCYP85A1b	1	0	1	1	1	1	1	0	0	0	0	0	0	0	0
85	85	VvCYP85A1c	1	0	1	0	0	1	1	0	0	0	0	1	0	0	0
85	87	VvCYP87A2a	1	1	0	1	0	1	1	0	0	0	0	1	0	0	0
85	87	VvCYP87A2b	1	0	1	1	1	1	0	0	0	0	0	1	0	0	0
85	87	VvCYP87A2c	1	0	1	1	1	1	1	0	0	0	0	1	0	1	0
85	87	VvCYP87A2d	1	1	1	1	1	1	1	0	0	0	0	1	0	1	0
85	87	VvCYP87A2e	1	1	1	1	0	1	1	0	0	0	0	1	0	1	0
85	88	VvCYP88A3b	1	0	1	1	1	1	1	0	0	0	0	1	0	0	0
85	90	VvCYP90B1a	0	0	0	1	1	0	1	0	0	0	0	0	0	0	0
85	90	VvCYP90C1a	1	1	0	0	1	1	0	0	0	0	0	0	0	0	0
85	90	VvCYP90C1b	1	0	1	0	1	1	0	0	0	0	0	1	0	1	0
85	90	VvCYP90A1	1	0	0	1	1	1	1	0	0	0	0	0	0	0	0
85	90	VvCYP90B1b	1	0	0	1	1	0	0	0	0	0	0	0	0	0	0
86	704	VvCYP704A2	1	1	1	1	0	0	0	1	0	0	0	1	0	0	0
86	704	VvCYP704A1a	1	1	1	1	0	0	1	1	0	0	0	1	0	0	1
86	704	VvCYP704A1b	1	1	1	1	0	0	1	1	0	0	0	1	0	0	1
86	704	VvCYP704A1c	1	1	1	1	0	0	1	1	0	0	0	1	0	0	1
86	704	VvCYP704A1d	1	1	1	1	0	0	1	1	0	0	0	0	0	0	0
86	704	VvCYP704A1e	1	1	1	1	0	0	1	1	0	0	1	1	0	0	0
86	704	VvCYP704A1f	1	1	1	1	0	0	1	1	0	0	0	0	0	0	0
86	86	VvCYP86B1a	1	1	1	1	0	0	1	1	0	0	0	0	0	0	0
86	86	VvCYP86C1	1	1	1	1	0	0	1	1	0	0	0	1	0	0	0
86	86	VvCYP86A1a	1	1	1	1	0	0	0	0	0	0	0	1	0	0	0
86	86	VvCYP86B1b	1	1	1	1	0	0	1	1	0	0	0	1	0	0	0
86	86	VvCYP86A1b	1	0	1	1	0	0	1	0	0	0	0	1	0	0	0
86	86	VvCYP86A1c	1	1	1	1	0	0	0	0	0	0	0	1	0	0	0
86	94	VvCYP94C1a	1	1	1	1	0	0	1	1	0	0	0	1	0	0	0
86	94	VvCYP94C1b	1	1	1	1	0	0	0	1	0	0	0	1	0	0	0
86	94	VvCYP94D1	1	1	1	1	0	0	1	0	0	0	0	0	0	0	0
86	94	VvCYP94C1c	1	1	1	1	0	0	1	1	0	0	0	1	0	0	0
86	94	VvCYP94B1a	0	0	1	1	0	0	0	1	0	0	0	1	0	0	0
86	94	VvCYP94B1b	1	1	1	1	0	0	0	1	0	0	0	1	0	0	0
86	96	VvCYP96A1a	1	1	1	1	0	0	1	0	0	0	0	1	0	0	0
86	96	VvCYP96A1b	1	1	1	1	0	0	1	0	0	0	0	1	0	0	0
86	96	VvCYP96A1c	1	1	1	1	0	0	1	0	0	0	0	1	0	0	0
86	96	VvCYP96A1d	0	1	0	1	0	0	1	0	0	0	0	1	0	0	0
86	97	VvCYP97B3	0	1	1	1	0	0	1	0	0	0	1	0	0	0	0
86	97	VvCYP97C1	1	1	1	1	0	0	1	0	0	0	0	0	0	0	0
710	710	VvCYP710A1	0	0	1	1	0	0	1	0	0	0	0	1	0	0	0
711	711	VvCYP711A1b	1	0	1	0	0	0	1	0	0	0	0	0	0	0	0
