# Supplementary material for: The Cytochrome P450 Monooxygenase Inventory of Grapevine (Vitis vinifera L.): Genome-Wide Identification, Evolutionary Characterization and Expression Analysis
Source: Front Genet. 2020 Feb 18;11:44. doi: 10.3389/fgene.2020.00044 (PMC7040366; doi:10.3389/fgene.2020.00044)
Supplement: Supplementary file 4 [file Table_4.xlsx]

## Sheet: Sheet 1
Table S4. List of the number of potential cis-element of 236 VvCYPs promoter regions in grapevine.
Function	Common cis-acting element in promoter and enhancer regions	Core promoter element around -30 of transcription start	Abscisic acid responsive element	Gibberellin-responsive element	Gibberellin-responsive element	Gibberellin-responsive element	Salicylic acid responsive element	Salicylic acid responsive element	Salicylic acid responsive element	Auxin-responsive element	Auxin-responsive element	Part of an auxin-responsive element	MeJA-responsive element	MeJA-responsive element	Ethylene-responsive element	Anaerobic induction	Defense and stress responsiveness	Endosperm-specific negative expression	MYB binding site involved in drought-inducibility	Wound-responsive element	Low-temperature responsiveness	Stress-responsive element	Dehydration-responsive element	Wounding and pathogens	Zein metabolism regulation	Cell growth promotion	Circadian control	Differentiation of the palisade mesophyll cells	Seed-specific regulation	Cis-acting regulatory element related to meristem	Endosperm expression	Flavonoid biosynthetic genes regulation	Cis-acting regulatory element related to meristem expression	Light responsive element	Light responsive element	Part of a light responsive module	Part of a conserved DNA module involved in light responsiveness	MYB binding site involved in light responsiveness	Part of a light responsive element	Part of a conserved DNA module involved in light responsiveness	Light responsive element	Part of a module for light response	Part of a light responsive element	Part of a light responsive element	Light responsive element	Part of a light responsive element	Part of a light responsive element	Light responsive element	Part of a conserved DNA module involved in light responsiveness
Elements	CAAT-box	TATA-box	ABRE	P-box	GARE-motif	TATC-box	TCA	TCA-element	SARE	TGA-element	AuxRR-core	AuxRE	CGTCA-motif	TGACG-motif	ERE	ARE	TC-rich repeats	AACA motif	MBS	WUN-motif	LTR	STRE	DRE core	W box	O2-site	MYC	circadian	HD-Zip 1	RY-element	CCGTCC motif	GCN4_motif	MBSI	CAT-box	GT1-box	G-box	AT1 motif	Box 4	MRE	TCT-motif	ATCT-motif	ACE	AE-box	TCCC-motif	GATA-motif	4cl-CMA2b	I-box	LAMP-element	3-AF1 binding site	ATC-motif
VvCYP51G1a	27	29	2		1	1	1								4	5	2									2							1	2	2	2	1	1	1					1
VvCYP51G1b	30	36	1				3									1			2					1		1							1	1			2	1	1	2				4
VvCYP701A3	24	65	1	1						2					5	2			1			2		1	1	2	1								1		3		1		1	1		2
VvCYP703A2	30	18	6							1			1	1	1	2				1		1		1		4								2	8		1		1				1
VvCYP705A2	12	1					1									2									1	1																		1	1
VvCYP705A3a	31	52					1								1					3		1		2		1							1			2	3							1		1	1
VvCYP705A3b	41	28					3										1				1			1		4		1	1					4				1	2				1	1		1		1	1
VvCYP71B10a	34	64	3				1	1		1					2	1				2		3				4	1			1			3		1		2	1								1	1
VvCYP71B10b	34	64	3				1	1		1					2	1				2		3				4	1			1			3		2		2	1								1	1
VvCYP71B10c	34	64	3				1	1		1					2	1				2		3				4	1			1			3		2		2	1								1	1
VvCYP71B10d	24	31	2													4			1			2				3		1			1		2		2		1		1			1
VvCYP71B10e	24	31	2													4			1	2		2				3		1			1		2		2		1		1			1
VvCYP71B24a	29	54	1	1									1	1	2	1						1			1	5									1	1	4							1		2
VvCYP71A14a	27	119	2			2									4					1				2		3		1							3		1		1				1	1
VvCYP71A25	8	1																				1				3
VvCYP71A22	37	40	4				1								3	1	1				1	2				4							1		5		2		1		1
VvCYP71B4	22	21	1					1								1						1			1	1							2				2	1	1					1
VvCYP71B24b	22	54						2							11	10										2											4	2	2	1				1
VvCYP71B24c	22	54						2							11	10										2											4	2	2	1				1
VvCYP71B3a	23	53	2			1							2	2	3	2				1		1		1		3									1	1	4		1							3
VvCYP71B23	38	32	1					1								2					1			2		4									1	1	1	1	1	2		1
VvCYP71A14b	41	42			1	1							1	1	2	2			2	1		3				2											2	1	2	1			1	1		1
VvCYP71A23	28	115								1			1	1	2					1		2		1		2											3							2		1
VvCYP71B10g	26	60													3	5	1			1					2	1		1											2
VvCYP71B31	28	60	2			1							1	1	3	2			1	1		1				1									2		5		1					1
VvCYP71B3b	29	27	2				1						1	1	2	2				6		1		1	1	5	1			1					1		1		2		1					1
VvCYP71B3c	31	46					1						1	1	1		1							1	1	2	3	1									7							1
VvCYP71B10h	22	42	1										1	1	3					1		2	1			1							1		1		4	1						1		1
VvCYP71B20	26	41	1	1				1		1	1				1		1			3		1		1		2											4
VvCYP71B10i	38	36	2	1							1		1	1	3	1				2		2				2	1			2			1		2		5					1		2
VvCYP71B10j	33	16	4							1	1				1	2			1			1		2		4				1					4		2		1				1			1
VvCYP71B10k	33	16	4							1	1				1	2			1			1		2		4				1					4		2		1				1			1
VvCYP712A1a	15	19											1	1		3								1	1	2							1				2									1
VvCYP73A5a	39	24	2					1			1		5	5	3	1					1	3				3									1		3			2				1
VvCYP73A5b	24	53	1	1				2							5	1			1		2	1		1	1	1				2							4										1
VvCYP73A5c	26	51		2				2					1	1		2					1	2	1			2	1										2		1			1		1		2
VvCYP75B1a	22	68									1				5	2				2		3				1			1				1				2			1			1			1
VvCYP75B1b	15	27						1					2	2	2		1					1		1		3	1			2					1				1				1
VvCYP76C1a	39	24								1					1	2				1				2		6											1						1						1
VvCYP76C1b	20	16	1	1	1		1	1		1						1						3		1	2	2	1								1		2		1			1		1
VvCYP76C1d	6	2						1									1
VvCYP76C1e	31	58	4							1			1	1	3		1			2		1		2		4									2		5						1			1
VvCYP76C1f	33	77	3										1	1	3				1			1			1	2	1				1				2		4		1			2		1		2			1
VvCYP76C1g	36	39											1	1	4											3	1	1									4	1						1		1	1		1
VvCYP76C1h	27	30																			1	3			1					1							3		1
VvCYP76C1i	27	13	1	1			1	1					3	3		1			1			2		1									2		1		2	1	2			1		1				1
VvCYP76C1l	27	5	2										1	1		4					1	1		1		1						1			2				1			3	2	1
VvCYP76C4b	22	90	3			1				1					3		1		1			1			1	4							1		3		4	1	1		1
VvCYP76C4c	22	93	3			1				1					3		1		1			1			1	4							1		3		4	1	1		1
VvCYP76C4d	22	63						1	1						9	2						1				2					1						9							2		1
VvCYP76C4e	14	72	2	1							1				2	1	1		1			1				1					1	1	2		1		6		1					1
VvCYP76C5c	14	12						1								1			1			1				2		1					2		1		2	1						1		1
VvCYP76C2a	10	6	3				1						1	1					1			1				2									1				1				1
VvCYP77B1	35	62		1				2							3	3										6											4							1		1
VvCYP77A4	20	30	1	1		1							1	1		2	2		1	2	1	2		1	1								1		1		1		1
VvCYP78A5	23	101	1				1						1	1	1	2	2					1				3									1		3	1	1
VvCYP78A10a	30	42	2					1							1	3	1			1	1	2				4									1		4	1	2	1				1		1
VvCYP78A6	28	38	4				1				1		3	3	1	1			1		1	2		1	1								1		2		2		1								2
VvCYP78A7a	16	54					1						1	1	3	1						4				1				2	1						6		2	1			2	1		1
VvCYP78A10b	19	21	8		1								3	3	2	1						3				4		1		2		1			3		1		1			1	1
VvCYP78A10c	24	35	1					1		2			1	1	5	1	1					1		2	2	5	2								1			1	1
VvCYP78A7b	25	56	1				1								4	4			1			2		2		4					1				1		8									1
VvCYP79A2a	26	47	4		2								1	1	2	2	1			1		1		1			1								3		7									1
VvCYP79A2b	28	114	2			1		1							3	1				1		2				3			1		1				2		1
VvCYP79A2e	30	18	2		1			2		1					2					1				1		5							1		1		1		2							2
VvCYP79A2f	32	20	2		1		2			1					1					1		1		1	2	5							1		1		4		2					2		2
VvCYP79A2g	32	20	2		1		2								2					1		1		1	2	5							1		1		4		2					2		2
VvCYP79A2h	39	28						2		2			1	1	3	4				1						9				1							3	1						1
VvCYP79A2i	43	31											1	1		1	1		1		1	1				4											3		1			2	1
VvCYP81D1a	9	58	2			1		2			1				1	1				1					1	1									1		3						2
VvCYP81D1b	10	79	1					1					1	1	4	2	1																				1											1
VvCYP81D1d	14	54	3				1						1	1	6	1	2		1	4				2		2					1				1		7
VvCYP81D1e	35	47					2	2					1	1	1	2		1	2					1		1	1										3	2						1			1
VvCYP81D1f	29	47				1									3	2				1				1		3	1		1						1		5		1
VvCYP81D4b	31	58	1												3	1			1	1		1		1		1			1						1		6
VvCYP81D1h	32	18					2	4		1	1		1	1		2			1					1		1	1			1							1	3									1
VvCYP81D1i	32	35	2					1							2	1			1						1	3									1		3	1	1
VvCYP81D1j	39	76											1	1	2	2								1		2											3	1		1		1		1			1
VvCYP81D2a	29	30	3							1			3	3	1	1						1	1	2		3					1	1			3				1		1					1
VvCYP81D3a	25	55		1						1					4	1	1							3	1	4			1								3
VvCYP81H1	33	34	2				1	1					1	1	1	4				1	1	1		1	1	6					3				2		6	1
VvCYP81D2b	28	40	1			1		1					2	2	3						2	1		1	1	3											3
VvCYP81D3b	23	43													4	2						1			1	7					1						6		1								1
VvCYP81D5	15	138	5				1								3					2						1						1			3		6					1		2		3	1
VvCYP81D1l	27	15	1			1							1	1		2			1							1							1		3									1
VvCYP81D4c	32	46													3	4								2		1									1		3	1						1					1
VvCYP81D2c	25	44		1						1					4	1	1							3	1	4			1								3
VvCYP81D8	38	32			1			1				1	1	1	1	2			3	1		1	3		1	3		3							1		3	1	1					2
VvCYP81D4d	15	13				1					1		1	1	2	2						2				1							1		2		1		1					1
VvCYP82C4a	36	10	1				1						1	1					1			2				4
VvCYP82C3b	33	17	1		1										1	1	1				1	1		1	1	8												1	1					1
VvCYP82C2b	16	21	5	1	1					2	1		1	1		1			4		1	2		3		5	1			1	1				3		2		1				1	3		1
VvCYP82C2c	31	78	3				1	1							1							1		1		2		1							1		4	1					1				1
VvCYP82C2d	20	39	1								1				1	2	1				1	5		1		1		1		1					1		3	1						1		1	1
VvCYP82C2e	31	36																	1	1		1		1	1	2											2	1	3					1
VvCYP82C2f	15	47	2										2	2	1	2			1			2		1									2		2		3	2	1		1						1
VvCYP82C3c	11	14						1					1	1	1							1					1						1				1		1					1
VvCYP82C4b	35	70											2	2		2			2			3		2		4							1				3	1						1
VvCYP82C4c	33	46											2	2	2				1			1		3	1	2												1						1
VvCYP82C3d	27	74						1		1					3	1				1		2				3	1		1				1				4	1									1
VvCYP82C2k	16	21	4	7		3										3					3	6		2		1		1	1						3		4				2					1
VvCYP82C4d	30	40					1																	1		3	1	1									4		1
VvCYP82C2l	37	42		1				1		1			1	1		1			1	3		1				4							1						3				1
VvCYP82C2m	34	44	2				1								5				1	1		1		1	1	2									1			1	1					1		1	1
VvCYP82C2o	27	74						1		1					3	1				1		2				3	1		1				1				4	1									1
VvCYP82C4e	27	40	2	1		1				1						2				1	1					6					1				1		2		1		1	1		1
VvCYP83B1	27	49		1				1							3	2						1				4					1						1		1
VvCYP84A1a	20	64						2					1	1	2	1				1		2				2	2										2							1
VvCYP84A1b	32	39	1										1	1	3	2				2	1	1		1	1	2									2		1
VvCYP84A1c	27	30	4										5	5	1	4						1		1		3									1		1							1		3
VvCYP89A5	27	15				1		1											1	1		1				4											1	1	2					1
VvCYP89A2a	8	27	1												1									1											1				1
VvCYP89A2b	33	25	1	2						1			1	1						1		2	1	1		4									2		2		2				1
VvCYP89A2c	20	48	1			1									2	1								1	1						1				1		1
VvCYP89A2d	30	88						2							8	2						3																						1
VvCYP89A2e	28	85	1				1								4	2										3	1								1		4		1			2				1
VvCYP89A2f	37	34	2	1				1			1		2	2	2	4	2			2		1		2	2	7									2		1	1				1				2
VvCYP89A2g	28	86	1				1								4	2										3	1								1		4		1			2				1
VvCYP89A2h	35	69					1								1	2	1								1	1											4					1		2		4			1
VvCYP89A2i	38	44	3	2		1							1	1	1	2	1							1	1	2					1				2		4	1	1	3	1	1
VvCYP89A2j	40	22		1				1					1	1		2			2	1		2			1	4									1		2			2		2	1	1
VvCYP89A2k	28	40				1							1	1	3						1	2		1	1	1					1						4		1			1	1	4
VvCYP89A2l	30	22	2												1	1					1	2				3									1			2					1	1		2
VvCYP93D1a	33	29	2					2		1	1		1	1		5				2		1				3					1		1		2		1		1	1				1		2	1
VvCYP93D1b	27	28						1			1		2	2	2	3				1		1			1	4	1					1					2					1	1
VvCYP93D1c	22	22	7		1			1								3	1			1		2			1	3									6			1	1		1			2		1		1
VvCYP93D1d	26	104											1	1	2	1								1		2	1										5		1					1
VvCYP98A3	30	28	1										1	1	2							5		1		1									1		2		1							1
VvCYP706A3a	28	34	2							1			1	1	7	1	1			2	1	2				3	1								2		5							1
VvCYP706A4a	11	4	1				1																	1	1								1		2						1	1				1
VvCYP706A1	25	25	1			1							1	1	5	1	1					1				1											2					1
VvCYP706A4b	31	51	5										1	1	2	1								1		6									4		1		1			1		3
VvCYP706A4d	43	13	1										1	1	1	2	1			1		1				2									1		1					1		1		1	1
VvCYP706A3b	22	40		1		1							1	1	3					1	1	1				2									1		4	1	1					1
VvCYP706A3c	19	21	1	1			1						1	1	3					1						1							1		2		4									1
VvCYP706A3d	39	41	2				1						1	1	1											4		1					2		2		4
VvCYP709B3	36	45	1													1			1			1		1		1									1		3		1		1			1		1	1
VvCYP714A1a	41	53	1				1								1	1	1			1	2	3		1		3											7						1	1		1
VvCYP714A1b	29	31	1		1	1														1		3		1	1	2							1		1		2							2			1
VvCYP714A1c	37	40	3	1											2	1			1	1		1		1	1								1		2		2
VvCYP714A1d	26	141	3				1			1			1	1	1	2	1			1						1	2								1		4	1	3			1	1	3		1
VvCYP715A1	26	33	1			1							1	1	1	1			1			2		1		4									1				2		1	1		1			1
VvCYP72A10a	27	60		1									2	2	7	4	1			1				1		2							1				4	1						3		1
VvCYP72A11a	31	34											2	2	2				1					3		3											3							1
VvCYP72A10b	25	21			1	1							1	1							1	1				6													1			1
VvCYP72A10c	32	71				2	1						1	1	2	1	1								1	5											4	1	3					3					1
VvCYP72A10d	26	61	3							1			1	1	3				1	1		1		1	1	3									4		3		2				3	1
VvCYP72A10e	33	81		1		1	1								2	2				1	1			1	1	5	1						1		1		4	1						2
VvCYP72A10h	30	14	3										1	1	3		1		3	1		1				3									3		2
VvCYP72A10j	25	34			1								2	2	1	1	1					1		1		4							1				3	1	4			1						1
VvCYP72A10k	21	55	3										1	1	4	1			1							3									2		2							1
VvCYP72A11c	25	48	2			1							1	1	5	1			1	3						4									2		1							1		1
VvCYP72A10m	26	69	2										1	1	5	2				3						3									2		3	1	1					1
VvCYP72A10n	22	35	2										1	1	7	4			1	4		1				1									2		4		1					1
VvCYP72A10o	30	38	3	1		1							3	3	2	1			1			1				9							1		2		3	1	2					4
VvCYP72A11d	32	24	2													3	1		1	1		1				1	1										6		1					1
VvCYP72A10q	35	34	2			1				1			1	1	1	3	1		1			2				1									1		3					2
VvCYP72A10r	26	35	1			1				1			1	1	1	2	1		1		1	2				1											3		1			2		1		2	1
VvCYP72A10s	8	14	1													2								1		2	1
VvCYP72A10t	27	88		1			2								2	1	2		1		2	3		1	1	3							1		1						1		1	2		1		1
VvCYP72A10u	37	17	3										1	1	5	3	2					5			1	4											2						1
VvCYP72A10v	21	67					1								2	3								1		6							1				5		1
VvCYP721A1a	13	40	2							1					5	1	1					2					1								2		7	1			1		1
VvCYP72A10i	30	14	3										1	1	3		1		3	1		1				3									3		2
VvCYP721A1d	25	67			1										4	1	1		1	1	1	3				3											7	1						1
VvCYP734A1a	36	17	1				1								1	2					1	3		3	2	5									2		3	2		1			1	3
VvCYP734A1b	28	18													1	1					1	6		3	1	4									1		1			1				1			1
VvCYP735A1	35	39		1	1										3							5		1		1																	1
VvCYP74A1a	31	37	1										3	3	1	1			2			1		1		4									2		4
VvCYP74A1b	48	57	2							1					2				1			3		1		3	1								1		1	2		1	1
VvCYP74A1c	31	93	3	1		1							1	1	1				1	1		3				3									3		2	1		1				1		1
VvCYP74B2	26	90	5										1	1		3	1			2		1		2	1										3		2	1						1		1
VvCYP74A1d	23	11	8				1			2			2	2		2	1		1	2	1	2		2		6									6								2
VvCYP74A1e	31	37	1										3	3	1	1			2			1		1		4									2		4
VvCYP702A2	30	51					1								3	1				3				1		1	1						1		1		3	1	1
VvCYP707A1b	30	44	1	1		1									2					1		3		1															1							1
VvCYP707A1c	13	26	14							2			3	3		2						4		2		2							1		7				2				1	3		1
VvCYP707A1d	9	22					1								6							1				1													1
VvCYP707A1e	24	9	3				1			1			1	1		1	1		2	1		2		2		4									3							1	2	1		1
VvCYP708A1a	34	63													1							2				2							2				9
VvCYP708A2	39	88													1	1										3													4
VvCYP716A1a	27	59	1	1		1									2	1				4	1	3		2		4											4		1									1
VvCYP716A2a	25	9	1		1														1			4		1		1							2									3
VvCYP716A1b	31	31	1													1								1		2									1		4			1		1	1			1
VvCYP716A1c	31	41	1				1								3	3	1		2	1	1	1		2											1		1	1										1
VvCYP716A1e	30	33					1								1							1				3							1				5	1		1			1	1		2
VvCYP716A1g	23	19													1	1										4							1				5					1
VvCYP716A1i	28	17	2				1						1	1	1	1	1					3		1		6		1									2					1	1
VvCYP716A1j	19	65		1		1									3	2			1	2					1	3											3	2	2			1
VvCYP716A2b	26	55	1				1								7		1			1						1	1								1		1
VvCYP720A1	12	79	2	1			1												2			3		3		4	1						1		1			1	1	1			1	1
VvCYP722A1a	53	24	3				1						1	1			1					1		2		8									2		4		1				1				1
VvCYP722A1b	26	10	4		1										1	3	1					1			2	5									1		1					2
VvCYP724A1	33	61				1							1	1							1			1		3	1										1							2		1
VvCYP85A1a	16	22	13	1						3						5			2			4	1	1	1	5									11		2		1		1			1
VvCYP85A1b	22	66					1						1	1	3	1	1			1		2				1											2		1			1	1
VvCYP85A1c	20	22		2											1	7				1		6				2											2	1	1		1
VvCYP87A2a	37	18			1											1			1	2						5	1												1			1	2
VvCYP87A2b	21	110	4										2	2	4		1			1	1			1		2	1								2		5	2		1
VvCYP87A2c	17	143	2	1			1								3					1				1	1												4		1			1
VvCYP87A2d	35	30					1								1					1		1		1		2											1			1	1
VvCYP87A2e	27	19					1						1	1						1		1		1		2							1				1			4				1
VvCYP88A3a	22	24	2	1			1						2	2		1			1	2		3			2	2									4		2		1			1					1
VvCYP88A3b	26	59								1					4					1		2		1		1									1		6
VvCYP90B1a	31	28				1				1						3	1				1	2		3		3							1				1							1
VvCYP90C1a	22	30			1					1					3					3		3				3							2						1				1	1				1
VvCYP90C1b	19	23	1										1	1		1				1	1				1	3	1										4		1			1	1	1				1
VvCYP90A1	27	35					1															9		1		3							1		1		5							1		4
VvCYP90B1b	24	50	2			1									1	1				2		1		1		5									3				2		1		1	2			1
VvCYP704A2	24	42	2	6		3	1						2	2	1	1	1		1			3		1	1	3							1		1		1		1		1			2
VvCYP704A1a	30	77		1									1	1		1			2					1		2							1				6										1		1
VvCYP704A1b	33	97													3				1							4							1				12					1
VvCYP704A1c	26	127		1			1								2	1	1		1					1		4							1				3							1
VvCYP704A1d	20	28	1	1			1						1	1	3	3			1	1	1	2			1	1											7		1				1
VvCYP704A1e	26	23								2			1	1	1	2						6		1	1	4											1					1		3		1
VvCYP704A1f	43	19	1				1								4	2						4			1	9									1			1
VvCYP86B1a	33	36		1	1		1						1	1	1		1		1			4		2		7											1	2	1			2		1		1
VvCYP86C1	23	80	1												1	2					1	1		2			1								1		4	2	1			1		1
VvCYP86A1a	14	25	1							2						8	1		1	1		2				3											1	1				1
VvCYP86B1b	33	24	1										1	1	3	4						3		3		6										1	1		1
VvCYP86A1b	30	42	3										1	1		2	2		1					2	1	3									1		1		4								1
VvCYP86A1c	24	45					3			1						2								1	4	2									1		1							1
VvCYP94C1a	25	51	4										1	1	1	3			1	1		2			1	1	1								2				1								1
VvCYP94C1b	24	18	3				1						1	1			1				1	2				3									2		2		1				1	2				1
VvCYP94D1	32	31	1												1	2			1		2	4				3											1	1		1				1
VvCYP94C1c	32	24	5	2			2			3			1	1	1	1	1			1					1	2		1							5		1		1		1	1		2		2
VvCYP94B1a	42	51	2										1	1	4	3			1	1		2		1		4							1		1		1	3				1	2
VvCYP94B1b	37	67	4										1	1	2	2	1			2	1	1				4		1							2		2		1			1
VvCYP96A1a	29	46		1											7	9				2		1				4													2			1					1		1
VvCYP96A1b	36	27	1	2			1								1	1						1			2	2									2		1						1
VvCYP96A1c	25	36					1			1			1	1		3			1		1				2	2											5		1
VvCYP96A1d	19	47	2			2	1						1	1	2	2				1		2				3									2		8		2	1		1
VvCYP97B3	27	34		1									3	3		1	1		1			2															1
VvCYP97C1	31	47			1		1									3	1				1					5		1					1						1							1	1
VvCYP710A1	21	61	4				2								4	1			2			2		2		2									2				2			1	3	1
VvCYP711A1b	35	43		2									1	1	2		2					2				3	1						1					1	1					3		3
[truncated: 58 more columns]
