# Supplementary material for: The Cytochrome P450 Monooxygenase Inventory of Grapevine (Vitis vinifera L.): Genome-Wide Identification, Evolutionary Characterization and Expression Analysis
Source: Front Genet. 2020 Feb 18;11:44. doi: 10.3389/fgene.2020.00044 (PMC7040366; doi:10.3389/fgene.2020.00044)
Supplement: Supplementary file 8 [file DataSheet_1.fasta]

>VvCYP51G1a  (1500 bp)
CTACTTCGGTCCCATTGTTATATATTTCATATTTTATACATCATCTTATTATTTTAAATCATCATATCTATTTATATTCTTACTAAAAAAAAACTCAAATTTCATCGTACACTCATTATTTACTTTATACTTTCATCACAAGCAAAATATTTGGCTGAAAGTTGGGTAGGTAATATTTTTAACATGAAAAATGTTTTTGAAGGAAGGTAAAAAATAAAAAGCAAAAATCACTTATGCTATTTTTTTGAAAAAAAAATTGGATAGGTAATGGCTATTAAAAATGATTTTTAAAGATAAAATGAAATACAAAATAATTTTTAAAGAACAAGTAAAAGTTATTTTCATTGATTTTTAAAATCAAAAGAAAAACATAGACCCGTTTGATCATGTTTTTTTAAATTTGTTTTTAAAAATTGTTTTTAAATTTAAAAATAAAAAATAATTTTTAAAAACAAATTTAAGGAAATATAATCAAATGGATCATATATTTTTACTAAAAACACTTTTAAGATAAACATTGTTAAACATACTTTTAAAAAAATAATATAATAAATTTCATAATTATACCAACCATCTAAATAGTAAATATTGCAATGCACCTATCCCATACCATAATATGACACATTGATTTTCTAAAATAAAACCAAAATTATTTTCCATAAAATCGGAATTTATTAGAAATTATTGTGTTACTTGTGTTGATTAATTAACCACAAAAGACTTTGATTTTGGATTTAATCGGTCAGGTTAGAGGCCAAACCACCTTGGAGAGCCCATGGTTTTGGTTTTCAAGAACCAATGGGCCCAGCTCAGGCCCGGTTCAGAACCGCTATAAAATACAGTTTCAAAAAACAATTTCACAGTCTACACAGATCGCTTTGGAGATGTCTGTCCCATTTGTCTTCTTCTTTCCTCTTCATTATTTCTAAGGTGTTTTTCCACATACTTTTTCTTTTCCTTTTCCTTCATTTTCCGTTGCAATTCTTGATGATCTTATGTCTCGTGTTCATCGATTTTATGCCACTGCATTGCTAGAATTCCCTCTCCGTTTTGTTAGGTTACCGAGAAAATGAAATTCCAGAATTGGAATTTTAATGTTTCTTTCTGTTTTCCTCCGGTTTCTTAGCAACCAAACAAGCGGGCTGAAGGAGTGTCTGAGTGATAATTTTTGAGTAATGATTTTTGGTATTTGATGGTAGTGCTGAAGTCATTGAGTGTGATGGATTGGATGCTCATTGAGTCTTCAGAATTTTGAAATTTTCTCGACATTTTTTATGCAGAGATTCTTCAGATCTGGACTGAAGTCACGCTGAAAAGTGCCTTTTTATTAGGTACAACATCCTCGATTACTTTTTTTCCACGTGCTCTGTTGCAGATTCGTTTCTGGTTTTCTTAAATGTTAGGGATCGCATTGAATGCGATGTGATGTGTTCTGATTTATCTTTTCTCTGGCGTGATTTTCAGTTAAGTCCCTTAGAGGTTATAGAATTGTTGTAAGCC
>VvCYP51G1b  (1500 bp)
AGCTCAATATCTAAGCTTGAGTTAGGCTCGGGTTAAATAGAGTTCTGATTCGTTTTGGCAACTTTGTGTATAGTCATACTAATGAGAGAATAGAGGGTAATTCCAATGGCAGGGCAGGGAATCAGTTGTACAATGTGCCTATTTCCTCTTCTCTAAGTTCTCCCCCAAAATAGAATATGGTATGCCCTATGTGAGGGATCATCTTTATGTTGTTGATAGGATTAGTGTAAACAAACCTTACTTCTATGTATTAGTAAGTTATCATATAAAACAATATTAATAAAAGGCTTGGGCTATATTTGGTTCCCAAAAATTTTAGGGAAAATGCAAGGGAAAGAAAATAGAGAGGAAAAGTAGAAGGAAAGAAAAAGTGAAGGAAAATAAAAAATAGATTTAAAGTGAATAAAGTTTTTTTTTTTTGTATGTTACTTCGAACTCATTTCACTTATTTTAACACTTCTATATAAAGATCAAATAATTTGAAAATGTATAATTTTTTAACTAATTTGGATTATATTTTATTTTCTTTCATGTTTTCCATAGTAAAATCAAACCTAAGAATATCATTTTCCTTTAAATTTTTTTTCCTTAGTACTTTCCTAAAACCAAATATGGCATTTAAGTTTCAGTTGGGCTCTAGATGCATAGGTCATCCTGCCAGGCCCAACTAGACTGATGTTTGATAGATGCCCTAGAGCACAAGAATTATGGAAAACTATGCTCCTATCCAAAGGTTGGCTTGGTGGAGTTGAAATTGACCGTATTGTAGCTCTACCTCTTTACTAGAAATTTTGTAAGATAGTCATACTCTTGAACATACAATTTGATACAAGTCAAAACTTAAGAAGTCCTCATTGCCTTTGTTTGTTTGGAGACACCATTGGATGAGCAGCTTGTATAATTGATATAAACATGTTAAAGATGCAGTGAAGAACAAGATAAAGATATGTCTTAGAAACTAGGAATTATCCTAGGGTGGTTATACGTTTTTTATTTTTAAAAGAAAAATTATGTTATAACAAATCATAAAGTTGCAATTTCATGAAATCAATGAGTTATTTCTTCAAAAATTGATAATCTGGTATTGATGCAAAAAGGATTAGAAATGAATGAAAATGACTGTAGTATTTTGATTGGTAATTGGCCTCTTGGTTGTTACAAGTTGCTTTTATTTTATTTAAGATATTCTTTTTATAAGAAAATGAAAGTCTATAAGTATTTATATGAGTTGTATTAACAAAGTGAACCAAAATGAAGAAGAAATGAAAATAACCAAGATAGGATGTTGATTGATAAACTTGTAGCCATTACATTTCAATCTTATTTTTTAATTGTGGATAATTCATGGATTAGTTTTATTGCCTGGAATATGGTTGTGGAATACAATTGTTCGGTGCCGGAGCATTTTCTTTTGTAGTAGTGATGATTAATGTTCTGATTATCTTCTTTTGGGTTGATTTTTCAGTTTAGTGGCTCTAAATCTATAAAAGCATTCTATCA
> VvCYP701A3  (1500 bp)
TAATTTATTATTTAATTATATTTTTAAAATTTCAATAATAAATTATAATTTAATAATTTTTAATTAAAAAAAATTAATTAAAACCTTAGTTGACAACTGGCTTTAGTTCAAAAATGAAGTCCTAATTGGCAACGATGACATGGTGCTTATGCTGGCATCAAAGAGATCAATTTGAATATAAGTTTTAAAAAGTGGTTAGATATTATATATATATATATATATTTAATAAATGGGCATTTTGACCCAAAACTCCATTTTAAGAATGTTATCTTTATGTAAAGAAAGTTTTTTCTAGTGGATTATTTGATAGGAATCATAAAATGGTATTCTTATTAAGTAAGATATTCTTATTAACTACTCCCCAACTTTTCCTTTTGTGAAAGCACCATTTAAATGCATTACTATAAAACTGAAATATTTAATAGTTTGTGTAAGTAAATTTTGGGATTTTTTTTCTAAAAATAAAATATAAATATGCTAAAAGTGATAATAATTCTTAATATAAGAATTAATATATTTTAAAATTTTCAAATGCAAACCAGAAAAAGCCATTATCGAGAAACTTATTTGATAAGATATTAAATAAAAAATTAAAAAAATTCTAATCTTATTTGACAATGAATAATGAAAAAGAGTTAAAAAAAAAATTCAAATATATTAAGGTAGTAAAAAATATGTTAGGATAATAATTTCATTAAAAAAGTGAAAATAAAATAATAAAAGGAACAAATAAGTTTGAATGTTTAATAGATGTGATAAAATCAACAAATATAAATATTAATTAGATTTTATAAATTGTTTTATTTATTTTATGAAATCTTAATGTAATTATATTTGTGAGTAAAATTTATTAAAAAACCAAATAAAATTTATAAATATTTTTTACCTTATATTTATTTATAAGGAAATGCAATAACTTGTCGTTTTTTTTTTTTTGTGAAAATATTTTTTTTTTAAAAAAAGTACACGTAAATATTTAAAATAATTAAGGATGGTTAGGTGAAAAATATTTCTTCCCATTCAAGCAATTAGTTCTTTTCTATATACAACGTATGGGGGGGAACTTGGGCAGATGGCAACAGCCATTTGAAAAGTGCCAAATTTTTTTCCCCTGCAAAAATTTACAGATAAGCCTGGAATCCGAAGGTGGCCGCCAAACCCACCGCCTAATTGCTGTTGGAGACATAAACTAAGAGTCCCGAAGAGAAGAGACTAGCAACAGGGAATCGGCTTGCAGGAGAACAGCAACACTAGAAAGCAACAAAGGGACTTGCTCAAATAGGATTGGCTGTCTTGGAGGCATATTCCTGGCCTCTTCTTCCATTACAAAACGACAGAGCTCCGTTCTCTTTGGGTTATTTATTTATTTATTTATTTTATCAGCTGAGTGCTTCAGCGCCCTTACTGTTTTATCATTTTATACAGTGAAAAAGTTGTATGATTAGCGAGCCATTGCAAGTACCATAGGCATAGCAACAATCTCTATCCCCTGAAAAAGCG
>VvCYP703A2   (1500 bp)
CCAAAATCCATTTATCTTTCTTTTTCTTTTGTGAGTAGTTTGTGGGAGAATGTTTGGGAAGGGAGAAAGTAGTTTTCCTCCAAGAAAAATCAGTCCAGATATTTATTTCCAATTCAAACAAATCCATTAAAAATGGAAACCAAGTAAACCTTTAAATGATGGAGAAAAATTTATTGTTATTTTTATTTTAAATGAGTAGATTTTTATTTAATTAATTTTATAAAAGTATTATATTATAATAATTTTAATTTAAAAAAATTTGAAAATTTTAACTTCGTACTGACGTTACATTCAATATTGAGATTTTATTCTTGGTTAAAAAGGGGGTGGAGAGGACCACAAGCTTTTTCTTTTGGCCCACATTTCATTTTTCCTCCACACCCTTTTCATTACTCATTCCCGTTTGCTCACCTTTCTTTAAATACACTTGTTCCCATGTGTCCTTCTTTTCCGTTTAAAAGCACACCACACACTTCCAAATGGCTAATGGCTAATGTCGTTGATATTACGTGGCCTGGTCAAAGCCATACTCCATTCCATATCTATAAACCCTATTCGTTTCCGTGATTGGTGGCCCCCACTGAACTGTTTTGCGTCTACTTTACCGGATTAGAAATTTGGGAAAGCAGAAAAAAAACAAAATTATGCAGTACACGTGGCATTGGGTTATTGGTGAATTCTTGGGTAGTAGAGTCCAAACACCAAAATTAGGAACAGACCCACAATGGGTGGTGTTTGGTAAGCACGTTTCTTAGGCTCCAAATGGACTAAAGGCTTGGAGGTGGACTTCAATTTCTTTTACTTGAAAATCTAGTCAAAGGTGAGAATCTTGAACACTAATAATAATTATTAAGCCTAATTATAAAATAAATAAATATAATAATAATAATAAAATAACCATTTTTGGAATTTAAAGCAATTTATGAGTGATTTAAAGTAACCATTTTATTAAAAAGTAATTTAATAAAATGCTTAAATTCTTTCACAAAAGTATTTAATATTTCAATTTTTTTTTTAAATTGCCTTTTTCTCTTTTTCATCAATGACTGAATGATTCAAAGTTAATAACTTTGACTGAATATTTTGAATAATCTTCACTAAACTTTGATCACCTTTTTTCAAATAAGTGTTTTGAAAAAACATTGTAAGAAAGTATGTGGTCATGCACCCATTACTCTTCCTCTACCATGAATTCTCTTGTTAGGAAACACACTCATGCCGTTTCTTTGAAGTAGGAGAACATCATTCATCGCGTCCCCCACCAACCATGCTACCTACCAATGAAGACTTGACTTCAAGCCACATGGATGCGAACCCACCAATCTATGTTTGACATGTCAACCCGGTAACAAATCCATGCCAAGATCATGATGACCGATAAACCATTTTTAAATTCGACAATTTAGAGGGTTAAACAACCATAAATTGTTGTCCTAAGCTCCCATCTTCTCCAATATGGAATATAGGAATCTTGGGCTTAATTTTCTCTTGTGGGCTTCT
>VvCYP705A2   (527 bp)
AGAAGTAGAAGCCTAAAGAGCCAGGAAAGAGCAATAGAGAACTATCACCTTCTTATGCTGCTGCTGCTGCTGCTACTACTAATAAGAGAATAACCATTGAGATGAAGCACTTTTAGGTCTTTTTAACTTTGCTCTTGTATTTTTCCTATCTACTATTGTCTTTCCCACATTGCTTAGTTCATAATATGTATGGTCGCTTTTCTCTTGGTTTGCAGTATATCTTTCTCTCCAACCCCATCTTATTCTACTTCTTCCTCGTTTTCCTCTTAATAAATCATAGAAGATGACCCATTGATAATTTTGATTAGTCATGCTAATCAAATAATTTGAAAAATAAAAGACATACTCTAATAGCGATGATATGACTTCCAAAAAATTGGGAAAGGGACAACATGAAATCATGGTGCACTTGCATTTACCCTAAACAGTGTATGATGGGCAAACCATTGAATTATCCAATTATGATCTAGTCAGAGGCTCAAAAAAAATCTGAGCACCAAGTAAACATTAGCAGGAAGCAGAAGAAA
>VvCYP705A3a  (1500 bp)
CCTTATTTTTATAAAGCACTAAAAAATTATTTTTGTTCTTTAACTTAAAGGTATTATTTAAAAACAAGTTTCAGAAAATATGACTAAATGAGCTCTAAGGTACAAAATAATGAAATATAAGTACAAAGTAATAAAATTAACGTTCAAAACAATGAGATCTTGGTACAAAATAATGAGATTAAGGTATAAAATAATAAAATCAAGGTTCAAAGTCATAGGATTAACTATACAAAACAATGAGATCAAATATACAAAGGAATTGGACCCTTTTTTACCCCTTAGATCCAAATTACAAATTTATGGAAAGGAATGATTAATCTTGATAGCAATACTTGTAATTTTGGGAGCACTTACTTATTTTCTAAGCACTTTTAGTAATTTTGGGAATGGAATAACAATACTTGGGAGCGAAATTATGTTAAAAATTTGCCACCCCAAAAACTTAATTATATGAACAATATTTCAAATTTCCTATAATATTAGTAAATTTTATTGTTCAAATGATAGCATAGTCTTCTACATTAAATAAATGTTTTCTAATTTTTCTTTTAAGATAACATGAATGAAATATTTTTTATTATTATTATTTTTTTAACATAATATATGATTTGACCATTTTATTTTATTCTTATCTAAATAATTAATATGGTAAATAATTTTATTGTAAATAAATCTTATTCTTATCTAAATCATTATTGATTATGGTACACAAATTTTATTGCAAATAAATCTTATATAATCTATTATTATTAGTATTGGAATAATATTATGAAATATGCACTTTTAAAAATTTTATTTTCTTTGTGATAATTTTTAAATAAATTTTATGTTAATATTTTTTTTATATATATTGATAATGTTAATAAATCTATATGAATATTTTTTTTTCAAATTTGTTTTCTTTAAATTATTTTCTATTTCATTATTTTATTTTATAATATTTTAGTAAATAATTTTTTAATAAATAACTTTTATAAGAATATATTCTAAACTAAAATATATTGCAGATGGAAAATGATAAAGATGAAAAAGGAAAAAAAGAATATGAAAAGAAAAATGTAGAAACCGATGAGAGGAAGCATCGACCTTTTCTTTAAATTGAAGTGAGTGCGCATTTTCCTCATTCATAAATGGTCAATCTTTGTAGGCAGATTTTTGAGTGGAGATTCGTTTGTATTCATGTCTTTTTTTTATGATCCTATCATTTTCAAGATATAGCAATAGGCTATAAAATAAGAAACCCATTCATGTAGCTAATAATTGGCAGCCACCATCAATCATCTTTCTTATTTTATTATTTTATGTGCGACACAATCAGGTCACGGAGATCTACAAGTTCATCCTTTGAGGAGATGACCAAACAGCTTTATAATACAAGCCAAAAATGGCGGCAGCAGTGGCTTATTTTTAAAAGTTGTTAACAGGCTTAACTTAGAAGGTATCTCTTCTAAGAAACCTCTAACATTTATCTTCACTGATATTTGATTAATTTCTCTACTT
>VvCYP705A3b  (1500bp)
CCATAAATATGGAACAACTTCAGGCTACTTACCTAATTTAAGTCTCACTACTTTAACCTAATGTTATTATCAATGGATCATAATAAAATGCTTATTTATGAAGTTCTTTTAAATATGAATTGATTTCGGCATTATGCTATTTTATTTTTAAATTAAAGTGTTTAATTCTTCAAAGAAAGGGAATTCAATTATTGAATTAAATGAATGCTAATTGACATCTATTAAAAAAAAAATATGATTTCTTTTGGGATTTAATTTTGTATTATACTTAGTCCTTGTTATTGAACTATTTTTTTCTTACTAAATTATCAATCTCACTCTTCTTTATTATTCAAATTTTCAAGTTCAAATGATATCAATGAGGAGAAACTGAGATAAAAAGGGTGTTTCTATTATAAACAAATTTAGAATTGATTATTGAGGATTGTTGATTTAGGACTACATTCGGTTATGATTTCTAGCTATTATTTTTATTTAACCATTTTGGGAAAATTGTTGATTTTATTGTTGAGTTAATTAGTCTTGGATTAGAAATTTATGACTTTTCAATTATGCTCTACTTATTGTTTTGAATCAATTTGAGATAGTTGTTGGATAGCTACATGTTGGATTATTTAGTTAAGGTCATTCATGTGTTTGGTTCTCATATTTGACATGTAAAATGATCATGATACCCTTGACTCGAGGTTTGGGATTCGGGGACTCATAGAAACCCATGACATTTATCTTCATTGGTACTTTCCTCTCTTTTCCCATGGAGTTCCCTCTTCTTTTGGCCTTTTTGCCTTTCTTCTCCTTTTTTGTAAAAATAGGGAATAGATCCAAAGCCAACTTCTTAACTCAAAAGTCTCCCTTAATGCTAGCGAAACTACCTCTAATTGTGAACATGCATGAACCCATTATTATTTTCATAATTATTTGTTAAAGTGTGCATATTTTCTTCATAAAAGTCAGTGATCAGTTTTTTAGCACATATTTGAGAGTGATATATATATATATATAAAAGTTAATTTCACTCACCTCCTCTTACACCTTACCTTAGTCGATTTGAAATTTCATCAAATATCTTTTATATTTACAGTTAAAATGGAAATAAGTGAAAATAACAAATGAAAATGATAAGGAAAGTATTTGACCAAATTTCAAATCAATGAGGATTATGTATGTTTAGTAAAAATCTTAGAAAAAATAAATGAAATTAACCCAAAAACTATTCATGAATTGAACAATGGGCAAACCCCATCAATCACCTCACTCATGTGTAACATCATGCATAGACATGAGCCTCATCTTCATCCATAAGAAGACAACCAAAGAGTGGTTGGCAGCCACAATCACTTATTTTTGCAAGTTGCCAACGGGCATAAATTGAAGGCATCTCTACTAAGAAACCCATCACATTTAATCTTCACAGCTACTTTCTTTCTCTTTCTGCTCATGGACTTCCAATTCTCTTCTATCCTCTTTGCCTTTCTTCTCTTTCTGTACATGCTGTACAAA
>VvCYP71B10b  (1500 bp)
TGATTTTTTGAAAGTTGCCTTATTGCATATATATGGAAAAGCAAATTGAGAGAAAAATGTGAAAGCTTTTAGAGGTCATGGATGCATTGTAGCTTGAATGATTTTAATTAGGGGCCCATTAGCCCCTATTCCTGGGAGTGTTACTGCAATATTGAGTGGCATGATGCTTGTGTTGCTAAGATTCTAGTGAAATCTTGGGCCCTAGTTGGCTTTGGTGCGTGACATAACCACTGAAAACAACAAAATGTTTGTTGGTTTATATGGATGAAGTAAAATGAAGCACGACATTTGAAATGGGGCCACTAAAAGAGAACTCTTTATTAGGTAAGTGTTGGGAGTGCCGTCCACGTCTCATACATTTATGTTTTCGTTTTCCTTATTGAATGAAAAAGGATCTGAGATTTGACATTGCAATCTATGCAAAGTTCATCCTCATGAAACAACTTCATTTGCATTTTTTGCCTTAATTTCTTTATCATCTGGTCATATAAAATTGAACAATGCTCTAGCCACTAGAATTGACATCTCAACTCCGGATTTATAAGTTTCACTCAAGAAGTCCTGTAGATCTTCATGGATGTTAAATTGTGCTTGTTATAGATTTTCAATAAATTACTTCTCATTAATTTAGGTTATATTTGGTTGACAAAATTGAATAGATAAGGATAAAATATGTATATCCAAGGATATCATATTGATATCCTGAAATATATTGAATGATATATATATAAAACACATATTATTTTTAATATTTGAAATAAAAATTATACCATATTTTAATATTTTTTATTTAAAAAATTAAAAATTTTCTAATATTTAATAATATTCATGATTAAAATATTTAAGTTTTATAAATTAATAAAAAAAATTTATATTATGTTATTAAATATATAAAAATAATTTATAATTTACTTTGGATTCAATGGATCTCGGGATGGACAAAAATTATCTATATATTTGAGAGAATGTTCCAATGAAACTTTGGGTTAATACAAGGTATATCAAGTGAGAAAAAAAGGAAAAAAACAAAATAGGGTTTGAAAAAAAATGGGAAAGATATTTTAAAATTGGAAACTTCTTATTAAAATATTTGTTTTAAAAAAAATAAAAAAATGAAAGTTAGCTTCAAGATCGGCTCCGTGCACATGGAAATGTATGTATATGCCCTCGTATACATGAGAATGTATCCGCATGTTATGACTTGGAATGGGGACATTTGTAGACAAAAAAAAAAAAATTGTTTTATAAAGAAAATATATTTTTTCTTGCTTTGTATCACTTCACAAAATTTGTGGTAAAGAAAGAAAGAAAGAAAAGACAAATCTGTGCTTGTCGTTGCGAAACGTGGCATGTAATGCTATAGAATAAAAAAGGGGAAACGATAATTGGAAGGCCTGCTAGGACAAAATAGTGGTAGAAGTTGGAATTGGGGTTGAAGCCGATGATGTATGTGTATCCTAAGTACATCCCACCCAAGATTCATAGAGCGAGCAAGCTCCA
>VvCYP71B10c  (1500 bp)
TGATTTTTTGAAAGTTGCCTTATTGCATATATATGGAAAAGCAAATTGAGAGAAAAATGTGAAAGCTTTTAGAGGTCATGGATGCATTGTAGCTTGAATGATTTTAATTAGGGGCCCATTAGCCCCTATTCCTGGGAGTGTTACTGCAATATTGAGTGGCATGATGCTTGTGTTGCTAAGATTCTAGTGAAATCTTGGGCCCTAGTTGGCTTTGGTGCGTGACATAACCACTGAAAACAACAAAATGTTTGTTGGTTTATATGGATGAAGTAAAATGAAGCACGACATTTGAAATGGGGCCACTAAAAGAGAACTCTTTATTAGGTAAGTGTTGGGAGTGCCGTCCACGTCTCATACATTTATGTTTTCGTTTTCCTTATTGAATGAAAAAGGATCTGAGATTTGACATTGCAATCTATGCAAAGTTCATCCTCATGAAACAACTTCATTTGCATTTTTTGCCTTAATTTCTTTATCATCTGGTCATATAAAATTGAACAATGCTCTAGCCACTAGAATTGACATCTCAACTCCGGATTTATAAGTTTCACTCAAGAAGTCCTGTAGATCTTCATGGATGTTAAATTGTGCTTGTTATAGATTTTCAATAAATTACTTCTCATTAATTTAGGTTATATTTGGTTGACAAAATTGAATAGATAAGGATAAAATATGTATATCCAAGGATATCATATTGATATCCTGAAATATATTGAATGATATATATATAAAACACATATTATTTTTAATATTTGAAATAAAAATTATACCATATTTTAATATTTTTTATTTAAAAAATTAAAAATTTTCTAATATTTAATAATATTCATGATTAAAATATTTAAGTTTTATAAATTAATAAAAAAAATTTATATTATGTTATTAAATATATAAAAATAATTTATAATTTACTTTGGATTCAATGGATCTCGGGATGGACAAAAATTATCTATATATTTGAGAGAATGTTCCAATGAAACTTTGGGTTAATACAAGGTATATCAAGTGAGAAAAAAAGGAAAAAAACAAAATAGGGTTTGAAAAAAAATGGGAAAGATATTTTAAAATTGGAAACTTCTTATTAAAATATTTGTTTTAAAAAAAATAAAAAAATGAAAGTTAGCTTCAAGATCGGCTCCGTGCACATGGAAATGTATGTATATGCCCTCGTATACATGAGAATGTATCCGCATGTTATGACTTGGAATGGGGACATTTGTAGACAAAAAAAAAAAAATTGTTTTATAAAGAAAATATATTTTTTCTTGCTTTGTATCACTTCACAAAATTTGTGGTAAAGAAAGAAAGAAAGAAAAGACAAATCTGTGCTTGTCGTTGCGAAACGTGGCATGTAATGCTATAGAATAAAAAAGGGGAAACGATAATTGGAAGGCCTGCTAGGACAAAATAGTGGTAGAAGTTGGAATTGGGGTTGAAGCCGATGATGTATGTGTATCCTAAGTACATCCCACCCAAGATTCATAGAGCGAGCAAGCTCCA
>VvCYP71B10d  (1500 bp)
CATAAGGAAAGAATGATATAAGGAAAACATTCCTAATATCTCAACAAAAATTACCCTAAATAAAGGATTCGTTCATTATTTGAGTCACTTACAAAAACTACAAAGTGATATAACATTAAATTTCCTTGGCCGCTACAATATCATAAAAGAACAATTTTCTCTTTTGCCTTTCTTTTACATTCTAGACCATTCCTCTCATTACGGTCTTTCTTGTTGTAATTGAAATGCTTGGTTTTTCCTTGAAGTTTGGTATAGATCTCGACTTATCTTGCTTAAGGTTTTTTTTTTTCCTATTTACCTTCTAGCCAATTAATATTTATGTGAGGTTTTTTTTTTTTTTTTCTATTCTTAGACATTCAATTCTTGAAGTCCCTTGTATTTAATTATATCCCCATCTCCTTTATGGAATGAGTATTTCTATCATATATTACGGTATTCACAAGGTTCTTATAAAAACTTGGAAGGGAACACATCAAAATTTTTACTTATCTTTACCAATAATTTTGACATAATATTTCTTATGTCTATAATGGTTCTATCAAACTCATCAAAGTAGTCTTTAGTGGATATATCTTCTTTCGTTTAGATAGAAAATAATTACCCATTTAAATAGAAGACATTCATAAGAAACTTTACAATACATAGACTTTTTAACTTGAACCATAAACAATTGTATCATCTTTTGCAACCTTACAAAGTACCTTATTATCGAAGTATAGCATACCAAAACCATGTGCTTTCTATACAATGCATGTTTTCTCTTTAGAACTTCTAAACTTTTCAATGCTTTAGACAATCTTTGTGGATTAGGCTCACTCGTCTTTATGGGTGGCTCGAGAGGCGGACTTCCTATGAATTGGATGGTTTCTACTAGCAGGTGATTGGACTCCATGATCTGAAAGATGTAAAGGAAGATTTCATCGATGTGCTGCTGCAAACAGAAAGGGATGTGCGGTTCAGCTAAATAAAGATCATATTAAAGCAACCCTCATGGTGAGCCGCAAACAAGCTCCTTAGTCCTAAATGAAAAGTGACATCAATCATTGCTTTTGCAAATAAAGGTAAGAAATAGTTACCCTTTGATTTTTTGAAAGTTGCGTTATCGCATATATATGGAAAAGCAAGTTGAGGGAAAAATGTGAAAGCTTTTAGAGGTCATGGATGCATTGCAGCTTGAATATTTTTAATTAGGGGCCCATTAGCCCCTATTCGTGGGAGTGTTACTGCAATATTGAGTGGCATGATGCTTGTGTTGCTAAGATTCTAGTGAAATCTTGGGCCCCAGTTGGCTTTGGTGCGTGACATAACCACTGAAAACAACAAAATGCTGGTTGGTTTATATGGATGAAGTAAAATGAAGCACGACATTTGAAATGGGGCCACTAAAAGAGAACTCTATATTAGGTAAGTGTTAGGAGTGTCGTCCACGTCTCATAGAGCGATGATATATGTGTATCCTAAGTACATCCCACCCAAGATTCATAGAGCGAGCAAGCTCCA
>VvCYP71B10e  (1500 bp)
CATAAGGAAAGAATGATATAAGGAAAACATTCCTAATATCTCAACAAAAATTACCCTAAATAAAGGATTCGTTCATTATTTGAGTCACTTACAAAAACTACAAAGTGATATAACATTAAATTTCCTTGGCCGCTACAATATCATAAAAGAACAATTTTCTCTTTTGCCTTTCTTTTACATTCTAGACCATTCCTCTCATTACGGTCTTTCTTGTTGTAATTGAAATGCTTGGTTTTTCCTTGAAGTTTGGTATAGATCTCGACTTATCTTGCTTAAGGTTTTTTTTTTTCCTATTTACCTTCTAGCCAATTAATATTTATGTGAGGTTTTTTTTTTTTTTTTCTATTCTTAGACATTCAATTCTTGAAGTCCCTTGTATTTAATTATATCCCCATCTCCTTTATGGAATGAGTATTTCTATCATATATTACGGTATTCACAAGGTTCTTATAAAAACTTGGAAGGGAACACATCAAAATTTTTACTTATCTTTACCAATAATTTTGACATAATATTTCTTATGTCTATAATGGTTCTATCAAACTCATCAAAGTAGTCTTTAGTGGATATATCTTCTTTCGTTTAGATAGAAAATAATTACCCATTTAAATAGAAGACATTCATAAGAAACTTTACAATACATAGACTTTTTAACTTGAACCATAAACAATTGTATCATCTTTTGCAACCTTACAAAGTACCTTATTATCGAAGTATAGCATACCAAAACCATGTGCTTTCTATACAATGCATGTTTTCTCTTTAGAACTTCTAAACTTTTCAATGCTTTAGACAATCTTTGTGGATTAGGCTCACTCGTCTTTATGGGTGGCTCGAGAGGCGGACTTCCTATGAATTGGATGGTTTCTACTAGCAGGTGATTGGACTCCATGATCTGAAAGATGTAAAGGAAGATTTCATCGATGTGCTGCTGCAAACAGAAAGGGATGTGCGGTTCAGCTAAATAAAGATCATATTAAAGCAACCCTCATGGTGAGCCGCAAACAAGCTCCTTAGTCCTAAATGAAAAGTGACATCAATCATTGCTTTTGCAAATAAAGGTAAGAAATAGTTACCCTTTGATTTTTTGAAAGTTGCGTTATCGCATATATATGGAAAAGCAAGTTGAGGGAAAAATGTGAAAGCTTTTAGAGGTCATGGATGCATTGCAGCTTGAATATTTTTAATTAGGGGCCCATTAGCCCCTATTCGTGGGAGTGTTACTGCAATATTGAGTGGCATGATGCTTGTGTTGCTAAGATTCTAGTGAAATCTTGGGCCCCAGTTGGCTTTGGTGCGTGACATAACCACTGAAAACAACAAAATGCTGGTTGGTTTATATGGATGAAGTAAAATGAAGCACGACATTTGAAATGGGGCCACTAAAAGAGAACTCTATATTAGGTAAGTGTTAGGAGTGTCGTCCACGTCTCATAGAGCGATGATATATGTGTATCCTAAGTACATCCCACCCAAGATTCATAGAGCGAGCAAGCTCCA
>VvCYP71B24a  (1500 bp)
ACCAATTGACATGCTCTCATCAGTGGTTTATAACTTGTAGTTGGATCTCCTAATATTCTATTGCATATATATGCATTTATGTGTATCAGATTCTTCATATCTAGTGGGTTGAATTTTGGAAAATGACCCAATTGAGAAGCTCTATCACATGGGCTTTTACTCATGTCATCTTTTATTATTTAATAAACAAACATATTTTATTATTTATTAAATTTAAAAAACTAAAATAATAATCTTATTTAAATAACATTTCTAACTCTTATCAAACTAAAATAAATATGTTTTTCTTTCATGTCTTTTTTTTTTTTCATGCTTTGATATTGATATGAAAGTGGAGACATTTGAAACAAAAAATAGGTTTTAATGTTGTGACATCTATTATAATTAAAAAATAAGCATATTTTAAATTAAAAATTAAATTTTAAATCTAGTAGATATTAATTTTATCATCATTATTATTTATTGTGATGAATATTTTTTATTTTAATTAAAAATAATAATGGAAAAAATAATGTGATTGAGATTTTCTTTTTTCTTTTTAAAAAATATATTAATTTGTTCAAATAAGTATAATTATTTTATACTACATAATTTCTTTATTTTTCACTTTTCCAATGTGCTATGAGAAAATTCTAATTTTGAGGAAAAAAATGAATTTTATAATCATTAACAATAATTAAAAATAATTATTTAGGAATGCTTTTTATTTTATATAAATAAAAAAATTATTTATAGAAAAAGAAAAGGAGAAAAGAGTTGATAAAATTAATATAAATAAAGAAGTTATTGCAAATCTCTTCTCTACTCCACACAACGGGAAGATAGATAAGAGTTAAAAAAGACATGAGATTTTTCAGAGATACGTACTAAGCATTTTCTCTCTTCTAGTATCTTCAACTTCGCTATTTCGTGGCGCATTTACCATTTTCTCCTTATCGATGTGGATTAAAATAATAGATTCACAACAGTTTTGATGAATTTGAGGAAAGGATGACAGTCTAATAAATATCTAAAACGTTAAGTGTAAAAAAAATTGTCCCAACAAACCTGCACATCACACCTCATCGTGGTATATATCTTCTACACACACCTATATATACACGGCGTGAGCCCATTAGGGACATGTGGAGGGTTCCATTTTAATAAAGTTACCTTTTGACAATAGTGATCATTGCATTTTGAATACACCTCTCAACACTTGGAAAATTAATCTTCCTATGAACTTAAATTCCAATATATAATTCATTTATAGCACCATCATCAAGCTCATTCATTGAATACAATTATTAGATAATAGCGTCCCTACATGGTAAGGGAAGGCGGCTACGTGAAAAACGAGGGCGCAGTAGAGATGGTCCTAGATTCCCAGCTTGCAGAAAGAAGAGTCCAAGGGGTGAGCCTACCGAGAAGAGGAAAAATTAGAAGGATGACGGCATGTCTTCAATCTTCACCTCTAAATAGAATTCTATATATCCAAATAAAAGCACACCTTATCCCTCA
>VvCYP71A14a  (1500 bp)
AAACCTGGTAAGAAATGGAGAAATGGGAGATACTTTCTATATGAAAAATGGTCACATAAAAGCTTTGGGTTTCTAGATGACACATGCCAATTATTAAAAGGAGATCATTTATATTTATACAAATAAAATTTTAGAAATTTAGACAATGAGCTTCTTCCGATAACACGTATTTACTTTCTCCCATTCAAAAATTTATTTATTTTTAAATAGAAAATATTAAAATATGATAATTTTATTTTAAACATTAAAAATAATATATATTCTATATTTTTTATTCATTTTATTAATTAAATATAATATAATATAATATAATATATTTCATATATTATTTTAAAATATCATGTTATATGTATATTTAAGAATATTATATCCTACTAGAAATTATATCCTAAGATATATATTTCCTATTTAATGAGATATGATATCCCACGAGATATATATATATATATATATATATATATGCTAGAGTTTGAAGAATTCCTAAAGGATCGACATATCCTATTTAATGGGATATGATATCTCAGGATATATATATATATATATATATATATATATATATATATGCTAGAGTTTGAAGAATTCCCAAAGGATTAGCATATTCAAGTCCATCCCTATAGATATTTCTTTTTCTAACCACACAATTGCTAGCACAATTATTGTAATTCCCAATATAGGAGTAAAAATAAGTACAAGCATCCATATGATCCCATAAACCTCTTTGAGTATTCCAATCGGGATAAAGAATTGATGTCTTGTACTTTTTGTGTATCAATTATCATTTCAACAATCAACTTCCCCCATAATTATATCTATTCTACTTAGTATTATTATAATGTCAGCGAATTTCATTCTTTTAACTAACTAAGGAAGAATTTGCAAATTGATAAAACTCGGCAATCGAATTTTCCATCTCAAAGGAAAAACATTTTGATCTCCTATCAGAAAAATTCCTAACTCTCCCTTTGGGGCTTTGACTCTCACATAAAGTTCTTGTTTTCTATTTATTAAGCTGAAAAAGATTATTCATGAAGCAAATTATTATTATTATTATTATGAATTTTTTCAGAAACATACTAAAAGAACAATATCTCATTTATTTAAGCTCTTCAATCATTTAAAAAGAAATTTGAATCATACAAAATGAGAAAAGAATGTCGTATAGAGGAAGAAATAATATGCTTCGTTGTTTTGTTTTTCCAGTCGGTAGTAAAGAAGAAAATGTTGACCGGATGAATGTGGGTTCTTCGTTGTCTACAGAGCAGTGGAGCCACACCCGAAGGAGACCATGGCAGTCCTTCAAATTTAAGGGTATATGAAACTCAGGCCGGCACCCCGGTCAATTTGCGCATCATCGCATTTTAAGGAGATTTATAACTTATCTGCATACTTCTCTGTCTTCTTCCATTTCTTTCTTCTATAAATACGTGTTCGCTCATCCATTCATTTGCACAAACACTTGCAAGAAACTAGCAAGGAAGAAGTAAAACACACACTGGGAAA
>VvCYP71A22  (1500 bp)
GGATTTTTGGAAAAGGGGAATGGGATTTTTAGAATTTGATGGTGCTTTATGTGGTGTCCAAGTGGCACCTATGTGGCAAAATCTAAGATATTTTTATCAATATTTTTTTAAGTGCATTTGTAAAAAAACTGTTTTTTTCTTAAAATATTATATTTTTATCAAAAATCCCTAAAAGAGGTAGGACCCGAACTTCTTGGCATGAAGATGGATCATCTGTCTTCAAGACTAACAAATCAAATATTAATTGAAGGACCTGATTTTAATTTATTAAGTTACCAATCTAATTTTAAATTTAATTATATAAATTTGGAAGGGGAAAATTGTGTTTTGGACCCAACTAGGCCCAAAAATTAAGATTTGGCCCATAAAAGTTACATAATTGAGGGAAAGGATATAAAATATGAAGAGACCAATATATCCTTCAAAACTATTTTGAGTATTTTCTACCATAATGTTTGACAAACTTTTTTAGCTTAATTTTTTTTAAATAATTATTCTAAAAATTTATTATTTTTAGAAAACTAATTTTAAAAAATATATATTCTAAAAATATATCATTTAAAAAAAATAAATTTGACATATTTTTAGTTATTTTTTATATACACAATTTTAAAAATATATATTTTCCAAGATGTTTTATTTTTAAATAATAATAATAATAATAATAATAATAATAATTTATTTTTATTTTTTTGGAAAATGGTGTATTTTTTTTTCAAATAACTAAATTAAATTAAATTTTATTGAGATTTACAAAAAGAATAAAATTTAAATTAATGTTTTTCTACTTTTTTTTTTTTCATAGTCAATAAAGATCATTTTTTGAAAGATAAAAAGTTCATATCCTTCTCAATTTTCACACTTCCTTTAGGTATTAAGCTTAAATGGTGAATTTATATGGATCAAAACTTAATTTTTAGGTCCACTTAAATCCAAAACACAATTGTCCCTTTTATCTAATACCTCTTTGACAGATGAGAGAGTTCAGAGACGTAAAACAGAAACACACCATTGAAATCAAGTGCAGTCCTGGCGACGTACTGCTTATCAAATAATAGGGAACACACCAGTTCAACCGGGCCACGGTTCTCCATTTGTAAGATCCTAGAAATGACCAATACGACTTTTTCTAGCCGCAAATTGATTACCAATTGGAATTGAACACTATCAAATTATGCACCACCTCATAATTTGGACTTTAAGCGATGTCCATTTTTATATTTTTTTTAGTTCACATCAGAGATGAGTGGGTGAATGGGTAGATACTTTACTCTGAAGGAGTCTCTTTGATACCAGTCATTGATGATAATACTTTTGAGCGACTTTGTTTTACATCTTTCGACTTTTGGTAAAAGGTTTTGCACAAGCTGATCAACTTTAGTGGGATTTGCCACGTGTGGACATGGATACGTGTTTCGGTAGCTTCCTGCTGCATATAAACCAAGGAAGATCCCAGAACTTGCGATAGAACGCACGCATTTAGATACACACAAAAAGAAA
>VvCYP71B4  (1500 bp)
ATCTGTTTATAATATGTATACACACATTACACATCCGCAACCACACATAAAAGATGGAATGTTTGACAAGAATGGGGGGCACCCATATTAGAAAAAAAAAAAAAACAAACAAATAAGCATAGTCGATTGACATGCCATTCTATTGTCACAACAAAGTCACTTGACAGAATTAGCATTGTAGGACTTGACAAAAAACACTAAAGAACCAAAAAGGGGATCGATGGATGATCACACAGTGTAGGACTCCAATGGTAGGTACGTAGTAGCAAGTCATAGACCAAAAGCAAGCCAAATTGCACGTTTCTAATCCATAAACATAGTAGACTTTTATGATCAACAACAAGAAAAAACAGCTAGTGGCAAACAAAAAGTGGCAGAAAAAGATCTGAATATGAGGCTACATATATGCTTTGGTTGTGGATTTAGCTGGCCCCAACTAAAACTATGTTACTAGATATCACTTTTCTTGTATTAATGTTTGACTCTTTGAAGAAGCTCAAATTAAGAAGTAAAAAGAAGAATTGCTTTTTCATCAAGAAAAAAAAAATCATTTTTTTAAGAACTTGAGAAAAACAAAATTATTTTTACGAAGATAAAAAATTCAGTTTTCTATTAAGATAAAATTTTCTTGAAAAAGTGACAAGTGAAAAAGTAACACCTTGAAAATGTTTCAGTCTAAAAACAAGTTGCTTCAAAGCTCATTGATTTTCTAAAATTGAATTTATGTTAAAAAAGATAACCCTAGATTTCTAAAAAAAAAAAAAGATATAACCTCAATTAGATATAAATACCTTGGTTATATTTTTAATAATTACTTTGATCTAAAATAGATATAAAAAAATTGATAATGAATATTTTTGTTCAAAAATAATTATTTTCCATATTTTCATAAAGTGAAAAGTTATTTTACATCTTGGAATCAAATAACCTAAATTAAACAAACTTTCTTGAAAATGCCACCACTTTGGGTCAGAAATTTACCAGTCATATACAAGAATTTGACTAATACTTGATAAAAGACGGAACACCTACCATTTGAATGAAGTATGAATCTATGGCGGACAGAAATTGAAAGTGTAATTGATCCACATAAACGGCCAGTATCATTCAGTCTGCTAGTGCTTATAATCGAACTAGTCACATATTTGGAATGAAGAAACCAAGAAAAGAATGGTGTACCATCAGATAAATAATCTTCCTGTCAAGCTTCTAAATACCCCACTAGGCAAATAAGCCAGAGAGAATGCCGTGTAAAGACTCATACTTACCATGTTGGAGTTTTCCTTGAAGTTGCTTTCATATATCACAGGTGAGATCTATAATAGTGATGTTTTAGTTGACATGGTAAAGCATTTAATCCACTAATATCAGATTGGGAAAGGCATCTTTATTAATGATACAAGGATACCCCATGACCAAGCAGAACTCCAAGGCACAGTTTTTCCGGAAGAGGTAAGACAGTAAAGACTATCCTCTCTACTGATCATTTCTATTCTCCTC
>VvCYP71B24b  (1500 bp)
AAAATTATCCCTTGAAGAGACGATTTATTTCTCAATTTTTTTTTTGTTTTTCTTTTTAAATCGTCTCTTTGAGAGACAATTTCTCATATAAAAAATGTAATTTTATAAATTGTGTATTGGAAAAATGATTTTTTTTAATAATTTTTTTTAAAAATTCATAAATCATCATTTGAAAAGAGATTTTTTACTTATAATTTATTTTCTTTTTCCTATTTGGACAAAACTACAATAGATTTAAAATTATTTTTCCTACCACGATAATTTAGTAATTATTTTTTAAAACTGCCATACTCTTATAAAAAATTGAGAGGAGCATGCAAAAATACAAATGCTTGCATCCTAGAGTTTAAGTCCAAAATAATCCATTGGTAGAAAAAAAATGGTAAGAATAGTACCCATCTCAAAATATTTGTCAAACTAATCTTTTTGCATCCATGTAAGTATCCACATAGATTTTTTTTTCTAAATGTATAAAACCACCATTAATGATTGTGGTTTTAAAAGTTTCATAAATATCCTTAAAACCACAGTCTGTGACTGTGGTTTTACAATTCTCCTTAAAACCACAGTTAGTAACTGCGGTTTCAAAATTATTTTTAGTTCATCCATGTTTTAATGGTATTATGATTTTAATATTATTTTTAAAATATTTTTTTATCATAATAATCATAAAAACCACCGTTATTAAGGAATAACCTAAAATCATAATCATTGACATTAATTTTTATATGAAAATATAAAATTTTAAAATAATATAAATAATTTATTTAATTATTTTAAAATTTAAAAATAATATGAAAAAATAATTTTCTTTAATTNNNNNNNNNNNNNNNNNNNNNNNNNNNNNNNNNNNNNNNNNNNNNNNNNNNNNNNNNNNNNNNNNNNNNNNNNNNNNNNNNNNNNNNNNNNNNNNNNNNNTAAATAAATTATTTATATTATTTTAAAATTTTATATTTTTATATAAAAATTAATGTCAATGATTATGATTTTAGGTTATTCCTTAATAACGGTGGTTTTATGGTTATCATGATAAAAAAATATTTTAAAAATAATATTAAAATTATAATACCATTAAAACATGGATGAACTAAAAATAATTTTAAAATCACAGTTACTAACTGTGGAAAATTGTAAAACCATAGTTACATACTGTGGTTTTGAGGATATTTATGAAACTTTTAAAACTACAGTCACTAATGATGGTTTTATACACTTAAAAAAAATTTATGTGGATGTTTAGGTGAATACAAAAAGATTAATTTGATAAATATTTTGAGATGAATACTATTCTTACCATTTTTTTCTACCAATGGATTTTGGACTTAAACTCTCCATCCTAGGTAGCTTTCTTTGATGATAGAGAAATATGTAAATATTAAAATAAGATTGATACGATACGACAAGAATCCAATCCAGAATTATATTATATAGGCTTCATCTTTTGCCCATTCCTTACATAGCAGTATAGCACTAACTCATAGCAGCGAAGATCTTCACACC
>VvCYP71B24c  (1500 bp)
AAAATTATCCCTTGAAGAGACGATTTATTTCTCAATTTTTTTTTTGTTTTTCTTTTTAAATCGTCTCTTTGAGAGACAATTTCTCATATAAAAAATGTAATTTTATAAATTGTGTATTGGAAAAATGATTTTTTTTAATAATTTTTTTTAAAAATTCATAAATCATCATTTGAAAAGAGATTTTTTACTTATAATTTATTTTCTTTTTCCTATTTGGACAAAACTACAATAGATTTAAAATTATTTTTCCTACCACGATAATTTAGTAATTATTTTTTAAAACTGCCATACTCTTATAAAAAATTGAGAGGAGCATGCAAAAATACAAATGCTTGCATCCTAGAGTTTAAGTCCAAAATAATCCATTGGTAGAAAAAAAATGGTAAGAATAGTACCCATCTCAAAATATTTGTCAAACTAATCTTTTTGCATCCATGTAAGTATCCACATAGATTTTTTTTTCTAAATGTATAAAACCACCATTAATGATTGTGGTTTTAAAAGTTTCATAAATATCCTTAAAACCACAGTCTGTGACTGTGGTTTTACAATTCTCCTTAAAACCACAGTTAGTAACTGCGGTTTCAAAATTATTTTTAGTTCATCCATGTTTTAATGGTATTATGATTTTAATATTATTTTTAAAATATTTTTTTATCATAATAATCATAAAAACCACCGTTATTAAGGAATAACCTAAAATCATAATCATTGACATTAATTTTTATATGAAAATATAAAATTTTAAAATAATATAAATAATTTATTTAATTATTTTAAAATTTAAAAATAATATGAAAAAATAATTTTCTTTAATTNNNNNNNNNNNNNNNNNNNNNNNNNNNNNNNNNNNNNNNNNNNNNNNNNNNNNNNNNNNNNNNNNNNNNNNNNNNNNNNNNNNNNNNNNNNNNNNNNNNNTAAATAAATTATTTATATTATTTTAAAATTTTATATTTTTATATAAAAATTAATGTCAATGATTATGATTTTAGGTTATTCCTTAATAACGGTGGTTTTATGGTTATCATGATAAAAAAATATTTTAAAAATAATATTAAAATTATAATACCATTAAAACATGGATGAACTAAAAATAATTTTAAAATCACAGTTACTAACTGTGGAAAATTGTAAAACCATAGTTACATACTGTGGTTTTGAGGATATTTATGAAACTTTTAAAACTACAGTCACTAATGATGGTTTTATACACTTAAAAAAAATTTATGTGGATGTTTAGGTGAATACAAAAAGATTAATTTGATAAATATTTTGAGATGAATACTATTCTTACCATTTTTTTCTACCAATGGATTTTGGACTTAAACTCTCCATCCTAGGTAGCTTTCTTTGATGATAGAGAAATATGTAAATATTAAAATAAGATTGATACGATACGACAAGAATCCAATCCAGAATTATATTATATAGGCTTCATCTTTTGCCCATTCCTTACATAGCAGTATAGCACTAACTCATAGCAGCGAAGATCTTCACACC
>VvCYP71B3a  (1500 bp)
TTGTACTCAAATATTGCCCTCAGGTTTATTCAAAATTATGGACTCACGGCTATTGTCTTCACGATCGTCGCCCTCCAGGTATTGCAATGTTGACCAGCATGATAAGTACATTTTTAATTTTCTGAGCACTAAGAGAGTCTTACTGAAGACAAGGCAGTGACGAAGAGATTTCTGGCCTTATCCTAAGATTCCTAAGATTTTAGAAAAATAATACAATAATTTTAAAAATTATTATATTTTATATTTTATTTATATTAATTTTAATATTCAATATCTTTTTTATAATATTAATGACAATTACCCTGATGACACCTATCCCATTTATAATTTATGTTTGACATGCACGTTGTCTTGTATGGTAAATTTAAGGGTTTACATGTTTTAAAATTAAGGCCCTGCTTGTTGAGATCTGCTCTAGTATATCTCCACGTACTGAATTCTTGGGTCGATGAAAATTGGTATTTCCCCTGCTATTTATGATCATTGTATATCATGCACTGTCATAACCAACCCATGGAGTTTCCATATGGGTGAGGACTTGGGAAAGAAGAGCCCGCAAAAATATAAAAGCATGCATCCTACCTAGCTTTCTTTGATGATAGTGAAAGAGCCCGCAAAAATACAAAAGCATGCATCCTAGCTAGCTTTCTTTGATGATAGAGAAATATGGAAATATTAATATAGAGGTGACGAAATCTTATAAGCTTGGTGAACACGAATCATACTCAATACCTTTTATATGGTTTCAAGTCGAGTATAATAGGATTTGAATCAAATTCATATCAATCAATATATATAACATGTTTAGTAAATAGTTACATAAGATGTTTTTTGTAGACGCATTAAGAATGTTTGACAATATTTTTATTCGAAGTATTTTTAGAAAAAATATTTTTTTCTAAAAGTGTTTTAAAGAGAATTATCTCTAAAGCATTTTTCCAAAAAATAGTATAATTAATTTTTCTACCAATGCAAATGATTTTCTTAAAACCATTTTAAGAAAAAATAATTTCACTAAAAATACTTGTAGTAGAAACATTATCAAACATACTCTAATTGTATAAATTCATACAAGATTTCACTTAGGGTTCATTTGATAGTGATTTTAAAAAGTATTTTTAATCTAAAAAATATTTTTGAAAAAAAATTAGATGTTTGATAAAATTTAAAAAACTCTTTTAAAAATCTGAAAAATCACATGATAGTATTTGAAAATTACTTGTAATATTTTACGAAAAAACACTTGATATGTGATTTTTTAAAAAATATTTCAAGAGAAAATAGTTTAGTGTAAAAATATCTGTCGAATCTATTTTTAATCTTATTATTAAATAGGAGGTTAGTAGTATTTAAATTTATGATTATGGGGTGAAGTTTGGATTTAGCAATGTGACAGTATCTAGGCTTCACGATGCACTTGCACGAATTATATTATATAGGATTCATCTTCTGCACATTCCTTACATAGCACAAACTCACAGCAGCGAAGATCTTCACACC
>VvCYP71B23  (1500 bp)
AATGTATCAATTTAATTTTTTATTTATTATTATATTTTGCATATATCATAAAAAAATGTTATTGATTTTTTTAAAAGTTTCCATATTTTTCATTTTATATAAAAATATTATGGTTTAATATTGTTAAAAGAAAATTGGTATTATAAAATTATTGTCCTATATATTTATTTTTTAAAGTTTAAATTCAAAAACCATAGTCACTACGGTTTCATGTTTCCCTCTTGAGTCCAAAGACTATTGCTTGGCTGTAAGATCTGTTTGTCAGATATGATGGTGTTATCAATTGTGTTTTTATCTAAGTAAACAAATAATAATCCTGCCAATAAAGGGAACTCCAACTATCCTACAAATAATAATCCTACCAACAACATACTCCAACGTATCCTTCATTTAGGGCATCACATTGGCAGTGGTGAAGTACATGAATAAAGAAGAATAAAAAAATTGAAGAGACAGCAAGCATCGGGAAAATTCTGCTAAAAAAAGTTTCGGGTCTTGCAGAATTGCATTCGTCGTGCAGCGAGCTTGACCATATGCCTTGGATATTGCGCTGGTCTATCCAAGCTTGACCACGTTAAACATACCCAATACGTACATAATTTTCTGTGGTCCCTGCCATGGAAGATCCTAACATTGGCAACTTGTACCAGTTTGTTGTTGGTTGTATGCTTTCATTTGTCTACTACACCAATCCGTGAGCTCTTCACTTGCCCTAACTTTACCGACAGTACATCCATCAAAGTGTAATTTGTTCAATTGTTGTTGAAAAGTTACTATGTTCTTGAAAAGGTAATATTAATGTTGGGTGGGGGAAGAAAAGAAACAAAGAGAGGTGGTTCGAACCTAGCTTCTTGCCAAACCGAGATCCGAGATCGGATGTCATATTAAACTACCACTTTCCCTAAAGCTTAAACTTACAAGATTTGAATTCAATATACATGTCGTACTTCTTGATAATTAGGTATATATTCAAATTTCATTATTTATTTTTTATTTCAATCTTGTTTGTTTGTACCTTTATATTTTCATGATCCCCATTTATTTCAATCGTATTTCAACGGTTTAGAGTTCATCATATACATTAAAAATATGATCCCCATTTATTTCAACCGTATTTCAACAGTTTAGAGTTCATCATATACATTAAAAAATAGTCCGGATCTAGGGTTCAATAGGCATTGTTAGGGTAGCTTAGCATTTTCCAAAAGATACACAATTTGAGATTTGCAGTCTTTTAACTTTCACGGTATATAATTCAACCTTTATACGTATTCCAAGGATTAGATTACATTATCTGGTGGTATGGCATCAACCTAAGGCATCTTAGTTTGAAAATAGAGTTGATTCTACCAAGGCAACTAAAAAACAAAACTTAAAATACTAAACAGAATCTTGCATGTGAAGTCCTCCAAGGCTCCAAAGCATAAAAGAGGATGAAAATGGAGCTTCACCCATAAGCCAATAACACTCTAATCCATTCTACTACTCCCCAAGTTCTTC
>VvCYP71A14b  (1500 bp)
CCTATGTTTTTCAAGCAACATCATTGATATGTTTTTCCCAGAAATCTGTTGGAAAAGAATTGGGAGAATCATTTCTAAAACACAACATTCTCTGCCCAAACCTACAGCATGGAGTCAAGAAAGGGACAGATGGAAACTGATTTCTGCATTCTCCACACCTATTGATATTGGAGAGTTATAGATATCTATAGCAATGAAGGAATATAAAATTGTTGTATAAGAATGAATACACTCCATTGTTGTACGGTAAAACTACAGTAAAGGAGGCTTTCCAGTACTATTTCCCGGCCGTACTCAAATTTCCTAGACACCCACTGATGTAAGACTAATAAATCCAAGCTTAACCAACTTACTTCTTCCAACAGTTCCTGTCCATGATTAATTGTTCAATATGCAGTCTTCATAGCAGACAAGGCAACAAACAACAATCCCATATTATCGATTAATCGGTTTTTACTACCTAGCTAAGAGATCGCTCTTTGGAGAAATGGAAATCAAGACATTCCCCTAAGTATAATTCATCCCACATTACCCACCAATATATGACCTTTTTTTTTTCCTGGTGTGTGATTGGTCTCCTTATGAAGCAGCCAAATATCCCAGGGAGAAAACGAGGGATAAAATACTATCAAGGCCTTATAGCAGGAAAGCAGGACCAACAGTAGCAATACTCTATTAACCAGTTGCAATTTCATATACAATCAAATACAGACAATCCTATTATACAATGCACTAAAGAATTATCAGTTTCAAAGTAGATAAAATGGTTCCTCGCCTTTAAATCCATTTGTTTATGTATTAGATTAGGTTGGTTCTTCTGTTCTATCATTGCATTGAATCCAACACTTCAGTTATGGCTATGATATATAGAAATATCAGAAAATTAAAAACCAAAAATTATAAGTGAAATTTAAATGTCGACCTATCTCGAAATTATAGGATATCTGAATGCTGATCAGTGTAGAACTCGATTTTTATATTTTTAGTGGACATTTTCGTAAATTTATTTTGAAAAAACCTACTCCAAATTTTAAAGTAATTGGTGAGTCTTAAGAGTCAATAGGATTGAAGAGACTACTTGAGTGAAGGAAGGAGAGGTTTTTATTATAGTTGTCATCCCTATCATTGCATAAAAATCTTCTTACTATCATTTTGAGGTATAATAGAAATGCAATAATTTCAAAACGTTAACGAATGGCATTGATTTTCAATCCATTCAAGCACTAAAAATCAAAGAGGGGCCTTTTCAAATGACACCGTCATTGACAGGAGATCTGGATGATTGATTCTTTATTAGCCCCTCTTTCATTACAAGGATTTTTATCAGCAATATCCGCAACTACAATTCAAAGTGGGTGGACCAGTTGAATTCGACAGATCTATAATCTATTATAGGATTGTAAATGGCTGAATTCTCCTTTAACTCCATCTTCCATTATAAGAAGGCTCCTGCACAAACAATTTTTGCACGGCAAAAACCAGCTTTGTTTCATCAAATTA
>VvCYP71B3b  (1500 bp)
TCAACTATGTTGAAAAGTTGGTAGTGCAAATGAGTAGTCAAAAATGCTGATTTGAAATTCATTTTCAATTGTATTGGACCGTCCTAGATGGTGACAAATGTGGATAATGATCACAATACAGTAGACAAAATAAATGTCACGTCATCAAGCAATCTTGAAAGTTAAGAAAAAAAATTTCCAAAGATATTTTACCACTCATTCCATCTCAAACCGTAAATTAATTTATTTAAGAAGTTGTGAAAATTAGTTAAACTATTTACAATTCCTCCAAGAATAATTCTAGTTAAAGGGTATTTGATCTTCAACATTTTTTATTGGAACAACTTTAACAAAAATATTTTTAAGAAAATTTAGCGTAGTAGCATGGTTGATAGTAATTTCAAGAAGTATTTATTATTTTTTTAATATTTAAACTTTTTTATTTTTTAAGTATTAAAAGGGATAAAAACATTTTTTAAAATCATTGTCAAATAAATTCTAAATTGCATTTGATAGTAATTTTAGGAAGTATTTTTAATCTTTTTAACACTTAAAATTTTTATCTTTCAAATACCAAAAAAACTAGAAACACTTCCTAAAATTATCGCAAAATACACTCTTAAAATACGTTTGACAATGATTCTAGGAAGTGTTTATAACACTTGAAAATTTTTATCTTTCAAGTATTAAAAATGTTAAAAACGCTTTCTAGAATCACTCTCAAATGTACTTTTAGAGTGTATTTAACAGTGATTCTTGAAAGTATTTATAATATTTTTAATACTTGTAAGATAAAGTGTGGTTAACAGTAATTCTTAAGTTTGAAAGCATTTCTAGTATTTTTAATACTTACAATATAAAATTTTTCAAGCATTAGAAGGTGAGAAGCGCTTTCTTAAATCATTATCAAACAGACTCTTAAAGTCCGTTTGATAGTAATTTTAAAAAGGACTTATAATATTTTTAACACTTGAAAAATTTTATTATTCAAGTGTTACAAAGATTATAAACATTTTCTAAAAAAATTTCGATCTTTATAACTTTGACACTATCCAAACCTTATCTCCAACTTAAAATAAAATTAAATAAAAAAGTTTGTGTTAAAATTTTAATTAAAAATAAATTCTTCCATTAAAATTAAACAGTACATAGTTCCGTAAGAATAGGGGTAATTTTGTTCATGTACATCTTCATAGACTTCAAACCAATTTTATACCATCAATTTCTAAAGATCTTAAGATACAACATGAAATAACATATTGACAAGTTTATGGTCAAAAAAGACGATTGCCAACCCATCTTGAAATTGGTTTTCAACGTGACTAGATGTTCCAATTAACATATGTTCTGCCTTAGGATTTCAAGATATTTTGCTCATTTTCGAAGGAATGATGGGGACTCAGAGGGTTGGCGAACGCAGTCGAGAAGAAAAAAATAGTGGTTAATTTGAAATGTTTATAAAGTGACCAAAGATGGCGCTTGTGCTGAGAAACTAACAGCATCAACTTCACTGCTTTCTCC
>VvCYP71B3c  (1500 bp)
TGATGGTTGGATTTTAAGTCAGAGATATTTTTGTACTATCCATTCACAATTATTGTTTACGCATTTAGACTAGTATTTTTAAAATATATTGTATAAAATATTTGAGTGATTTTAATGGTTGTCATTGATGATTGGATCTTAGGAGTGAGATATTTTTGTACCATGCATTTACAATTATTTTTTGAATCATTTATCTTTATACTTTTCGACTAATATTTTTAAGATATATTATATAAAATATTTGAGTGATTTTAATGGTTGCCAATTATCATTGACTTTTAGTTGTGAGACATTTATGTTCTATTCCTTCATAATTATGTTTTTTTGAGTTACTTGAATGGTTACTTATGATCATTGAATTGTAGCTGTGGGAGTACTATCCCTCAAAAATTATCTTTTGAATTGAGTGCAAATATTTTTAGCACATGTTTGAGAATGAATTCATTTCAATTCATCTATCACCTTTCTTATCATCCAACTATGAAAGTTTGCAAACTCACCATCATTACATACCTTTCTTATCATTCAACTAAACAACATTTAAGCTTTATAATATATATGTAATATGGGTTGGGCTACATTGTATGGTACTTTTTTTTTTTTATCCCTAAAAAATATATCATCAATTTGATGTTGTCATGTACATAATTTTGTATTTTATTATTTATATTGTAATTCCATTTATTTATATCTTTATACTTTAATCTCATTTATTTTTACCATACATTGTCTAATGACTTATATTTGATCAAGCATTTTCAATGATTCGGATTTTTTATTTAATAGTTCCATTATGGTACCTTAGTATTAAAAAAAAAAAAAAAACCTTGGAAAGTACAATGACTTAGATTTAACCGTTGCCCACAAAATTAAATTGAAGGCATCTTTTCTAAGAAACTGTGACATCTATACATAGTATTTACAGATATATGGGTAATTTGGATATTAATTTAATTCCTTTTTTTTAAAAAAAAAAAAGAAAGAAAATAAGTGAGATATTTTTGGAATGTTGAATTAATGAAATATATTAATCAAAGAAAATTAAAAACACAAGTAGCCAAGTAGTTAACTGGACTGTGGGATTTGTTGAAATCTCCAGAGTGTTTGACCTTGGAACAAGGCCTCTGGGGGAGCCTGCAGGTAGAAACGAGTGAAGAGGCTAAATTAATAAAAAGGGCTATGGGTTACTGGATGAAGTGAGGAAAAAGCAAGGGAAATAGGAAATTAATAATGAGACAGGAAAATAATAAAGTATTAATGAGATCTTGGGTTGTGGGCCAGCAGGGAAAAGTAAAAGTAATTAATCAAATGAAAACTTGTGGCCAATATGATGCGATAGGACATGCATCAGACATGAGCCTCATGTTCATCCATACGAAGTTAGCAGCCAGAATGACTTATTTTTTGAAGTTGCCAGCGTGCTTAAATTGAAGGCATCTCTAGCAAGAAATCAACCCGTCACATTCTATCTTCACAGCTACTTTCTTTCTCTTTCTGCTC
>VvCYP71B10i  (1500 bp)
TATTACAAATAATATCATAATTGATCCTCAACTCATGAGGAGGTGACTATCTTTGTGGTTTTGTAATCTAGTAGGACACAACTAGAACATTATGTCTGTATGAGATGGTGATTTTAATATCTCGCTGAATAAACGAAAAAGTTATTAATGTTATATATTCATGAATTCCTTTAAATTGTAGATAGTGACTAGTGCTATACTCCTTTAAATGTTAGATGTATTGTAAAATTGTAAGGATATCTTTAAACTCAAAGCTAACAATACCTGTCCAAACTAGGGATGACAATGGGACGGGTTTTTTTGGATACTCGTCCTATCCCGCTCCTAATAGGACAGGATTCAATTTTAATAAACGGGTTTGGGATTTTTTTTAAAAAAACCTAGGGCGGGTTCGGGTATTGCCCCGTCCCACCCCAATTATATATAAAATTAATTTAATTCAAATTTTAAAATTAATTTAATTTAATTTTTATTTTACTATTTTTAGTGTATAGATAATAATAAAATAAGTTATAAAAAAAATATAATAATTTAATTATTTATAAAATATACTTATTTTAATATAATTAAAAATTTTAAAAGTAATTTAAAAATATATATTAAATTAAAAAAAAAAAAGTTAAACTACCCGCCCTACCCGTTTAATTTTTTAAATGGAAAGGAGATAAGAATTATTTCTAATCAACGGGCCCATTGCCATCCCCAGCCCAAACCCAATATTCCTTGCATTTGAAACAGGCTCAGTCTTATCCACAATGCCCATTTGCATGCTTCTGGAATCTAGATCCATATTTATTGTAGATAATATTACTCAAATCTCTTGTCCGCCGGTGAAGCCAAATCCCATTTTATGATCCATTCCTGGCTGTCCACGTTTGTTCTTGGGGAAAATTGTGGTCACAGTGAACAGGTCTTTGAAAGGGATTACCATTGTCTTGTTTCTTTCTTAGGAAATCTTATCTACTGTATTTAAATTGAGAAGAAATTTTTGTAGTTTTGTTTAATTCATTGAAAAGACGCTTATTGCTTTATTGAAAATTAATGTTCGTATGCCTATTTTTAGGAGTAGCTTTATAGTTTTGTTTGTATTACTATTTCATTCATTGAACATTCCCGTCAATGGATGGATACTTTTCACAAGTGGCCCCTTTTGTTCTGTGACTCTTCCCTAGATATCAGTTCTGTCAAGAGAGAAAAAAGAGAGGGACTCTCTTATCCACGTAATCGATCAGCTGCCTGACTCCAATCATTTAGCCAAACCCAAATTTTTGTTGTTATGATCCAACCACTACAGTCCCTTTTACATCTGTGACAAACTGCCAATTAAGTATTAACATTAATTAGGCTTCCGAAGCAGGTCCATTGGATGATAGGCTACGCTCATCGGCCAACGCAAATCAAATACTGCATCTGATAGCCCAGTGCCATTGAGGAGAGACTCCTTCAACATTTTTGCATATCAAAGACTCTCAGCAGCTCCCCAAACCCCCTCAAACCGTG
>VvCYP71B10j  (1500 bp)
ATCCGCCCGTAGGGTGGTGATGACCCTGTTGCCATCTAAATATCATCATGACAACATAAAATATCTCCCCACCATTAATGAGAGGAACAGTACTCCTGGCACTATATATAAACCTTCACACGAAGAGGAAGGTAATCTCCTGATACCTAGTAAAAGGCCAACTGATTTATATCTCCCTCTCTAACCATGGCTAACAAAACCATCGGAGGGTGGGTCCGGACACCCTGTCCGGATGTCTTTTACAGGTATAACGACTGAATCAAGAACCTTTGTGGGTTGAGATTGCGTGTCCATCCATTTGGCAACTACGTGGAACACCAGGAGCACGAGGTATCAACAAGTTGTAGAAAATTAAGGCGTCGAAATTTTGAAAAGGGAAAAGTATGACTCGATATTTTATCCAGATATTTGCTTGAGTTACTTTGTAATTTTCTTGTCTCACTTGGTCAATCAACATCGCTGTAGAGTTTGTTTCGTCCTTCTCAGTCTGGCACATATTTCACGGGTCTTGGCACATATTTCACGGGTGGTAGGTATTCACAAAAAACCACCTCTGTCTAGCTCCTGTTTCTATTGTCACGTCCGGAAGATGATCACTTTGATATCTTCAACTCTTCTCTGTTTGTTTAGGATTCACCCACAGCGCAAAATCATCGTACGTTGTTCTTCCTATAACACAAGATGGTTCATTAAGCAGCCTGTATGCATCTGATCAAATTAACCTTTGGAACAATAGACCGAGCCCAATTGCATCTATAGTTGTAAGAATGAGCAGGCCAGCCCAAACCCAATGTTCCTTTGCAATTGTAACAGACCCAACAATGTCAATGTGCATGATTCTGGATTCAAATTATTCTAAATAATATTATTCAAGTCTCCTGTCGGTGGAGCCAAGTCCCATTTTAGGGTCCAGTCCTCACCGTCCACGTTTGTTCTTGTGGAAATTGTGGACAGATCCTTGAAAGGAATTGCCGTTGTCCTATTACTTGATTGAGAAATTTTTGAGAAGGTTTCTAGTTTTATTTGTCCTAACTTTTCCTTCATTGAACATTCACATTAATTGATGGATAATTTTCACAAGTGGTCCTTTAATTTCTGTACCTCCTCTTTAGGTATTTATTCTGTCACGACAGAAACAGAGGGGTGGCTTATAATCACTTCTTATTCATCACGTAATCGATCAGTCTGATTCCATTCATTTGGCCAAGCCAAATTTGTGTTGTTATGATCCTAACCACTAGAGTCCATTTCACAGAACAACCCGATCTGTGACAAACTGCCAATTAAGCATTAGCAGTAGGCTTTCTGAAGCAGGTCCATGATTTCAATGATTTCATCAATCAGCCCTTTGGATGATAGGCCACGCTCACTGGTCAACACAAATCAAATACTGCAGCTGATAGTCCATTGCCGTTGAGAAGTGTATTTAAATTTTAAAGAGACTCCTTCAACATTTTTACATATCACATACTCTCAGTAGCTCCCCAAACACCCCAAACC
>VvCYP71B10k  (1500 bp)
ATCCGCCCGTAGGGTGGTGATGACCCTGTTGCCATCTAAATATCATCATGACAACATAAAATATCTCCCCACCATTAATGAGAGGAACAGTACTCCTGGCACTATATATAAACCTTCACACGAAGAGGAAGGTAATCTCCTGATACCTAGTAAAAGGCCAACTGATTTATATCTCCCTCTCTAACCATGGCTAACAAAACCATCGGAGGGTGGGTCCGGACACCCTGTCCGGATGTCTTTTACAGGTATAACGACTGAATCAAGAACCTTTGTGGGTTGAGATTGCGTGTCCATCCATTTGGCAACTACGTGGAACACCAGGAGCACGAGGTATCAACAAGTTGTAGAAAATTAAGGCGTCGAAATTTTGAAAAGGGAAAAGTATGACTCGATATTTTATCCAGATATTTGCTTGAGTTACTTTGTAATTTTCTTGTCTCACTTGGTCAATCAACATCGCTGTAGAGTTTGTTTCGTCCTTCTCAGTCTGGCACATATTTCACGGGTCTTGGCACATATTTCACGGGTGGTAGGTATTCACAAAAAACCACCTCTGTCTAGCTCCTGTTTCTATTGTCACGTCCGGAAGATGATCACTTTGATATCTTCAACTCTTCTCTGTTTGTTTAGGATTCACCCACAGCGCAAAATCATCGTACGTTGTTCTTCCTATAACACAAGATGGTTCATTAAGCAGCCTGTATGCATCTGATCAAATTAACCTTTGGAACAATAGACCGAGCCCAATTGCATCTATAGTTGTAAGAATGAGCAGGCCAGCCCAAACCCAATGTTCCTTTGCAATTGTAACAGACCCAACAATGTCAATGTGCATGATTCTGGATTCAAATTATTCTAAATAATATTATTCAAGTCTCCTGTCGGTGGAGCCAAGTCCCATTTTAGGGTCCAGTCCTCACCGTCCACGTTTGTTCTTGTGGAAATTGTGGACAGATCCTTGAAAGGAATTGCCGTTGTCCTATTACTTGATTGAGAAATTTTTGAGAAGGTTTCTAGTTTTATTTGTCCTAACTTTTCCTTCATTGAACATTCACATTAATTGATGGATAATTTTCACAAGTGGTCCTTTAATTTCTGTACCTCCTCTTTAGGTATTTATTCTGTCACGACAGAAACAGAGGGGTGGCTTATAATCACTTCTTATTCATCACGTAATCGATCAGTCTGATTCCATTCATTTGGCCAAGCCAAATTTGTGTTGTTATGATCCTAACCACTAGAGTCCATTTCACAGAACAACCCGATCTGTGACAAACTGCCAATTAAGCATTAGCAGTAGGCTTTCTGAAGCAGGTCCATGATTTCAATGATTTCATCAATCAGCCCTTTGGATGATAGGCCACGCTCACTGGTCAACACAAATCAAATACTGCAGCTGATAGTCCATTGCCGTTGAGAAGTGTATTTAAATTTTAAAGAGACTCCTTCAACATTTTTACATATCACATACTCTCAGTAGCTCCCCAAACACCCCAAACC
>VvCYP712A1a��864 bp��
CTTTCAGCCACTTTCTTGCACTCAGCCCGATTTCTTATCAGCTTGATGTTTTTTTCGTTTTCTCCTTCTGATGGGTTGTGGGTTTGTTGTACATAGCAGTTTGGAGGAGGACGAGGAGGAGAGAAAAGCCAAAGGCTTCATCAAGAAGAGCACAAGGTAGATGTTTGGGAGGTGGGATTCTTATTAGAGGCTAGTAGTGAACATTTGATGAGGGCCAACCAAACCAACATGGGGACGCTCGTTAAAGGAGGTTAATGGCTGCGCATATTTTGCCATATGGCCTCCTAACCTTCATGAAAAGATGCTGTATAATACCAATTTGAATTCAATCATCCCTATATTAATAATACCAAGAAAGATCAATTTGAATTCACATTTGATGATGGTTTGACCTATATTAACTAGATATTAATTGATTTTAAGATGAAACCCAATCCAAAATTTGTTATAAGAATATGGAGTTATAGGTTCCAGCATCATGTAATGACTCCTCTTAAGTCAGGGAATAAATCACTCAAGTGATGGCTGATTTCAACTAATGTCTTTTTTTTATATGATATTTGGATGTCAAAATCTCCGGGAAAAGGACATTCAAAGAAACCCTTGATTAGAAGTTACAAAAACAGCAAACTAAAAAAACCTAGCTGATAATGGCTCAAGCAATTTTTTAAGAAAGAAGGGTGGGTCAGATTCTCCTGTGTAGAGAAGACAAGAAGAAAAGCACCAGCACTACCCATATATGCATATGATGTCATGGCGTCAATACACCTCATCCGAACAGTATCTTCACTCTCCGACACCATATATCTACTGTTTCTGCCCTGCAAAGGATGAAGAAAACCATATAGTTTCCTTGCCAAGGCC
>VvCYP73A5a  (1500 bp)
TCTTATTTGTACTTCTCCAACAAAATCTCCATCTTTTTTAAAGTTTTATAATAATAATAAAAAAAAGAGGAGTTGATGTAGTCCATGCCGTTCGTTTAAAAATTAAAGCTTTTTGAATATCAAATTTATGGAGTGTAAAGGTTGAAAAGGGAAAAAGATCAAAAGTGTCATTGTCCGACATAAACTTAAAAATATTACATTTGCTTTGAATTTTCAAAGTTTCGGGCCTGGCAAAGATGCTATTGATTTCGTGCATGAGTAAGCCTTGTTTGTTCGAGTAATTGTAATTGTAATTGGCCAATTTTAGGCCCATCAGAGGCATTTCTGATGGCATTTGGCTGACTTTATTCCTATCAAATTGGCTTAATTTACACAACAATGTTTAGTGCCATGGGAAGGCAACCACTTAGATTTAATGTAAAAGCCAAAAAAAGGGGCAAAAAAAAGAGAGTGAGTCAGAGTTAGATTATTGTCCGAACCTAGTTAAAATTTTCAATTGATTGAATATTAAATAATTAATTATCTAGCAATTTTGTTCAAGAATTTACCTTGATTATCAAAAAATTAAAAATAGAAATATTTATGAAAAGGATTTGAGAATTACAAATTTATTGATATATGTAGTGGAAATATAATTTTAAATAATTTATTAATTTTAAATTTATTTTTTATTTTCATTGATTTTTTAGAAATCAAATATAGTAGAAGAGTGGGATCTTAAAATTGAATTGATTTAGATTTAGGACTTGAGTTTAACAAGTGAGTTGAATCTCAAAATTTTTATATTTATCTTAATTTCAGGTGGAATAGATTAAAAGGAATTATCCAATTATTATTCTAAATAATTTGAAGAATGGAAAATATTGAATGTCACAAGTATTAATGGTAGGAAATCCATGATGCAACGAATAAGGAAACCGTGGCAAATCCTCCTCAGCCTCAAAACCAAATTCCCCGCAATTCACCAGTCACTGCCACATAATGTTATAGGACCCACTATTACTAACTGGCGCAAGCAGTAATTGGATGAGATTTTAAAACTCCTTGTGCACGAAAACTATTTAAACAAAATTATTATAATGTGTAGTGCTAGAACATATGAGTAGGTTGGTCACGTGAAAAAATAAAATGAGAGCCATTGGATTAGAAGGATAGTTGGAGTGTGGTGGGGGTACGCAGAGGATAGGAGCTCCTTCACTTTGAAAGGTCCATCAATTTGACGCTTTCGCTCCACCCACCCCCTTACCTACTCCCTTCAAACTCGTCACCCTGAATCTGGCGGACCTACCCCTCAAAAGCGCCGTCACATTTCACGCCGTCAATATAGGACTCTCACCCACTCCCTCGCACTCGCCTACTCCCACCTAACGATTCCCGTCAGCCCGAGCCGGCGCTATTGCTTCACTCATTTCCCTATATAAGCCCATCACTACACCCACCATCAACCATATCCACCATCCGCCACCCACCAGCCCTCAGGCACCATCCACCGCCACAACC
>VvCYP73A5b  (1500 bp)
GGGTCATGTTTTCAAAGGTCAAACAAATAGCACGGTGGAGATGGTGGCAGGCTCCACCATTCTTGAACTCAAAACTCACACGTTTTTCACTTGTATCTTTTTTGAAGACTGACCAAAGTTTTCACTGATTTCTCATTTTTCATAACTAGCGCCACCTTTTCTTTGGGAGAGGAGGCTTCAGCCTTGTCCAAAAGGTTAATTTTGGAATATACTGTCACTAGGGCTAAACACTTTGCATGCAATATTTATTACTTACAATTAGGAATGGCAACGGGGCGGGTTTGGGACGGGTCGCCCCCATCCCAACCCCACCCCGTTTATTAAAATTAATTCCCATCCCCGTCCCATTTAAAAATTTAAACGGGGCGGGGCGGGGAAATTCCCAAACCCGCCCCGCCCCGCCCCGTTTAGCCTCCTTTTTTTAAAAAAAAAATAAAATTTGCTTTTAAAATTTTTAATTACATTAAAACAAATATATTTATAAATAATAAAATTATTATATTTTTTATAACTTATTTTATTAATTTTTTTATTATTATCTATATATTAAAAATAGTAAAATAAAATTAATTTTAAATTTTAAATTAAATTAAATTTTAAAATTGATTTTATATGTAAACGGGGCGGGGCGGGGCGGGGCGGGTACCCGAAAAAACCCGCCCCGTTGCCATCCCTACTTACAATAAAGATATTGAATATTTTTTACTTGACAATTGAATATTATAATATTTTTATTTAATAAAATAAAAAATATTAACGCCTTTATATTTTATCTTTATCACAATGTAATATTGATAATATCAAAGATAAAATGATGAAATATTTTAATTTTTTTAATTATTTATATATAATTTTAACTTTTTATCGTGATTTAAGTCTTAACCGTACCATTAAATTGTCATCGGGTAATTTTTCTAATTCAGTAATCGGTTCCGAATATACCCGTTATACCCATCATTTTAACATATTTCAATTTTATTCTAAAGCATTCATGAAATACAAAAAATTGACTAGTAAAAAAATGTGATCATATGCATCTCAGCCAAGATTGTCTTATTACTTACATTCAAAAACATGCTCACTCTATTTATGCTGATGCAAGCAAAGACTTGAAGGTGGAAGAGGCGTAGCAATTATTTTATTTTGCTGACATGGCCAGGATATGGGGCATCCGAAACCTTGTTTTTCCTTTCAATCAATTATAAAATGGGAAAAAACCGAGATGATTCAGCAGATAGCAAATTGGTCCAAGCTGGAGGCACTCCACCAACCAACCAGTCAACCACCCCATTTTTTTGACTTGAACAAGGGATTAATGCATTCTCCTACCCTGATTCCAAGAGGGCCCATAGATTTTCTCAAAACCATTGCACCACCAACTCTACCAACCCTCACGAGTTGTCAGTTGTCACTCCTCTGTGTATATATATATAGCTCCATCCGCTCCTCTCTACTCAATCCACAGATTGCATACACACAAAAGAAGGGGAAGAAAAAAAC
>VvCYP73A5c  (1500 bp)
CAGGCCCTAGTAGACTTGAGCGGCGAGTGTCAACTTGGTCCCATTCCATGTCAATGACTAGTTGGAGCTCGGGAGTTGAAAACCCATTAACTACCTTGTATTTGGTTCATAGATCAACAAATATATCGAAGGTGTATGCATGGGTCCAACTTGGTAAGTTCTACTACCCTATGGTCTTTAATTTTTAAGATACGCACTCATGTGTTTTGCCTGGTTCAACTTTTGAACCGTCTTATCCCTTAACCACCTTTGAACCGGTGAATTGGTCGACCAGAACCAGCGGGTCAGCCGACCAAACCGGTGGGTCATGTTTTCAAACGTCAAGAAAATAGCATGGTGGAGCCGGTGGCAGGCTCCACCATTTTTGAACTCAAACCCGCACATTTTTCACTTGTTTCTTTTTGGAAAACTAACCAAAGTTTTAACTGATTTCGTACTTTTCATAACTAGCGCCACCTTTTCTTTGGGAGAGGAGGCTTCACCCTTGTCCAAAAGGTTAATTTTGGAATATACTGTCACTAGGCTAAACGTTTTGTGGGCTATATTTCTTACTTACTATTGGATATTGAATATTTTGGCATAATAAAATTCGATTCCCTTATATTTACTTCACAATTGAATATTATAATTTTTTTATTTAATAAAATAAAAAATATTAATGTCTTTATATTTCATGATTTAATATTGATAATATGGAAGATAATTTTTTTAATTATTTATATATAATTTAAATTTTTTTATAATTATTTTCAATTTAAGACTTCATGCAAAAGTCATGATTTAAGTTTTAATCCCATTACCAAACCGTGGAATAATTTTTCTAATTCAATAATCGAATTTTGATTATATTAGTTATACCCATTATTTTCGCATATTTCAATTTTATTCCAAAGCATTCATAAAATATAAGAAATTGATTAGTCAAATAAATGTGCCCATATTTATCTCAGCCTTGTTTACATTCAAAAACATGATCAGTCTATTTATGCTGATGCAAGCAAAGACTTAATGGCGGAAGAGGCATAGCAATTATTTTATTTCGTTGACATAGCCAGGATATATAGGGCATCCGAAACCCCGTCTGCAAACTTCTTGTTGTAATCAATATGGGACTGTTGTATTGGTTAGGAATCGTCTGCAAAACGATTTGCAAGGAAACGCGAAGTTTTGTCTTTCTTTTCAAATTTCAATCATTATAAAATGGGAAAAAACTGAGATGATTGAGCAGTTAGCAAATTGGTTTAAGGAAGAGGCACTCCACCTACCAATTAAGCGCCCCATTTTTTTGACTTGAACAGGGGATTAATAATTCATCCTCCTACCCTGATTCCAAGAGAGCCCATAGATTTTCTCAAAACCACTGCACCACCAACTCTACCAACCCGCCAAGAGTCGCCTCTCCATGTATATATATATATATAGCTCCATCCCCTCCTCTGAACTCAATCCATAGATTCCATAGATTCCATACACACAAAAGGAGAAGGTGAAGAAAAAACC
>VvCYP75B1a  (1500 bp)
AAAACTCAACTCATTTATATATTACAAAAGTTGAACTTCATTTATTATTCATTTTAAATAAAATATTATTAAAAATTATTATTATTCATTTTCAACCAAAAGAAATTTACGAAATTATGTTTGTAACATATACTAAAATATCATTTTTTATAAATAATATAATTTATAATTTTATTATAATATTATTATTTATATTTTAATAACTATTTATTTTTTAATTTATTTGTAATTACAAGACTATTTTCATTTTAATAAAACTTAAATTTAATTTAATTTATATTATATAAATTGAATTGATAATGTTTTTACAAAACCAAAACAAAAAAATTATCTTTAAAAATAATTTATCCAAACAAGTTTTTTTGTTTTTTATTTTTAAAAACAACTTATTAAACACCCTTTTTTTTTTTTATAAAAATAAAAAAATAAAAAATCTTGTTTTTTAATTTGAAAACAGTTTTTAAAATCAAGTTTTCAAAAATATTGCCAAGTGGCTCTAATGTCCCGCTCCCTCAATTTCTATAAAATAAAACAATTATACAACCTTCTAACGATCGACTCAATGGAAATTTATGATGATCAGAAGTACTATAATATTCTAAGATCCCATTTGATAGTGATTTTAGAAAATGTTTTTAATCTTTCTAATATTTAAATTTTTTTTATCATTCAAGTGTTTAAAAATTTTTGTAAAATCACTACCAAACATACTTAAACTTATCCAAATTATATTATCGGTTAATTTCTTTTCATCCTTATCACTATTAAGTGAAAAGAGTCACATCCAAATATGGAAAATTCTCTCCAAATATTAAAATATATATTTTTTAAACTACATTTAAAATATGATACGAAATAAATAGTAGATAATTTAATACATGCATGCACCCTGGGTTCCTAGAATAACCTCCTTTCTAAGGAAATGAGATGTTCTACTTCTAATACAGCCATGGACCAAATTAATGTTCCTTTCTTGGAAAAATATTTATTTATTTATTTATTATGAAATTAGTTTTATATAAGTTTGAATGCATATGCAATGCAACTACCATATTCAGTCACTTATGACATACTACCTCTAAAATGACTATTAACCAATTTCTTGATCTGTTTTATTCCACAATTTCAGTCTTATTTTTGAATATTCATATTTTAAATTAATTATTAAATTTGTATTTTATGAGGGGTCATTCTTCTCCCTTTCTTGGTTTCATGTTAGGGAAGGCGAGTCAAATTTAGGGATTTGATTTTGTAATTTAAAAAAAAAGGGAAAAAGGGGACAAGTCAAATATAGGAAATTTGATGGGAATCTGGTGAGGGCCGGGGGAGCTACCATTCTTGTGGTGCAGTTTTCAGCTACCACACCACGCACGGGGCACGCTCTTAGTCAGAACTTAGAACACACTTGTACCTGCCATCTTTGATTTAGCTAACCCCGAATCCCCCTTTATATTCCTCTCTGGATTCAGGAGCGGAGACTCAGAGATAAGCCAAGAAGCC
>VvCYP76C1a  (1500 bp)
TAATGAAATAAAGTGTTTGACTCTAGATTTTATGGCCCTAGTTATAATTATTGAGATTATTGACCCTAATCAACGGGTTATAATAGTTGATATTATATGGCCCTAGTCAACGAATTATAATAGTTGACATTTGGTTTTGTTCACCTTAAATGGAACAAATTTGAAACTAACCACTCATTTGTAAAGTCCTACATAACTGGACCCCATATTTGTTATTTGATAACCAGAGTAAAAATATTTTGAATGCATTTAATTTGGTTTTGATGAGAAATTGTTTTGAAATGACTATGAGAAAGTTTTGTTGAAAAGTTTGAATGTATTAGCATTTTGAACTCAGAAGTTTTTATGAAAATAAGTATATGTTATATCTTCTATTTGTAAACATGATTGAAAATGTTTAATCCATGAAATTGTATTAATGTTCCTTATTGGGCTTTGAACTCATCCCTCTTTGTTGATAATCTTCCAAGTAATCTTAGTTCGGGCGAGGAATGACCGTTAGGAAGGAAATTTGGCTTTATTAGGACATTTGTTTAAACTCTCTTTATTTTGGACATTGTTTAGATGTTAAAGCTTAATTCTCATTTGAATTATTTTGAGTTTAGAGTTATTTGGACAATAGCATTTTGGTTGATGTATTAGTTTTTTATTTTTATTTTTAAAGTTGATACTTAAAGATTTTAGAATTTTGTCATACTACTCTAAATAGGAATTTTGTAATTGGTAAATTTCCAATTACAATATGAATGTTTATGTCGTTTTCACTTTGAGCTTTTGGGTTTGAGGTGTGAAATGACTGTCATGTAAAATGATAATATAACGAACCATATTATTTTGGGTCCAACACACCCGTTAATTCGAAGAATTCAATGTAAGCGAGGCAACATGATCTCATACCTACCCCATTTTGAGTGTGGATCGGAAATAGGAATATGTATAAACAATTTACCTGGAATTGTGAGGATGAGGAAGATCTGTCGACTTCCCTATTTGAATCCTTGGTAGGTGAAATTGGATTGCCAGCCATTGATGACTAGTACTGGGTCAAATGCTGAGTTCATGTGATCTTTGGTCAGGCTTGTCATTATCCTCCGCTGAGCTGCCCATTTTGGCATTGCTAGTCTGGGATTTTAAATATTTTTTACTTCTCTAGATGGGACCTTCTTGTCCGTTTTCTCTTTTTCACCTACTCAACTTTTTTGCGTTGTTGACTATTTTTGGCCCATAAATTCACATTCACAAGCTTTCTATTATGTAATTCCATCTCTAAGATCGTATTTGATGGATTATTCCCTTTTATTTTACATGATTGTTTGACTTTTCTAAGCAGATCAATCAGTGAAGCATACAAGGCGGCTAAAAATGTGCTTGATTTTATAAATGTTGAGAAATCATACCACTATGTGGTGTTCAACAATTCATGGGTAACAAATAGAGTTATTTATCTCTTTGCCTGGACCTCAATTTAAACCTTCTCCCTGGGACGAGGCGCGGAGAGAG
>VvCYP76C1b  (1500 bp)
GTGTAGCTGAGGGGTACCCATGTCATCTCCTGATCTCCGGTTCAAATCCTTGCAGGTGGGAATTTTTTTTTTTTCTTTGTTCTCTGGCACTGTTCGGCTTGCTCGCGTTAGCAATGAGTGAATGACTAAAATCCATACATTCATCCATCAAAGATAGCAAAGAACCACACAAAGTCTAGCACGTCTCCACTAATAAGTACAGCATGAAAGACAAAAAAAAAGACAATAAATCAACACATCATCTATGGAAACAAATACATGCGTAACGTTTAAGTTACTATCATTCAAAATATTTTTCTTTTTGTTTTTTTTTTTAAAAAGAGTCAAATTAGTAGGAGATGTTTTGCTTTTTTCTGTTTAAAGAAAGGAAAGTCGAGCAATAGTTAGACTTTGGACATGAAACTTTTATACAAAATTCACTGAATCAACCGATTTTACAGTATAGACAATTAAAAATTTAAAAGGATCGATTGAGACGCCCTCTTTTAGACGACAAAAAAGATATTATATGAAGTGCAGGATAGGGGGACTATAATGTCTTCGTGTTGTAGTGGGCATATAGGCGGCTATCTCCAAAGTAGACTAGCAAAAGAAAGTGAGACTTGGTCTTCTTGGGCACAATTTGGTTTTGGAAAGCGAGTCGTTGTTTGGCTTCCTTCATTTTTCTTTTCTTTGATCATTTACTTTGAGTATTGGGTCTTCATCTTGCGGGTTATTAAGCTCGCGCGTCCTTTGGAGGTGACAGGTGAAAGCGTTAGAATGACCTAGTAGGGCTTGGTCCGCCGTTTGGATACCTTTAATTTCCTTCCACTCTATTTTGAAGCTCTTCTGTTGAACATTTAGGGGCATTTTCAGGTTCTTTCCCTCGTGGATTTTTGGGTGATTCTGCTGGAGATGGAGATGAATATGGAGACGGCTCGCCCAGAGTTGGAATGGAGGAGCAAAAGGACTCGGACCTAGGTTCGTTTGCACACCAACCACGGTTTCGTTTTCGTTTGCAAAATATCTCTCTCAAGTGGGCATCGCAAGTGGTAAAAGAAAATGGTATTTCTCTTACAAAATATCACTGTCGTATATTGTTGTTTCTTCTATCACTTGATAAGATGCGATGGAAAATTGACTTGTCTGAACTGATAATATCAGCACTTCTAGCAATTGGCACCGGTCAAAAGTTGATAGATAGTAGGAAAGTAGAATATTCCTTAATTAATTATGGGTATTTCTTTGTTTTGAAAATGAATTGTGCAAAAGATACATAAAAAATGAAAAAAGAATCTTCTTTATTAATTTTATGAAAACATTGATAAGTAACTGATTACTTAAATAACTCCATTTGAAAATAAATTGGGTTTCTCCATTTTTTTTTTCCCGGTTTTAACAGGTGTGTATTCATAGTAACAAAGAAATTCCTGCCCGTTGGTATATAGAGGCTGAGAAATCAAAACGTAAAGGTTGAGAGATACTGCTTGTTGGGAACCAGAGAGAAAGAGGAAGAGAGAC
>VvCYP76C1e  (1500 bp)
TCAAGTGAAATAGTTAAAGATTCGATTTAAGATTTAATACCCTAAACTAGAATTATTGATAATGGAGGTAGATGCTAATATAATTTTATATGAAAAAGGTAGATAAAGAATATGCTTCGATTAAGTAATATTGAAAAGGTAAAAGCAAAATTCTAAAAAAACATATATTTTTTTAATGGGTGATGTATAGTTGTATTTCCCTTAAAAAGGGAAATAATATACATGTATATGTATATTCTATAACGACCCGTTCCTGTAGATATTGTTCGCTTTGGATCCAAATGAGCCTTCACGGTTTTAAAACACATTTACAAGGTTAAGAAGAGTTCATACTTATATATCACTATGAACTTCCTCCTTATCCGACGTGGGATGTTACAAACACCTCCCATGCAGATACAACGTCCTTGTTGTGTCCAATGGGATTGTGGGTCAAACAGATGAACACCCATACGGGGCCAAACAAACCCCCACATCGAGGTTGGAGATCAACTCTGATACCATTCTGTTACGACTCGCTCCCAACTATGTAGATATTGTCTCATTTGGACCAAAAAGGGTCATTACGATTTTAAAACACGTTGACAAGGTTAAAAAGAGTCCATACTTATATAACGCCATAAACTTCTCCCTATTCGATGTAGGATGTCACAAAAAAATATATTTACATATACAATATTTTCCAATGCCTAAGTCAACACCTTGGCAACACACACATACTCCATTTAAAAAAAATAAAAAATCTAAAGCATACACAAACGATTTATATATTTATTTTCTAAATCTAAAATTTCTTTTCTTCAATTGATTTTGTTTTCTATTTAATTGAATTTTTCTACATTTTCCTATTTTCATCACAAATTAATTCACATTTATAAATTTCCAATCTTTTAATTTAAAAATTAATTTAACCAACCCTAATCTAGATTGAGATCTTCCAAAAAATATCTAAAGTTTTTAAAACTAATTAACGAATATAAAATATTAATTTATGAATTAAAATCTTATTTGAAAAATTGATCTTCAAATCTTAAACCTCTAAATCTTCAACCCTATATTATCAAATCTTTCTGATTTTTATGTAAAAGAGTTTTATAAATAGAAAATATAGAAAAAATCTAATTTATATTTAGGGATTTTAAATATGAAATAACTTTTTTACCCTTATTAAATTACTTTAATTAATTTATTAATTTTTAAATTATGATTTTACCCTAAATTGGTTAGACGCATTACATATTCCTAGTGCGGTCACGTTACCAATCGTTGACCTGTTTTCACCCCTCACATGTATATTCCTTGTGCGGTCACGTTTACCCAATCGTTTATCTGTTACCACCCCAATAATTATTATTATTTCTTTTCCTGGAGCGATGACGTTTTACCTAGTTTTGGATCTGTTCCCACTCCAAGATGCTCGATCGGCAGCCTTGGAAACAGTTATATTCTGAAGGTAGAAGGTATAAGCTGAAGTGCAAGCAGCTGAGAGATTGAAAAGCA
>VvCYP76C1f  (1500 bp)
ATAAATTTGCATCCCTTGAAAAGGTTGAAAAGTTCATTAAGAATCATGGTAATATTCGAGATTAAATTGTTTAGGTAATAAGTTGAGCAACAATGATAAGGTAAATATATGTGTCTATTCTTCAAACTGATTTATTTATTATTGTTAAGGTAAATTTAATTTTTATCATTAAATTTTAAAAATAATAAGGGAACCAAGTTTTCAATCGTGATTTTCAATTTTTGTTTCTAAAATTTTATTTAGAAACAAAAATTGAAAATTGAAATGCAATTGAGGCATTCTAAACTATTTATTGAGATGTTGATACTAATAGCCTAAATACCATAGATCCATTTAGAATTTATTGTAAAATCTTTTTTAACCTCTAATGTTTCTATTAATAACATTCTTACTAGAAATATTTTTTTGAAAACTAATTTAATATTGACAAAAAAAAAAAAAGTTTTGATAATGTTTTTGATGATATATTGCAAAAATAAAAAAAAATGATTTATATAAAAAGTATTCCAAATATAAAATATAATTTGTGAGATTTATAAAAATTTATCAATGTCTGAGCTTTATTAGAAATCATATTTCAAACATTAACAAACACTTTTAATCACCCAAAAATCACTCCTAAACATATTTTTAAATACAAATATGATAAATATACTATGTTATAAATAATAAACTTTCTTTCTACAAATACGATATATAAATATTTTTATTTTTTAAAAGTTTATATTTTAAAGGAATTTTGAGTCAACCTTCTGTTATATAATTGATTAGGATTCCAAGATTGCCAGCCTAGTTTGGAATCATTTTAGTGGGGTAAGGAAGATTAACAAATAAATTTCTATTAATTTACAATATCACTGTAAAACCTTTACTAATTAATTAAGATGGGTTGCACAGTTGCAAGAAGATTATCATTTAAAATATTTATTAATTAAGATATCTTAGAAGATGTGGTAGATTACTATTCTATTAGAATATTTGGATTTACGAGAACGCCCTTATTGACGATCCTTTGCTTCGACAATGTTTAGAGTTCTTCGAACAATGTAATATAATTTTACATGAAAATTAAAGGCATGTATATCCTTATATTAAGTAATATTGGAAAGGTAAATGCAAAGTTCTAAAATAATATATATATATATATATATATATATATATAAATATTTTTTTTTTTTTTAATGGGTGATGTATAGTTGCATTTCCTTTGGGAAATAATATACATATATACGGATATTCCTAGTGCGGTCACGTCTTAGGCAATCGTGGATCTGTTTCCACCCCTCACATGTACATTCCTTGTGCGGTCACGTTTACCCAATCGTTGATCTGTTCCCACCACAATAATTATTATTATTTCTTTTCCTCGAGCGATCACGTTTTACCTAATTTTGGATCTGTTCCTACTCCAAGCTGCTCGATCGGCGGCCTTGGAAACAGTTTTATTCTGAAGGTAAAAGGTATAAGCTGAAGTGCAAGCAGCTGAGAGATTGAAAAGCA
>VvCYP76C1i  (1500 bp)
CCACTTTCAACCTGCAACTCTGCTCCAAAAGAACCCCATCAATTCTGCTGATTATTCGAATGCCATTAAGAGAACCATAAACGTGACCCATTATTTGCCAAACTTATTGGCTTCTGACAAGGCACTTCAGAACTGAGATGTTTATTGCCACTCTTTAGCTTATTGAACTCAGATGGCAAAGTGATCCCAAATACCAAGACTCCAATGCAGTCCCGTGGCCAACATTTTTGAACCAATCAACTGGAGCACAGGTACAATCACAAAAATAATCCATTAAATTCATTTCCCCCCATAACCACACTCCTCCAATCCCAGCAACTTGGCCGTTGACGATATCATCCCACCATCAACAAGAAACAGAGCAATAAACAGAGAAGAATAAAAACGTAAAAACAGAGTATGAACTTAGCTCTATGTCATGGATCGTCAAAGAGCTAGGAGCAGGTCGAATCCAAAGGAAACAAGAGTATGATTTTGATAAATCAAGTTCAGGGAAGGAGCAAAGCATGAGATATTTACAAGAGAAATCAAAAATACCAAAATAGAACCAAAACAGAGCATACATGTATACAATCGGATCCAGCAAAGCAAACCAGTGGCCCTTGATGTCCACACCAATCCACAAATTAATGCTCAGAAACAAACTGAAAATTTCAGGATGAGCTTAAACAAAAGCCTAAACATGGTTCCTCAAACATTAATCAGCAAACAATATCCAAAAATCAACGGAAGCATCAAGCAACAAACAATGCTCAATGATCAATAGAGACACCAAGCAGCAAATAGCATCCGATAAATCAAAAGGATAAAGGAAGATGACAGACCCAATGATCATACCTGGAAATGCCTCTCCAAAAGAACCACTCGGAATCCTCTCTACTCTGTTTTTTTTCACTTTCTTCAGTTCTCCTTGTTCTGTTTCAGCTCTCTCAGGTACCAGTTCACTCTCTGTTTTCCTTTCCCAAGCTCGTTTTCTTCTCCTCTCAAAAAACGCCCTCGCAGCCTGCTCACCCCGCTTAAAAAAAAATGGCTCCCTCATCGTCTAAAATGCTCCCTTCCTCCCTCTGCTCCGTTTTTTTTACCGTTCTTGCTTCTCCTCCAAGCCTCTCCCCAACGGTCCTTGAATCTCCCCTCCGGACCCAGGAGAACATCCTCTCCACAGCTCCTTAACAGCCCCAGCTGGCCTAAAAAGAAAGGCTCTCTTACTTGGCCAAAATGAGGGGTCAACAGTGGAGCTGGCCTTCTTCGTAAACACACTTGCCACCAGCCAGACCCAGGAGAATGAGATTAAGGTATAAGAATATAAATTAACAATGAAATTAGGGTAGAAATAGTGAAATCTAAAAGTATATACGCGTCATCTTCTAATTGATGATACATTTTTTTCGATAGGTAATATAATTAGCTTAAAAAATAATAAAGAGAACAAGATTAAAATGCAAACTATACGGTATATAAAGGAAGAAGGTAAGACAGGAAAAAAAACCTAAAGAAAAAACA
>VvCYP76C1l  (1500 bp)
TTTAAAAAAACTTAATATGAAAGTTAATAAAATGTTACTTTTGTCGTAGCTTTATTTTGCCTCATACAAGAGATTTTTCTCGTTGAATAAAATTTTTAGTATTGTCAATAAAGAAAAAATAGAATGTTACTGCTAATAAAATCTCAAACAATTTCCATTTAGATGTGTGAGTGTTTAGCTAGGTTGGCAATTCCGAACAAAATTCCTAAGTATCCCTTAACTCGGCTTTCAAATTCCTATTCGGACTACTTGACTTTGAAGACTAAAACTTTGCTAAGAGACCAAGGTATGTAGCCGAGTGTGTGGTGATTGGATGTGAATCAACCTGGTTTTTAATCTTTAAATGTGTTAGAAAGTTGGGAGAAATGGTTTTTGGTGCAAAACTTTCATTCCCTTGTTTCTGGATCGATCCAGGTGCAAGGGTGGATCAATCCAACTAATTCATTTTTGATCAAATCTCAGCCATTAGATTAAGGGTTTTTTTTTACACTTTAAAAAGCAATCTTCTCTCATTTTTGTGAGTTGTGGTTGCAGAAAACGTGGAGAGAGCAGCCACACTCCTTGTGTTCTTTATTTTCTCATTTTGTTTTCCTAATTTGGGGTTTTTGATTGCAAAGAAAATCCACTTCTTTTAATGTTTTCCAAACAAGTTTTTAATGGGTTTTCTTGAGCAATAAATGGGTTGATTCATTCCTTTATTCACATCTCAATCTCTCATTCTATTTGGGTTTGGGTACATACCCATTTTCTTCTTGTGTGGATTCAAGAAGAGGCCGGGATTGAGCTTGGTGCGGACTCCAAGTGTGCTCCGAAAGAAGAAGGGAGAAACTGAAAATGAAGGTACTAGTCAAGTAGTTCGGGAAGGATTGGTTGACCCTAGGTAAAACCTTGTACTTAGTTTTTATTCTTCATAGTGGAGTTTTTCAATCGATGATAGGCCCGTGGTTTTTGATCTCTTCGGAGGTTTTCCACGTTAAAAATCTGGTGTTCATTGTCTCTTTCTCTCACTCTACATTTTGATTTATTTTTGAGGAGTGTTGAAGCATTTGCATGTGTTTTACATTGATAAATTGTTGGGAGAGTGTTGTTGCATATATTTTTGCTTGTGGATGTTATGTTTTGTTGAAAAGTTGTTGGAAGAAAAGTTTCTTGACATTAAGATAGTCTAAGGTTAGGTAATATTTGTTGGGAGAATTTTTAAATTGTTCTACAACACCTATTCAACCCCCTCTAGGTGTAGTCCATTATTGAGATTCACATTTTCAAGATGGTCGTGTACAAGTCTTACAAGTCTTATGGTTGGAAATCAAGTATGAATATTAGAATTCAAATTTTACAAGTCTCTCTTTTTCAAGTTTGAATATTTTTGACGCAGAAACCAAAATAACCATGATTTTGTTGATAAGCAGTTCATGGTCGTGTTGTTTCTATACAAATACCACAGAAGATAGGGAGAAAGGGAGCATCAAGAATAGAAGAGTAGTATAGAAAGGGATCGCC
>VvCYP76C4b  (1500 bp)
TTGTCGGTACGTGACATGCTATGAATTGACATTAATTTTTTTTGTATTAGAGAAGAAAAATGATCACAATTAAAATAAAATGCTATACAATCACCACAGATAATCTAAATTTATTGGATTTGAAACAATCTTAGTGCTGACTAGAAAGCCTGCACCGCGCGCAATTCGAGCAGAGAAAGGGATAGTCCCCGTAAACCTAATTGGTGGGGCGGCGATATGTACACGGGCAGTTGACTAGCATTAATTTCTTGCTCCCTAGTAGGGATAAGCAACGGGGCGGCCTTGGCCCGGGTGTCCCATCCCAACCCCGTCGTTTATTTAAAATAATTTTTATTTTTATCTTATTTAAAAAATTAAATAAATTAGGATGAGACGGTGATGACACGAGAATTTCTCCCCTTCGTCTTATCCCATTTTAACTTTTTTTATTTTTATGTTTAATTTTTTAAAATTTTAATTATATTAAAATAAATTATTTTTATAAATAATTAAATTATTATATTTTTATAACTTAATTTATTAAAAATATTATTTTATTATTCATATATTAAAAATAATAGAATAAAAAATAAATTAAATTTATTTTAAAAATTAAATTTATATATAATCGAGATGGGATGAACTGGACATGACAATATTCGAATTTATCCTAGGTTTTAAAAGAATTTTGAAACCGCTTAATTAAAATTAAAACTTATTCCATTAGGTATGGAGAAGATGAGTGCTCAAAAAAATCCATGTCATTATCATCCCTACTCCCTCTATCATTAATTCCGTGAGGCACATGGGTGTAGTTACTAAACATGTGCATACAAATACGAAGCGGAGATATCATGATCATGCAATATATAAAAGAGAGTAGACTTTGTAGAGATTGGTCCGCCACTTGCATTTCCAAGTGGTAAGAAAATTCCAACACACCACCCAGTGTCAGAGCCATGTGAATACAATGCAGATGGGAGCAGAGGAAGCTAGCTGGTGACCGTTGTTATAGCTTATAAGTTATAATTGTAGTGCCATCAACATGTTAAAGGAATAACATAAAAATAAAATAACTCACGTAACTGACTAATGATACTAACCTATTTCCATCGATTCTTTTTATTTATTTATTTATAATTATGTGATAAAAATATTATAAAATATAAAAAAATAGATGTAGTTATTAGGTCTTTTTATATCTTCATCTTAAGTGTGAGCTCTTTTTATTATAATATGCATTTTAATTCTCACAATTCCTTACATCTACTCTTTAGTGAACTCTCTTATTTTTCATAATTTTTTTCTTTCAGTTAAAAAATATTTATAAAGATATTTTTATTAATTATTTTTACTATATTATAAGGAATTTCTTTACAATCACGTACAGAAAATATTCTATATAATATTTATTTTATTAAATATATATATATATATATATTGGAATTTGATACATCTCTCCTTTGGGTAGCTTATATATACACCAATTGGCCATTGGCCAGAGGACATAGGCCATAGAAG
>VvCYP76C4c  (1500 bp)
TTGTCGGTACGTGACATGCTATGAATTGACATTAATTTTTTTTGTATTAGAGAAGAAAAATGATCACAATTAAAATAAAATGCTATACAATCACCACAGATAATCTAAATTTATTGGATTTGAAACAATCTTAGTGCTGACTAGAAAGCCTGCACCGCGCGCAATTCGAGCAGAGAAAGGGATAGTCCCCGTAAACCTAATTGGTGGGGCGGCGATATGTACACGGGCAGTTGACTAGCATTAATTTCTTGCTCCCTAGTAGGGATAAGCAACGGGGCGGCCTTGGCCCGGGTGTCCCATCCCAACCCCGTCGTTTATTTAAAATAATTTTTATTTTTATCTTATTTAAAAAATTAAATAAATTAGGATGAGACGGTGATGACACGAGAATTTCTCCCCTTCGTCTTATCCCATTTTAACTTTTTTTATTTTTATGTTTAATTTTTTAAAATTTTAATTATATTAAAATAAATTATTTTTATAAATAATTAAATTATTATATTTTTATAACTTAATTTATTAAAAATATTATTTTATTATTCATATATTAAAAATAATAGAATAAAAAATAAATTAAATTTATTTTAAAAATTAAATTTATATATAATCGAGATGGGATGAACTGGACATGACAATATTCGAATTTATCCTAGGTTTTAAAAGAATTTTGAAACCGCTTAATTAAAATTAAAACTTATTCCATTAGGTATGGAGAAGATGAGTGCTCAAAAAAATCCATGTCATTATCATCCCTACTCCCTCTATCATTAATTCCGTGAGGCACATGGGTGTAGTTACTAAACATGTGCATACAAATACGAAGCGGAGATATCATGATCATGCAATATATAAAAGAGAGTAGACTTTGTAGAGATTGGTCCGCCACTTGCATTTCCAAGTGGTAAGAAAATTCCAACACACCACCCAGTGTCAGAGCCATGTGAATACAATGCAGATGGGAGCAGAGGAAGCTAGCTGGTGACCGTTGTTATAGCTTATAAGTTATAATTGTAGTGCCATCAACATGTTAAAGGAATAACATAAAAATAAAATAACTCACGTAACTGACTAATGATACTAACCTATTTCCATCGATTCTTTTTATTTATTTATTTATAATTATGTGATAAAAATATTATAAAATATAAAAAAATAGATGTAGTTATTAGGTCTTTTTATATCTTCATCTTAAGTGTGAGCTCTTTTTATTATAATATGCATTTTAATTCTCACAATTCCTTACATCTACTCTTTAGTGAACTCTCTTATTTTTCATAATTTTTTTCTTTCAGTTAAAAAATATTTATAAAGATATTTTTATTAATTATTTTTACTATATTATAAGGAATTTCTTTACAATCACGTACAGAAAATATTCTATATAATATTTATTTTATTAAATATATATATATATATATATTGGAATTTGATACATCTCTCCTTTGGGTAGCTTATATATACACCAATTGGCCATTGGCCAGAGGACATAGGCCATAGAAG
>VvCYP76C4d  (1500 bp)
GAAATTAATTTAGGTAAGTACTTGATTTAATATTGATTTGTAAGTTTTTAATTTTAAAATGTGTGTAGATGGATTAAAAAAAATAATTAATATAGAAAAATTATAAGAAAGAAATAGTAAACTTATAAGAGTCTAAAGATAGTGAGACCATTTTGGAAAAGAAAATAATATAATATATTTTATTCATTTTCTAGAGGGACTTAGAAAGTATGAGCTATATGGAAATTTATAAATTAAAAAGATAAAAAGAGAATATGAAAAATATTAAACTTAGAAAAGTCTTATAGTGTTTTTAAAATTATGGTTAATTGCTATGTTTAGTGAGAGAAAGAAATACAATTAAAAGTAATTACTAAAACTTTGCCTTTTTTTTACTTAGAAAAACTATTTTAACAATACTTACATAAGAGATAAGGGGATAATTTTAATATTTTTAAAATAAATAACAATTCATTTGCCAAATTGACTCAAGAAAAATTATTATCATTTCGATTTTTTTTCTTAAATACTATTTGTAGGCGTTTTGTTTTTTTAGTTTCCGCTTCATTCTCAACTTTTTTTTTTTTTTTCTCAAATTCCCTTTCTTATTGTATACAAATTACATGTTAGTTTCTACCATCTTGAATATTGCAATTAAACAAACTCATTTTGAAAACTTTAGTGAATTATTTTTTACATAAGATAATTTAAATTAAATTAGAAGTGAAAGTATTTAGTAATAATCTCTTATTAACTTTTTTTCTTAAAAAAAATATTTTAACAATGTTTATCTTTGAGGAAAAATTATTAATATTTAAATGTTATAAATCATGTTACAAAATATAAGAGTGTTTAAAGAGTTGTATAAAATAACTTTTTAATAATTATATTTAATTTTTAAAAGTTATCTTTTAATATTTAAAAGGCTCTTTAGGGTATAAATTGGTGCTTTGTTTTTTAGGAGAATTTTAGAGAGCTTCTTATCTATTTCAAAATAATTAAATAAACAATAAATTTTTTTTTTTTCATCCATTTAATATTTATTAATATTTTATTTTAAAGCCTTATTTATAGTGAACCAAAAATTATTTTTAATATTCATTAATTCATTAACATTTTACTTTAAAATCTTATTTTAAAGCCTTATTTATAGTGTATGTGTCATTAATTTTTTAATTATATTTATATTTGTTTTTTTATAAACCAAATAAATTCTCCATACACAAATGATTGTGCTTTTGATATATTCCTTTTTTTAAGCATTAATACTAAGTTTACGAATGACACATACACTATAAATAAGGCTTTAAAATAAGATTTTAAATTTTTTGGTTTCATATATTAATACATAGACATTAATATATGATTAAATACTTAAATCCAAAGTCTATGCATTAACATACATCACTCGTGTGGATCACGGCACCCATATGAATCACAAGTTAAGTAACATACCACTAGTATATACAAAGGAACTCAAACACAGAAGAGGGAAGGAAGAAGAGTCTAAAAGTCAGTGAG
>VvCYP76C4e  (1500 bp)
TAAATCAAATTAATTTTATATATAATCAGACAAGACAGGACGAGACAAAATAATACTCGAACCAATTTATTTAAATTTCAAACTCGTTCTATTAGGGATGGGCACAAAAAAAAACCTATCACATTGTCGATCATAGACAAGATTAATATTGAACTTGATTTTCTTGTAATACAAAAAATACCCAAAGATCATAAAAAATTATATAAAATGAATTTATATTGTATGAATATGTTGTATCATTTACTATACGCTTTACTTATTATTTTTTTCCTTTAAACTTTTAATCCTCTAGTGATTTTCTAAAGATATATATTTTTTAAATAATAAAAATAAATAAGTTAAATTGTAAATTTTTGATTTTAAAAAAAGCTTATTTCGATATCTAACTTTAAATTATTATTTTACATGATCTTAACATGATTTTTTTTATATCATATAATAATAATACATATTGTATGAAAATAAAAAATATATCCAAAAATTCTAAAAAAAACGGTTAGTCCTCCCTTTTTAACATATGAAAATTATGTTTTAAAAATATTATTAATATTACATTTTAATGAAACTTTCATTAATTACTTGTAACAACCTTAGTTATATTATTAATAATATAAAAAAAAACAAAAAATAATTTTAAATTATAAAAAATATTATCAAAAGGCAGAGTAAAAAGGAAAAAGTGGAGAAAGAGAGAAAGAGTTATATAAAAGAATGAGAAGTACGACACCCACAAATACATTCACATTTTATTTTCTTTAATGACATTTTTATCTTTTATATTTTATATTCTTAATATTAATTATGTTGAATATGCGAAATTCAGATCCATTATTTAGTTTGATGGCCCCCTTGAAAAAATCTTGAGAGACGTCTTAAAAGCCCGCACCGGCCGCAACTGGAGCCCAGAAATGGGGAGTTCCCCAAACCCTGATTGGTGGGGCGGCTATATATGTCCAGGGACAGATAATGTCTATAAATAGAGAATTGACTAGCCTTAGTTTCTTGCTGCATGGGCATGAATTCGTGAGAGACACATGGATGCAGATAGGAAGCACGTGCATGAAGATACGAAGCTGAGATATTATGTAACATATATAGGAAGGTAGACTGAGTAGGGATGGGTCCATCACTTGCATTTCTAAATGGTAAGAAAATTCCACCACGCCACTCGGTTCAGAGCCACTTGAATGCACTGCTAGCTGGCGAACATCGTTATACTTACATCATGTAAGTGTTGCGCCAGAGGACAAAAATATATATGCACTATCTCCACCTCAACCATGAGTCATTTTACTTCATAATGTATTTCTCACTCTAGTTTTTTTCTCGAATCTTTATCTTATTTGTCTTTCATAACTTTTTCTGTGTCCTAAAATCTCTTCTATATTATTCTTTTTAGAAAAAGAAATGTATTCTAAATTGGAGTTTGAGATATCTCCCCCAAACCATAGCTTATATACTCCCGTTGCCATTGGCTCATAGGCCATAAGGCCATAGAAG
>VvCYP77B1  (1500 bp)
TTTTTTTGTGTAATTTAAATTATTGGAGAAATTTTTAATTTTAAAAAATATTTTAATATAAAAGCTTGTAAAAGTTTTTATAGATCTTAAGTCATCAATACAAAAACATTTTACTTGTAATTAAAAATGCATTTTATAGTGATTTTCTTTTTAATTCTTAAAAAAAAAAAATTAAGTATTAAAAAGATAAAAAATATTTTTTAAAATTAATATCAAACAAACTCTTAAATATATTATAAAACTATCTTCATTTGAACTCGTATACATTTCCCATTTGCTTCCAAAACCTTAGTTTGCCAATCAACAGCATCAAATTTTGAAGCAGAGTCAAATTGTTGGGGTCCCCACTAGCCATGAATGGCAATGAAAACCAATTTAATTAATTGGTCCCCGAGGTATGGATGAATGCCACATTTTTTTTTTCCTTCGTATCATAATTTAGGGTCGATCATATTTCAAATATCCGTACAAGGCAAGGGTTCTCCGGAATGGCTCTCTCAATTATTATAGAATATTAATGGTTATTTCCCTTCATTTTTTAAACTACCATTTTATTTGAATTTCAAATTATGACAAAGAAAAAAAGAAAAAAAATTCCAAGTGCATATATGAGTGCATAAGTGCCCTTTATTTGGATGTAAGCCCAAATGGTTTGTTTAGTAACTATTATTGAAAATAATTTCTAATTTTTTTATAACCATTTGAAAAAACTACCATATTTTTTTTTATATATATATTTATTTTGAAAGTAGGTTGTTTTTCAAAACAAATGTGATATGTTTTTAACCATGTTTTGTACATTATTTTGGGTAATAATTAAAAAGATAGAAAATATTTTAAAACTTTTGCATTATAGATATTTTTATAAACTTTTAACAAAAACATTATTTTCAAAATTTGTTCTAAAGATGCAAGTGCATTTTTGTATTATCCTTATCTCAATACTTTTGTAAAGAATAAACTGAGAATTTTTTTTTTAATATTTGATTTCTTAAATAGAATTTTATTCCAAAAATGATTTAAAAATATTTTCAAAAAAAAATCAAAATGCAATGGTAACTCAGCTTTATCCATTCCTATCTTTAGAGAGTTTAAGCCTTTTTATGCCTCGATCATACTATGATTAAAAAATAATGGTCATCTTAAGATCAATTGGAAACATCCAATTTTATGCTTTCTTTTATATATAAACAATATCATAGGATTATACCCATCATTGAATGAATAAGTATACAATTAGCCGAATAATTAAGAAATTAATCCTGGTTTCCTTCTCCTCCTTTCCCTTGAAGGGCTCACGAGGTAAAACCCTAAAATCAACAGCTTAAATCCGTACACACAGTAAATATAGCTGATGAAAATATTGAATACGAAACAGTGGGCTGACCACCAAACTCATTCACTCCACAACCTCCTTTTGATACCTATAAAACTACCCTGCCTCTTTGGTCTTCATCACTTACACCGTACTTCTTCATTCATTCTCTCTAGTCTCTACCA
>VvCYP77A4  (1500 bp)
AAAAATAGAATAAAAATATATAAATTTATGTGAAAAACTCTAAACAAGAAAAATCATAAACAAAATAAAAAAAATTCATTATATCAAAAAAGTATCATAAGATTGGGAGCAATTACAAAAAAGCATAATCATCATAATTCTAAAATTACATTATCCCACACTTAAAGTATGTTTGATAATGATTTTAGAATATCTTTCTACTTTTTTTTAATACTTAAAAGATAAAAAAATTTATATATTAAAAAGATTAAAAATACTTCATAGAATTAGTATCAAACACTCTCTTAATTTCTCTATTACTATTATAAAACTCCAAAAAAATCTCATAATTATAATTTCATCATATGTATCGTACCACGGGCTTTTCAAGTTTGATCAAATAGAATTCAAATAACCAAACTTTAACAAAAATAATTACCTTTAAGAAATATATGAAAACATACAAAATATATTAAGAATATTTTCGGTTTGGGACAATTTTTTGTGTTAACAAAAAAAAACATGAGAGAATGTTTTTAAAAACTGTTTTGAGAAACCGTTTTTTGAGAGAAAAGGTTAGTGAATTTTTTTTATTTTTTTGGCACTCTTTAAGGCATATTAAGAGGAGAATTAAAGAGAAAATCAATTCTTTAAAGCAAACCATGGGCTCCAAATAAGGCAAAATGGTGTACGAACCTGGAACACGTAAAGCAGTTTAAATCAAAATAAGCTAATGTACCATGACTGACTAGTGACAGATGAGATGAATCTCAGTCCCGTCGCAGTGCTGGTCTACATGGTATTATTGTACAGGTGGCTCTGATCCTACTCAACTAACTCATCACTGACTCTCTTTTCATTCTCTTCCTCGATATTTCAATCTCTTTGAACTGTGAACCATGACAGACTCTGTAGTCTACACCTCCTACTCTCATGAATCAATTAATCCTTTTGAGGTCAAGTTTCAGCAGTAGATGCAAGTACTAAAAGACTGTAACTCACCATTTTCCAACCCCAACTCCATTTATTTTCTGTTTTTTTTTTCTTACTGTGAAATGCTCCATCCAGTAGTGGCCTCCGACTCAAGGGTAGAGTTCATTTATGAACCGTTTTTATTCAATGAATCCCAATCAAAGGCTTGGCACACCAGATTCAGAGGGCCACCATAAATTTCTTCAACCTTACCAAAACTCTTAATTTAGTCTAATTTTTTAGTTCAAATTTGAGAGACAATAAGAAATTTGTGGCCATAAAGACATTGCTTGCATGAGGGGCGTCAGTGTCACTGGTTTTCCATATTTCTCAAAACCCCATCTCTCTCTCTCTCTCTCTCTCTCTCTCTCTCTCTTTAGCATTTAACACAACCAGTTGTGCGTTGGTAGAAGACTTGAAGAGCCTTAATTGAACCCCACCTGCAATTTCACGCCCTCTCCATTTTATACCCCTCTCCAACCTTCCTCCATTACTTCATCTCCTCTTCTCCTCCTGCCTTCTCTCTTTCTCTGTCTCAACACCATCTCC
>VvCYP78A5  (1500 bp)
AGAGCTTTTGAGTTCGCATAAGCTAACCAAACAAGGCTTAATGTCATGCATATGGGTGGCAAATGGTTGTATTTTCTAATGTTAACAAAAGAGAGATTAAGGAATGCATCCCATTATGGGATTGAAATTAAGAAACCTTATTGGTATTGATAATATATATATAGCACTACTCATCCCACTATCATACTTAAAAACTTACTCATGATCAGAGCCTAATTGCCATAGGTTTTAGCATGGGATTACGAGACAGAGTTGGTTTAATTTTAGGAAAAATTATAGGGTTATTTGATTAAATGGTCATTAAAAAACTAATTTTGGATATTTAATCCTACATTATTTTATGACTCCGTTTTGACGAAAATGTCCTTATTTATTTTAATGAAAATACCCTTATTTTTTTTATATAAAAATAATAATTTCTTTTAAAACTTACATATAAATATTTAAAATAATAAAAGGTATTTAGGTTAAAAATTGATTACTCTTCAAATAAAATTTAGAGTTTATTTTATCATTTTTAATCAATTAATTCAAAATTATATATATGTGGATTTGAAAATTTATATATACATATATAAAGGGATAAAAAAAACATCAAATTACAAATTTAACCTTCCACTTTTTTTTACAAAAAAAAAAAAAATCATTTTCAACCAGAATATACTTATTTTTTTCTTACAAAAGTATTTTTTTCTTTTAAAACACACATGTGAATAATAAAAAAGTTGAAGGATATTTAAAAAAAAAAATGAATAACTCTTCAAATTTAAAAATATGAGAGATTAATTTTGTAAATTTAGGATATTTTGATTGATTCTAATCAATTAATCTTATAATATAAATAAGCGATGTCGACGACTCAATAAGAGTGGGTCATGTCCATATTACATGTCCCAAAAAATTCACTCATTATTACCCCACTTATGCCAAGCTTCATTGGGGGCTTTTGCTGCCTTCTCATCACTCTTTTTATGAATCTCATGATTATGCATAATCTCATAATGACATATATCTCATTTTCATGTCCAACATCCAACATCTCTTTTCAATCTTTTAATTACTTTTATATATATATATATATATATAAAATATTTATATATATATATAATATTTAAAAATAATTAAGGTATATATAATAGTGTTACTCTTATCCACAGTAGGATTTTCATTATGGGGGACTTTATTGTTCTTTTGGATTGCTGATAAATACTCTGGGAGAATCCAAGAATTCTTAAACTTACTCTGGTTTTGGCCCCACGATTAGACAACAGTATAATTCCAAATTTGAGGGAATAGTTGGGACTTGGGATTTATAATCGGGTGGGGTCTAAGACACGCAACACTAGAAGTCATGGCTCCTTAACCAGGGTTGACAAACTAACCATACGTTTAACCATAATCACTTTCCACGTACTATATATACAAATCAGCCCACCTGACATTCTCTACCACTACGAAAAGACCTCCCCTCTCTACACATTTCCATTAGCTTTTATCCTA
>VvCYP78A10a  (1500 bp)
CACCAAGTAAGATATGGTGATACCATTAGTCGGGATACCCATGTGGATCCCATCCAATCTTATTCATAATCTCATTGTTTTATATTTTGAAGTTTGAATATTATCTTATTATTTTATACCTTAATCTTATGTATTTGTAACTTTGTTTAATGGTTTAGATTTTATTAGGGGTGTAAAGTTATTGTCGAATTTTATTTGACAAAATTTTCTTATATCTTTCTCCATATTGTAATTTTCTTCCTTATTTTAAATAGTAAACTAGGTAGGAAAGTTGGATTCCTCTTCTTGGATGTTCTTTCATAGTTTTATCCAAACAAAAACCTTAAAAACTAATATTATTTTTTCTATAAAATGAGCTTTAATAATCTCGTGCAATTGAAGGGATACAAAATCATTGATCCATTAAAAGAATTTCATCTATTACATAGTAAGGGTAAGAAAATATTAATTATATGGCTATTTTTTTTATTTCAATTGAAAAAGATTAACAATTACATTTGAAATTAATCGGTTAGAAGAGATGAAATAATTCACAAATTTATGAATCAAACTTTTCCCATGTTTTTATTTGAAAAGTAGTTTATTTTTAACATAAATACCCTTTACCATTTTGAATTTTTACATTTAGGTTTTAAAAGAAAATTTATTTTCATAAAATAAATAGTTAGAATATTTTTGTGAAAGCGAGACTAAATTTTCAAAATTGGGTTTTGAGTGACACAAGGAAAAGTTTAAACAATTTAACTACTTACCATTTTATTTATTTTTACATTCAATTAATGATGGTATTAATACTTTGTTCACTCTTATACATACGCATTATTAGTAATGCTTCTTAATAATAGAAAACACGAATTTTAATAGTATACTGAATTGAATTGTATGGTTAAAAATTATAGAATGATGATGCTCATTGCTCATACATGATACGCCTATGCCAGATTAAATTTAAATGAATATATATATATATATATTTGTTTTTTTTCTGGATATGTCATATGTGCAGGAAGAGAAAGAGTAGGGAAACTTCAAACAATCCATGGCGAAACTTAGTGGGAAATAATGGTAAGTCCTGTGTTGGAATATATGTCAGCGATTGATCAAATTCCCCAGCAATCAAAATAAGCGAAAGATTCACAGAATCCGGGAAACCACGTGAACTCCGCTCCTTTATAATCTTCCCTATTCCATCTCCTCCACCTCAACGGCTCTGATTATCTTAGCTCCATCCTCGTGGGACCCCATATCAAATCTCTACCATCGCCATAAAGCCTTGGAATCCAAATCCCATCGATTCGCCGAAAGATGAGCCTGTAACCCTGGTTGAGTTTTTTCCCTCACCTGGGGTTCATTCATTAACTGCCTCCCCCCCACCCCCTATTTAACTGCCAGTCCCACACTCTTCTTCTCCTGCGCTTTTCCAGTCATTCTCGATCTCACAGAAATCCTCTCACTTTGAAGGCGGTTTCCGTTGGTCGGAAAACCACTGGTGGGTTGAGA
>VvCYP78A6  (1500 bp)
TTCGGAATGTTTCTATTCTTTCTTTCTATCAAATTAATTTCAGATTGTTGACTTCGCAGGTCAATGGGCTTGTTGGGATTTTCAACATGACCCCACTTTAGAATGATCATAATGTTCATGGGGTTTTGCAATCGTGAAGAAGAAAAGAGGACATTTTGGGAAATAAAAAAAAGTAACGCGGGAGTGCCACGATTCCAGCAAGACCCTGAGTGGGCGAGCATAATACCCTTGGATTTGACACGCGTCAAGCAGGCAGGGAGGGTCCACGGAGGCAATGACCACTCAGCCCAAAGGGCTTAGTGTCTATACGTCGAAGGTCCATTACTCCATGCGGGGCCTTCATGCAGGACACGATACCCTCCCCATCACCCTCCTTCATCAGCCACTTGTCACCATCACACCCTGATATCTATTCCCTCTGTCTCCTCTCCTCCCACTCTCACCTCCGCCGCGTGAAGGACACACGAACGTCACCCTTTTCTCATGACCGCAAGTTTGTAACATGGCGTTTTATTATGGGCCCTCTCATTGATAAAGGTTTCCACCACGCTACCTGTTTTGTTTTTTTGTTTTAAACAAGAAGAATCCACTTTTCAATAACTATTTCATTAAAATTAGTTTAATAAATATAAAATTCCAATTAAACTAAAAAATATATATATAAGAATTTTAAATAAATTTTATTTTTTTAATAAACAAATAAATATTTGATTAAATTCAACGTGACTTCGAGTCACTTCCCCACAATTTATATTTTTATTTCGGACATAACTAACATATCATTTAGACAATCCAAACATTGTAAATGTATATAAAATCGAATCGAATCATATTACAAATTTTTATATAAACTATTGTAAGGATAATAAAAGAAAAAACCAAATATGAATCATAGAATCTCACCTCGAAGTCAATTTTTAGACATGCCGAATATGGGTTTGTTTGTGGCCAATGTGGTGTAAGATTTAATGCAAATTGAAATTTTTTAAGATGGGAAATGGTGAGAGGATTGAAATGTGGATAAAAAGTATGAAGTGGTAAGTTTTTTTATTGATAAATATCATTAATTTTACCTCATGTCATCGTCAGACAGTATATCACAGGTGATTAGCAATATGATAATGATTAAAAAATGATAAAGGGCACTGAATCGTGGGCCATACTATTTTTATCGGCCAAAAATTAGTCTTGACTCTTGGGTACGTGAGTTATTGCTCAACAGCTCTGCTGATGTTGGAAACCTGGTCACGCGCTTTGAGGGAGCGCGTGGGAATATCTGGATTTCCGTTATGTTTTATTGGCGGCGCACACTGATATTTCTATAACTTCCACTCTTTTTTTCCGTTATACGGTCGTGCCGCCCCTGTTTAACGGTTACTTTTTTTAATTCCATTAAAGCCCTTATTCACTCTATATATGGGTCTATATAAAGGGGCTCTTCTTCATAGTAGTACCCAAAAAAGGAAATAGAAATACAACTGGGTTTGGTTGAGTTCCGCC
>VvCYP78A10c  (1500 bp)
CCAACTTCCATCTAGAGCAATAGAGAAATGCGTTGAGATGAAGGATGGTAGAGCCATGAAACTTGAAAGAGCAAAGAACAATCCAAATGGGTGGTCCAAGATGGAACCTTGGTTCTACTTTTATGATATTTGCATATCTTTCATGTTGCGTCTTAGCTTTTTTTAAATGCAACATGCAAATTTTAAAGTACAAGTTGTGTTTAATGAAGGTGGAAGAAAATTTTATAATGATGATGTGGATTTTATTATTTTCTATTGTCTATAGTTTGATCATACCGGGGATTTTTTTCAACATTATTGTCATATTTAAAGAATGCATATCTTTGAAGCTAGATCGTCCTATTTGTCGTTCACTTTCACACCACATTTCTCTTTCACTTTTTATGATGGCACCGGTCAATTACAACAAGGAATGATTCCAATTATTTGATTGAATCACACATGACTCGTTAATTACCTCACCTCATCGAGAATCATTCTCGCATTAAAAACATTATAAGGAGGAATAATCATATGATTCATCTTTTGAAATTTGATTTTGCAAAATCTTGAATATTTGAAAAAAAAAAGGGGTCGCATGGAAGATGTGACGTGGATGTTATGATATTACAAAAAAAATTTCTCATCTTTACGTAGCATTACATTGATAATTAGGTTTTATCTTATAATTGTTTTTTAAAATAGTTTTAAAAATAATTTTTTTATATTTTATAAAATGAAAGTTTGTTTAAAATTTTGATATATTTTTAATATTTTAAAAAATAATTTTTTATGTTTAAGACTTTAGTTTTAAATGTAATATATACTTATATAATTATTTTTTAAAATAATTTAAGAAAAAAACAACTTTAGGTAGTCTTTCGATTTTCAAATGTTTACCAAAGATACCCTTGCTTTCAAAACCATACGATTCGTCTTATCATATATAATTTTTTTAAACATCACTTTTGTTCAAGAAACTCCGATTATAAAGTGGGGACAAAAAAGGAAAGGATGCAATGGCTGAGATTTTCTTACCAGGTTGAAATTGACATCATTCACATCCAAAATGGGACCCATTTGAAGCCGGCAAGCACTTCTGTGTCGTTACTCTGTCCCCAGGATGGGCCCATTTTTCTTTGGGGTGGTGGACAGCCCAAAATAACAACTTGGCACCGGGTGGTGGCAGAATCGTTAATTTGATTGAAAAAGACGGTCCAAATCCCAAAGTTGATTCGCAGAAAAAGCAAATGGTGGTTAGAGGACCCCCATCAGGGTCAAAACAGTCTTTACTAACTACGGTGAAAAAAATAGGAAGGAAAAACTCCATTTTAACCGAGGTTAATTTTTTAAGCTTTTCTTTTTTCGTTTTGTTTTTTTTGAACGCCATTCCAACTTCTATTTAACCGCCCTCGCCACGCACTTCGTCTCCTGCAACTTCTCTACTTCTCTCTCTTTCGTTTCTCTATCCTCTTCCCTTGGTGTCTCTCCCGGGGAGCTCTACGGCTCTACCTTGTGAAA
>VvCYP78A7b  (1500 bp)
AATCCGTGTGATTATATTTTTCTCATTTATATATATGTTTGTGGGTACCAAAATAATATGAAGTGCTAAAAATAATGCGCAAAACTATTAATGTTTTTAAAATAAATTAATATAATAATGTTTATATAAGAGATAATAAGGTCTATTTTAAAAAATTATGATATTCAAATCTTAAATTTGAAAATTTTTAAACACATGAGATAAATTTATATTTTTTATATAATTTTTCTTTAAAAAAAAAATCTAAAATAGGAATTAAATTGGTGTTTTGTAAATTAACTTAATAACTTAAAAATGATTTAATGACTTAATTTAAGTGATTAAGTAAATTAAATATGTTTGGTAAAATAATTTAATAATATAATTTAAAGTAAAAAATAACCTTTAAGTAATAATTAAAAATAATTAATTTATTCTTAAATCTAGATATTTAATTTACCTTTTTCCATCATTCACCCTAATTACTTTTATGATTTCTTTTACTATTTTGTGACCTTCATTGTTACTCGACCTTTTTTACCATAATTATAATTTATGAAGATAAATATATCAATTTGATGATTTAAAATAAATTTTATAAAAAAACCTTAATATTTAAAGTAAATATTAATTAATAAGTTTTGAGTCATTAATTTAAGTATAATTTAACTTAAAGTCAATTTAAATTATTAAGTAATAAGTATTAAGTTTTACCAAATACCCCATAAATCTAGGTGAATGAATCGTGAACGAATTATTTATTTGGAAATTGAATGAAATAAATCAATAAACAAAAGCCTGTATATATATAAGTGGATATTAGAAAATTTAAATTTACCTTGATGGATCTTGAATTGAATTAAACCATTGATATACTTGAGTGGGAAAAATGTGCTACGAGGTCTATCTCTTGTGTTAAGTTTTATTTAAGAAATTATTTTCCTTGACCGATCTTTGTTAATATTTTAAATAGATGAGTCCATTAATTTTAACTACTCTAACCACATGGCCTGATGCCTTCAACTGCTCAAGTCAGCCTTGGAAGGTTTCAAACACAATGGGTGAAACCACCTGGTTTAATTTAAATCTCAATTGATGGTCAATGGAGTTCATAATTGGGGATTAGAACCAGCGGTCTTGAGTAAACGGTAATTAATGTATGAAGGAGTTGAACCCCTCTCCCATGCACTGTATGTAAGTTTCATTGATCGGATGAACTCTTAAACTAATCACTTACGTGTAGGCATTTAGCTTCTCCAGTCATGAACATATAGTTTAAGCGATTATGATTAAATAATCAAGTCAATATTCAACCGTGTTAACCGAGAACTTTCCTATGCATAGGAAACCAAGCTCACTTTCCTGTAGCATACGTTTGCCTTCCATTTGATCATAAAACCCTCTCAGTTACCACCAATCAATCACTTCCATTTTACGCTTGCCTTCTATTTAAACGCTTCTAATCTCCATCCTCCTTCCTCACCACCCTCTCTCAACCCCTCTCTCTCTCTCAATCAAACA
>VvCYP79A2a  (1500 bp)
TCCCCATCCCCTTAATTTCATCACAAGCATGTTGTGGACTGAGATGGGCTTGTACTGGGTCAATATGCTGCCTTATGCCTCGACCCATTGGAGTTTTATAGAAAAGTTCAACCCCAAGCCAGATGTTCTTTACATGGAGCTAGCCCACTGCACGGGAGGTGTGTGGTGAAGAAAAAGAATGTGTGGTGATGGTGGTCTTTTATGGAGCGAGCTAGCTAGCCCACTGCCAACAGAGGGCCGTGGTGGTGTTCAGTGTTCTTTTCATGGAGCCCATTGCATGGCGTTGGTGGGAGGCGAAGAAAAATGAAAAAGAAAGAAGTCCTTCGTCTCCTGCCCAAAAGAAGCTGCTCTGTTGTTGCGTGTCCCTCGAGTCTCACCCTCTGTAATGAGCGCCGCTCCGCGTAAGTCTCCTAGTAAGTGACGTGCACGTGAAAGATCGGGAAAAAGTTTTAAGAAATAAAAAAATAAAATAAAAATTAATATGTGAATTTATTCAGACTTATATGAAAATCAAGTAAAGATTCAAAATTAAATAATTGAATTAATCATAAAACTAAATTAAAAAATAATAATTGAGATTACATACAAATAAGATTACATTTTTCAGTACCCAATTTTATGATAAAAAATTAATTTTTAATCAATTTTTTATATTAAATAAATAAATACCACATTGATCCTTGATCATAACATTTACCAATTTTAATTTAAACATATTATTTATTTATTTTATGCTAAATTTGTAAAAAAAAAATTGTGTTAATTATTTATATATAGTTTAAATACTCTTTTTCTTTTTATATAAGAGTTTTTTTAATTAAAAAAATAAAAATAAAAATGAATTAATCTTAGCAAGAAATTTGTGGATTAAAAAACATATTATTTAAAAAAAAATCTCAGACTGATAGCAGACAAAACCTATTGAAAGAGTTGAAAAGAAAATTTTGAAAAAATAGAGAATGACAAAAAAAAAAAAGGAAAATTTTTCAAATTTTAAGGAGAACAAAATTTATAATGAATGAGAAATTTGAAAAGTTTTCAAACTTTTAAAGATAAATTTTTATGATATTAATTATATTAATTGTGTGGTTTTAAAAAAAATGAAATTCATAAGTTTAAGACAATTTTGAAATGAAAAAAGTGAAGAGTAAATAAAAAAATAAATTAATGATTGGTTTTCATACACTTTTTTTTAAAATAAAATAAAATAAAATAATTTATATTAAATTTAAAATTCTTATGAAAAAATTATTGATTTATATTATGTTCATTAAAATTTATTTTTAAAAACTATTGTTCTAGGACTGTTTTAAGATACAAACACTTCCCAAACATATCCAAAATTATTAGTCAAAACCTATTTAGATAAAGCAAAAATCTCCCAAAATCCAAGTAGGTCGCATAAATCCATTTACACGTCTTTTATAGCCAGCCAGGCGACCTAATCATTTATCCAAAGGACCAAGCCAGCATTGCAGAGAAGATTAAGCCAACTCAACC
>VvCYP79A2f  (1500 bp)
TGAATAAAAATAAAATTATCGAGAATTATAAAGAAAACTCGATATTTTAACACACAATATTTAAACTTTATGATAAATTTTTTTAATTATCAAATTGAATAAAATTAAACAAACTCAATTATTAGGTGATGGATAATAAATTTCTTCTATTAGCTCTATGAATGCTAGAGTCTAGAGAAGATTGGAAAATGTTGACACAAAAAGCTATTTCTCAAAGACCTTGAAAAAGCAAAAAAATTATCAAAAAGAGAAGGAAAATCTTATTTTTTGATTTAATTGACAACACCTTTTAAAACAACTAAAGTAAAAGTTATGGGTGTATTTAGTATGAATAGAAAAATGTTTTCAAATTTAAAAATTATGTTTGCAAAAGTTTAATTGAAATTAATTTTTTCAAATTTGTTATGAAAATAGATTAATTTAAAAAAAAATAAGATGTTTTAAGCTATTTTTCATAGGTTTTATGCATTAAGATTAGAAAATTAAAAATATTTCAAAAATGTTTATATTCGGGGTAAGAATAAATTGAGAAAATTATATTAATTTATGTTTGAGTTTTAAAATAAAATTTTATTTTTGAAAATAATTGAAAACTATTTTTTAAAATTATTTTTAAAAATTGCTATTTTTTAAACTACATGAGTCGTTTTCACTCGATGTGTGACAACATATTTATTGCCATCCAATGGACTTGTAATAGTAATAGTAATAATTGATGATAATTTATCACATTTTTATTGCAAGTAATAGTAAGAGATTAATTAAAACGTTTTTCTTTTCATGGAGAGACAATGGTCTTTTCATAAAAAGTTTCCTCCCTAAAATCAACGTACGCCACTTGGAAGAAAATAATAATAATTTGTTGTATGTGTCCAAAAAAGTGGTGGGATTTTTTTAATGGGGCTTAGGATTAGGATTAGGAGGGATCCAAACTATATGGTTCTGCACCTTCACATTTACCATGTGTCACAAAATGGAGGCATTTTTTTTATTGGGTTAGAACAAATTTTATCCTCTTAAGATCACTGACAAGAGATTACATTATCAAATTCAATTGTTTGGATATGGGTCGACCGTATTTCCCTAAATATTATACCAATTTATCCTACCAGACCATGCCACCCCTGTCTGTTGGACCAAAATCTAACATGATTTTGACCGTACAAGAGGAGTAATCCTACCATTGATGGGAAGTATGAAAGGCCTGTATAGTGAAAGTCCATTTGCCTATAAAGAGAGAGCAAATGTATGGGAGGTTTCTCATGCATCCTAGTACTGAAGATCAGCAAGAGACAAATGATGATGGGTAGCAGCTGCAACTCAACCATGTCTTCTTCATTTCCAAATTCATTCCTCTTCCTGCTCTCTCATAATTCTGAAACCTTGAAGCTCGTTTCACTTCATCTTCATTTACCATTCATCCTCTTGCTCCTTTTCCTTTTCTTTTTCGCTTTTCTTATCCTCTACAAACTCAAACCCAAAACCCTAATCACCAAGCCA
>VvCYP79A2g  (1500 bp)
TGAATAAAAATAAAATTATCGAGAATTATAAAGAAAACTCGATATTTTAACACACAATATTTAAACTTTATGATAAATTTTTTTAATTATCAAATTGAATAAAATTAAACAAACTCAATTATTAGGTGATGGATAATAAATTTCTTCTATTAGCTCTATGAATGCTAGAGTCTAGAGAAGATTGGAAAATGTTGACACAAAAAGCTATTTCTCAAAGACCTTGAAAAAGCAAAAAAATTATCAAAAAGAGAAGGAAAATCTTATTTTTTGATTTAATTGACAACACCTTTTAAAACAACTAAAGTAAAAGTTATGGGTGTATTTAGTATGAATAGAAAAATGTTTTCAAATTTAAAAATTATGTTTGCAAAAGTTTAATTGAAATTAATTTTTTCAAATTTGTTATGAAAATAGATTAATTTAAAAAAAAATAAGATGTTTTAAGCTATTTTTCATAGGTTTTATGCATTAAGATTAGAAAATTAAAAATATTTCAAAAATGTTTATATTCGGGGTAAGAATAAATTGAGAAAATTATATTAATTTATGTTTGAGTTTTAAAATAAAATTTTATTTTTGAAAATAATTGAAAACTATTTTTTAAAATTATTTTTAAAAATTGCTATTTTTTAAACTACATGAGTCGTTTTCACTCGATGTGTGACAACATATTTATTGCCATCCAATGGACTTGTAATAGTAATAGTAATAATTGATGATAATTTATCACATTTTTATTGCAAGTAATAGTAAGAGATTAATTAAAACGTTTTTCTTTTCATGGAGAGACAATGGTCTTTTCATAAAAAGTTTCCTCCCTAAAATCAACGTACGCCACTTGGAAGAAAATAATAATAATTTGTTGTATGTGTCCAAAAAAGTGGTGGGATTTTTTTAATGGGGCTTAGGATTAGGATTAGGAGGGATCCAAACTATATGGTTCTGCACCTTCACATTTACCATGTGTCACAAAATGGAGGCATTTTTTTTATTGGGTTAGAACAAATTTTATCCTCTTAAGATCACTGACAAGAGATTACATTATCAAATTCAATTGTTTGGATATGGGTCGACCGTATTTCCCTAAATATTATACCAATTTATCCTACCAGACCATGCCACCCCTGTCTGTTGGACCAAAATCTAACATGATTTTGACCGTACAAGAGGAGTAATCCTACCATTGATGGGAAGTATGAAAGGCCTGTATAGTGAAAGTCCATTTGCCTATAAAGAGAGAGCAAATGTATGGGAGGTTTCTCATGCATCCTAGTACTGAAGATCAGCAAGAGACAAATGATGATGGGTAGCAGCTGCAACTCAACCATGTCTTCTTCATTTCCAAATTCATTCCTCTTCCTGCTCTCTCATAATTCTGAAACCTTGAAGCTCGTTTCACTTCATCTTCATTTACCATTCATCCTCTTGCTCCTTTTCCTTTTCTTTTTCGCTTTTCTTATCCTCTACAAACTCAAACCCAAAACCCTAATCACCAAGCCA
>VvCYP81D1b  (1500 bp)
GAGTGGGTTGGACAAAGTGCGTTGAGTGGTCGGTAGGAAAATCGGTGATATTTTCAAAAGAAATATCGAAATATCTGAAATATCCGTTGACTAGAGTGGTGTGAGTAGTCGATAGAAAAATCAGCGATATTTTAATATCTGAAATATCCGTCGATCGGTGACGAATATCATGTCGAAGAGGGCCTTCAAATAATAATAATAACAACAACAATAAAACTAAAAAAATAAAAATAAAAATTACCTTCGTTTGAAACCCTTGGTGCAATGGGTTTCATGGCAAAGAAAAATAGAGTGGGGAAGAGAGTCTAATGGTGAGGCCGTGTAAGTGTGTGGGAAAGGAAGAAGAAATGAAGGAAAATGGGGAAGAAAGAGAGAAGGGAGTGGGTTGTGTCTGGGGGAAAATGGAATGAGGAAGAAAGAGAGAAGGGAGTGGGTTGTGTCTGGGGGAAAATGGAATGAGAAAATAAGAGAACGAAAGGAAAAAGGAAATGGGAGAAGAGAGTCTGGAGTCTCTGCCATGGGAGTGGGAGTTGGGAAGAGAGGAATGAGTGGGTAGGTGGTAAGTGGGAAGTGAGAGGAGAATGAAAAAAAAAAAAAAAAAAAAAGGAAAAGAAAAGAAAGGAAGAAAATAAAAGAAATATATATATATATATAAAATAATAAAAATTAAGAATTAAAGGAGGTAAGTATTTAAATTTAAGAATAAAATTAAATTCAAAATTATTATAAAATTAATTTTGGAATAAATTTTAGGTGTATAATAAAAAAAATACTAAAATATGTTTAAAATATTATGAAAATAGTTACTTTTAATATATTTTAATATTATTTTTTCATAAAAGTGTAGTATAAGATTAAATATAATATATATATATATATATATATATATTATTTTATATAAATTTAAATTTTAAAATTTTAATAAAACAAAATATCAAAATCACAATCAATTTTTTTCTTTTTAATTAAAAAATATTAAATATTAAATATTTTAACTAAAAAAACATTAAAATCACGATGAAATTAAATACTCATAATAAAAAAAAGTTAAATTTGTTCATTATATATTTATTTTTATATTAGTTATTTATTATATATTATTATTATTATTATCATTAGTTTATATTTAAAATATTTATAAATAATTAAAATAAAAAGATGCAAGAGTGAAAAAATTGAAATTAAAAATTAAAAGCTAGAATGCAAAACCAGGAAAAAGAAAAAAAGAAAAATAATGTGGCATGGTTTTATTACGATGTTTTTGACTTGTTATGTCAGAAAAAACAAAAAGAGGAAAGTACGATAGTTGACAGGTGCGGGGAGAGAAGAAAAGTTGAAGGTAATCTTTGGATTTTGTTCATATTACTGTCGAAGTGTATGAAAGTTATTAAAAAATCTTTTTTTTTTTTTTATTTAATTTTTTTTTAGTTGTACCTTTGATCCAAGGATATAAATTGTATCTAAGCCTACCTTTCCGTGCACTCCTTCGACGATACTACC
>VvCYP81D1d  (1500 bp)
AACTAATTTTTTAAAAAATATATTTTAAAAATATATCATTTTAAAAAAATAATTTTGACATTAGTTATTTTTTATGCACATAATTTTAAATATATATATTTTTCAAGATGTTTAATTTTTAAATAATAGTAATAATAATCTATTTTTATGTTTTTGGAAAATGATATATTTTTTTTCCAAATCACTAAATTAAATTAAATTTTATTGAGGTTTACAAAAAGAATAAAATTTAAATTATTGTTTTTTTACTCTTTTTTTCGTAGTTAATAAAAATCATTTTTTGAAAGATAAAAAATTCATATTCTTCTTCTTAATTTTCATGCTTCTTCTAAGTTTTGAGCTTAAATAATAAACTTATATAGACTAAAACTTAATTTTTTACTTGACTTGGTCCAAAATACAATAAAAACAGTCAAAGGTGGTCGGGTCAAATGAATGCACGTGTCCCTTCCACATTTAAAGAAAAGTCAAAGGTCGTCGGGTCAAATGAATGCTTGTCGTAGACCCTTTCACTAATTCGTACTAGGTGTGTTAAGAATGGGAGGAAGGTGGCTTTTGTATTATTTTGGGTACTTTAAATTTGATTTAATGTTAAATACAACTTAATCTCATTAATTAATCATTATAAATATTTTATTGTTTTAAATACTGAGGTGTTTTTTTACTGATATTTTTAAATATTATTACATATTAAATGAGTCATCTTTATTTTCATAAAAATAATTATTTATTTTTCTTGTTTTATATAATTAGGATAAAAATATTTGAAAGTAATTTAAAATATTTTTAAACATCCAAAAAAATCAGATTACATTATAATAACAAAAATTTTAAGGATGATCTAATTAGTTAAAATAATTAATAATTATATCATAATTAAGTTTTTTAATTATACTTGATTGCTAAGAAATATTAAGAATATTTTATGTAAAATTTTATTAAATACTTAAAATGTGTTTGATAGTAATTTTAAAAAATGTTTATGATATTTCTAATATTTAAAAATTTTTATCTTTCATAAAAACACTTTCTAAAATCACTATCAAACGGATTTTAAAAAATCTATTTAACAGTGATTATAAAGAGCGTTTTTAACACTTTTAACACTTAAAAGATAAATTTTTTTAAGTATTAAAAGTATTAGAAATGCTTCCTATAATAACTAACAAACCACTATTAATGACACATATTTAGATATATTAATTTTTTAATTTAAAAGTTAAATGGTTAATTTATCATTTCTGAAATTTTATATTCTAGTAATCATTATCAAGTCATAAACTTATTATTTTTAATGTTGATTAAATTATTGATTGTAGTGAATAATTAATTAATAAGTGGAAATAAATATTATTAAGGTAAGGAATCATATCGCAAAAATTGAAATATTTGGTCCAAAACTTTCTCCTCTTTCTCGTTGATTATTCTATAAATAAAGCATAAACATAATGCAGTTGTATCTAAGCCCACCTTTCCTTTCACTTCTTCAACGTCACAGCC
>VvCYP81D1e  (1500 bp)
CAAACATGTTATTACAAAAAAATGTTTAAATTGATAATCAATTAATTTTTTTTTATAAAAAAATATACAAACTAATTATTGATCATCAAAACAATCTATTAAAGATTTTTTAAAAATAAGTTAACATGTGATCATCAAAACAAACAACTAATAACTTTATACATTAGGTAATGGGCTATGTCCATGACTTTCATCCAACCCAAATAATAAAAAAGGAGAATATACTATTTATGACATAGCATTTAAAGGATATGGTTTTTTTTCCTCAAAAGAAGGATTGAATCAGATTTCGTGAAATAGGATATTCCAATGTAACGAACCAAAAAAAAGACAAATCTTGTCAAGACAACGAGAAGTATACATCAATGAAAAAAAAAATTTAACACCCAACTTAAAAATTTATATAGTTTTGACAGTATCATGACAAGTTAAAATAACCTAATTAAAAAATTTGTAGACAGAGAGTGCTGATTTCGCCGGTCTTTGTAAATCTGATAGCATGAGCTGGCATCTTGACCTGCACCCATTAACAAATAAATGTTATACTAATATTGGCTCTGTCATCAACAACCTAAGAGTTAAAATAAAGAAAAAAGAATACTGGTGTCATCCACCTAATTTCAAATATGATAATGATATCCACTTTCGCCTTCTACTAAGATAGAAATTATATATAATTATTAGATTAGAAACATCTCATATATATTAATTCCAACTCTTTCATCTACACCTTGAATAAAGAAATTCTTCATTTTATCGAATGTCTTTGATACATCCTTATATTTCTTTTTACTTTATATTATATTTATGAAATCATTATCTTCATCTCATATCTTTTTCCGCTCATAACTTAAAATATCAAACCTACCATACAACTGAAATAATAAAAAACTCCATCAATGAGGTCTCATTTCAAACAAATTGGAATGGCAGTTTTCAAACAAATTGGAATGGCAGATGTATTCTATTATTGAGGTCTCATTTCAAACAAATTGGAATGGCAGTTTTCAAACAAATTGGAATGGCAGATGTATTCTATTATTGGTGGGCCTCAGAGGAATTTTAACATTTCAGCATTGGGCCTCCTATGCAGCCAAGTCGTCATGCTATCATTTAAGAAAGCTCTTCCTGCAGTCTGCGTTATGGAAGAGGAGCTGCACTCCACTGCCTACACTGCCATTGATAACCAGTTGGTGGCATTGAGATTCTTCACAAAAGATGGGCAAGATCTAGAAGATAATAGTACTGCTCATTGAGATTTACCCAAAAAGAAAAAAGAAAAAGAAATGAAGATAAAAAAGAGAAAATTGGGATTCTTCATTTTTATAATTGGTACAAATTAATAAAATATAATTTCATGGCTCACGAAAGCGAAACAAAACCACAGATGCTTTTTTGCATGTTAACAATCTAGAACACCTAAGCAAAGATATATCATAAACAAATTTTGGCTTTATCAGGACTCTTAACAGCCTTCAGATCTGAACCCATCTTTCTCTT
>VvCYP81D1f  (1500 bp)
CTACTCAATCGTACAAATGTCTTAAAAAAATATTAAAAATAGAGTAATCATGTAGGAAATTATTATTTAAGAAAAGAATCCACTAAGGTTATTTGGATAAAATATCCTTCTATTTTTTATTTTCCTTTTACATAAGGATTTCTCATTATTTTTATCTTACCTTTTTTTTTCTTTCCTTTAATCCTCACAATAAAAAAATTGTTATAGTTCTCATTATTCTCTCATCTCCTCTTTATTAATGGTCATGAAAAATGAATTAAAAGATATAAATAACCAATATTATTTTTTCTTCATATTTTTTTCTATTGATGACAAAGATTTCTAAAACCCTTACTTTATTATTACCAAACCAAGCAAAGGTCAAATGATGGCATACAATGGATCTCATGTATTTAAAATTATACCAATATAACATTATTGGTCGATTCTAACTCAAAATATTCACTTGCGTGTTTGGACTTCAGAGTTTGCGAGCGTGGAAAGGTTTTTATTATTATTAAGAATTACAAGAAGTTTTTAATTCTTCCACATTTCGCGTCGTGCCTGACATCATTCGTAGGTCTACCTCATGCATGACATCATTTTTTCTGGACTCCTTCTCTAATCGTACGAGCTGTTTTTTCTTTCCTTTCATAATTTCATTCGTGGGCAATTGAGGCAGGCAGAAAGGGAGGATGCAGTCAAAGAAGTCGGATGAGAGATAGTGGGTGGTTTTTGTATTTTTTTGGTACTATAATTTGCTTTAAGGTTAAACACAACTTAATCTCATTAATTAATCATTATAAATATTTTATTGTTTTAAAATTTAAACACTGAGCTTGTTTTTTTATTGACATTTCAAAATATGATTACATACTAAATAAATCAGATTTATTTTTGTAAAAATAATTATTTATTTTTCTTGTTTTATATAATTAAGATAAAGATATTTGAAATAAAAAATAAGTAATTTAACATATTTTTAAATATCCCAAAATATCAGATTACATTATAATAACAAAAAATTTAATGATGATAAAATAATTAGTAATTATATAGTAATTAAAGTTTTAAATTATATTTGGTTGCTAAGAAATGTTAGAAATATTTTATGTAAACTTTTATAAAATACTTACTGGGTTGTATGTGACACATATTTGGATGTATTGATTTTTTATTTAAATGGTTAATTTATTATTTTTAAAATTTTCTATTATGGTAATTAACAACATCAAATCATACATTTTTATTTTTAATATTAATTAAAAAAATTATTTGAGTGAATGTTTACATAAATGTGAATTGGGTTTTGGAGTTATAATTAGAGAAAATATATTTGAATTAATGTAGATAATTCAAATATTATTAAGGTAAGCAATGAAATCATTAAAATTGAAACATGATCAGGTAAAAAACTTTGTCCTCTTCCTTGTTGATCATTCTATAAATAAAGCATAAATAACCAGGGAATGCACTTGTATCTAAGCCTACCTTTCCTTTCACTTCTTCAGTGTCACTACC
>VvCYP81D4b  (1500 bp)
TATTCACTTGAACTTTATTGCAGTTGGGTTTTATTTATAAAGAACTTAATTGGAGTAAAGTTCTTGATTAGAATATTCACTTGGCCAACTATAGTCAAGTCATTTTGAATAGCTAACTAACATGATATATAGTAATGAGACATTAACTCATTCTAATGTTTTAAAAATGATACCAAATTAGTTTATGAGACTATAAGGTTGGTTCCTTTGTAATATCAATTTATAATATTAAATGTGAGGAAATAAAATATAAAATAAATTAAAAGGTTGATAGAATAAGATATATTTAACTCAAATAAATTTTCAATATTTTTTATTTTATGTAGCTATTTTTCAATTAATTTCCAATAAATAACGAAAACAATTAAAATCCCTTATTAGAAAATAGTATGATTCTTAAGAAGACAATTTATTATTAGACAATTAAAAGATTATTCAACGTGTTTGGACTTTGGATTTTGTGAGCGTGGAAAGGTTTTTATTATTAAGAATTACAAGAAGTTTTTAATTCTTCCACATTTCGCGTCGTGCCTGACATCATTCGTAGGTCAACCTCATGCATGACATCATTTTTTTTGGACCCCTTCTCCAATCGTAGTAGCTGTTTTTTCTTTCCTTTCATAATTTCATTCGTGGACAATTGAGGCAGGCAGAAAGGGAGGATGGAGTCAAAGAAGTCGGATGAGAGATAGTGGGTGGTTTTTGTACTTTTTTGGTACTATAATTTGCTTTAAGGTTAAATACAACTTAAGCTCATTAATTAATCATTATAAATATTTTATTGTTTTAAAATTTAAACACTGAGCTTGTTTTTATTTATTTATTTATTGATATTTCAAAATATTATTACACACTAAATAAATCAGCTTTATTTTTGTAAAAATATTAATTATTTATTTTTCTTGTTTTATATAATTAAGATAAAGATATTTGAAATAAAAAATAAGTAATTTAACATACTTTTAAATATCCTAAAATATCAGATCACATTATAATAACAAAAAATTTAATGATATAAAATAATTAGCAATTATATAGTAATTAAAGTTTTAAATTATATTTGGTTGCTAAGAAATGTTAGAAATATTTTATGTAAAGTTTTATGAAATACTTATGGGTTGTATGTGACACATATTTGGATGTATTGATTATTTATTTAAATGGTTAATTTATTATTTTTAAAATTTTCTATTATAGTAATTAACAACATCAAATCATAAATTTTTATTTTTAATATTAATTTAAAAAATTTATTTGAGTGAATATTTACATAAATGTGAATTGGGTTTTGGAGTTATAATTAGAGAAAATATATTTGAATTAATGTAGATAATTCAAATATTATTAAGGTAAGCAATGAAATCATTAAAATTGAAACATGATCAGGTAAAAAACTTTGTCCTCTTCCTTGTTGATCATTCTATAAATAAAGCATAAATAACCAGGGAATGCACTTGTATCTAAGCCTACCTTTCCTTTCACTTCTTCAGTGTCACTCCC
>VvCYP81D2a  (1500 bp)
AAGAATCACTTTTGATTTTATAATTGTCAAATGTGTTTTTCTATTATTTTGTTTAGAGGAGGAGTATTGTATTTAAAAACGGTTTTCAAACATAAACTCCTATTTGATTACTATTTTAGAAAAAAACTAAAAAATAATTTTTGAAAATAATTTTTTAATGTTTTCTAAAATAATTATTTGTTTGACAATATGAAAAAAATTTACTTTATTTTCTATGTTTGATATATTTTAAAAATAACTTTTATATATAGTATTTTATTTTTAACAATTCTTAATATTTATATAATTATTTAATAAAAAGTCCTTATAAAATAATTTAAACTCAACGACGAGAGAAGACTAAGGAGTGATGGAAAGGTGTGGAAAAACGGTTATTGGATCTTACAATAAATGTTGCCTAGTAATTGCATACGTGTTCTGAGAACACATTGACGGCTTTGAATTTAGAAACTCCACTTGGACTACCATGTGTATGATCCTATGTGACAAATCCATGTAAAATCATTTCAAGGGAAGCAGTGGAGTAAACGTCACCTACGTATTCGAATGGAGGTGGCCATCCATGATGACTCAAAACAGTCAAGATTTCAAGTTCATCGTCTATAAGAGTTGATTGTAATCCTAGTTTTTAGTTACATGGTTTGTACCTAGTTCATCGTGTACCAAAAAAGTGGAGGTAAATATTTTCATTAGATGCACTCAATCTTCCTTTCGACAAATACAAGGATGATGAGTAGATAACCTGGCAACCCGACAAATACAAGGATGATGAATTGATAACCTGGCAACCACGTAACCGATACAAGGATGTGAAACTTTTCTTGGAGAAATACTCTATGAAACATCCAAGTTTATTCACCACCTACCTCCACCTTAACAAAATGTACATTTCGATCAATGTAGATATAAAATTTTTTTTTTTTTTTCATTGTTTACATTCTTTGTGGGTGTGCGTTTATCATTTTGACGGGGTCAATGATTTGTTAAAAGCCAAACTTTGTTTTAATTATAAATTAGTAAGTAGACCCCATGAAATATTTGTATGCTTTACCTTGTTGGAGAAGTTTTTTAGAGAAGCTGGTGAGGCACTTCCACGTTTGCCATATTCTAATCATCCAAGCAATAGCCCTTCAATAAAAAAACAGTAAACCCCCTTTTTCCCGGAAAAATGTAAAAGAAAAAGTTCTTTTTGGGACATAAAATAATTGATGACCTCTTTGTAAGTGAAGTCTCATGAAATAGAAAACTTTTAATAATTTCTTTTAATTTTCATAAAAATAGAAAATCATAGAAGCCTCAATCATTACGCATGAATACTGGCAGCATAAACACAGGAGCATGCATTTAAAAATTGCCATGGCCTGCTAATCAGCAAGGCGGTCAAAGCCTCATTGGAGGACCCATGGTTGTCGGCTCTAAAAAATTTTGCTTGGCAAATGAACGGACAGGCTCTAATCTATATTTACCCAGTCGTCCTCAAAGATTTTCTTCACCAAAACC
>VvCYP81D3a  (1500 bp)
CCAGATTCTAATATTTTTTAATAATATTCATACCCACATTAGACAATCATATAACGTTGACAAACGACAAGAACAACAAAATTTTTATAAGCAACTTTGACAAATCTAGATGATATGTACCTAACACCAATCAACCACTTCACCGGTTGACCCTAATTCAAGTTCAAAATCTTCCGGTCAAACAAAACGGTATTCCTAATTTTTCAGAGATATGGTAATGAAATTAGAAGTTGAATTCTTGTTTAGACCAAGACAAGCATTAATTTCCAGGTCAAAAGGTGATATTCAGATGAGTTGGCCTCTGTGAAAACTTAAAAATGGAATGAATATTGGGAACGAACCATATGTAGAAGACCAGGAAGCGGGTGAGACTTTCAAATATAGGCAACTTTGAACTACATGCATGTATTGTTGATTAATTAACGAGCGAAAGCGTGCAAGTCACCCTAAGATATGTATAACTAAATTCTATAACTTATTTTTTCAGTCAATTATATTATTTAATTACTTTTTTTAGTAAATATATTAACACCATTTCTAACCTTTTATTAAATAAAAAGATCCCTTCAAAGATTCCTTTTTAGAATGATAGGCTCTGAAATTAAATTTGTAATTAAAAGTTATTTCATGATGCCAGCACCAAGGCTTGTTGCGTGTACATGATCACATTTCTATTCCAAATGTTTTTAAGAGAATTAATTATCAAATATTTTTTAAGAAAATATTATAAGTGATTTTTTAACATTATAAATAAATTTTCAGATTTTTTAAAAATATTTCCTAAAATTTGTCAAATATCGATTATTTTTCAAAAACATTTTTTAAGCTAAAAATATTTTATAGAATTACTATCGAATGGACTCTAATAATATGTTTAATAGTGATTTTAGAAAACATTTTTAGCAATTATAATACTTGAAAAATAAAAACTTTCAAGTGTTTTAAAAACTAAAAATGTTTCCTAAAATCACTTTAAAACACAATCTAACAGTGTGTTTGACAATAATTTTAAAAAGTATTTTTAATATTTTTAATACTTGAAAAATAAAAAATTTCAAATATTAGAAATGGTGGAAACACTTTCTAAAATCACTATCAAATATACTCCAAGAGTTCATTTGACAATGATTCTAAGAAACACTTCTAATATTTATAATAGTTGAAAATTTTGATCATTTAAATATTAGAATGGTTAAAAATATTTTTTAAAATCATTACCAAACACACTCTATCATGATAGTGATTTTAAAAAGCGTATCTAATATTTTAAAAACGCTTTCAATCTTATTCAAATGTTAAAAAAAAATTAAAAACATTTTTTTAAATGATTCAAACGCAAAATAAGACTTCGTCCTCATTTCATTATTATTATGTTTTTATGGGTTCAAATGTGAAGCTAGCCGGCCAAGCAATAAAAACTGGTTGACAAATATTATAAACCATGCATATATAGATCGAGGACCCATATAGCTCTCGAGCCCACAAACAAAAATCACAGAG
>VvCYP81H1  (1500 bp)
CATTCTTTAAACACACAGAATCTAACATTTATATCAATGTTTTTTGTTGTTTCATTAATACAACCAATCTTGAATTGGAATTTAATTCAGTCAACAAATCAAAACCATAAGATTTTGAGTCATGTGTTTTTGCCTTATTTTTCCCCTCTACACGTGTTGGATACGAAGCATATGAGTCAGTTAACTTTGACTCAAGGCACAAGAACAATAATGAATTCCATTACTCTGATGGATGACCTTTGGACCCATTCCTTAAGGTCTGATTGGAACCCACCCAATCAAACAATTGATTCTGGTACTAAAGGTTTCCGTCACTAACAGTAACAAATTTCCTCAAAATCCTCGTGCAGATTAATCCAAAGAATAGATTTGAAGATTCCATGTCTCATTCTCACTTAGATACAAACAGAAAAATCATTCCTTTTTTTTTTTTTCTCTCTCTCGTTTTTTAGAAGGGATGAAGATTATGTGGTAGTATATCTCAAATAAAATCTGCACCTATCGTTCTCACACAAATACATATTAAAAATCATTCCTTTTTTCTTGTTTTCCACTTGTTTTTATGGAGTTGATCGTGTGTTTGGTTCAGATTAAAAAATCAATTAATCTACAGGTTTTTTCTTTTATGCTAGAACTTTAAACCTAAGTTTTTCTTCCCTACAACTCAAAAAAACGCAGTTCATAAAAACCATAATACAAAAATGTTGAAACAATCAATATAATGACATTAATAAAAGAAAAAAGATGATAGATCTAAGAGATTTTGGCTTACCTAAGAGTCCACAAAGAGAAGAATGTCGGTTGTGAGCGTGTTGACTATGGGTGAGAGAAAAGATAGAAGAAGATTATGATTTTTATTATGTATAGGGTTTGTATACTGAGATTTTTTGGATTGTGGGTGTCATGTGGAAACAATGGGCTTTTTATATATTGGCCTTCATTATTAATTCTAAAAGTGGGCTCAAGTAGGCTCATTAAGTTATAATACTTAAAAAAAATTATTTTATATGATGTCACTTCCCGAAAAATGACACTACTAATATAAAATTAACATCATCTAACTACCTCAATGGAAGATTTTTAATATGATGTGTCACCTTTATTAATTATAAACCCTATGGTATCATTATTTTAAAAGTGACACCATAAATTATTTTTGTAGTAGTGGGAAGAGATGAAACACAACCTTAATTCAACACTGCCATGTGGGATTCATGTAGATTCGTTCTAGGTCAAACCAATTGGGTTGAATACAATCCAAATATCAATTTATTTATTTTTTAAATTTTCCTCATTATTTTCTTTCTAGAGTCAACTTGGATAAATATGATGATACCTTGCTTTCTTGAATCTAATTTACAGGTTTCCACCATATGTCATTGTCCAATTGGGTGTGCTTAGACTTCTTCAACATTTTCTACTATATAAATGGTTCGTAAACCATCTATATCAATGGATATTAAGAACCATATTCTTCCCACACTCACAAAAATTACAAAG
>VvCYP81D2b  (1500 bp)
ATAGAAGTTAGAGGACTAAAATAAATTATTTTATCTCCGTTCTAAAATTTTGAACAAAATAATTGAGAAAGCGAAAACTAGACAATAAGAGAGGCTTATGTCAATTGACTGAAAAAACAAAATTATTAAAAATTAATTAAATTATCCCACGCCCTAATGTCAACTCTCTATCCATTCAACTTTTCCTTCGTCAAGTCATCTATTCATTAACAAAATGCACCACCTTAACAAAATGCACATTTGGATTAATGTAGATATCAAATTTAAAAATATATTTTCATTGTTGACATATCCATGAAATATTGTTTTTAAACTTTACCTTGTTGGACAAGGTTTTTTAGAGAAGCTGATGAGACACTTACAACTTTGTAATATTCTAACCATATTCCAAGCAATAGCCCCTCAATAAAAGTCAGTCAACATCTTTTTTTCCTGGAAAAAAATATAAAAGAAAATCCTCCGGATGCATAAAAAATGGATCTCTTTATAAGTGAAGTTTCATGAAATAGAAGACTATGTTTGGGAATAAAAAATAAATATTGAAAATTATTTTTTAAAATTTTATTTGATAGTAAAAGTGTATTTGAAAATTTTAAATATTTTTAATTAAAATAACTTTTAGTAATTGTATTTTATTTTTAATCATTCTCAATATAATTATTTCTGACAACATTATTTAGAACATAAACGAAAACAACTTAAAACGAATCAAAGATGGTATCTAAAAATATTATATTTTTATTTTTTAAAACAAAAAGTCACTTTTGATTTTATAATTGTCAGATGTATTTTTTTATTATTTTATTTAAAGGAAGAATATTGTTTTTAAAAATAGTTTTCAAAAGACGTAAAGTCCTATTTGATTACTATTTTAGAAAAAAGTTCTAGAAATTTATTTTTTAACATTTTATAAAATAAATATTTATTTTATAATATTTTTTTTTTATTGATATATTTTAAAAATAACTTTTATATATAACATTTTCATGGAGGAATAGTCTATGAAACATCCAAGCTTATTCACCACCTACCTCCACCTTAATTAACAAAATGTAGATTTCGATCAATGTAGATATCAAATGTGTGGGTGACGGGGTCAATGATTTGTTAAAAGTCAATACTTTGTTTTAATTATAAATTAGTAAGTAGACCCCATGAAATATTTTTATGCTTTACCTTGTTGAAGTTTTCTAGAGAAGCTGGTGAGACACTTCCACGTTTGCCATATTCTAATCATCCAAGCAATAGCCCTCGATAAAAAAATTAATTTGCATAAAAATAGAAAATCATAGAAGCCTCCATCATTACGCATGAATACTGGCAGCGTAAACACAGGAGCATGCATTTAAAAATTGCCATGGCCTACGAACCAGCAAGGCGGCCGAAACCTCATTGGAGGACCCATGGCTTTCGGCTCTAAAAAATTTTGCTTGGCGGCTGAACGGACAGGCCCTAATCTATATTTACGCAGTCGTCCCTAAGATTTTCTTCACTAAAACC
>VvCYP81D3b ��1383 bp��
GGACACTTTTTGGGTCCTTTGGTTTGTGAAGTTTATCATTGGAATACGGCTTATAGCCTCCAGAGTATCGGCCCTTCCACCCTTCCGGCTTCCACTTTAGTTGATGATGTGCATGGAAATGCAGCAGACTCATCTTGGCTTGGGCTCACAGTATGCATTTGCTTCATTTGTTCATCCAAACAAATTCTCTACTTTTTGTTCCCTTCTATCCTGCTAACCTCATGTGCAAGTGATAAAGCATTTGGAATTTGCCAGGCTGCCAGTGAAATCCCCATCTAAACACCCATAAACTAGTTATCAATGGCCATGAAATTCAAGTCATAATGCCATTTTATTAAATATCATAGTAATAAAATTAATACCTTGTCCACATAGACTCCCATGTAAGATTGGTGAAACCTATACCACTACTGCAGGATGCCACAATTCAACTTTCCCAAAAATGTTGGGGCAATAATTTGTTCATTTGCACGCCTACCTAATGAGCCCACTAAAATTATAAAAGAAAATCATATCTAATCAAATGAACTGTTGTGAGTTACCACATCTTTACCTCAGGCTTAATGGTGCTTGATAATTCTGAAAAAAACGTACATATTTAATAAAACTTAATATTTATTACTTAATAATTAAAATTGATTTTAAATCAAATTATTTTTAATTTATTAAATTAAAACTTATTTCTTATTTTTTACTTTAAACATTAAAATTGTTTAATGAAATTAACATAAAATTTATTTTAAATTATCAAATTAGCATGTATATATATATATACTCTTATTAATTATAATTAATATTTATCACCGTTATTTTTAAGTAATATTTATTTTCATTAATCTTAAGCAATTAATTTATTTATTAAATATTTGTACTTAAAAGTATTACTTTTATATATATATAAAATAAATTTAAAATATTTCTTATAAAAAATGAATTATAAATATGGAGTAATGATTAATAAATATATTTTCTTTAGATGTGAATAAATAAGATAAAAAAAATTTAGAATTAAAAATAAGTTAATTATTTTAATTTAATAATTAAAATAATTTTTTAATTTTAAATTAAAATATTAAGTTATCAAATATATTTAATCTATTTAATAACTTCAATTGAGTCATTAAATCATTTTAACCCGAGGAATTTTTATTTTTATTATTTTTTTATTTTCTCAAAATGTGTTTAAGACGGAGGTCATTGTTTGGAAGATATGACTTATGATTTATCTCATCCGATTAAATAGCTATTTTAATAGTCATTTCTAACAAGTTGTGTGGACTTAAAAAGTCGAACTTGAAACCAGTGGAAATGGAGTGTCGGGATGGAGGGCCGAGACTCCACCGGTAGCAGGGGCAGTCTGGCAGAATAGATATTTAGGCATCC
>VvCYP81D5  (1500 bp)
GAAATGTCAAAATGATAAAGATTAAGAAGAATTTTATGATGATTTTACTTTAGATTTTTATTCCATATTTAATTTTGATTATTTAATATTATTTCTTAATTTTAATGAAGATGAGTTTTTTTATAAAAAAATTTATAATAGATTTTTTATTTAATGGTGTTGTTTAGTAATTTTTATTAGTGATAATTAAGATTAATTAAAATTAGTTTATTTAATAAAAAATTCAATTAAAAAAATATTTTTATTCCATATTTACATCTTCTATTATTTGATAATTTTATTTAATAATATTTTTAATCAAAAATTAAATAAATTTATTTTTATTTCATATTACATTTTTATTGAAATTCATTAATATTATTTACTAAAATTAATTAGTAATATTTTGAAAATAATTAGGAGTTGAATATTTAATAAAATAATATTTTTTATTGATTTGAATTCACACATAAAAACACCCAACTATAGAATAGGTCTAAATTAATAATCTTGCTATTTAATTATAAATTATATTTTTCCATATGCTTATATATATATATATATATATATATATATATATATATATATATATATATATATATATATATATTTTAAAAAAAATTATTTCTTTTTATAAATTATATTTTATAGTTTTTATTAAATAAAATTAAAAAAATTAATTTACTATTAATTTTATCAAAAATAGTGTTCACGTACCTTGCACGTGGAGTAAACCTATTATATATATATATATATATATATATATATATATATATATATGTCCACGGTAACCATCCTAATTTAAACCGTAAAATTTTTTATATCTACGAATGCCTTCAAGATGCATCACATGAAACCCGATTTTAACTCCCTGGAAAATGTGGGAATACATAGAATTATTTGATTTGAGTAGTCCTGCTCCCACCGTACTCGGATTGGACTCTTAGTCAGAGTGGGGTGGGCTCTTCGGATAGAAGAAGAGTGGACAACGGGCACGTGAATAGCGTTGTATAACCATTACAAAATGAGGCAGAGAGGTTTTATAACGAGAGGAAAAGGTGAGGGTTTTTCAGTTTTTTTAGATGAGAGGAAGAAAAAAAAGGTTAAGGTGTTTTGATTTTTCAAAATGTGAAGAAAACAAGGAAGATTAAGGTTTAGTTTCAGGGTTGAGTGTTCATGCGAGATGAAGTAAATAGACAGTTTTTGTTTTATTTATTTGAAGTAAATAGACAGTTTTTGTTTTATTTGTTTTTCTGTTCTGGTAGGATATCAATAGGAGATAATTTTTTTTTTTTTTTTTTTGTTTCTTTTGTCTTTTCAGATGTGGAAACTGAGCTGGAGGATAAGGAAGGGCATCTTGGGTATAAAAAGCCCATTCAGCACCGAGTGCATCAAGATCTAATAATTTATCACATTTACGTATGTTTCTTGAAATTGGAAAAATTGGAGTTTAAAATCTCAATTATTTTGGATCGACCGCTCAAAACATAACTTCTCCGGCGAGGCTGAGTGAAATTGAGA
>VvCYP81D1l��1310 bp��
AACACTAAGATTAGGTCCTGTGGGGCAATTCATACCTCCCCGGGACGCATCAGATGATTGTGTAATAGAGGTTTCGACATCCCACGAGGAACGATGTTGTTGGTGGATTCTTGGGCCTTGCACAAGGACCCCCAGCTGTGGGAAGATCCCACAATGTTCGAGCCAGAAAGATTTGAAGGGCCCCAATCTGAGAAGGGCGGGTTAAAGTTCACGCCATTTGGCTTAGGTAGAAGGCAGTGCCCTGGTGCAGGTTTGGCAATGAGGCTAATAGTATTGTCATTGGGCACTCTCATTCAGTGCTTTGACTGGGAAGCGGTTGAGAAGGCTGGGTCTGAGGCGAGCGTGTCTAGCGAGTTCATGTTTGCACCTAGAAAAACTTCAATTCATGTACTTTCTCAGCTGTAAACTATTCCTGAGATGCTTGACTAGCTATTGTTCCGATGGTTTTAATTGCATGATTTGTAGCTTGTTTTAATTCAGTTGCAACCATATATATTGTGTGTACGAATGGGTGGTCATGATCCCAGTGATTATATGCTTTTCTCCAATAAAGTATTTGAAAATTTTAATGTATTTTGCAGGATGTTCGAACGTTTTATTGAAATTAACATTGTTAGTCAGGCAATAAATTCGAGTACTTGATAAAACCATATCTAAGCCCAAACAAGTCTGCCACTAATTCATGAATTGAACCCACGACGATGTAGCCAAACTGGGAGCTTCAACAAGCCCAACCAGGGATGGAACTGAATAGGCCTCTGACTCTCTTAAGGGTTAGCATGTAGGCCTTTATCTGGCTGAATCTGCCATGATAGTGGGGGACCATACCATTGGCTTTGGAATGGAGCAAAGCCTTAACTGAGCCCAAAGTAGATAGCTGATAATAAGTCCATATCAAAAAGGATAATTAAAGTGGGTGGCAGTAAGCAGCCGTATCCACAACGTTTTGAAGGCTTTAAATCCCTATCCAGACCAGCATGTTCATCGGATCTATCCCAAGATCTTTAAATCAACATCAACTAGCGTCCAAGAGAAAAATATAAAGGTCTCGATCGGCCGCATAAGTCATAACCATAAGGAGCACCGCCATGAAAAGCAAGGCAAATTTGTCTCTCTTAGGAATATCGGTGTTGTGGCATTGAACATATGGATCCACGTCACGACGTCCAAACTTGGCCTGTCAAAGACAGCATCTACAAAATGAATTGCTTTGCATCTAGGGCATTAAAACGGTTCCAGTTATCCTTTTATAACAAGGCAGGACTCGAACACTACTTCGAAGATCTTGGAACAAAAAGGAGAAAAATACA
>VvCYP81D2c   (1500 bp)
CCAGATTCTAATATTTTTTAATAATATTCATACCCACATTAGACAATCATATAACGTTGACAAACGACAAGAACAACAAAATTTTTATAAGCAACTTTGACAAATCTAGATGATATGTACCTAACACCAATCAACCACTTCACCGGTTGACCCTAATTCAAGTTCAAAATCTTCCGGTCAAACAAAACGGTATTCCTAATTTTTCAGAGATATGGTAATGAAATTAGAAGTTGAATTCTTGTTTAGACCAAGACAAGCATTAATTTCCAGGTCAAAAGGTGATATTCAGATGAGTTGGCCTCTGTGAAAACTTAAAAATGGAATGAATATTGGGAACGAACCATATGTAGAAGACCAGGAAGCGGGTGAGACTTTCAAATATAGGCAACTTTGAACTACATGCATGTATTGTTGATTAATTAACGAGCGAAAGCGTGCAAGTCACCCTAAGATATGTATAACTAAATTCTATAACTTATTTTTTCAGTCAATTATATTATTTAATTACTTTTTTTAGTAAATATATTAACACCATTTCTAACCTTTTATTAAATAAAAAGATCCCTTCAAAGATTCCTTTTTAGAATGATAGGCTCTGAAATTAAATTTGTAATTAAAAGTTATTTCATGATGCCAGCACCAAGGCTTGTTGCGTGTACATGATCACATTTCTATTCCAAATGTTTTTAAGAGAATTAATTATCAAATATTTTTTAAGAAAATATTATAAGTGATTTTTTAACATTATAAATAAATTTTCAGATTTTTTAAAAATATTTCCTAAAATTTGTCAAATATCGATTATTTTTCAAAAACATTTTTTAAGCTAAAAATATTTTATAGAATTACTATCGAATGGACTCTAATAATATGTTTAATAGTGATTTTAGAAAACATTTTTAGCAATTATAATACTTGAAAAATAAAAACTTTCAAGTGTTTTAAAAACTAAAAATGTTTCCTAAAATCACTTTAAAACACAATCTAACAGTGTGTTTGACAATAATTTTAAAAAGTATTTTTAATATTTTTAATACTTGAAAAATAAAAAATTTCAAATATTAGAAATGGTGGAAACACTTTCTAAAATCACTATCAAATATACTCCAAGAGTTCATTTGACAATGATTCTAAGAAACACTTCTAATATTTATAATAGTTGAAAATTTTGATCATTTAAATATTAGAATGGTTAAAAATATTTTTTAAAATCATTACCAAACACACTCTATCATGATAGTGATTTTAAAAAGCGTATCTAATATTTTAAAAACGCTTTCAATCTTATTCAAATGTTAAAAAAAAATTAAAAACATTTTTTTAAATGATTCAAACGCAAAATAAGACTTCGTCCTCATTTCATTATTATTATGTTTTTATGGGTTCAAATGTGAAGCTAGCCGGCCAAGCAATAAAAACTGGTTGACAAATATTATAAACCATGCATATATAGATCGAGGACCCATATAGCTCTCGAGCCCACAAACAAAAATCACAGAG
>VvCYP81D4d  (924 bp)
GGTCTAAATCCTCAAGCTTGTGGTTTTACGTGATTATGTTTAGGAAGGAATTTCATATCCCCAGATCTTGTGCCCATGTTGACTGAGTTCAAGCGCTACATGGAAATATGAGCATAAAGGGAGTTAATTTGTCTTGCCAGCCAGAGCATCAACCAAAATTCTATTTCTTTAAGGTGTTTGTAATTGAAAAAAAGGGGATATTATCAAATTGCTGTACAATGAGTTTGTGTTACTTATTCATCACTATAATGATTGTTGTCCCCCTTGAGCCTTGTTCTTCTGCTTTCCAGGGTTGAACTAATTGTTGTGTTAAATGAGTTCCACTACTCCAGAGAGACTAAAATCAACAAACTAGGATTCAGCTCAGTCTGAGGCAGACATGATGGAGCCACTGATTAATCTCTCACACAAAATATATTGTTGTCATTATTATTTCTTGGAGCAACTTAGTTCAGATGGAGTTACCGCATCACAATTTCTCCACAAGGACAACTCCTGCCCTTTCAAGGAATATGCCTTTCCCATGCTAAATGGTAGAAGATTTTCTTTATAAGAAAGCCGCCTAACAAAGCATAAAGTCCTAATGTTTGGAAAACTACAATCAAACATAACAAATCTTACTTCGTTCCTATCATCGACGTGGGCTAATAACAAAGGGCAGTGGTCCAAAAATAATATTCTACACAAGGAAAAAGTATATGAGACAGGCTAGGCTGGTCCCTTGATGGATAAGTCTGTCAATTTATGTCGAACATACAGTTTTTAAAATTTTGGGCAGCAGTTTGGCCTCATCAAAACATTGGATCCAGTTATCCCAAAGGCATCTAAGGAGATAAGAAAAAGCGTCAGGGTTGAATGGCATTGGTCTGCTCCATATATACATTTGATGGGTCCATATATACTAGAATAAACCATCAGTGATGG
>VvCYP82C3b  (1500 bp)
TGAACAAAAGCTGGCAGGATTGAGACAACAGTGATCACGCCTACATGGGCCCTTTCTCTTCTGTTGAACAAAAGCTGCGTGCTGAAAAAATAAACACAAGATGAGTTGGACGTCCAATTGGGAAAGCATCGCCTAGTGGAGGAATCAGCTATGAAGACAACTTAATCTACCTACAAGCCATTGTCAAGTGGAAACATTACGAGTATAGCCTGCAAGCTATTGTCTACTCCAAATGTTTGGTAGTGTTTATAGAACCTAAGGAGGTATGATCTTCTTAGCTTTTCTGTCATTAAGCAGAATGGAAAGTAAGAAAAAATGTGTGGCACAAACTTCCCCAATTAGCTCAGGCAGGTTCCCAACGTTTGGACTTGGAGAACGTGGGAAGCAAATCTGCTCACCTCATTGGTTTGTTTTGTAGGTGGTCTCCTTGCTTAAATGAATTTTGAATTTCTTAAATCATATCTTATCTGATCTGGAAAGTATTTTAAATTATTGAGGTTGTAGTTTATTTTATTATCTACAGATTAAAAAGAAAGAAAATTCTCCTCTAACTCCAACTTCCTCTCTATCTTTTCTACAAGCTAGTTTCTCTACAATATAGTGAGTTACACGGGTTCTTTGCCTAACAACTCAAGATCCTTTAAGCGGAGACAAACTAAAACTTCAAAAGCCCAAGAAACCGGATAATATTATAACCATATATAATTTTTCAAAATGATTTTCATTACATTCTAATTAAAAAAACTACCCAAATTTTGGGTCAAGATAATCAATTGGTGAATGAGACGGAGCAATTAGCAAAGTGGGAATTGGATTGTTTTGATGCACTTGATGGTTAAAAAGTTTAGTTAGAATTTTTTTTTTTTTTTCCTTAAAATTTGACACAATAAATTTTGGATCTTTGGTTGCCAGTTCCTTCTCCAAATTGGAGACATATTTTGCACATTGCATTCATAGCTAGATGCTACACTCATACTCCCTGCAATTGCCGTACCAATAGCTTTACTTTGGCTTATGATTAGGAAGAAGATGTGGATTTTGCAGAAGTGGACAATCTCGACTTTTTCGGCTGATAACTATAGGTTTTTGTTTTTAGTCTCCTAATTTTGAATGATTGAATCCATAGGGGGCTCCACCTCCACCTTTAAAGCACACTTCTCTAAAATATGTGTACCATGTGGTTCTCTAAAATATCTATGTACCGTGTACTGTGTGGCGTGTAAGTAAAGAGAAGTAAAACTTGATACCAAAATCAACACACCACTTGATTTTCAATGAACAAATCGTGTTATATAGGACTTGAAAGGAGCTTCATATTATTTATTATCATCTAGAGCTGTCTACACTAAATTAGGATGGCACATGTGTAGAGCGTGAATTCCTACTTGTGAGTGTTCTAGCGAATGTAGTTTTGAACCATTTTCGAAGCCTTTTCCTATTTATGGTACCTGAGAAAGGTGATTCTTTCCACTGACACATTTGCTCTGGTACTAACTAGTC
>VvCYP82C2b  (1500 bp)
GGCCATTAATGTAAAACCCACATATTTTGTAATTGACAAACTTTATATATGCTTTAAAAGTTATCCCTAAAGTGGAATCCTTTCTCTACCACTACTGTAGGGACCCCTCCCTCTAATGACATGTGGCACGCATTTCTATCCGGATCAGCTCCATTTGGATTTCCCTAAGAGGACACATAACGCGCTTCCCCTATCTGGACTCCCTCAGGAAAAGGCACACGACACTCGTAAACATCACATCCGAACAACCGACATATCTTATCCGGATATGTTTGTCCGGATCGTTGACTAAAGTAAGCAAGTCTTACTACATCCTTCCAACAGTTTGCCACGGCCCACGTTCCGCCACCTGCAGAGCGAAAGGATAAGAATGATGACAAGTCACTTCACACGATCTTTAACAGCCGCATCGCCTCCCACGATCTCTGACAGCCGCCCTAAAGGTGATGATGACCCTGCCACCACCTAGAGGCATCATGACGAGTCAAAAAGTCTCCCCACCATTAAAGAGGGAGGCAGAGCTTTTGTCACTATATATATGAACCTTCACACAAGGAAGAAGGTAAGCTTGTTATACCTAGAAAAAGGTCAACTGTGTCAACTGATTAATCTCTCTATCCATGGCTGACAAAACCATTGGAGGGTGTGTCCGGACACTCCGTCCGGACACCTTTTGCAGGTACGACTGATCCAGGACTCTATCTTGGTTGAGAGCGTGCGTCCATTTAACAACTACGTGGATCGCAGGGACGCGAGGCCTCAACAACTACATCAAGCTATGGTATTGAAAAACAATTTTTCAATACCATACCTCCACATGTTATTTAATGAAATATAAAGATTGGATAACAGGTATAGTAAAAGATTAAATAAAAGTTATAAGCATCTCCCGGTTACCCACCCATGTGGTACCGTGGAATTCTCCCACTAAACGACACTGACAAAAGCCTTTCTTTTGTTTATTTTATTTTATTTTTTATTACCTACCCATGCCGGACCGTAGAATTCTCCCTCTAAACGACACCTAGGAAAGCCTTTTTTTTGGAACTATTGTTACGGGGTTCTTATCCTTGACTTCGATAATGCGGCCACCAAGTCTCTTATTCATGCATCCTGATGAGTCATGTTTGGCAGGATCTTGCTGGTCAATCCAACAAACTTTTTTCACTTGCTTGTAGATGGTCCATGGTGATTGATTTTTTTCATATCAACTGACAATTGCAACAGACGAGGATTAGGAGATTGGAATTTTTGGATTACAGGAAACGTAGCACAAGAAATAAGCTAAATCTAACTTGATTCTATGGTTGAATTTAGGCTCTTGGCAAGTCAAATCAGTTTTTCGGAAAGACCAAATCAGCTATCTCATTCCTCATGTATCTCGAGTTAACTCATCTTATTTCTTTGAGGTCAATGACTACCTCATGATAACACTAAAGAGGACTTTCACCAAGGCACAAACTTACATGCAGTTGAACCCATCTAGCTACTTCGACTCTG
>VvCYP82C2c  (1500 bp)
TAAAAGTAAAGAATATTAAAATATATTTTATCTCTCCTAATATTCTCCCTTAAAACGAGTTTGGGTGTTTATAATAATACTCAACTTGCTGTGAATAAGATGAAACTAATTTTATTTAAAAATGCACGTTGATTATGGTTGCAATTTGGTTCCAATAATATTAACTAGACTCAATTTTTCTCTCAAACAAAATGTCATTCAAATTTTGACAAATATACAACTTATTTAGATATATAAGACAACTAAGTAAGGCTTCTAAGATGTAGGATATGTGGTGATGAAATGCTCATCCATGGAAGACAAGTGAACCATTACTCAACACAAATATTTGAGTTTATGATCAAGATCCTTGATAAAAAATTTGTTAGCTGTTGGACAACATCTTTGCACATGTGCGCGCATGCACGTGCACACACACATATAGATATATATATATATATATATTGGTGCTTGATATCTGATGTTGGGAATTCCAATGATGTAGTCCAATAATGTTCTCTTCTAAAATAGTGATTGATATGTTCTTCTTGTTAAAAACCTACACTAAGGCCTATATAGAGCTAACCTCAATCATGGCCTTCTAATGATTAAATGGGTGTTTGATAAAACTTAATACTTATTAATTACTTAATGATTTAAGTTAACTTTAAGTTAAATTGTTCTTAAGTTGTTAACTTAAAACTTATTAATTATTTTTTAGTTTAACTATTAAGGTTATTTGATAAAGTTCAATTAAAATTTATTCTAAATTATCAAATTGATACATTTATATAATTTAACTAATATTTATCCTCATATTCATTTCATTAATTTTGAGTTATAAATTTATTTATAAATATTCATATTTAAAGTATCATAGATACATAAAATAATTATAAAATATTTTTATATAAAATAAATCATGGATGTGGAATTATAATTTAAAATATACTCACTAATATAGATAAATAAGATAAAAAAAAGTATTTAAGATTGGGTATAAATTAACTATTTTAGCTTAATACTTAAAGTATTTTTAACTTTAAATTAAAATATTAAATTATTTTATTAAATATATTTAATGTCTTAAATTAAATTGTTAACTTATATTAAATCATTAACTTGATTTACCAAACATCTTTTTTTAAGTAAAAAATTGAGGCCTGAATTAGCACAGAACTCAAAGTTATACTCTGTAACATAAAGAAACTGTGTTTGGTGTTATTTAATTTATTTTGGGGGTGCGAAAGGGGAGCGGTTCTACCAGAACCGACCGGGTGGGCCGGGCACGCTGTTGGATGCTGCAATAGTATGATATTCAATTATTGGGCTTTGTGCATAGATATATTATATTATTATAGTTAACGGATGCTTGACCTGTTCCTATTGAAATTAATGAATTTAATAATTAAACAATATTTAAATAAATAAAAAGAAGTCTAGAGGGAGGAAGAAGGAGGAAAGTTCTAGCTACCAGTTTGAACCTAAATAGTGAATCAGCAGAGTCTCAGACAATCCAAC
>VvCYP82C2f  (1500 bp)
TCACCAACACCATCTTCAAATATTTTGTTTTGAGTTGAATAATTTTTGAAATGATTTCTGGGAAAAATTTGCAATCAGCCCAGCCCCTCTTGTTCACGTCATGAAAGTATAAAAAAAAGAAAAAAAAGAAAAGAAAATATTTTGTGCATTTTTTTACTATTAAAAATATAAAAGAAAATCACACATAATTTAAATTAGTTAAAAACTTATATATATTTAAATTATTTAATCTTTAAATAAAAAAATCAAAATAAATTCAAAGGAATTTGAGCTAACATTAAAAATAATTTATTGTTTTTAAATTAATTAATTAATTTTTTATATTTTTCTTTTAAACTTTCCTTAAAGCTTTTCTAAGAACCAAACATTACTAAGTGTTCAGGGAGCAACTCAAGACCCTAACCATGATCATACAGTTTTTAAGTTTGTGATTCAAGATGGCAGACACCAAATTGGCCAAATAAATTAAACCCAGTCAACATGGCCTTTAGTGGTGGCCGTGGATTCATCACCATGAATCATATTAGCGGCAGTCAAAGGGCCACGGGCGACGGGCCACCACCAGCAAAACACTTTCCTGTGGAACGCATTTTAAAGTATCCCTTATGTACTGTGAACAGATTGAATGCGAAAAAGTAGTTCTTCTTTGATTCACCAAGACACCGATTTCTTTTTAACCATACGTGTAAGACTAATGGCTGAGCTGGACATGTTTCCGGATATTGTCCAGGGCACTAGATATGCACTCATGGCTTGAATGAATCAATGATGCATCCAGGTTTCTACAGCAACTTTTATGCAGTACAGATGATGCATTATATTATAAACCATGGACTTGGAGCACTATGCCTTTGAAAGGTGGCAAAGTGGCATGATCTGTACTTCATAATTAACTGATGCTCGACAACCAGATTTCACTACACAAGAAAACACCTCAAGCATATAACGAATCTATAAACCTAATAAATATATGTAGAGTCAACTTATATATGAGTCCCTTTATCATATTTCTTTGTCATACCTAAAATGTTAGTGGCGTGTAAGCATATATACATACACGAAAGAGTTGACTTATCTCATCCCTCTGTCATTGGTAATATATATGAGGTCAATCTCAACATCATAGGCGTCCAAGTAGCTTCCTGCTACTCAAGATAAGACGAAACAGACAAAGCATGCTTTACATAAATGGAGAGCTATCGAGTTTCTTCCACCAACCGCTATAATGTAGGGAGGAACAAAATCTATGGTCAGAGAAATTTTAATGATGGTGGCTAGATAATTCTTTTATTTAATTTGGCATGGCATGGATTTTTAAGATAGAACTGAATAAGCAACTGGCCTGTAGTATATATCCGTCATATGTAACCATAGTGATATAAATAAGTAGACAAGGGCAATGCAAACCATGCCCCTTTACCAAACCGTGAGGCTAGCTTTTGGTGTGCGGCATGCTGTCTATTAGGTTTACCTACTGTTGGAATGGGCTTATAAATTAAC
>VvCYP82C4c  (1278 bp)
GTAAGATAGTTTAATCCTACAACTTTTGTTTAATATTTTGTTCTTGAAAAAATATTATGAATTTTTTTAGTGGAAGATAAATATGTGTTATTTGTGTTTTCTTTATGTTATTTGAAGTATGATTATTCTTAAGGTTATTATTATTATTATTGTTTTATGATTTACATATTATTATGATTTTATTTTTAAAATTTTTATGTTTGCAATGATTTAATTGAAGAAAAACTGTTGTGTTGATTGTTGAAAATTATTTAGTATGTTGGGAATAAATAAAATTTATATGATTAGGGTTGAGACTATGTTTTGATGATATGTAAATTATTGTGAATATATATATATTTTATATTTGTAGTGATTTAATTGAAGAAAAATTGTTGTGTTGTAATTGGAATTATTGATCATGTTTGGAGTAAATAAAAATTATGTCCTAGAAAATTATGCATAATAACATGCAAGTTTATTATATTTCATATGCATCATGGTTATGTGAAAAAAAAAATTGATGAAAGATTTTATAAAATGAAAAAGGAAAAAGAAAATAATGATGAAAAGTAAAAACCTGTGAAAGATAAATCAAGAAGGAAATGAGATTTCTAGTGTAAAAAATACAAAAATTTATCCCGTGAGTGTATTTGATATAGATGCATATCATTAAGTGAAAACCCAAAAACAATAGTTGAATGTAAGCATTTGCACCATGTTTTCATTTGGAAGAAGGACATGTATTAAATACTTGAATGACATCAATGGTATGTTTAAATATATTATTAGAGATTGAAATAATTTATTTATTTTGTAAGTTTAGAATTATTGGATAAACCGCTATTGACGATTGGACCGATGAATGGGGCGGTTTTTCATGAACTGCATGGCTAAATTCCAGCTCCAGTCTTCCTCCCATTTTTCCTTTCATCCAAATAGTCCAACCTCCCCCTCCTCTTTTTCATAGGGTCCAAGTGAAAGCCCAATAAGCCCAGCCTTACATTTTAATGGCTTTTTGGCAAAACCTAAACCCATTTAAACCCATGGGTGGTACCTTTTTGGCATGTACTAATTTGAGTTATATGAATTTTTGTAATTTAAATTATAATTTGTTATTTTGTAAAATATTTTTTACTTAGATTTATGTAGATATTTGGGTTAATTTGGGATTATATATTGATCTATTCAACTGAAATCATTGACCGTCAAATTGGATAGGAATAACATTTAAGGTCAACCCTTTGACCTGATATCACTAATCGGATTCTGAGTTGCCTTGAATAGGGTGTGACTATA
>VvCYP82C3d  (1500 bp)
CAAGATTAATAATTGAACTTAATGTAAAAAGAAGTGTAAAAACTTTAAAAGTTTAAAATATCATTTCATTATTAGTTTCCACTTGCCAACATAGATTTCTCATTCTATTCTAACAAGTTTTTTGTACTTTTATATATATATTTCATAAACTTAACAAAGGATACAAACAGCAAAAGAAAAAAAAATAATTGAGCTACTAAACCTCAATATAAATTTGGGGTGAATTGTCAAGGAGCAGGGGGAAGTACTGTATCACAGATCAATGTGAAGATGTATATATATTTATAGTATAGAACCTAAGAGGTGAACGTTTCTTTCTAAGTTAGGTAAACATTTCTGTCAAAGTTGATGAAATTTTACTATAATTTATATACACATGCTTTCAGTGTGCATATAGGTTGAAATAATATGTGGAGATGATTTTTATATGTGATTTAATATTGTTTTGGATTATTGATTATGACTATAAATTATCATGCATGGAACTAATCAAAATGATATAATTAAATTATATTAATGAATTTGAGATAGACATGGCAATTATTAATTTGAAATATCTTATATGAACATAAAATTTTAAATATAGACTCATAATTTATATTAAAATAATAAAATTAAAAAAGTACGTTTATCTCAAATTTATGCCTAGGGCCCAAATTTTGCTGAGAGCCAGCCGGATGTCATCACATGCAAGAAAGCTAGGAAACAAAGCTGAAGTTTGCTTCTTGTGTGGGAAGAGGTACTTCCGTGCTTGACTGAAAGAAAGGATTTTCTACAAGAAAAATTGTCCCCTTGTTTGTAAAGCCTCAAGTTGCGACAGCAATAACGACAAAAGTAGGCCAAAGAATTTGTCATTATTATGAGACTAGAGAGGTTTTACTGAGAAGTTTTCCGAGCGTGATATCAGCATTCGCTGTATCACAGTGATACAACAAATGGTTTGAACACAGTGATCTAGAACCCATTAGCTCAAATTTCATTGATCTGAACACGATGATCCTCATCCGCAGACCATTTTAGGGAATGATTAATTCTAGCGATTTTTTAACTGCCTGTACGAAGAACTTTATCAAAATTGGATTCAGTGTATCTTAACCAATCTTGATCAGTATGCGACTGATGATTCTATTTGATAAAAGTAATGCGGTGGCCCAACTTTATCTTAATTTCCATGTTGAAACTAACCATTATATTATTCTATAATTATAAATATATACTATGGAATTAAGATAACTTTGACATGCTAAGGATCAAAAGAGGGCAGCCACTTTAGTTGTGGATTATACTAAATAAAGCTGATCGATTATTACATTGGAAAATAACATTGAACCTATCATGAAAGACAACCCTACTGGACCATGCCCTGAGTACTAAATGCTGATAAAAAACAAGTACATGTTCCAAAGGAATTGAGTCCATATATACTCATTAGTGCTCAAAGAGAAAAACTATATATCCACCGCTTAACTACAGTGATCCTTTGAGCAGAAGAAACTAGCC
>VvCYP82C2k  (1500 bp)
GTGTACTTAATTTATTTTGGTGTTCGAAAGGGGAGTCGGTTTTGGTAGCACTGCTTTGAAAACCTTTTGTGTTGTTCCATCATTAACAACTTTTTGTGGTTTTAATGATTGAACTCCGAAAACAACATTAAAATACCATTGATCGCAATTAATTCGAAATGATGGAACAAACCCTAAGTCTTTTCAACAAGTAAAAGACTTAGAGTTGTGAGGGGCACTAACGTTGCCAAAAATGAGCACCCCTAAAACGTATGTCATTCAAAATACATCCAGCTATAATCAAGTACCTAAAACATGTTTGTCTAAAATAAGCACTTACTTAATGTCCACATCTTATAACATACATGAAAAGGTCAAACTGACATTCAAAAAAAATAATTACCAACCCTTAACATTATCCCAAAAGGCTACAGCCCCATGTGAATCACGTATTTAATTTATTTTGGGGGCCCGAAAGGGGAGTCGATTCTAGTAGAACTGCTCCGAAAACCTTTTGTGTTGTTCCATCATTAACAACCTTTTGTGTTGTTAATGATTAAACTCCAAAAACAACATTAAAAAACCATCGGTCGCAATTAATTCGAAATGATGGAACAAACCCTAAGTCTTTTCAACAAGCAAAAGACTCAAAGCTTCGAGGGGTACTAACGTTGCCAAAAATGAGCACCCTTGAAACGTATGTCATTCAAAATACATCCAGTTACAATCAAATACCTAAAACATGTTTGTCTAAAATAAGCACCTACTTAAGGTCCACATCTTATAACATGCATGAAAATGTCAAACTGACATTTAAAAAATAAATAAAATAATTACCAACCCTTAACATTATCCCAAAAGGCTACGGCCCCATATGAATATCACATACTTAAGTTATTTTGGGGGTGCGAAAGGGGAGTCGGTTCTTGTAGAAACGTTTTGAAAACCTTTTGTGTTGTTCCATCATTAACAACTTTTTGTTTTGTTAATGATTAAACTCTGAAAACAATATTAAAAAACCATTGGTCGCAATTAATTCTAAATGATGAAATAAGCCCTAAGTCTTTTCAACAAGCTAAAGACTTAGAGCTTCGGAGGGCACTTATGTTTCCAAAAATGAGCACCCTTGAAACGTATGTCATTCAAAATATATCCAACTATAATCAAGTACCTAAAACATGTATATCTAAAATAAGCACCTACTTAAAGTCCACGTCTTATAACATTCATGAAAATGTCAAACTTACATTCAAAAATAATAATTGCCAACCCTTAATGTTATCCCAAAAGGCTAAAGCCCCACGTGAATATCAGGTATTTAATTTATTTGTGGGGCGCGAAAGAGGAGCAGTTCTACCAGAACCGGCCGAGTCGCCTAGGTCGCACGGTTCGATGCTGCAATACTATGATATTCAATTATTGGGCTTTGTGCATAGACATATTATAGTTAATGGATGGTTGACCTGTACCCGTTGAAATTAATGAATTTAATAATTAAACAATATTTAAATATATAAAAAG
>VvCYP82C4d  (1500 bp)
TAATTCTTTTTATTTTTCTTTATTGAGTTATCGAATTGACTTTATTTATTATTCCACTTTTTAAGAACAAGTGATATTGATGTAAAAGGATCGGGATAGAAATGATATTTTGATTAGAAGCAACTTTGGAATTGATTATTTAGGATTATTGACTTAAAGACTAATGTCATTTATAACTTCTACAATTTTTTATTTAAATGTTATTATTGAGCTATTTTAATTAGTTTTGAATTTATTGGTAATGTATTAAGCTCTGACATGTGAAATGAGTCTGGTACCTTTAGCTTTTGCGTTGGAGACTTTCTATTGGGTAGGCTTGGCCGAAGTCCCACTCTCAAATCACTACCATAAAAGTTGTTTCCTTGTTAGGAGAAATGTCCAAGAAAATTGCAGACTGAGGCCCCATGAACGAGAAAGGAGGTCAATTATTGAAGCACTCATTCATTTAGTTCTGCTGTGCAACTTCTGTTTATGCATCATCTTTATATAAAAGGTTTCATGGGAGGGCCAAGAGGAGATACATATGATCAGGCATGATAAAAGCATGGTGTTCCCATACACTTTAACATGATAAACAGGGCAAGGATTAATGAGCATTCTTGTAGTCATAACATCAAGAAATATCCCCCAATTGAAAGAGACTAAGGTAGTATTTAGTTTTTTAACTTAATACTCAATGTAATTTACTTTCAAAATTTTTAAATAGAAAAAACAAAAATATTTAATAATAATAAAATAATAAAAAATAAATGATTTAATATTTAATAGTATTAAGTTAAATAAAATTCCATTTAAATTTAAGTAAAAAAGCCAAACACGAAAGTATTAAACTATAGTATCCAATATTAGCCTTGGCCATTAGTTGAGAAGGTTGCTGTTCTCCTCCATGGATGCAATGACAGATTCTTCTGTGTTAAATTTATAAATGTTTTCTCTCTGCTTTTGTGTCATCTTGGTGGACACTGGAAGATCAAGCCATTTAAGTAAGACATTTTTATTGGGTTTTGGTGAGTGAATGATATCTCTGAGTGATACACCTTTTTTATTTTTATTTTTAGCTTTTACCTTATGTTTAATTCCTCGAAACTAAGAAGGAAAGCAATTTTTTTTTTAAATTATCTTCTCATATTAATTATTCTATATAAAATAGGAAAAAAATCAAATATAATTAAAATTAATTAAAAATTTATATATTTTCAAATTATTTAATCTTATTTGAAAAGAATTAAAAAAAAATAAAATGAATTGAAAATAACATATAAAAATAATTTATTAATATTAAATATATTTTTATTTTTTATTTCCTTCCATTTTTCTTCTTTACTTTCTTTTTCCCTTCCAATCAAACATAATGTTTTAAGTGTTTAATAAAATATTTAAACTCTTGTAAATGGTTGAATAGTACTACCAAAATGTGATTCACATGAGTTCAATATATGCTTTCCACCAGCTTATTTGCTTATAAATAGTCCCCCGTTCCTCAAACTTTCACCACCATTA
>VvCYP82C2l  (1500 bp)
ACTCTAGTACCTGAAAAACCGTTGGATAAAATTTGACATTCAACCAATTATAAGCAAGGGAGAATTTGACTAACGACTATGTACAAATCTTTACAAAAATAATAAAATAAATGGAGACAAGATTCAAAATTATGACTTTAAGATGATTACACGAGTGAAAGAAAAAAATACCAAGACAAAAATACTAGGGCTGAAGTGGGTTAAAAGTAAGGACAATTGGTTGATCTGAACCGTATATTGTTTAATAAGAATATAAATATTTTTAATTTTTAGCTTTAAAAGTAGTATATATTTTGTTTGATAACTTGTATAAACCCCGATTATACACAGACATAGCATGGGTTAGGAATTCTCAACCCGACAGGCCAAGTTTGGTACGATTTAATCTTCTTACCCATCCAACCCAACCAAGTTGCAATCCTAATTATACTTTGTTGTTAGATCCTACATGTTGGACTCAGCCTAGACTATTACAAAACTTGTTTGGCCCAAAGCAAATTTGCCAGTTGCCGGCTTGTTATTCCGATTGTGATGGGCTTTAGCCATGAGCAGCACAGCCTGTGCACCTTCCATAGTTGTCAAAAATATTAAAATTTTGTAAAAATTTCTTTCAATTATAAGGAAGTCAGTGAATGTACAATTGGCTAACTAGAATGGGTAAAATGCATTGGAGTTATGTTCCTATAAAAATTATAAACCTGAGCTGCCATCCTGGAAGAAGACAATTTTTAGTAAGAGGCTTAAGAATCTGATGATCCTTTTATAAAAGAAATTCTTCATTTATTTTTTCTTAAAAAAAATCCCCCTCTTCAATTTTAGAATAGGGTATTTGCACTCAGAGGCATTACCCTAAGATTTCCTCTGTAAGCAAATGTCGAGTATACAAGTGTTCTTCAGAGATTCATTTTTCCCAAAAGGCAAAAGAGATCTGTTTGCCTTCGATTATAGAAACGGGTGTTTGGCTCCTTCTCAAGCACAACTACGAAAATTTTGTATTGCATATAAAAACTATTCAGTCTCGCATGCTTCTTCAATATCCTGTGTTTTCCCAGAAAGATGGGAAAAAAAAAACTCTGCATGTAATTTGATTGTCCGATACCTAATGTGGTTTGAAAAACTCTGCATGCTACTAGACTTAGCATCAAACGCACCCAAATTCTTTGGCTAAAGCAATTGAATGCAATATTCCATGCTTAGTGTTGAAAAATCAAAACATGCATTGAAAAAACAGTACCTATTTGGAGGATATTGCTCTGTAAGAGTGACGTCTAGCTCCAGAAAGAAATGATTGATGTTAATTTTCTGAAGTGGCAAGTGGAACATTCAAGAGGAAATTTGAAAGGACAAACGCGTGAGATGAAAAAATTTCCTGACTGGGAAAATTATTCTAATTTGGTGCGGCTGGCATGTTGGAATTTAAACATTGAAGCAAGGGAAATCAGTATAAATGTGAGGTAGTGAATCGTACGTTGAGCACCATTCTCCAATCCCTACTCCAAC
>VvCYP82C2m  (1500 bp)
TTACCATTTTAAGAATTTATATTTAGGTTTTAAAAGAAATATTCATTTTTACCAAAAAGAAAAAATATATATATTTTATCAAAATAAAACTCCAAAAAAAAAAGAAAAATTAAAATTTTAAAATTTAATTTTTAATAATTCTTTTAATCAAATAATCCAATATTTATATATTCATCTCAGACACAATCCGAGATGAGATTAAGAGGTCTTAAACATCTTCATAAGTTATTAAACAAAAAATTTACAATGAAGTATTTTAATAAATAACTGTGTAATTAAGAAGTTGAAAAAATATAATTATTTTTCATATTTTGTATATTTTAAATAAAACAATAAATAACATAACTGAAAAACATTTTAAAATAATAATAATGTACGGTTAAATGTGAAATTTGACCCTTATGTCAATGCCAAATTTTTGGGGTCTGAATCCTTTTAATCCAGCCCAATCATAACCCAGACAAATGGATAAGGCGGGATTTTGCAAGCATGGCAATCCGGAAATCCTTGTATTTAGGGTCCAAGTCATCAACATCTTCCGCTGAATTATCACGCATTCCTCTAAAGTAGTTAAGAAATTCTTCTAATGACACCCTTCCTCAAAGAGAGGAGTTTGTCAGTTTATAAGACTTCCTTTTTTTCTTTTTTTTCTTTTTACTTTTTTTGGGTTATAGAAAATAACTGTTGATCTCCAAACCTGATGAGCCGTCTCTATTTGAACAACCATAAATCCTGAAGATTTCCTAAAATGAGTATAATTTGGAAACTAGAATGGGTAAAATACATTGGAGTTCCTATAAAAATTTTAACCTGAGCTGCCATCCTGGGAAGACAAAAGTTTCAGTAAGCGGTTTAAGAATCTGATGATCCTTTTATAAAAGAAATTCTTCATTTTTTTTAATCCCTCTTTAATTTCAGATAACGGTATTTGTACTCAAGAGGCATTACCATAACATTTCCTCTAAATCTGTTTGCCTTTGATTGTAGAAATGGGTGTCTGACCCCTTCTCAAGCACACCAACTATGAAAATTTTGTATTGTATATAAAATTATTCACTCTCGCATGCTTCTTCAATAAAAAATAGAACCTCCAGATTTGATTTTCCGATACCTAATGTGATTTGAAAAACTCTGTATGCTACTAGCTAGACATAGCATCAAACGCAGCTAAATTCTTTGACTAACGCAATTGAATGCAATATTCCATGCTTAGTGTCGAAAAATCAAAACATGCATTGAAAAAGCAGTTGGAGGAGATTGCTCTGTAAGAGTGCATGCCGTACGTCTAGTTCCAAAAATAAATTATTGATGTTAGTGGACCATTATAGAGGAAATTAGAAAGGACGAACACGTGAGAGGAAAAAATTTCCTGAACGGAAAATTATTCCAATTTGGTGGCAGCGGGCATGTTGGAGTTTGAACATTGAAGCAAGGGAAATCAGTATAAATGTCTGGTAGTGAATCCTAAGTTGAGCACCATTCCCCAATCTCTACTCCAAC
>VvCYP82C2o  (1500 bp)
CAAGATTAATAATTGAACTTAATGTAAAAAGAAGTGTAAAAACTTTAAAAGTTTAAAATATCATTTCATTATTAGTTTCCACTTGCCAACATAGATTTCTCATTCTATTCTAACAAGTTTTTTGTACTTTTATATATATATTTCATAAACTTAACAAAGGATACAAACAGCAAAAGAAAAAAAAATAATTGAGCTACTAAACCTCAATATAAATTTGGGGTGAATTGTCAAGGAGCAGGGGGAAGTACTGTATCACAGATCAATGTGAAGATGTATATATATTTATAGTATAGAACCTAAGAGGTGAACGTTTCTTTCTAAGTTAGGTAAACATTTCTGTCAAAGTTGATGAAATTTTACTATAATTTATATACACATGCTTTCAGTGTGCATATAGGTTGAAATAATATGTGGAGATGATTTTTATATGTGATTTAATATTGTTTTGGATTATTGATTATGACTATAAATTATCATGCATGGAACTAATCAAAATGATATAATTAAATTATATTAATGAATTTGAGATAGACATGGCAATTATTAATTTGAAATATCTTATATGAACATAAAATTTTAAATATAGACTCATAATTTATATTAAAATAATAAAATTAAAAAAGTACGTTTATCTCAAATTTATGCCTAGGGCCCAAATTTTGCTGAGAGCCAGCCGGATGTCATCACATGCAAGAAAGCTAGGAAACAAAGCTGAAGTTTGCTTCTTGTGTGGGAAGAGGTACTTCCGTGCTTGACTGAAAGAAAGGATTTTCTACAAGAAAAATTGTCCCCTTGTTTGTAAAGCCTCAAGTTGCGACAGCAATAACGACAAAAGTAGGCCAAAGAATTTGTCATTATTATGAGACTAGAGAGGTTTTACTGAGAAGTTTTCCGAGCGTGATATCAGCATTCGCTGTATCACAGTGATACAACAAATGGTTTGAACACAGTGATCTAGAACCCATTAGCTCAAATTTCATTGATCTGAACACGATGATCCTCATCCGCAGACCATTTTAGGGAATGATTAATTCTAGCGATTTTTTAACTGCCTGTACGAAGAACTTTATCAAAATTGGATTCAGTGTATCTTAACCAATCTTGATCAGTATGCGACTGATGATTCTATTTGATAAAAGTAATGCGGTGGCCCAACTTTATCTTAATTTCCATGTTGAAACTAACCATTATATTATTCTATAATTATAAATATATACTATGGAATTAAGATAACTTTGACATGCTAAGGATCAAAAGAGGGCAGCCACTTTAGTTGTGGATTATACTAAATAAAGCTGATCGATTATTACATTGGAAAATAACATTGAACCTATCATGAAAGACAACCCTACTGGACCATGCCCTGAGTACTAAATGCTGATAAAAAACAAGTACATGTTCCAAAGGAATTGAGTCCATATATACTCATTAGTGCTCAAAGAGAAAAACTATATATCCACCGCTTAACTACAGTGATCCTTTGAGCAGAAGAAACTAGCC
>VvCYP82C4e  (1500 bp)
ATTTGAATGGGTAATGATTCAGACTCTAAAATCATTAGGATTTAAATCATAAAGGTGAGGATATTTTATGGTATTATAAGGATGTTGAGTAATGTTAAGCATGTTCCCAAGTCGAGGAGGAGTTTAAATTTCTTTAAGGGCTTTGGACACTTTGGGTTGTGATTTTTTTGTGAAGCATAGTATTATGGGTATCAATAAAGTGCTTTGACAACTATGAAAAGGAAAAAAGTGAAAAATTTATACACCTTAATCAATAAGACAACTTATAGGTGGAGTTCTAAAGGAGTCATGTTAACAGAAAGAAGGAATGACACGTATTTATTCTTCATAATTATGTATAATTAAGAGATTTGAGTCAATGCATGTGGAGATTATTGGTATTTGAATCTAATTATTTATTTTTTATTTTTGAAAAAGTCAATATTTATAAAGTCTATGTTTTACTAAATTACCCTTTTGAATTTGACTAAGATCAGGAAACTATTGATTTAGGGTTAATTCACATGATTTTACAAATATGTGGTTTTAAATAAGATTTATACTAAAAAGGAAAAAAAAAATAAGAAAAGAGGAAAACTTAAATAGGTAAATAGTCTATTGAGTTTTGGATGGAGAAATGTTGAGAGAATTTGAAGATTTTCTTTGTGAAGCATATTAATAAATTTTATCTTCCTTTCCCAGGTCTTTTCTATTTATTTTATTTTTCCTGCTCAATTTGAGTGTTTCAATTTTTCCAGAACATGGACAGTACAAATGGCCAGATGTTTCATATACGGTGCATGTCATAAAGTCGCCGCCTTCAGCTTGGCAAGAAATCAAGCGAAACTGGACTTGAACTTGTCATTCTTAAGGAAATAAGCGCCAGCTAGGGTTCAAATTTTATGATGTGAGCATGCAACACTTATCCCAATCCACTGTTCTACTAATAGGATGTAGAAGACAACAAGCAATTGTAGGAGCTTATCTTTTTTTATTTTTATCAAGGTAGTTTCTGAAAGGATGTGGATCAACATCGATCTGTAGTGATCCCTAGAAGGCTCCACTGTTCTAATAATAGGATGTAGAAGACAGCAAGCAATTGTAAGAGCTTATCTTTTTTTCTTTTTTTTTTATCAAGGCAGTTTCTGAAAGGATGTGGATCAACATCGATCTGTAGTGATCCCTAGAAGGCTCCACTGTTCTAATAATAGGATGTAGAAGACAGCAAGCAATTGTAGGAGCTTATCTTTTTTTTTTTTTTTTTTATCAAGGCAGTTTCTGAAAAGATGTGGATCAACATCGATCTGTAGTGATCCCTAGAAAGGCTGTTTTCTAAATATAGTATTATAATAAAAATAACGTTTGCCGAAATTAATAACGTTTGGATATGTTACATGAGAGAAACAAACACGAGTACTCCTTGTAGTACATGAGAAACCATATATATATATATATATGCTTGAACGGGGGAGCTACCCACAGTTTAACCACAGTGATCCAATAACGACATTCTGAGCTACA
>VvCYP83B1  (1500 bp)
TTTTCTTTTAATTTGGAAGCGGAAACCTTATTATTCTTTGAGTTTAAAATTTTAGTCACAAAAATAATGATTAAAAAAAAAAAATCATGGTAGCATAAAATTTTACTATTTCAAATTTTAATTTTTTTTAAAAATAATTTTTAAATATATAAACTCTACATATAATTTAACTTATATCTTTAAAAATCACTTTAAAAAATTTAAAAACTCAAGATGATAAAAAAATTTTGATACTTTATTTTTTTTTTTCTAAATAGTTTTAAAAATTATTATTTTTTCATTGTATCTTTATTAATTAAAAAAAAAACAGTCTCAAATTTTTTTTCTATATTTTTTTTTAAAAATAAAATTAAAAAACAAAAGGTGTGTTAAAAGATTGTTGTTCAAATATAAGAGTTGAAATGTTTTATAGAAGTATTTTTTTCATCAATTTTTTTTTAATATTAAGATTTCGTTTAATAATGATTTTAAGAAACTCTTATAACTTTTTTAACATTTGAAATTTTTTATCTTTTAAGTATTAGAAGAGTTAGAAATGTTACATAAAATTATTATCAAACGAGTTGTAAATAGTTTCATTCTACATCTTTGTTTTTTCTCAACTACAATGATAATGACTCATAAAAAAATCCACTTGATCAACATGCACTTCTACCAAGACCCTAAGTGGGAGGGTATGATTAGTACTCAATTGCTAGGAATTTTTTAACATGTAAATTTTAACACATATAACAAATATAAATCAAGATTATAGGAAATAAAATTAGTGGAGATAAAAAAAATAAAAATAAAAAAAGATTGATTTGGATTGGTGATTCAAATCAGAATATAATGTCCTAAAATCACTATCATTTTTCTCTATCCTAAAATTTCTATCACCTCCTTATATACAAGTATTGATAATTGATGACAGTTTTAAAATATAATTCTCATTTAGATTATAACAATCCGTTTTTTTTTATGGATGTATCTGAGGATTACGAAGAACCCATTCATAATTAAATTGTTTAGAAAAATATGAAGATTTAGGACGAAGAATATAAAACACTACGAGATGTTAAAGAAGAAGAGGACGAGGTAGAAATATTTTAGTATAATTTTAAAGGTAAAGGAGTAAGAGATGATTGTTGTGGACATAATGTGTAATTATATTAAGGGTTATAAATGGTTGAAAATAAATAAACAACACGAGGAAAAGCAATCATTTCTTAACTTAGATCAATGCTTCAATCATAGAGGCAACTAGAAGGATATTTTGGACAATTCATGTGAAACCACAGAGTAACTTTAAACCTTTAAACAAATGAATTAAAGAAATGGATATAAATGTTAAATAAACAAATTTCTAAAAATAAATAAATAAATAATTCCGATGCCCAGGCTTCAAACCACCTATAAATACCCCTCCAGAGCTCTCACTTCCACCACCACCATCACTGCCCACTTCCACCGCTCCCCCCAGACTACCACCGGAATCCTACCACCTCACCAACGCCGGAA
>VvCYP84A1a  (1500 bp)
TTCTTGGGCCTGTGGTCAGTCCACATTTTAGATAGCTTTGCTGCCAAAGCTTGGGCTAACTTAACGAATGTTGGGGATGGCCTGGTCATGGCCCAAGTCATACTCCATTCGATTTGTATAGTTTATTTATATTTAATAAAATATAAAATTTTAATAATAAAAATATTCAAAGTTTTTAAAATTCAATTGTTAAAAAAATATATAAAGTAAAATCTACGATTCAAAACTTTTTGCTGCTCACACAAACAATTTTTTTTTTTTTAAAAAAAAATTTCTAACTTTTTTTAGGTGCTCATTTTTTACTTTTATTTTATTATTACTTTTTGCAAATATAATTTTTTCTTTGCATGTTTTATTTGCATTCAATTTTTTCTTGGCTATGCATATTGAAGTTCTTGTACCATTTTTTGTGCTAGAAGAATCTTTAAAGCTAGTAAATTAATTAGATATTGGAAAAATGAAAGATCTAATCAATGAAAATTTCAATGCGAACTTATTAATGAAAAAATACAAAAATAAAATAAACCATAGATATCCAAACATAAAGGTACATCGAGGTTTAATATGATTCGATTGAGTATGTCTATTTTTAATAAATGAGAGATACATTTATAGAATCATAAAATAAATACAATTATTAGATTTTAAAACATTCTATATTTCCCCTATTTTTTACTAGTCATTTCACATTCTTAGGTGTTTTCCATTCTTTTTCACACTCCAACGGTGTTTTTCCTTTTTTTTTTTTCTTATACCCCTATCCACTATGTGTGATCTTTTACAAAATCCTATATATTTTATAACATTTTTATGTTCATGTAATTTTTTTTTTCCTTTTTAGTTGAGATATTTTTTCCTTCTTTTTTTTCATTTCACATTTCTACCCTTTCTTCCATCCTATAAATATACATATTTTCCCTTAATAAACATTTTTTTCCCTTAACAAACACTTTTTCTCCTTAACAAACATTTTTTTCCACACACATTATACGCATATAATATCGATTAGCAAACAATTTTTTTTTTTAAAGGCACATATTCATTCCTGATTTTATTTTTAAATTTCTAATTTATATTATTTTTATTTATAATAAAAAAATAATTAAGTTGAAAATATTCTTTCGTGATATATGAAGTAATTTTTTTGGATTCAATTATTCAAACATATAAACTAAAATTTACTACTTCTATTAAAACTATTCTAATTCACTTTTAGAGATGAAGTCGACTAATTTTTGTTAACTTTCCAAAATTTGAATTTATTTTTCAATAAAATCTGTGCATATATAAATCTGCGTCAGAAAAGGGAAAGTATTGTAATTAACTTTAAAAAAAATCGAATCAAAGAAATAAAAGCAAATCTGTTCATACCTAATAAAAGCAAATACATCAAGAAGAAAACCGGATAGTACTATTTTCTGCTCTTCCTACATGTGAACGGACAGTCATGACTGTATAAATACTCTCAGAAATCACGCTGATTCACAACATCCAGTAGTC
>VvCYP84A1c  (1500 bp)
AATTAAATATGGTGGGTAGTAGATGGATCAGCTTTATGATCTCACGTTTGAAAGGGTTTTGTAGGGGGGCTGCTTGAAAAGTTGGGAAGCCATTGAAAAGGAAGTCCATTGCTATAACATAGAGTGACTTGACAACTTCATGTGGTATACATCTGCCACGTTACTTAATTTTTATTCCATTGGCTACGAAAATGCTACAACACTGAGAAGATTTGAAGTTATCACTTCCCGTAATGACGTCGTAGTGATGAAAAACCACGCAACGTTTTCAATGACCATAAACCTTATCTTAGATGTTAAGGATAATCATTGATTTAATCAAATTATGATTTCGATGTGGAAAAGAATTATTTTAAAAGGAAGCAACTACATATACATATATATATATAGAGGGTGAAATGAAACCGTCAATGGTTCCAATGTCTAACCAAGAAAATGACTGTTAAGGTCTGGCATCAAATCTCTCACCATCCGCTTCTTATACCCAGGTTTTACTTAGTATTTTCCCAAAGGATGGAGGAGAAAGGTGGGAGAGAAAGTGCTTATTGTGGAAAGGGTCTATGGTTTTCATTAGCTTATTTTGTACTTAAATTGATGTGAACTCATTTCTATTTTTAATGAAAAAAAATTTTACTTTCCCTGTCACGATTGCATTACCGTTTTACTAGATAATTGACTTTTTTACCATAATCAATCACTAACATTTGACCTGGGGTTGGTATTAGGCCAGAAAATTAATGTAAAAAATTAGAAATTGTTGAAAATTTGCAGTCATCTAGAAGGGACCAAAGTGAGCGACAACATACAACGAAGCCAAAAAACAAAACAATGAATGCAATAAACAGTCCACAAAATCAGCTGACCATTTGCTTGCTTTCTCATGGTTGTATTTTACAGAACCCGATTTTTTATTTTTTTTATTTTTAAATGGAAAATTTCAATGCAAGAAGGAAAAATTGACTTGTCAAGACTGAAGAGCGTCACACTTTACGTTAGGCATATTGGTTTATTACAAAGAAAGACTTTTTTTGTGTAGAAGAAAAAGCAACTTTTTTAATTTCTAACTTTAGAATTTTTTTTTAATGACGTCATAATTTTATAGAAATTAAAGAAAAAGGTTAAAATAATTTAAATTATATTTATTTTTATTTTCAGAATTTGAAGACAAGAAAAGAAAAAAGTACAAAATTATTTCTGTGTTCATCATATGTTGGAGAAAAGACAGAGATCATGGATCCTAAAGCTGAATAAATACTCGTACGTGAATGAGATAAATATACACGGCGTGTGCACAAGAGCCTACGACCAGCCCCCAGGAATTTAAAAAGGGAAATATAAATTAAAATAAAGAACAGTGTCCAGTGAGATAACGCATGGTTTGGCCGGTTGTGGAAACATGCTCACAAAAATTGTGTATAAAAGCCCGTTACATATCTACCCAAAACTAGCAACATCCTTTGAGTTGCAGAGTTGACACACACGGGGAGTGAAGGAGAAGCC
>VvCYP89A5  (1500 bp)
TCACACAAGCTTCGCACAAGCTGAAGGTGTTGTGCGAGTGTTGTGCGAGTTTCGCACAAGCTTCGCACAAGCTGAAGGTGTTGTGCGAATTTCGCACAAGCCTGGAGCAGTTGTCTTCCGAAGGCCATATCTTCCTCATTTCAGCTCCAAATTGTACACGGTTTGAAGCGTTGGATTTTTGGCTTCCTGAGATTTGAAATGGTATATAGAATGTAGAAAATGGACTTCGGAAAGTGCTCCAAAAGTGCGAAGGAAGATTGCAGCTGTTGTCCTCTATTTTCTTCACTTTGCTTGTTTTTCCTTTTTGCTTCTCTCCTTTACTTGGCTTGTTTTAATGATCCAAAAAGCTGTCAAAACACTAAAACTAGCCACAAATATGATTAGAAGTCATTGCTAGGTCCTTAACATGCCAATTGGGATAAAGATGGAGAACTACTACACAAAAGTGCTTAAAACATAATGAATTAAAGGTGTAAAATAGCACTTTTTGGGTAGTAATCAGTCAACCTGTTAATACACCAATAGAAAAATGTCTGAAATTGTGTGTTGAGCCTAATCAAGTATCAACCGATAAGNNNNNNNNNNNNNNNNNNNNNNNNNNNNNNNNNNNNNNNNNNNNNNNNNNNNNNNNNNNNNNNNNNNNNNNNNNNNNNNNNNNNNNNNNNNNNNNNNNNNGCTAAAAATGTTGATCATCAGAGTATAGAAGTATATACTGATGTCGATTGAGCCGGTGTAGTGGATGATAGGCGATCTACATCTGGTTACTTTACCTTTGTAGGTGGTAATCTTGTGACATGGAAAAGTAAGAAGCAGAATGTCGTCGCCCGTTCAAGTGCAGAAGCGGAATTTAGAGGTATGGCTCTAGGACTTTGTGAGGCATTATGGCTAAGACTCCTCTTACAGGATTTAGGTTACCTATCTAGGCAACCAATCCGATTGTTTTGTGACAATAAAGCCGCATGTGACATTGCTCATAATCCAGTACAACATGATCGTACAAAGCATGTCGAGGTGGATAGATTCTTCATTAAGGAAAAGTTGGATGATAGGATTGTGGAATTGCCTAAGATTCGATCAGAAAATCAATTGGTCGATATCCTCACCAAAGCTGTCTCAAGTCAAGTGTTCTCAAAATTTTTAGACAAGTTGGGCATGTGTTACATCTATGCACCAACTTGAGGGGGAGTGTTGAGATATTAGGAATGTTTTCCTTATATCATTCTTTCCTTATATCATTTAGTGTTGAGATATTAGGAATGTTTAGATATTAGGAAAGTTGAGATATTAGGAATATTGAGATATTATGAATATTGAGATATTAGGAATATTGAGATATTAGGAAAGTTGAGATATTAGGATATTAGTTGTTATTTCCTTATATCATTCTTTCCTTGTATCATTCTTTCCCATTCTTAGAATGGTGATTACCCTCTATATATACTATGTACATGAGCGAATGAATTAAAATTAATGAAAAAACTATCATTTATCAATTTGAAG
>VvCYP89A2b  (1500 bp)
GTGGAATTAAAAAAATTTAATCATTGATCTTCTTATAGAAAACATATTTATTTTCTTTATCTTAATTTGGCAATCCTTGAAAACGACTCAATGTGTTTATTGGTCTGCTAAAATTTTTCTCACATCAATTCTTCAACAATGACATCCTCCTGCATTCACATGGTCACACAAATACAAACAACAATGTACAAATTCTTCAACCCCACAACTTATGAGATCAAGACCTTCCTTTTTGAGAAATCATGAAATGTGAAAGAGATTCTTTGCAAATTTCAAAAGTTAATAGGATAACCAGGGCAAACCCTCCTTCCTGCACCAAAAGGCATCGTTTTGATCTCCTTACTCCCAGTCACATCGAATGCTTCAATCCCCATCTCCACACAATGATGTTGTACTAAACACATTTCTCTACATTTTTCTATCGATAAGGTCTTCCTGAGATGCTTTCATTGACACCCAAAGAGATTAGTATCAAAGTTCGGCCACCCCTGAGAATTCGTTCAGCTGGTAAACACCTTGCCTGTTATTGGGAAAGCCATGACACACCTGCTCGCTCACAAGTAAGAAGATGCGCCCAATAATTTTTTTCTTCATGCGTTTCTCCTTAACATTATTCTTTGTCTTTGAGCACATGGGAAATGTGAAAAGTGGTTAAAGGATCTTGCTCTTGAAATCTGATGTGAAAAGTTGAGCTTAATTAGATGCTTTAGATAATCTAGTTGGAAGATGTCGAATTCTAATGCTTGGAAGCATCCATTGTACTGAACCTTTTGTGGTTGGATCATCCTTGTATTTCTATGTTTAATGGCGTTTGCTCGGCTTAAGGTAGAGGACAATGGAGAGGGAAACAATCTCCCTCATGTACTGAAAATCACTATTATTGTTTATTGTGTCATTTAATTATTGAGTCGGCTGCTTTTCCTTCTTTTGTTTTGTGCCCCTTTCACCTTTCTAACATATCAAAGTGGGGGGCCCCACTTCAATTTTTTTTTTTTGAATGCAAATTCTCTCGAAATGGAAATATATATATAGTTGTTGTTTATAAGAAATTTGTTCAAATTTAGGCATAGATTCTAAGTCTTACGTGGCTAATAATAAAATATATTATATCCATGTCACATTTTGTTGTTATACAAATTTTTATTTTTAATATTTTATTTTATGAATTTTTTCTTTTTGGGTCACTTTTTACTTTAGAAATGAATGCTGAACATTTATATCACATTTCTATGACAAGTCACGGTCAAGCAATTGTCAGTCCTGTTAATTAATTTCCTAAACAAAATACAAACAAACAAAAAGGAAAAAAAAATAGAAGCTTCCGTATTTGGTCACCAACCTCCCACATGAATCGAATTCAACTTCTGTTTGCGTCATTGTAGATGTAAGTTTTTGAACTCCTCGACCGCTTCTCACCCTTTTTATTAATACCTCCTCTCCCCCATAATTCTACTCAATCCCATCATCACAACCCTCATTTCCTTTGCCAAAAATTCATCA
>VvCYP89A2c  (1500 bp)
TTAAATAATGGTTAACTATAAAAATTTTAGGGTATGTTTGGAAACTATTTTTAAGAGCAGTTTTATGTTCTTTATAATAAAAAACACAGAAAACACGTTTGAGTCAAATCAAAATTGTTTTCTATTTTTTGTTTTTAACAACATAAAATATGATGTTTTTGTTTTTAAAAGTAACTATACAAACATATAGAATGATTAAAAATAAAATATTAAATATAAAAATTATTTTTAAAATATATTCAAAAATATTAAAAACATGTTAAAAAATATTTTAGATTTTCAAACATAGTTTTGTTTTAAAAAAATCAGATATACTCAAAAACTATTTTTAAGAATTGCTTTCCAAAATAGTTATCAAAGAGGCCTCGGTGGTTCACTTCTCACTCAGGAATCACACTGCAAGTTCTTTTCTATCTATGGCCGAATTCCTTACAGCAGCGGATAGCTGCAACCACCTTTTCAAGGGAGGCATGTAATGAATTCATATGGTATGCTTATTCGTTTGCGTACACAACTTTTGGCAACTTAAAATGGACATGAATTTGATGTAATTCAAAGTGGATTTGACTACTCAATCCTTTGGGTATGGCAGGTTCCTTTACCAGAGGAACCAAACACAGAAGATGAAGCAGAAATCAGGAAATGGAAGTGGAAAGTCAGAGCTGTGAAAAAGGAAAATAGTGAGATGCATTCACAGTGGTGCGACACAGAACTTAAACTTGCTGTAAAGATGCAATTCTTTATTAATTTCATAGTGCCGTCGAAAGATGAAGGATGAAATGGCTTCTTCTATCCTCACAACCTTTATTTTTTAAGCATTATTGTTTTCCTAGTGAAGCCCAGTAGCCATCACCCAGCCCCAAGAAGTCGTGCTTTGCCCGCCGTCTATTTTGTTCGCATCTAAATTTTATAACACAATTCTCCTACTTGCAGCTACCGGAATTTGACTGCAATTTTCCTACTTGCAGTGCCGGAATTTGACCGCAACTATAAACTTACTTTCTTGTAGTGAGAAATAAATATCAGAGAAAAAGAAAGCACGAGAAATAACGAGACTTCTAACTCGCAAGATGTATATGTGACAGAATTATTAAATTCCATCCATAGAAGATATCAGGAAGCTCCCAAATTATTGAACTATCCCACCTATGAAAACCATTTTGAGAAGAAAAAGGAAGTTGATTTCAAGGATACTTGATCACTATGTCAGGTAACATATGATTCACGAACATGTTTTTTTTATTTATTATATATTCGAAGTCAGCATGGTGTGAAATGATGATTTCTATATATATATAAAATTATATTTATAATTTTCAATTAAAAAGTCAAATATTTTTTTTTTATTAAAATTTTCAAATAAAAATATTTGATATGATATCTTATTTGAAGAATTTTAATAATTTTAGCAGTATTTTATTCAATGTGGAACAAAGTCTCCCATATGGTAGCTTGCCATTATATATCTTGTTAGCAACCGAAGAAGATCTAAGGCCAACA
>VvCYP89A2d  (1500 bp)
AGGATTTATTGATAAAATTGAAAACATTACAATTTTAAATAAATTTCTAATTTTAAAATAATTTTTTTATTTAAATTTTAAATTTTAAATTAAAATTATGATTTTAATTTAAAATTCTAATTCGAAACTAATTTTATGATTTATAAATAAAATTTTAATTTTTAAATAATATATAAATTATTATTTTTATAATTATTTTAAATTTTAATAATTTATAAATTGTATATTTTGGATGTCATTAGTTCGATCGCGGTTCGACCAATAAACCATGAATTGGTAACTTTTCCGATTCAATGATCGATTCGATTTTGAAAACATTATTTGATTGTGCAACATAATAGCCTTTTTTTTGTAATCATTTCTTTTTAAATATTGGCCTTTTTAGGGGATATGATCCTCCTTTAATGGAATAAAAAATTTCACATTTACTTTTTCATCCATTACGACATTCCGAATACTCTTATGGCAACGAATTTATTAGTACGAAACATTTTCCCTTTTAATTGAAATTCGTTGTTGTCATGAAAATAAATCATTCTTATCTTAATTTATACATTTAGTTTGTTTGCTAAAGGAGGATCCATTTTTCTTTTGGGAATATGAGTTGAAGCAATATCAAAATATTTTTGATGGAACATTTTTCATAATTTCTAAGGATTGCAATTATAGCTTTGATTTTCTTCAACTCTGGAATAGAGTATAGATAGAATAAAATCCCGCCGAGGAATAAAATATAAATCATATGCCTTTAATTCCTTAAGACGGGTTTAATTGACTAGACTGGATATGTATATTATAAAATACTATTTTTGAATATTATCCCTAGAATATCATATAATTACTGATTTATGTAAGGGGCAAAAATGGAATACAAAGCATAATCCATCCAATGTACCTTTTTTTCACCTGAGAAAGATTTATCATATTTGGTATTATTTGGGGTCTCTCCATATTTTTCAAATATATATAGTTTTCTCTATTTTAGTAATATAATAATAATTAAAATATCTAAAATTCGGAAAGTAATATTACCCATATATCACCTAAATGAGTTTTTTTTAAGTATTTTATTTACATTTTTTTACCTTCCCCTTATGTTAAAACTGGAAAACCATGAATTTGTTCTATAACAAGATAATTTAATGCATTGCCTCAACCCAAATTTGAACAAAATTTTAAAAAATTTCCCTCAAAATTATACCCTTTACCATTTATAGTTTAGCCAATCCTTTTCTGTAAATGGAATAATTTAGGCAAAAAAAAAAAAAGGAAAAATAATATAGGAAATTATTTGGAATATATGGGCAAATATAAATTTATAAAGATGGAAACATACCATAAATAAAAATTTTATTTATTCTAATAAGATTTTTATGTCAATATGATCGGGAAAACCCTAATCAGATGTTTATCTAGATGGTATATATGCCATATATGTATATATATATAGCTATATATGATTTTCCGCACCTCTGCAGAAGACCATTCTGATTTTAGGAT
>VvCYP89A2e  (1500 bp)
TACACAATAAGTCATACCACACTTCATTGGTATAGATAAACAAGTCAAATTCCTTTTTATAAAAGAATAATAGGGTAGAGTTTAAAAACTAAGCCCAATCTTATTCAAACACTTTTCTTTCATTTTTATCTTTATAAAATAATTTATCCTCCTATTATTTTATTTACTAATAAAATTCACCATTTGTGAATTAAATAGTAAATAACATAGATAATATATAAATAGTATGCTTTTTTATTTTTTATTTTTATTTTAGGGTCCAACTAACTAAACCCAAATTCTTAAGAGGTCTAAATTAGCATTTTTTTTTTCATTCTTTTCATTTTATCAATAAGTAAAAAGGATTATTAAAATTCACATAATGTATCTAAAGATAAGAGATAGAATAACGATTTAAGCAAATCTTAAAAAATAAAAATTATAAATTTATGAAAATAAAAATTATAAATTCATGAAAAAAAAAATTGTATAGCAATCCAATTGTGCTAGAATATTTTTGCATGGGAAAATTAAAATGGAAAATTCATATTTCTATTCCCTATAAGAATAATTCAAATTACAAACATCATCCTACAAATTTAATACTTCTCAATCATAGATGAAAAATTGACATAGATTTTGACTAGCATAAAAAAATATTAATATCACCATTTTTATAACTTATAATTATAAATAATAATTGCATAGCTTTTTTTATGTATAATTTTAATTTTTAAAAATAATATTAATATTGTTATTTTCATAACTTATATAATTTCTAGATATGTATAATTTTGGTTTGTATAAAAATTATTAATATTATTGTTTTCATAACTTTTAGTTATAAATAATAAGTTTCTAACTATGTATAATTTTAATTTGTAACATATAGCTTGTGGCTATATAAGTTTTGACATTTATTAATTTTTAGCTATTTTTTCTTTTACATAACTTTGTACCTTATCATGAAAATGATGTAGGAGCTTTTAAAGTATTTCTCATGAAATTTCATCCAAAGATATTAAATGTAGATAATAAATCTTCTTGCTTGTTCTATTGAGTAGAAGTCTTCAAATGATGGTAGGTATTTATAACATGTTGTAAAATATATAAAAATAAATAATATAGAAAGAAGAAATTAAAATAATATTTAAGTAGTGGTCTCTCTTTTGTAGGAAGTAAATGAATACTAATTATTATTCATGGTTTTTAAAATATTATAAATTCTCATATTTTAAAATATAAATATAATTTTTATAATTTTTCATATTTTATAAAATAAATATAATTTTTAGTAAGAAGTGATTCTAAAAGTTTTTTATTTAAAATAATAAACTCTAATAGTTGTGATTGACTACTTTTTGAGAAACAATAAAAACACGTACTCCAATAAAATAAAATAAAAAAAGAAATATCACTGTCACCATCCAAGATAAGTGATTACTTCTAACCACACAACATTCCCCAGACTTCCAGATAGATAATATATAGTTATATCAGCCAGAACCAGAGAATTTTTCA
>VvCYP89A2g  (1500 bp)
CTTCATTGGTATAGATAAACAAGTCAAATTCCTTTTTATAAAAGAATAATAGGGTAGAGTTTAAAAACTAAGCCCAATCTTATTCAAACACTTTTCTTTCATTTTTATCTTTATAAAATAATTTATCCTCCTATTATTTTATTTACTAATAAAATTCACCATTTGTGAATTAAATAGTAAATAACATAGATAATATATAAATAGTATGCTTTTTTATTTTTTATTTTTATTTTAGGGTCCAACTAACTAAACCCAAATTCTTAAGAGGTCTAAATTAGCATTTTTTTTTTCATTCTTTTCATTTTATCAATAAGTAAAAAGGATTATTAAAATTCACATAATGTATCTAAAGATAAGAGATAGAATAACGATTTAAGCAAATCTTAAAAAATAAAAATTATAAATTTATGAAAATAAAAATTATAAATTCATGAAAAAAAAAATTGTATAGCAATCCAATTGTGCTAGAATATTTTTGCATGGGAAAATTAAAATGGAAAATTCATATTTCTATTCCCTATAAGAATAATTCAAATTACAAACATCATCCTACAAATTTAATACTTCTCAATCATAGATGAAAAATTGACATAGATTTTGACTAGCATAAAAAAATATTAATATCACCATTTTTATAACTTATAATTATAAATAATAATTGCATAGCTTTTTTTATGTATAATTTTAATTTTTAAAAATAATATTAATATTGTTATTTTCATAACTTATATAATTTCTAGATATGTATAATTTTGGTTTGTATAAAAATTATTAATATTATTGTTTTCATAACTTTTAGTTATAAATAATAAGTTTCTAACTATGTATAATTTTAATTTGTAACATATAGCTTGTGGCTATATAAGTTTTGACATTTATTAATTTTTAGCTATTTTTTCTTTTACATAACTTTGTACCTTATCATGAAAATGATGTAGGAGCTTTTAAAGTATTTCTCATGAAATTTCATCCAAAGATATTAAATGTAGATAATAAATCTTCTTGCTTGTTCTATTGAGTAGAAGTCTTCAAATGATGGTAGGTATTTATAACATGTTGTAAAATATATAAAAATAAATAATATAGAAAGAAGAAATTAAAATAATATTTAAGTAGTGGTCTCTCTTTTGTAGGAAGTAAATGAATACTAATTATTATTCATGGTTTTTAAAATATTATAAATTCTCATATTTTAAAATATAAATATAATTTTTATAATTTTTCATATTTTATAAAATAAATATAATTTTTAGTAAGAAGTGATTCTAAAAGTTTTTTATTTAAAATAATAAACTCTAATAGTTGTGATTGACTACTTTTTGAGAAACAATAAAAACACGTACTCCAATAAAATAAAATAAAAAAAGAAATATCACTGTCACCATCCAAGATAAGTGATTACTTCTAACCACACAACATTCCCCAGACTTCCAGATAGATAATATATAGTTATATCAGCCAGAACCAGAGAATTTTTCAATGGATTTTGATCGGCAAAAA
>VvCYP89A2h  (1500 bp)
TTTGTATATATACCTTATCATAAAACAAATTTAATTAGCAAATAATAGATATATTAGAGAATATCTTATCTATGCTCAAGCAAAAGAAATCAAACCAAAAATAGCTTAATTAGAATTAAATTCCTTTTATAAAAGGATAATGTGGTGGTGTTTCAAAACTAAACTCAATCATATTCAAACTCTTCTCTTTCATTCTTATCTCTATAAAACAATTTATCCTCTTATTATTTTATTTATTTATAAAATTCACCCTTCCAAATAAAGAGGGTCCAACTAACTAAACCCAAAATTTTAAACTATCAAATTAACATTTTCTTTTCACTCTCTTCATTTTATCAATAACCAAAAAAGATTATTAAAATTCAAATAATATCTACAAAGATAAGGGATAAAATCAAAAATTTCAGCAAATCTAAAAAAATATAAATTATAAATTCATGAAAATAAATAGATTATGTACAACAATCCAATCGTACTAGAATCTTTTTGCATTGAGAAATTCAAATGCAAAATTCATACTTCTATTCACAATAATAATAATTCAAATTACAAACATCATCCAATAGGTTTAATACTTCTCAATCATGGATTAGAAATTGACATAGATTTTGGCTAGCATAAAAAAAATATTAATATTATTATTTTTATAACTTATAATTATGAATAATAATTACATGGCTTCTTGCTATGTATAATTTAAATTTGTACCAAAAAAAAATATTAATATTGCTATTTTCATAACTTTTAATTACATGTAGTAATTATATAACTTCTAGATGTGTATTACTTTGGTTTGTACAAAAATTATTAATATTATTATTTTAATAACTTTTGTTTATGTATAAAAAGTTTCTGAGTACATATAATTTTAATTCATAACATATATCTTCTAATCATATAAGTTTTGACATTTATTAAATTTACTAGCTATTTTTACTTTTGCGTAACTTTAGACACAAAATTCTCACACAAGTTTATCTATGAATAATGAAAATTTGAATTATATTCTAATAATATAAAAAAAAATTGAAAATTATAACTATTATAGAAAATAAAATCATATGATTTACCTTATCATGAAATTGATGTAGGAGCTTTTAAAGTATTTCTCATGAAATTTCATCGAAAAATATTTAATATAGATAATAAATCTCCTGCCCAATTTTGTTAAGTAGTAATCTTCAAATATTGGCTGGTATTGATAATATGTTGTAAAAGGTCTCCCATTTAAGGAGAGTAAATCAATATTAATTTCTCCCATTTTTTAGGGAGTAAATCAATATTATGATTATGCATCATTTTCATAATAGTATAAATTCTTATATTTTATAACATAAATATAATTTCTATAAATTTTTCTCATGTTTTGAGTAAAAAGTATTTTTTTTTAAAAATCATTTAAAAAGATAAAGTCTAATCATAGTGAATGACCAATAAAAATAAAAGGAAAAAGGAAGATAAGTATCTTGGCTAACACACACAGGACCAGAGACTTTTTCA
>VvCYP89A2i  (1500 bp)
TTTATAAATAAATAAAAAAATAAAGAAGTAGACGGCTTTAGAAGACCACTACTACTTCATCATCACCATAATTCTTATGATATTTCAGTATAATGTATGGATTTGAACTGCACATTCTATAACATATATGCAGAATATTAAAGGGAAAGTTGGCTCGATGTGTATGCAAAATCGTAAGAAAGTGGGTTATCTTTCCTTGTGTCTAGCTACCTCTTGGTTGGTCTTCTTTGATGGGAATTTTATCGCAAGAGAACAAAAGGAATCCTCCTTTCCATGAGTCATACAACAAATGACTTTTTGATGGGGCCGGGAGGTTATAGCTAATGAAGAAACAATCAAACTCAAATCATATATATTCATTATTTTTTTCATCTAGGATGAGGTTGTCTAAATCCCACCTTCTTGGGAGAGACGAGCCATGAAAAAGCAAGAAAGTGCAATCAATACTAAGCCCTATGCCTAGATTTCTTGACCAGTAACTCTAATATGCATATAAAAATTTCCATTCGATGTGTAGTTTCTTCTGTTTTTATGTTCAACGATAATTACCTACTTTCTTCTATCCCTGTCATTAAAGCATCAAGAAGCACAATATTGGCATTGGGTTAGAACGAGATACAATTTATCTGTCATCTAAGTGGAAAGGTGAGAAGTATTATTTGGTCAGCTTAGCCCGAACCTAGTCCGAATCCAACTTCACCTTTGGTCAGATTTTGATTTGGATCAAGTTTTTTCAATCTTTTAACTCAATTTGAATTGGTTGCAAACAAGGTTCATGCTTTGATCATATTTATAATTTATATTTTCTCACGTATTAATATTAATTTTATTTTATATATTATTTAAATTTCCATTTAAATCACACAACATGAAGCTAATCTAATCTAACCATCCAAACCTAGTATGATGGGATTTGATTAGGTTTGAAATTAATTATTTTGAAGTATACCCCAGATCAGATCAAAGGTCTGATTGGGTTCCAAATTAATTATTTTTAAATTCTGACTTGGATTGGGATAACCCTCAATCGATTTGCCAACCCAGCAAATTATCCATCTACGGTGTCAATTGCAATAACCAATCAACGTGAGCAATACAGGATATTTAGGATAACTACAAAAGGCCAAAACCAACTTAGGATACTGACAAACTACAGTCTAAATAACATGAAATTGATATATATATATAAAGAAGAAAAGCTACGAAAAAACCACGTCATCTTCCATGAAATTGACTCCTGACCACCCAATATGTCTAATGCAGATAGCAGCATTAGCACAATCCAGAAGCATATCTTTCTTCTTCTCCATCCTGATTGATTGGATTGGATTTCATAACGAAA
>VvCYP93D1b  (1500 bp)
ATTGAAAAAAAAAACCCTTAAAAAATAGTAAATCGTTTATTAAAATTATGTCTTCAAAATACAACTTTACAATGATATTGAAATTGTATTTTAAAAACATAATTTTAAGACAAGTTACTATATGGCACTTTCAACAAAACTCATGTGATTTAAAGTGCCATAATTTTGTCAATAATTTTAAAACTATCATTTTTCACAAATAATTCTACTTACTTTCCATAAATTTATCTAAAATCCCATTATTGAAAGCCTATCATGCTGCATTAGCTTGGGTCATTCAACTCTAGGTGATGTCGAGGGAGTAGGAAACTAGTAGGATTACACTTATGGCCCTCCATAATTGCGAGGTGACATGGATCATGACGATAGTAGGACACAGCCACAAATATTAGTGCCTTTGTTTATAAGGCTTTCGAGCCATTTGGTGGAACGTCACAGCACATCTTCTTATTTATTAGTATTGTCCTCCTCATTTCTACCCTAGATTAGGATGGCCGCCTAGAATATGTAGTACATTAGTAACTAGGCACCAAAAGCTATTATTAGTTTCAAATTAATGATTAAATACACCTATTTAACATCTTTTTATTCCAATTTTTATATATAAAAATAAATAAAATAAATGAAATGTACTATCTCCATATAAATAAGTATATGAATTAATTGGTTAAAATGAACCGAATGATCCCTTAATATGTGAATCTAACATTTTTTATGTTTTTACTTGAAAAATAACTCATTCTTGACATAAACTGTCTTTTACAATTTCACCAAAATCTTGAACCTTGCTACAACCTATTTGGATACTATTACAAAGTTTTTACAAGTTATTCTTTTTAAGACAAAATTAAAATATTTTTAGATGGTTTTTTCAAATGTTTTGAAAAATAACTGAAAATGTAAAATTATTTTATGCATTTTTACATTATAATAATGTAAAACACTTATGAAAAATAAATCAAAAAACTATTTTTTGTAGTTAGATTTTCAAATAGAATTTAATTTCTTAAAACAATTGAGAGTAATTTTTAAGAAATGTGCTCAAAACCTATTTTTTTAGAATTATTTTTAAAAACTTTCTCAAAAAGACTTGAATTTAATGTTATATTAAAATTGTCCACTAATAAAAATTTAATGTAATTAACTCAAATTTGGAAGCAAACTGTTTTTTTTTTTCCCTATGAAAATTCATTACGATATTTTTGAAGAATATAACTATTTCTTAGTTAATATTCTATGCCATCAAAATCCTGCAACCCTGAACCAATTTTTAAACTTTCCCCACATCTCCCTTTTTCTCTCTCTCTCTCTCTCTCTTGCTTATCACCTGCTATAGGGTCATTGTTTCTATCATGTATTAGGATACTTTAATCTTGGTGGCAAAAAATGGCACAAGGTCCATTAGTCCATATGAGACCCAACAAAAAGGGGGTAATAATATTGAGTGGTTTTCTTCTATATAAGAGACCAACACCCTGGTTTCATTTTGCAGCTTAAACC
>VvCYP93D1c  (1500 bp)
TCCGGATGGGGTGATCTGGATGGTCTGCGTGCTACGTGTCAATATGAGGTGTGTGGTACGTGTTCTCAGGAGGAGGGGTCCCTACAATTCCGACCGGTCTGAAGCGAGGTGATCACGTACCTGTTCGGGATCTCTCTCTAATTTTTTTTTTCCTCTCTTTTTTGTAGTTTGTACAAGTGTTTTTGTTAGGTTTTAGAAGTTATGGGTATATTCAATCTTTAGGGGCCGTTTGGATCTCCGAGGAAAGTGTACGCACATCCAAAAGTGATTTTTAATTTTTTAGCTTCTTTGTATTTATTTTTTTTCCATTTCCGTTTCTTTTGGTGATCCGAACTGAATCCCGGAGCAACGGATGAAAAAAACCAGTAAAAACTCTCTCTCTTTTTCCAAAAAAAAAAAATACAAAAGATAAGGAATAATTTAAAGTACATAGTAATTAAAATAAATTTCATTTTATTATTTAGAACTTAGAAACGATAGATAATAAAAAGGAAATTTTCTTATGATTTTTAAGTTGAATTTATTATGATAGTTAGAATTTTTCAAAATCCTGTACGATATGGGCTCAAGCCCCATGTCAACCCAAAATTTAAGGCTTAAGTCCAACCCAACTTGTAGCCCAATTGGACCCATTGCCTTTGATCTCGAAACAATCCCTCATTTAATTTACAGATGAAAATAAAAAATAACACTAATGATTTTTATTTTTTGATTTTTTGAAAAAATTATACTGTACCTTTTCAAAATTCTTCATTCTCTACATAAGAAAAGAAAGACAGAAAATTAAAAAGCATGAATGAAAGCATTATTAAATTTAAACCACTTTTTTATTCTCTATCTTACACAAATTAGATTTATGCAACCCATCACCAAAACATTTTATATCATGTCAAGTTGAGCTGAGATTGGCCCTTACGTGTCTTGGATGACTCCAAAAGCTCAAAATAGGACCACAAACCAGGCCCAACCAACAGAGAGTTGGGCTTCAAGGCCCAACTTCATGCTGACCCAATCTAATGGCATACCACCAACCTGCCCCATTATCACACAAATGGATTGGGATTGAAAATATAAATAACATTTGCCAAATAAACATTGTTGTTATCACAAAACTGTGGAAATCAAGCTTGAGACACTTTGAACTTATACTCTATTTTGTAGCTAAATAGTAACAAAAGACTCATTCTAGATTTATTTAGCTCCAAGATACTTTGCTTTTGTGTGACTCCTTGTAAGCAATGTTTAAGATAGAAAATATTATTTTTGTACTGAGAGACAAAAGCTACGACTAAAAGTCTAAAACAAAGACGTTTTCATTAGTTTTATAATGATTTGTAGATGCAAACAAGGACTTAAGATGATATTGTTTTTCTTTTATTTTGATAGTGGATCTGTTTCTTCGACCCCATATCGAGAATTAAAGATCCTAAATCAGGCCAGAAGTTATTGACAGATTACGAGTAAAAAAAGATAGGAAGAAGAGTGCAGAGTTTGCAAACC
>VvCYP93D1d  (1500 bp)
TTTCCTTTCGTGATCAAAAAGTGAATCCCCAAGCCACAGATATAAGAGGAATAAAAAAATAAAAAATAAAAAACACATGAAATATAACTTTCTTTTTTTACATAAATACCAATTCTTTAATTCCCACCGCAGAGAGCAATTTTCAATACATAAAATTTATTTATGGGTAGAGATGACCTTGGGCGATAAAATATTTGATCAAAAGATGAGATAATACCTATATTTGAAAAAAATAACTTTTATATATTGAAAATTCCATATATATATATATATATATATATGCTCTTTTAACTTTTTTTTGCCTTTAAACTTTTTATCAAAAAAATATTGGATGTAAGATAGGGTTAAAAATAAAAATATTACTTTTTCTGGAAAAAATAGTCTTTTATTTTAAAAGGGACATGTATATAATCTAAATATATTTAAAGACATTGATATAAAATATGGATTTTAGATTACAAATTTGGGAAATTAATTCATTAAACCATCCTTTATTTAATTTATCAATTTTTTTGGAAGAAATTATATGATTTCAAAATTCTTCATTCTTCATATAAGAAAAGAAAAAAATAAATTTAAAATGCATCTAAATATTTACAAACATTTATATAAAATATGGATTTTAGATTTATAAATTTGGGAATTATTTTATACTATTAATTCATTAAACAATCCCTTATTTAATTTATCATTTTTTTTTTGAAGAAATTATATGATTTCAAAATTCTTCATTCTTCATATAAGAAAAGAAAGAAATAAATTTAAAAAGCATCTAAGAGAAATTTATTTAATTTAAACCTCTCTTTTATTCTTTCTCTTTATCGCTATAAGTTACATTTATGCAACTCATCAACTTGGTTATCTTTGATTCTTAAAAAAATTAAGGGAAAATACAAAGAAAAGAAATATATTTAAAGTAAATAAATTATTTTATATGCTAATTAATACTCATATTAATTGTTTTAATTCTTCATTAAATACTTTGGAAATGAATAATTTTCTAATTAATTTTAATTATATTTAACTTTTTTATAGGATAATCAAACATTATAAAATCATTTTCTTAGTTTTTTTTTTTTTTTTTTTTTTGTGTATGTCCCGACATCCAAACATAAACTTTATATTATATCATCTCAAATTAGGCTGAGATTGGGCCTTACTAGTCTTGAATAACGATCTCAATAGCTCAAACGGCCCACCCACCATATAATTGGGCCGGAAGGCCCAACTTCATGCTGACCGAGTCTAGAATTAAATTGACCCAAAAATAAAATAAAAAGCAAATGGCCCAAATAAACATCGTCATCACAAAACTATGGAAATCAATGGAAAAACATTTTGTATATCTGTGGTTATAATGCTGTATAATTTATTTATTTTATTTTATTTTGATATTGGGTTTATGTTTTTCTGACCTTTATTTAGATTTAGAGACCCTAAGCAGGCAAGAAGCTATTGACAGATCAAATAGAAAGAGAAAAAGTGTAGAGTTTGTATACC
>VvCYP98A3  (1500 bp)
AGAAGACCATAGCCCACAAGGGTTTTGTACCACAAAAAGGAACTACAGCATAGGATTGACCCCAATTCTAAAATGCACTTCACTGTTCAATATCTTATACGCACTTATTAATTTTGAAAGATGAAAAAAAGATCAGAATTCGTGGCACAAGAGAAGTTGGGCGTGTAGATAACCCCTGTAACAACAATGTTAGGGCATTGATTTAGTCAGCTTGTCGTCACACAAGAGAATGGTGAGGTTGGTAATCTAGGCTAAGCGGCCCTGGCCCAATGATCCCCCCACGAAACCCATTTATCAAGTCTTACCAACCCCCACCCAACATCAAGGGCCCCACTGTACATATATCGTCTTCGACTCTCCACCACACCTACTACCTACCCACCACCACCACCCGCTTCACTCAATCCTCCTCCAACACCACACCACCACCGCCCAATTCCCAATCCTCCACCTCATTTTCAATACAAATATAATTTTAGTTTAAAAAAAAATATATAAAAAATCTGTCCATTTAATTGTGTTATTATCCCTGAAAGGGGTTTCAAAAAAAAAAAGGTGAATTTTAAAATGAACTAAATAATGATTGGAGGGCAAGCAAACAAGTTGGTATATTATGGTGAGAGTCTAACAACCCCTTCTTCTATCCAGTGGATCCAAACAGGAAAGAAAAAAAAGGGTGAGAGAAAGGAGTCGGTCTAGAAAAAAGGGCAAAAAAAAAATCCATTTTCACTGTTTTGAGTGGTGGAGTGACTCTCATGTTTCTTGAAAACTGCATCCCCTTGCCGCTTTGTTAAAAAAATGATTTCCTCTTTTTTTAATGAAGAAAAAAAATTACATCATGCCCATGGGGCTATACATACACATAGCACTGGTACTATATTTTCCCATGGCAGGCTTTATTAAGGCTGAAATTTCAACAATTTTTTTGTACGATCTACCTTTGTCTGTAAATTATTTTGTCGCTGCTGGTTGGTAAAGGTTATTTTGGTAGATTCACACTGGCTAGTTCCAATTTGAAGCGACCCACCTCTCCAAGGGTACTAGACTTTTCTGGAATTTTGCTATGTGATAAATAGTTAAGACAATAATTCAATTGTTTGAACTATTTTTTTTATAATTAATCATAAAAATACAGTCTTATATAAGAGTAAAGATAGTTACGTATATAGTGAAAGGAAAAAGTACATCAAATTGGGCATGGGTTCATAATTATGAGCCTATATTATGGCAATAAATTGGTAATAATAAAAATTAAAGCTGTCCGGGAAAACTTAGAAAAAAAAAAGTTGTCTCGACTCACCTCACCAACCCCCAAACCCTCCCATCTCCTCCCACGCGCCACCACTCTATGACTGGCGCTGGCCCCACCATGTCTCATGCTAGATCACGTAGAAGGGTCCATCCACCAACTCCCTCATCAGTACTCTATATCAACCTCCCTCCGACCCTCTGTTTTGTAGAAAAGTTACCCACTTACCACTCCCTCCACCCCTCCCTCCA
>VvCYP706A3a  (1500 bp)
TGCTGCCTTTCGTCTTTGTTGTTATCATCATTGTTGCTGCCATCGGTTTTTTCTATTCTTTCTTTCATTATCGAGATGTCTAATCATTTGAGCACCACGGCGCTTTTGTATTTTCTTATATCTTCATTCGCATCACCATAGAAAACATCATCATCTCACTCTTCAAATATTCACAAGCTGGACACCGTCAAGATCATGACAGCCCCTTAGTCTATAACGACTCCCTCTAATGGCGGATGAATCTATTTTCCACATTCTCCAACCGTTGTCTTGAGAGCTCATCCTAGAAATGAGCTAGATACAAAATTAAATAATTGAGATTCATGATCGAAATTGAGTTTTGCCCGCATGAACCAATTATAAAAGTCAAAGCCCATGGATATGCCTCTCATTTCACCCAGACAGCAAATCTCAAGACCGAATCTTCGCTGGTAGATCTTCATCGCAAGTGAGGACAAACACACTCCCTATCTTCTAACTCTGGGTACCAAAGTAAAAAAGACTTCTAACAAGTTCACCAAAATTTCTAAATATAAAAATTTGAAAAATCTAAGTATTGAAATGGGTGTCTAACAATCTATAAAATATATAATAAATGAGGATGCAAATGATATAATCTAATGAACTTAAATTATAAATAAATGAGATTAAAGAATAAAATAATAAATTTAAAATCTCATCAACTACCCTTATTTCATTAAATTTAACGAGGTGTCAATAAAAATCATAAATAAGAAGGGGTATTTAAATGTATTTAGCTCAAAATGTAGGGACGATAAATAAAATTAACCCTAATTCAAAACTCTTTTGTTTAATTAACAAACTCATGAGTGATTTATATGCGTGATTTTTATTTTTACAATAGGAGTAATACATGTGTCATTATGCATAGACAAAGGATTTATTAATTTTAAAATGTTTTGTTTGGATTGTGTTTGATTCTTTTACGAGTATATTAATTTTAAAAAATAATTCGGAATTAAAAAAGTAAGTCAAGTAATTCCAAAATTTCTTAAAGTAAAATTGGTTTAGAGGATTAACTAACATGATAATTGTTGAATAACTTTGTTTTTAGAAATTCTAGCATTAATTAACTTATGTTTTTATATTTTAAAATTAATAAAATCATTAAAAAATTCAACACATTAAATTTTATTTTACTAAAATTCGTTTATTAAATAATTTATTTTTAAAATTTAAACTAACATGCTCATTCTAGACTGATTTATTTGCCAAAAGACATTATGTTTTTAAACTCAAATTTCAATTTTCTCAAATTTCATTCATAAAATTGTACATTAATGGGGCCTACATTTAGGTATTTCGGCCCAACAACCCAAGTTAAGAAATGTCCCCGTTCCTACCGGTACTATATGACAAATTGGATTCGCCGGCGAGCTATAAATGGAGGCTAGCGTTGGCAATTAGTAACCACTGCCGCAGGATAGCACTGTATCACTGCCATCTTAAAGATATCCACGTGCCCAATACTCATACACC
>VvCYP706A3b  (1500 bp)
GAGAATCATATTACTGAAGATTGAATCAGATGCAACTATTAGGTTCCCGAAACATCTCATATTTCCCTACTCCTATCTGTATCCTACTATAAGCTCCCTCGCTAGCTCCATCAGGTATCTTCCGTTCTCTCACATTTTTACTGAAGATTGACTTTTTCCCCTCATAACCTAGAACATTTATAAAGAAATTCCTAATAACTTTTCTTATTTAATAAGGAAATCTAATATTACTATATCGAAATATTCTATATAATATTCTTTACAAAAAATGAATATACACTAATTAGGAATTTGGGATACTATCCAACAACAATTTTTTATCACGCAATGCATTATGGACATAAGTATAATTTTATGCGATATCACCTTTGTTTTATAAGCAATTCTCGTTTAGGTGAACAATGTCATATATTAGTATATTACCATTTGGCTGGCACGGTTTCACAATAAACCGGGGATAGAATAAATGTGATAAAACACATGGACAGATAGACAGACAAGCATTACCTAAACCCAACTATTCGGGATAGACAGATAAGCATTACCTAAACCCAAATATTCGGGAGATTAAATAAATAAGATCTTGATTTTCATCGAGATTCCACAAAAGCTGTCTGCTCATAAAGGATTGTTTGTTGGCGTCAACAAGCCCAATCAAGCTAAGCTCTTATTAATTAATCCTAATATTTGTAAGAACAAACTAGTTGAGTATACTTAACTTCAGTCCACCCACAGCATGCTCCACGCTTCTATATTCAATTATTCATCGCCGTCCAAGCAATTAATCACAGAGAAGAATAATCCGACTTCCATATTATATGGTGCCTCTATTTCACATCTCTTGTTAAATCTTTAGTTTCAAGTCATTCGCTCATAAGCTTAGCAGGTGTTTGTAAACTAACTTAATAAATTAAAGTAATTTAATAACTTAATTCAAGTTATTAAATAAGTAAAGTATATTTAGTGAAATAACTTAATAATCTAACTTAAAGTCCAAAACAACTTTAAGTAATAAATAAAAATAATTAACTTATTCTTAAATCTATGTTTTAGTTTTACATTTTTATCCTTATTTACCTTAATTACCTTAACGATCTCTTTTACTATTACACGACTTTCATTGTTAATCGATCTCTTTTGTCCTAATTTTAATTTATATAGATAAATATGTCAATTTGATGATTTAAAATAAATTTTATCAAACAACTTTAATACTTAAAAGTAAAAAATAAATAATAAATTTTAAATTAATAACTTAAACATAATTCAACTTTAAATCAATATTTTAAATCATTAAATAATAAGTATTAAGTTTGAAGAAATAACCTCCTTTTTTATTTATTTGTATCGATTCTCGTAACTACGCGAGTTGCTTGTGTTTATATAATAATTGTCCTTGTTAGGCCATCAACTTACAAGAATCGCAAAAGGAATAATCCAAGCTCGATGATATATAGAGCCTCTATTTTACTTCTTCCCAAGCTCTATTCTTCAGCAAAC
>VvCYP706A3d  (1500 bp)
TAAAATTAAATCCTAATATTTAAATCCCTATAAATATTAAATACCCTCAATTTTTTTTTATTCTCTCAACTCTTAAACTCTCTCCCATTCCACAATATTTCTGATTATTGCATTTTGTCTCAAATTATTCAATATTATTGGTGGTGAAAAACAAGCATTGGTGGTTCAAAGAGTTCAAATTTGAAGGAATTTCTGCTTCGGTTCTCCAATTTAGTAACATACTTCACCTTTTCTTTTATTTATTTGTTACATTTTAATTTTACATTTATTATTTTTAACATAATATTTTATCAATAATTATAATTATGGCAAGTGGTTCTTGTTCTTCATCTAATGCATGTGATAGCAAAAAATTTACTTCAAATATATGGAATTTTTTTTATAGAATAGAAATAAATTTAGAAAATAATAAAAAAGAAATAAAAGCAAAATGTAAAATTTGTAACAAACTTCTTAGTGGTGGCTCAAATGCAGGTACAAGTCATTTAAAAAGGCATCATGAAAATTGTAAAACTAAAAATAATATAGATATTAGAAATTATATGCAATTAGATAAAGATGAAAGTGGAAATTTAAAAACATTTTCTTATGATGAATCTTATTGTCGTGAAGAAATGATTGGTTATATAATAAGAGTAGAACAACCTTTCAATTTCACTAGTTCGCTATCACCTCCAAGAGATAATGATTAAAATATTTTACTAAATGTATGTCATATTTTTATTTTTATTTTTATGGTTGAAAAGTACAAATGATTGACAAATAAGTAGGTGTCAACCTAGTTGGGATGTATTTATTTTGTAGTAATGTAAACTTTTCCCACATTTTTAAATGTAATGTATATATTCAATAAATAAAATAGTAAACAATGAATATTTTTATTAATGTAACATTTTCTATTTCTTGAATATTTTTTTTAATATATATATATATTTTTTAAAGTGGCGGGCCTACGGGCCGACCCGCTGGGTCGGGCCGGACCTAATTTGGGGCCAGTGGCCCGGCCCATCCAAAAATGGGCTCGGGCCTGTCGGGCTTGGGCCGGGCCGCGGGCCACGGGCTTTTTGGAGACCCTTTGTTCAAATATAAAAACAAAATTAGAAGTGTTTACCAAGTCATGGGAGGTATGGTTGTTCGCCAACTTTGAAAGAAAAAAAGTAAATTTTTTTTCATATAAAAAATAATGATAAATTAATATCAATTATTGAAGGCATCTGATTAAATTAATATCTTTTTACCTGCGCGAATCTCAATCATATCAGCGCATCACGTGCAAGGCGTACAATTCGAAACAAATTAATTTTAAAAATGTTCAAAGGGAGGTTTCTTGACAAATAAGACGGTATCATTTTGATGAAAAAAAGAAAAAAGAAAATTGCAGATACCAAATCCACTTAATTATCATTTGGATTTAAATCCTTCCCTTTTTCTCTTTTGCCAAACACTTTTTTAGAATCACTCACAGTATTGCGGTATCGAGGCATTATTTTCGTCAATACC
>VvCYP709B3  (1500 bp)
AGTTTATATTTTGTTATAATGTTATTGGATACTAAAGGACAGTTGACTCTCTACAATAAGTTTATATTTTCTTTAGGTCTCAATGATCCTTACTCGAGTTCATATTTCTTGGTAACACTTTTATTCAAAATTTTGGGTTCCTTATTCATATGTATGCATAAAGATATTTTGGTAAAAATATAAGGTTGCATAAAAACTTATGGATGATCTTGTCAAATCGAGCTAATTAATTAATTAATTAAAACCCATATGGACTAAATTAAATGATCCAAATTCAAGATAAACTCAAATCACTTAAAGCTCATAAGTGAAGATATATATATAACTTCTTTCATAAATCAAGTTGCAAAATTGAGTTGTATTATTTTTCATTACGCAACTAGCCATGATAAAGATCTGAGTAATGAGGAGAGACTAAAGGACACATACAAAGTGTGATTGCTTCGATGGCAAAACTTATAAATATGAATTGCTTTGATGGCCAAAAAGTGATGACAACCAATGAAATTGTCAAAATCAAATTGGTGGATTGACCCACAAATATCACAAAGCTTCCTAGTGCAATAAATTGCAAGCTTCTGGTTTATAAGGGACCATCTTTTTCTCCAATTCCAAGGTGGCGTGGCCATGATCGCGGCTTTTATAGCGTGGTCTATTATAAAAGCTGGAATGGTGTGACATTGATGTGCAAGTGTAAGATTTTCCCTGGACAAGTATTTGGAGTAAAGTGTTATCGGTATACTCCTGTCATACATCCAATAAGAAAGAAAATTTAATAAAACTTTGTATGTAGACTTTATTGAGTGATGGATGGAGATGTAAGGAAGAGTGACTCATCCAAGGGAATGGATAGAGATGTAAGGAAGAGTGACTCATCCAAGGGAACATGATATGAATGCAAAGAGTGGTGAAACTTGAAACGTTTTTATCGTTTATTATATTCTTTACGGGATAATGAATGATTGATCATCTTAAAATCTAACTGTAATCCACTGTACTTGTGAATGATTTGATTTTTTATTTGTAGCTTAATACATTAGAATTGAATCTTTCCTTTGCCTAACGAATAGAATTATAACATTTTTCAGTAGTCTAATGTTTCAAGGAAAAGGTGGGACAGAAGATTCTGTAGTGCATGCACAAGGTCACAATATATCCATAACACAGATGTGTGGTTAGAGCTGAGTAGAGCATGCAATTGAATGTCCTGTAATCAGTCCAGATCTGGCACTCTTTACTGCAAGAGCCCACCAGTAGTTAAATGATTGTGATAGCAAGAGGATCTGAAGAAGACAGGAGCTTCATCCATGCCTAAATTTACTCTTTTTTTGAATGATAAGTGTGCTGTCTCCGGCCCCATCAGCTACATCAGCACTGACCTCATTGTCTAAGTGCCCCTCCCTACGTGGAAGCATTCACTGCTCGATCACCCAATATTTATATGACCCATTCATGGCAGCATGATTTTGCACTGTCTTCTCTCGGTCTCTAACTCTCTGC
>VvCYP714A1a  (1500 bp)
GACAAATAAAAGGTCAACAATTATAATCAATTGACTAGAGTCATAAGGTTAATTATTAGAACGCGTTGACTTAAGTCATATAACATCAACTATTATAACCCATTGACTAGGGCCGAAAATGTCAACAATTATAACCCATTGACTATGACAAAACATGTCAACAATTATAATATGCTAATTAAGGTTATATAAACCAAAGTCAAATACTTTATTTCATTAATTCGAACTTACAAAACAAAACATCATATCTCCACAAATTTTTTTTTTTTCATAATCAAAGAAAATGCTTAAACATATTTTTCATATGAAACATATCTTAATCCATGCATAGAAATAAAATAATATTTTCACACGTTTCAAAATACAATATAAAAGGAAAATTATTTCTTTTTGCAAAATCTGTATTAATTTCTCTTATCTTGAAAAAACACTCTTGAAGAATTTTACTTGAAAATTTTGCTTCTCACCTAACATAATATCATATACAATTATTATTATTGATTATTTATCTAAATGTATAAATTTGACAATTCTAAAAATATTTTATTTAGTATTAGGGATCCTAATTAATTTCTCATATTAATATTATTACCACATAATATTATTTTCAACTTCCTAAACAATATCCAAATTTTCATAAACTCACATCCGTTCCAAATCTTATTATAATAATCTATTTGTTTTATATACTTAAATTATATTATTATTATTATTATTATTACACAATATTATTATTATTATTATTATTATTATTATTACCCAATATCCCCTTACATAACAAAATACTTACTACTTTTAATAACTCCACCAATTCCACCAACTAAATTCATTATCATTATTTAATTTATTCCACTCTCTACCTTATACAAACTATCTCCCTCCTCCCTCTCACAGCCACACAATTGATATCCCCCTTTTTTTTTAAGTCAACAATCTCACAATGTCTTCGTTTTTCTTTTTCTTTTTCTTTTTCCCTCCAATTGATTTCCTTTTTTTTCTTTTCAATCAATTCAATCAACAATCTCAAAATTTTCTTTGAAAATTTCCTATCTTTGGTAATGAATCAATCTATATTCACAAATTTTCAAACTTTTTTATCTAAAAGTTAAATAAACAAATCTTAATTTAAATTGGAATTTTTCAAAGAATATTTAATATGTTCAAAACTAATTAATGAATCTAAAATATTAATATAGGAGTTAGAATCTTAGTTAGAAAATCGATCTTCAACCCAAACTTCCAAATCTTCCTTTCTAGACAAGAAATATCTAATTTATAGTTTTATAACTAAGGATTTTAAACACGAAAAAAATCTTATTATCTTTATTAAATTAAATTAATTTTTTAAAAAAATTACAATTTTAGCCCCTAAATTCGGTTTGGGGGCGTGACACAAAAAGTCTCGCAGTATCCCTATATAAATGGCCTCATACTGAATGAAGAAGACAACCCAAGACCCCCAAGGAAGCAGTAGAGCGAAGGAGAGTTAGGGTTTCGGAA
>VvCYP714A1b  (1500 bp)
ACAATAAGATCTAATTGTATACGTAACACTATGTGAAGCTTTTTGATAGGGGTATAACATGATGGGATTGGGTGTAATAAAAACAATAGGATGCTGATTGCACACATTAACTCTGTATGAAGCGTTTTGATAGGTATCAAATTAATATAAAATAATGGGATGGGGTATATATATAAAAACAACAAGAGGTTGATTGCGGAAGTTTAACACCATGAGAAGCTTTTTGATAGGGGTATCAAATCGATATGAATACCATGGTAAGTAGTAACCGTTACCATGACTCCATGAGCCAATCTAGGATTAACCTGAAAGGATTCCAGTGTCAAAACCTCTGACACCTACAGGGGCTGAGCCATGAGCGGCTCCACGGGCGGAGTCCTGTCGAGTGCGAAGGACGGCGTCCAACTCTTGAGTGGGGCCTTGGCACTTGGCTAAGTTGTTAAGGTTTGTCACTCCATCCGGCATCTGTTGCTGAATCCAGATGGGTCATGTGACAACCTGACAGTTCAAAGCCAGCAATGTGATCATTCAAAATCCAGTGGTCCTAAACCCCATCCAACCTACACGCTGAAAATCACGTCTGGTGGCCCACCCCCCACCCCCCACTCTCATTTCATCCAATGCCCTCATACCACGCCCCCAACATTACCTTGAGGTCTGTTCCCAAAACTCCCTGACACCATCTAACTACTTTGACCCGATTTGTCGGTACTGCGTTATCCCATGTGATACCTTCCCATCCTAAATTATTTCTAAAACATAGTTCATTGGCATGCCCTTGTTGAGCTACACTCTGATTCAACCAAATCATATGTTGAGTTTGTCTTTTTGATGTAAAAAGAATAAAAATAAAAAAAACATTTTTTAGAATTTATTTGGATGTAATTAATAACACGATTCTTAAAATAAACTTGCGGCTGTTATAAAAAGGTTTATCCTATTTTCGTTAGGATGTATATTTTGAAATGGAATAAGGAGAACCTTATACTGAAAGAGGTCCGCGGATGGGTCGTCGGTTGTGATGTCATAAATGAAATAATAATGCACACTTTGCTAATAACAGATTGGAAACCCCATCAATAATTCAAGAATTTGAGACCTTGCTCTTCGCAGATAAACAGGGAAGTGAGATGTCCACTTCATAGTTTTTATCACTTACTGCATATATAACAATTTTGCTATTTTCTTAGATCTTTAATGCTCCATTATTGCCCTCGGAAGTATAATATGATGCTGGTATGTCCATTCTCAATCCGTTGGTGACCTTGAAGGGAAAAATAGACAAGTCAGTCCATTGCGTCCAATCATCCATCCAAGCTGATAAAGAATCAGGGTGGTGCATCTTGTTTGTAGCTTATTATACACTGGCTCACTGCATGATAGTTGGGCTCCATATTTGTATAAAACCCTGCTAGTGGCTGTGAGGTTGGCACAATCAAAGAAGGATTAAGGAAGCCTGCAGCTGGCAGAGGAAGAGCAGTGGGGACTGGTGAGGAAAGA
>VvCYP714A1c  (1500 bp)
AGCCTATTTCAATCATTCACCCCCAAATATTTAAGTTTATTTTCAATCATTTATTTTAACAACTGAATTGACCAGGTTATTCTAAATTATTCCTAAATATTAACATCTCAAACCTCTGCATAATCAAGTGGCAATATGGTTTGTCTTTGACATGGGCAACCCACTAATCCCAATTCAGACAAAAATAAAATATGTCATGTCATACTTCCAATATGATTTTTTCATGAGAATTTAATTGATTGCGGTCACTTTGATTAGAATCTAGATGGCAAATTCAATTTAGACCATTATATATCTATATCAATATATATACATTATATGATATGGTTCACGTGAAGGAAGGGGACAAAAGGATGGATTAATTTAAAGTCTTTGATTGGCTTATGTTGTCAATATGCATGGCACCAGCCAACATATATATGGAATTTTCAAATAAAAAAACAATGCTAAAAATGAACTAAATTTTATTTTTGTAATTCTTTACCGAAGTTGATGAAATAAGACTTTTTATTTTTTATTTTTAAAAATAGAAACTCTTGTAAATTAACCTTATATCATTGAAAATTATTTTTAAAATATGAGATAGTAAAAATTTTAATTTGGTAATTTTTTAATCAATTTTTAAACATCATTACATTTTTGTAGTCATTACTCTACATTTACTTGTTATATAATTTACAATTTCCTAAATCTCGAGAACTTTTTGAATTAGAAATAGATTTTCTCAATGAGAATTTGTTCTTGTACGAACATAAAAAAGAAACTGGGGATTTTTTTTAAAAAAAATATTATTAGAAGTAATTATTTTAAAAAATAAATAAATAAGGTATTTTTCATTACATATTTAATTTATCTTTTTAAAAGATGAATTCAATTTTTTATAGTTTAAATTCGCTTTTTGAAAAAATGAATTTGCTTGTAAATTTTTACATTGAATTAAGCAAAATAATTAATTTAGAATCAATTTTGATGGGTTTTTTAAAAAGCCCAAGAAAATGGCTAGTACCCATTGTAACAACCATGAGACAGAAAGTTGTAATGTCACCAAATCACATCTGTCACCATAAAATTGAGAGGAATGATTAAGCTTAAAATAAAGTGTGTTAAAAAGCAAATAATATATCTCTAAACCCAGGAATGACAATTTGAACACGGTATTGTCATTACCGTAGTCCTATAGATTAGTCAGAAAAAGGAGGAAGATTCTATGAAAGAAACCCTAATTAGTTTGTTCAACTTCCGGACGTGACACCCACTTCATAGCTCTGTGCACTTTAATTTAAGTCGCACCACTAAAAGACCAAAAGTCACTACACATTTTTTCTCAATATTTTCTATGTATAGAGGAAATTTAAGAAAAAAAAAATGCTAATTATCTGCTTTCCATGGTGACTGGAGTGGGCTGGTAGGCTCTCGCATGGAGTTGCCCTAGTCTTCAAGTCTTTATTGTTATGCCCAAAAAGTCCCACAGAATCCCTATATAAATGGCCTCCTTACTGA
>VvCYP715A1  (1500 bp)
TAGACTTAGTTGAGAAAAGTAAAAAGGGAGGATAAAATCAAAGGAAAAAAAAAGACACGAGAAGCTTCTGGGATAGCATGCAAGTATACTTGTTTTGATTTTATTCATACAGCACTTCGAAATGGAAAACACTGATTTTGCAAGCTCTTTACCCAGATGAGAAAAAGAATTTAGAAAGTGCCTTTTTTGACTTGGAAAGCTTTTTATGTTTGAATTTTGACCATAATAATCAACACAACACGTCATGCATGATAAAGAAATTAAGGCATTTTCTCTCATATTGTATCATATTCTATGACTGGAAATTTCTCAAACCAATTTTTTCTTTGCCATGTTGGAGCACAAGTGTTTGAAAATTATGTGCTAAATAAAAAAAAAAACAAAAAAACAAAAAGAACAAAAAGTTAGTTTATGAAAAGTAAGAGTATGTATGTTTAGCTGACCGCGTTTTTTCATGATTTTTGCTTTATAAATGAAAAAAAAAATTGTTTTTATTTTTTGTTTTAGAATTTGATAATATGTTTTAAAAAAACATAGGTATAAAAAAATATTATACTCCTAAATTTTTAAAACAAATTTTGCAATTTCAAAATATATGAACAAGAATAGCTATTGTTATATAATTATTGAACATGTTTTGTTCTAATTTTTTTTTTAAAAAGGAAATTAAAATTATTAAATATGTTAGAAATTAAAATAATTTAAAATATAATTGATTTTCTTTTTTACCCATATAGTCAATAAAAATAAAAGGTATGTATTCGAGTGTTCATTTGAAAATATGTAAAAAAAAAAATGAAACGATCTTTTCATATTTCAAATCATATCATATGATATATCCATTTAAGTCAAAGATAGTACCGGAATATTATCTTTTACTTGAATGAGAATCGCCTTTAAGCAAACAATGTACGAGATTTTAATTATTTCAATAGTTTATATCACAATACACCTTTCTCAATTATAAAAATGGGAGTGTATCCAAATGCACCTAACTCCATCGTATTAGTATTTTTGTTTAGTAGAAGACTTAAATTCATTTAAAAAATAATAATTTTTATTTTATTTTTTTAATTTTTTGATTTCCATGAATGTTGTATAAATTTTATTATAATGTATAGAATGAGATGAAGAGATTGGGTACACGCGGGGAGGTAGTCTTGAGTTGATGTTGGGTTGCATTGACAAATGAAAACACAAGGTGGCAGTAGGGAAAACAAAAGAAGGAAAAGAAACAATAAAGAATAAAGCAGCAGGGGGGAAAAAGGCTGATCTTACTATTAAAAATACAACTGGAGAGAAAGTGGAGGAAGGACAAATGAAAAGATGCTCAAACATTAAATACTAGAAAAATGTTCAGACCTGCAACAATTTTCTAGTCAAATTCCGACATTCTTGAACCCACCCCTTCCACTTCTATAAATACCCACCTCATTTCTTCTTCCTGTATCTACCTAACCCAAGTCTTTTAGTGCAATCAGTCTTGAGAGAGAGAGAGAG
>VvCYP72A10a  (1500 bp)
TTATTCCAAAAACACTTTTATAAAAAATACTTTCATTAAAAATGCTTTAAATAAAAACCAATATTTTAAAAATTGAATTGACCAAGACAGTCCGACTAGATACTTTTGGCTTGCTCTCATGTCAAACCAGAATTGAACTGCTTTGGATCAAACCAGGCGATTTTGTGTACATCGGTGGGCTTTGGCTGCACATTAATTTTGCCCAAAACGGACAACTCCTCTAGCCTCAATGGTTTGTATGTGGGCTTGGTGCTTTGCTTCAAGCTTATGATAGCTCATATGTAATTTAAGGAAATCAAGGTATGTATAAGTTGTGAATGTAGGATGGATAAGTGTAGAAAAGTGGCAAAAATTAGGATTAATTTTATTCATTTTTCCTAAGGTTTTAGGTAAATATATTTAATTCCCAATAATTTTTTACACTGAGAATATAATAATCCGTTTGATAATGATTTTAAAAAATACTTTAAAATAATTTTTAAACACACTCTACGTAGTTTTGGCTAAATACACTTATTCTTTATAAACTAACCTAAGGTTGTTAATTATAAGTGTATGAAAAGATATAAATTAAACAATATATTAATTTTTAAAATTATAAAATAATAAGATATATAATTTTTTACATGCAAATAATTTTAAATATTGTATTATCATATACCCTCTTAGATATTAAAAAAAAAGGTGATTTATGGTATATTTGGTAACTATTTTTGAAAACAATTATAAAAAATAGTTTTTGAGAACAATTTTTATAAAACAAAAGTCTGTTTGAAATTTAAAATGTTTTTAACATATTTTTAATATTTTTAAATATGTTTTAAAAATAATTTTTATATCTATTATTTTATTTTTAATTATTCTATATGTTTATATAATTATTTATTAAAATAACTATTAAAAAAAACTGAAAATAACAAAAAATAACTAAAAATTATTTTTCGAAAACTTCATGTTTTTTGTCTTTAAAAACAAAAAACAGTTTTTAATTGTCAAATATATTTTTTTGTGTTTTTTATTTTAGAGAATAAAAAATTATTTTAAAAAACAGTTCTTTTAGTATATGTTATAGCACAGAAAAAATGATTTTTGAAATGGTGACGAAGTGATTATCTAAATATCACTGCTGCCTCAACTAGCAATTGTATATTGGGCAGGATAGGGTTTTCGTGATTCGCCCCATATCTCGATTTGTAGTTTTGGCAAGTTATTGACTTATTGTACGCCTAATGATATAATTTTAGAAGAATATTTGATAATTAATATCCAAAAGAAATGTTGCAGTCCACATAACACGGGAATCCTTTTCCTTATCTTTGGAAGCAAAAGAAGTGTTGTAGTCCACAGAAAGTGGAATTTTTTTCATTTTTAATTCTTGTTTTCTCGGCGCTTGTTCAAGAGAAGGGTATACTGCATTTGGCAGATCGTACAAAACTCCATTGAAACCCACAAAATTTGAGCTCCATTTCCTTCAAATTTCGTCATTCCAAGAAACCCCAA
>VvCYP72A11a  (1500 bp)
CATCCTTGAAGAGAAAGAGATAGAGCACATAAGCTTTACCCTTAAAATTAAGGCATTATATTGATGAGGTCCCAAGTAGATTGTCCTTTGAACATAGCGGTGTCCTAGCGTGGTCAATTGACCAGTAAAGATTTCACACTGCTCCTCTTGGATTGGACCCATCATTTATTTGCTTGCATAAGTAGATGAAGACCTTCAGCCTTCAGGAATCAACTTGTCAGACATTTTCATCCATTAATTTCTCAAAAATAAATTCATCTCCTTTTTTCTTTAATAACATTCATAACTATTTTTCTTTCTTTCAGTATTGATGGGAAATTCACCTAACAAAAAAGTGACGTCACTTGAATATTGAAAAGGTTTCAAAGTTCAGAATGATCGATTTATTACTGACAAGACACTATCATTGAGTTATGCTATTGGACTTCACAATCTAAAAATAGGACACTATGTATTAAAAGCGATGTGAGGTCAATTCTCCAAATTTTTTTAAATAAATATTGAAAAATGTATATGAAAGTCACACTGCTTTTGTTAAGGATCAATTTTAGTTGTACTAAAAGAAAATGCACTTGATCATTGATTTTTTAAAATAAGATTTAATTTTTTTTATAAAAAAAATATTAAATCATTGTCAACATGTAAAACTGTCTAAATAGAGATGTTAAAAATTAAATATTATTAATATAAAATCAATATTTAATTATATTATTTCATTTCTCTTATTATTATTAATTTCACAAATAATGTTTTGGTGGAGTAGAGGATGAGTGAAAAGAGAAAAAAAAATTATGAAAGTTAATTATTTGAAAATATAATAGAAAATTTTTATTAAAAAAAGAAAAAGAAAAAAGTGTTTATAAGGTAGCCATTTATTATTAAAAATAAAAAATAAAAAATAAAAAAATCCCCATTTTAAGGACCCACTTGGTCTCATGGCCATGATTTTAAATCTTCAATTTGATGAGAAATAAAATAAATATAAGCTTAAATTAAATAATATATAGCTATTTTCCCAACTTCATTCATTTACTTCTTTTTTTTAAAAAAAAAGAAGCTAAATTTAAAAAAAAATATCAAATTAAAAGAAATTATATATTCAAAAGAAGTGTTGCAGTCAACATAAAATGGAACCGTTTTCAAATGTTTTCGATAGCTTGGGAAGCAAGGCATGAGAAATGACAATCTTTTTCATTATTTGGGAAGCAAGGCAAGAGAAATATGTCCTTTTCCACCTTTTTTCTTTCCTCTTGTTTTTCCGAAGGCAACTTTTGAAAAATTGGCATCCATGAAGAAAAATCAGAAGTGGACAATTCTTCATCCTCAAGAGCACATGTTGAAGAGAAAAAGGCACATTCCTCTTTGTTGATTTTGGGCATCATGGACCATTGACAATCATTCCACAAAAACCCTATAAAACCCATAGAACATTAGCTCCATTCCCTTCAAATTTCTATCATTCCAAACAAAACCCAACTGGGATTTTGATAGAAAAAATAA
>VvCYP72A10c  (1500 bp)
TTACATATGATTTTTGCGCTCCTGCGGCAAAAAAAATCAAACGATTCCTTTGCAAATGTACAAAAATTCAAATATCACTTCCGTTAGCTCATTAAACACGGCAATTCCTATAAAAATTTGGGATAAATTCTTAAAGCATGAAAAGCCATGTACAAATTCTCTAAGCAGTCATTGACAAAGAGCTTTGCTTACCCAAAATCGAAATGCTTTCTGAAGCTTCACATGAGAGTTGGAAAAAATTTGGTGACTCTTTGGCCTCGTTGATCTCGCTTAGGTGATACTCCGCATGATGAAATGAATGACGATGAATATTTTATTTTTATTAATATATTTTTTGTTCGTAATGAATTTGGTGATTTCAATTTTATGTTTGGATATATTTAAGAATATAGGTTGAATTTGATTGATGGAATAAGATAAGATATGTATATGTTAAAATGTCACATATACCACTAAATAGAAAATGTATATTTTAGGGTATTGTTTCAAATAGAATATGATACCTTTAAAAATTATATCAAAAAAACATGATAAGTTATCCCAACTTATCTTATGTTTAACCAAATATAGGATAAGATAAGTAGTAAGATATATTATCAATTTATTTATTTATTTTATTATTTTTATATGAGATATGTTAATATCATATTAAGATATGAAATATGCATATCTTATGTAAAATGAATTTAATTTTTTTTATCATTTTTTATTGTTTTATATACTTATTTTGCAAAATAACTTTTTTTTATATATATAAATTATAGTTATAGTTAAAAAAGAAAAACTAAACAAATATTTATAAGATATGTTACCATTCTTTTATAAAGTTTAAATAAATTATTAATATAAACTAAATACAGTATAAGATATGTTACCATTCTTTTATCCTATCTTATTTTATATCTAACAAACCAAATATAACCATAATATTTATTTATTTAATTGATTATTTGTTTTCATTTCAATGTTTGGTAATAATTTGGGGATGCAAATGTAAAATGATATTAATTGAAAGAAATATTCTTACATATTGTTTAAAATAATTTTTTTAATTTTCATTTTTAAATAACTTTTAAGTCATTTTTGCTAAATAATAAAACTAGAAAATAATATTTATTCAATAAACAAAATTAATCATAAAAAGTCATACAAACTTATAAAAGTAAAGGGATAAAATAATATTTTTATTTTTATTTTTATTTTTTGTTATCATTTCTTACGGAGAGGTACTCAAAATACCTCTTGTTGGAAAGCAATTAAAGTTAGGTTTCTACTTAATTATTTTTTATTTTGTCCCTATCATTTGTTATCCAAATATGAAAATATAGGTGAAAAAATGAATGAAATATTGATTCTCAAATATTTGTCTGTTTATTACTCACGCGCTAAAATGAGGAGTAATCTCTCTCCTAAAATGCTTCACATGAACAACCTTATAAAAGGACTCCCACTCCCTCGATTTCATCATAAACATAAACGTCTCACTCTTTCTTAGTGGAA
>VvCYP72A10d  (1500 bp)
TTAATTTTATTATTCTTGCTTAGCATGTAAATATTTTTTTTTTCCTATATTATCAGAAAAGGGTGATTATAATTTTAGGAGGAAATGTCATATGAGTAGGAAGCTCATACATACAGGTTATGTCTTGGAATGGTCAAAGAAAATTTTGCACTCAACTGTCTACCAACAATAATGAAGCTATAAAGAATCCAACTATGTTATCCCGGGCGACTCACTACTAATCATTTCACCCATTTGTCCTATTCAGTTTTTAAATAAATGTGATCAGATATTTTAGATCTTACGTCACTTTCTTCTTCTTATCCATCCTATCAAACATCGGACGGGAGGAGCCCAATGCATTATTAACCGATAAAACGTTAAATTTGAAGCCTAGATACAGGCATGCATCCTTATAAGAATCCAATGACATGCACTCTCCTAAAAAATTACTTTATTAAAGCTGGTCCATGCCCTACTAGCAAGACAATAGAATATTAACAAACAAATGGCAGTCGTTCCAAAACTATTGTCGTGGATTGTTGTTAGTCATGTTATTCTTCTTAGGAAGATGGTATTCATATAGAGACAGTGTGATGGTGTATAAATAAAACAATTAATATTGCATATTTATTTTTCTTTTATTGTCCTTATCAAATGAATCAGATTGAAAGCTAAATATGAGTTTTTATTTTATTATGCATATATATATAAATAGTTGTGTAATATATGAAATAATGTTTAGAAACACAAAATTTTTCTTAATTTTCCCACTTCTATTATGTATGTTTAGACCCGTTACTTCAACAAATTAATAAAAGAATATTCTAATGCCAAGTTTAGTATGTGAGAATGGAGAGTGGGAATATGCATCCCTTTCCTCTTCCGATTAATTCCTATGTTTGGATAATTCAAGTGAGAATAAGAATAAAATAAAAAATGATTTCAAAGGAAATGAAATTTCACTTATAAGTGGAATTTCAATTCGTCCATTATAGAAGGTATTTTGATTTTCTTGTGCAATTTATTTTTAAAAACACTGTTTATATATATATAATGTGAAATGTTCTAGACGTGCTTCTCCCTATATATAGGCAATAATTCATGCTATAGTTTTATAGTATACATTTTGATGCATACAACTTTAAGATGTATCAAATTGAGAAGTTGAAAAGCCATATTGATGGAGGCGATTTAGAATAGATAGTTTTAAAATACTAGACGTGCTTCTCCCTATAGCCATTAAAGAAATCTTCTATCTCTCTTACATCCATGTCATATATATAGTTTCTAATAAGCAGTGATGGCTACACAAAACTTTGAAATGTATCGAATTGAGAAGTTGAAAAGCCATATTGATGGAGACAATTTAAAATACGAGACGTGCTTCTCCCTATAGGCATTAAAGAAATCTTCTATGTTTGCCGACACCAGAGAATGGAATAGGGGCACTTTATATACACCGGCAGCATATAAAGTGATTTAACATACCTCTCTTTTTAGAAGTCCCTCAAACCGGAA
>VvCYP72A10j  (1500 bp)
ACTCACTCCTCTCAATGTCTAGCAAAAACATGTCTTTCTCACTCCAAAACATTCACTATATGTCTCTGCAAATCTTAGAGAAAAAAATGGTGTGATTTCTTACAGCAAAAGAGAGGAATGTAAGAAGGGACCCAAAGGATGAACCTGATGAGGATTTGGTTAGTTGAAAACATAGTGGGGTTGAGGGCAAAATGAAAGCATAAAGTTGGGAAAATTGGTATGATCGGGTTCGAATGGTCAAATTTTGATTTTTGTGTTTTTCAACGGTTTAGTTTCACTCCGCACTGACATGGACTCAAGGATGCTGCTAACCTAAAGACCTAGAGGGCCAATCTCGGCACAAAAAATGGAGTCGGCTCAAAGTGCATGAAAAATATATTACTTTCCCCATTAAAAGCTAGTTCTCATATTTCATAAAGTTGGGTTATGAAAACTATATATTTCCCAAATGGCCCCATCAAAACACAAGTTTCCCTTATATATATTATGCTATAAGGACAAAATAGATGGTCTATATGCACTTTTTGGAAAAACCATATTAATGTTCTTATATTTCAAACTCTTAAAAACATTTATCTTCGCATTCATTAGGGTGAGATAAAGATTTGCATCCTATAAGACATTGAGTAAGATCCACTAGGAGCACATGTGCTTTTGTGTTACGGATGTAAGACTTAGGGATGACATTCGTTACGTAAATCTATGTATTGTTCTTTCAAATAGTTGATTTGTGATTAAAAGTTTCTAGCCACATGATTTATACATTTAAATATTCTCTAGGAGGCTGTGTGGATAGGTTTTTACGTTAAAAAAAAAAATTGTATCTCATGTTGACTTATACGTTCTTGCCCCTATAACAAAGGAGAAAGTTACAAAAATAAAAAATAATTAATTTTTGGATCAAAAAAATTTATCTATGTGGCTTTCATAATAATTTATTTCTTCTTGTCAACAAAGTTAAAAGAATTAAAAATAATTAATTTTTCGACTAAAAATTTTCTTAAGACCCATTCACCCCAGTGTCAATGGCGGCACAAGAGTGATGAATAAAAGTATGTGATATACATTATTTATCTGTTGGCGATAAAAACTAAGAAGTCTAGCCATTAAAAAAAAATATTTCTTGTACCTCTTTTCTTTGTCAGGGCTCAAAAGACATTATTTTAACATGATGGTCTAGGCTTATTGATGTACGTTTTCGTTTTCTTTTCTGTTTTTATTTCTGATTTAATTTATTTTCCCAGTTTGTGGTTCAAATTACGCCTTGTGGCATAATTTCTAGTAAGCAATGACGTCAGCAAAAATGGTGGTAGTGTGAAAAAATTTCGAATATTATAAATTATTGAGAGTTGGAATGCTGAGTCTTGATAGAGACGATTGAAGAATTTAAAACGATAACACTTGTTCTTATCTAAATTGATGGGGCCACTCATCTAAATTGATTTTCTCTACTGTGAAGTGATTCACAAATCGCTCCTGGAAGTCTCTTCCAAACCGGAA
>VvCYP72A10m  (1500 bp)
TGATTGAAGAATAATATATAAAGCATTCCATGGAATATATTTTCTTTTTTAAAATAAGCAAAAATAAAAATATAGTAATTTCTATGTATAATATATATATACAAAAAAGTCATTTTTTAAAAATAAAAAATAGAAAATATATTTAAAGAAAGCTTTGCTTTATAAATTATTATTAAAGTCTCATTTTTTAAATAATAAGATATTAATGGGAATGAATCATCTGGTCATTCCAAAGTATACATGGATTGTTATTGATGGTTATTCTTCTTGGAAGATATCATCCATACAAACCACTGCCAAATTTTGCAATGGCCTCAAGTGATAAATGACAAATACAAGAATGATGAATAAAAACAAGTTATATATATATATATATATTATTATTATTATCACAATTTTGTTTTGTCATTGCCATCATTTTTATGCCGGTGGTAAAAACTAAGGAATTTGTCCCGACTTTAAAAAACATGATTACATGATTTTAACATGAGTGACTAGACTGATTAACCTAAAATGCGTTTGAAAGTGATTCTAGAAAATATTATTAACATTTTAAACATTTGAATGATAAAAATTTTTAAATATTAAAAACGTTAAAAACACTTCTTAAAATCACTATTAAACGAACTCTTAATATGATTTTAGTAATGATTCTAGTATTTTTAATATTTGAAAGATAAAAAATTTTAAGTGTGAAAAAAAATAGAAATACTTTTTGAAATCAGTATTAAACACATGCTTAGAGTCTATTTGACAATGATTAAGGGAAGCTTTTTTATTTTAAAAAGTGTTTTTGAAAAAAAATAAAAAGTGCATTTGATAGTGATTTTGAGAATTGTTTTTAGTTTTTCTAATACTTAGAAATTTTTATTTTTCAAGTATTAGAAATGTTAAAAACACCTCATGAAATTAATATTAAACACACTCTAAGAATAGAGTGCGGTTGTAAGTGATTTTAAAAATTGTTTTTAGTATTTCTAAAACTTGAATAATAAAATCTTTTAAGTATTAAAAATATTAAAAGTACTTTATAAAATTATTACCAAACGGGTTATAAGCGTTTAACAAAATTTATGAAATACTTCTAAAAATTTGAAAATATTTTATAATATTAAAAAATCACTTAAAATATTTTTTGAGAAAATACTTATATTAAAAATACTTGCAATGGTTTATAGGTCCAGTTCAAAAGAGCACTTGCGGCATCGTGTAATAAGAATTGACGTAAGCAAAGATGGTTATACAATGAAAATTTTTATACCATAAATTACAGAGAAGTTGAAAAGCTAATATTGATAGAGACCATTTAATACACAATGTACAGGCTTGGAAATGAGAACACGTGTTCCTATCGTGAGGCAATAAGAAAGTGTTATATATTTGCCGGCCATAGCTTGCCAACGAGTAAGACAAGAAGTGATGGGCCTATTAATATAAATTGATTCTCTCAACTATGAAGTAATTTAGAGGTCGCTCCTTGAAGTCTCTTCCAAAGTGGAA
>VvCYP72A10o  (1500 bp)
ACCTGATTAGCCTTCTTGTATCCCAAACTCTTGAAAACATTTTATCTTCTCATTTGTTAGGTTAGAAAAGAGATTCCATAAGGCACAAAAGTAAAATACACTAGGAGTACACATGGTGTTTCACCATGGATGTGAAGTTCAATGGACGTGTTGGGGAGTAAGACTTAGGGATAGCATCGATCAAGTAAATCTATCTATTGTCCTTTCGAATAGTTGATTTGTGATTAGAGGTCTCTAACCACATGATGTTTATATCTAAATGGTCTCGAGAATACTGTGTGGATTTTCACGTAAAAAAATATTTGTCTTTCACATTGACTTATTTATTCTTGCCCTTATAACAAATGGGAAAGTTAAAAAATGAAAAATAATTAACTTTTGGATTAAAAAAATTATCTATGTGCCTTTTGTAATAATTTATTTCTTTTTTCAAAGAAGTTAAAAAAATAAAAAATAATTAATTTTTGGACTAAAAATTTTGTGAAGACTATATACCCATGTTAATGGCCTCATGTGGCATAAGAGAATCACAAGAATGACGAATAAAAACATGTGGTATATATTATTTGTCATTGCCATTATTCATTTGTTGGTGGTAAAAAGTAAGAAGTGTAGCTATCAAAAAGATTTTTCTTGTACCTTTTTTCTTTGTTAGAGGTGAAAAAACATGATTTTAACATGACGAGCTAGGCTTATTGATTTATGTTTTCGTTTTATTTTTTTATTTTTATTTCTGATTTTATTTTCCTAGTTTGTGTTTCACATGCCACCTTGAGGAGGGATATTGGAGATATAAAGATATTTGACTCTGCCTAAATTGAAATAAGGAGATATTTGACTTTTCCTAAACAATATAGAGGATGGAGATCTTTCTTGGTAGAATCTGATTTATTACTTTTTATTGTATATAAGATTATTTCTATTTTTGTATATAAGGCTAAGTATCTTTTAAAAATATATAAAAAAAAGTATTTTCTCAATTCTTGTCAAAACTCAAAAAACATGATTTTAAGGTCACGGGCTAGGTTTATTGATCTATATTTTGGTTTTGTTTTATATTTTTATTTCTGATTTTTTTTTTTTTTCCAGTTTGTGGTTCAAAATAGCCTTTGTGGCACAATTGCTAATAAGCAATGACGTTAGCAAAGATGGTGATACTTTGAAAAAGTTTGGAATATTATGAACTATTGAGAAGTTGAAAAGCTAATTACATTAATTGATAGGAACGATTGAAGATTTTAAAATGATAAAACGTGAGTCTAACACTTGTTCTCAGTGAAATATTATAAATCACTGAGAAGTTGAAAAGCTAACATCGATAGGGACTTTAAAACGATTGAAGACTTTAAAACGATCACACTTGTTCTTATCTTGAGGAAAAAATAGTGTCTTATATACTTTAATTCCTGGCCAATGAATCCGATAGGATAAGAAGTGATAGGGGTATTAATCTAAATTGATTTTCTCAACTGTGAAGCAATTCACAGATCGCTCCTGGAA
>VvCYP72A11d  (1500 bp)
ATGTTAGTATAAAGTTTTAAGGTTTTATGAAAAATTAATAATTTATATGCATAAGGGTGTTGGTGATAGTGTAAGATTACACAAGAATTTATGATTAATTATTTTGAGTTTTTTTTATAGAGCTGATTAACTATTAATCTCATTAGGATTAATTAATTACTTAGAACCTAGATTTTTTTTTCAATAATCAAGAAATCACTACTGTCTAATAAAATATGTGTTGGCGATGATTTTATTTATTTATTTATTTATCGTGTATTAACATAGTACATAGACCTACCACCATGCAATCATAAACTTAAAAGATGCGATGATGATTGATTGAAAGAATTAGGTATCGAAAGGATGCCCGCATCGCAAAAAGGTCCCACTTAGAAAGGATAAAACAATTATCTACTTCCTTGTTTACTTCAAGGGAAACCAATTTAATTTGTTTTTAGTTACCATAATAAATACTTTGGGATTAGTGTTACCCAATATGGGTTCGGAGATTGCCTCGGGATGGGTGTCTCATTGAACATGATAAAAAGATATGGCCACACACTCTCTAATAGTTAATTCAAGTGCTTGTCTGATATTGAGATGGCTAAAGCCTTTTTTGTTATATTAGAAAAGATTATTTGTATTTGTCACCTTCTTTTATGTTGCCAAGATTAGCCAGGTGTCCAGACCTACACTGATGCCACCATAAACTCAAAGCTGCAAAGTTGATTGAATTGATCAGGTCTTTCAAATGATACAAAAAAAAAATTGATGTCAGTTTCTATGGTATTGTAAAAATATTACAAGCTTTTGTTTTCTCTTCACGAGAAACCATTTTATTTGTTTTTGGCTATCGTAAGCAAAATAATCTGCTAAAATTTCTTTCATAAGGTTCTTTCTTTTCTATTTTCTTTACTAGGCCCTTTACTTTCTTAATTAATACGTATATTCACTTTCATATGTTCAAGTTGTGCTATTTGGATTCTATTTGAAGGCATCCTTCTAAGAATCCAATGATGTCTTTGGCTTCTAGACATATTATTTAACGAAGAGCCATTACATGACAATGGAATATGGACTTGGATGTGTCTTTTGGTAACCCATCTTTGTCACAAGACAACTGAAGATAAACAAATACTGAAGGCAGGCAGCATATCCGTGGAAAAATCTCCACCATAGGAACAAAACAATTTTTTTTTTAATTTTTTTTTTATAATAAGATAACATTAGTGAGAATTGATGATCTTGTCCTTTCAAAATTGTTGTGATATTGGATGACTACTACTGCCATATTATTTAAGGATAGGCATGATATATCATTGATAAATGGAGGTTTTTGTCGTCTGTGTTTGTCCACGTTTTTTTGTTAGAAAAAGGAAGAAAAAATAGACAAAGACTTGGTTAATAACCCCTGGTATAAGTGCTAATAAAAAACCATATGATGGAACAAACCCTATTAACCGTCTAGTACAACATTATAAAGTTGTTCCCAAGCCTCTGTTCAAAACATTCTCAAAC
>VvCYP72A10q  (1500 bp)
ACTATGCAATCATAAACTTAAAAGATGCGATGATGATTATCGAAAGAATTAGGTATCGAAATGATGCATACATCTTAAAAAAGTCCCACGTAGAGGGCATAAAACAATTACCGACTTCAATGATTACTACAAGGGAAACCAATTTAATTTGTTTTTAGTTATCATAATTAAAACTTTGGGATTAGTATTGCCCAATATAGGTTGGGAGATTGTCTCGGGATGGGTGTCTCATTGAACATGATAAAAAGATATAGCGAGAAGATATGACCACACACTCTCTAATGGTTAATTTAAGTGCTTGTCAGATATTGAGATGGCTAAAACCTTTTTTGATATATAATGATTTTTTTTTTTTTTGTTAATAAATATGTTTTCAAATTTTATATCATTTTTATTTTTATTTTTTTCCAATTCTATTTTTATCCCATATTTATTTTATTTAAACCAAAAATTGTTGAGAAGGGAGGAAGAAAGAAGGCCACCGGTTCTTCCCTTAACTGGTTAAATGGAATTTTTATTTCAAATTTAAAATAGATGGCCAAGATGTAATATTGAACACCCAATGGCTTAGAAAAACTTTTAGATAGGTACCGAAGAGGTACCCTAAAATTTTCCTTAGAAAAGATATATGTATTTGTCATTTTCTTTTATGTTGCCAAGATTAGCCAGGTGTCCAGACCTACATTGATGCAAGCATAAACTCAAAGCTGCAAAGTTGATTGAATTGATCAGGTCTTTCAAATGATACCTGCCTGCCTAGCAAGAAAAAGTATTCATGTCAGTTTATAAGCAAAGAAAGGTATTCATATTTGTTTCTATGGCATTGTAAAACTATTACAAGCTTTTGTTTGTTTCTATTTTCTTTATTAGGCCCTTTACTTTCTTAATTTTATAAGTATATTTCTCTGGTAACCCATCTTTGTCACAAGACATATTATTTAGCGAAGAGCCATTACATGGCCTTGGATATGTCTTCTGGTAACCCATCTTTGTCACAAGACAACTGAAGATAAACATATACTAAAGGGAAGCAGCATGTCCGTAGAAAAATCTCCACTATAGGAACAAAACTATTTTTTATTTTATTTTATAATAAGGTAACATTAGTGAGAATTGATGACTTGTCCTTTCAAAATTGTTGTGATACACAGATAAATGGAGGTTTCTGTCGTTTGTATTTGTCTATGGTTTTTTGTTAGAAAAATAAAAATATAGACAAAGACATAATTAATAAACCCCTGGCATAATTGCTTATTAATAAACCCCTGACAAAGACAAAGACATAATTGCATATTATTTAAGGGTAGACATGATATATCATTGCTTATTAATAATTGCATAATGACGTCCACATTTTTTTGTTAGAAAAAGGAAGAAAAAACAGACAAAGACTTGGTTAATAATTGCTAATAACAACCATATGATGGACCAAACCCTATTAACCGTGTAGTACAACATTATAAAGTTGTTCCCAAGCCTCTCTTCAAAACATTCTCAAAC
>VvCYP72A10t  (1500 bp)
CCAAATATGAAAATTAAATATGGACATAAACAAAGGGGATATGAAGAAAAAACAAAATTTGAAAAGATGCCACCCGAAACGGCTACAATATCTCACCCGAAAACACCTAACAACACGAAAACATCCAACAATACACAAAGACAACTGAAAGCACTTGAAAATAACAGCCGATGGAGATGAGTGAAAAACACAAGTACCCGGAAAAGAGACGAGTATGGAGAAGAGAGGAAAATATTGGGAAACTCGACAAAAGAGGGAGAAAACAGAAACCCGACCTGGCTGTCGAGGATAAGTGGAAAAGATACCAAATTGGGGGGAGGGAACGGGAAATGAGTGAGAGAATAGGATGGGGAACAACAGCTACACAGCCGGCTATGGACGATGATGAGTGGAGATGAGAGCACGGGGACACAAGTGGGGGAAAAACGGGAAATGGGTGAGAGAATAGGATATATGGGGAACAATAGCTACACTAGATGACTATGGAGAATGATGAGTGGAAATGAGAGCACGGGGACACAACCAATTATGGAGGAGAAGGCGGTCGGCTATGGAGGAGAAGAGAGGGGAAAAACGGGAAAATGGGCTGAGAGGGGGAGAGAACAGGTACCCAGTTTTTTTTTTTCTTCATTTTTTCATTTTCATTTTTTCTTTTTCTTTTGGATGGCTGAGATTTAATCTCTTTCATTCAAAGACTCAAAAAAAAAAAAACAAGGCATGCTACCTCCCCCGGCACCATAGAATTTTCCATATATATATATATATATATATATATATATATATATATATATATATATATATATATATATATATATATATATATTACTAAATAATCTATAATAAATAAATTTAAATTTATTTATTTATGATATTAAAATTATTTAGTTTTTACCATGTTGAATTTAAATTTATAAATATAAAAATTATTCATTTTTGACCGGATTGAATTTAAAATTATGAAATATCAATTCATTAAAAAATATATGTTAAATATTTATCTAGTAAAAATCATTTGCCATAAATTGATATTGTAATTAAATTTGGTTTTTATTATGAATATAAGATTTGTACTAAAATATTATCATTTTTTTTTTCACAAATACATTAGACGGTTAAACATGATTTTTTTTACTATAAATAAAAATTTTATTCCTAAAAAACCTTTTTTATCATACAAAAATTATTACAACAATCTATTTATTTTATTTTATTTTATTTTATGCCATAAAATACAAGTCATGCCAAAAAAAATAATAATAATAATAACAAAAGGAGAATTTTTGTAGTTAATAATTGAGAAATTAAAGACTATCGAAGACTTTAAAAGGATGACATGTGTCCTTATCTCGAGGAAATTAAAGACTTATAGATTAGTCGGCCACTAATTCGTGGCCAATGAATCCGATAGGATAAGAAGTCGTGGGGCTACTCATCTAAATTGATTTTCTCAATTGTGAAGCAATTCACAGAGCACTCCTGGAAGTCTTTTCCAAACTGGAA
>VvCYP72A10v  (1500 bp)
AAAAATCATTTGTATTTTACAATATTTTTAAAAAGTTTTTTTAATATAAAAATTATTTTTTAAGGTTGAAAAATTTTTAAAAATCATTTATAAGACTTTTTAGAAAAACGTTTGATATGTGGTTATCTTAAAATTAATTGTGGAGAAAATATTTTATTAAAAACCCTTTAAATAAAAACCAATAGGATAAAATTGTTGACCGGACCCTTTTCCGGTGTGGTTTTCACTTTTAGCCCGCTCCCATGTCAAACCGGATCCCACTCTCATATCAAACCGGAATTGAACCGCTCCGGATCAAACCGTAATTTTACCCACAATGTGCATCTCCAGCATCAGCCAGGATTGCATCTGTGAACAGAAGGAACAAAGGCCACTGGGCTATCTATAAACTTTGTAAAAATTAATGCACATAAATATATACTATAATTTTGGTATTTTTTTTGAGTTTCATTAATTTAAACTCTTAATTAAACATAAACATTAAGTGCACATTTATTTTTTAAGATAAGTTATGAAAAGAATATAAATTAAATAATATAATAATTTTTAAAATAATAAAATAATAAAATATATAATTTTTCACATGTAAAATTCTTTTCATCCTAACTATATCTTCACATTTAAATATTATAAATATTTTATTAAATAAAATTTAAAATATTAATTCATTTATATTTATCCTTATAATCATTTAATTTGATATTAATATTATTAAAATTTTGAATTATATATATATATATTTAATTTTTTATAAATACTTTTACTTTATATAATATATAAATTATATATTTATGATGTCATATGTTTGATCATGATTTAATCATTGCTTCAATTAGTAAACCGTGAATAGACAATTTAGCAATTCATTGGTTTGATTATGAAAACATTGAAAAAAACATCGGGTAAGATATTATCCAAATGTCAGTGCTTTGATTATTAGATTTTTGAAGTGGTGATCAAGTGATTATCCAAATGTCAGTGCTGCCTCCACATCTTGATTTGTAGTTAATGGAAGTTAATGCACATGTAATGATATAATTTTAGAAAAACATACGATAAGAAATGTTTCAGTCCACATCAAGTGGGAATCCTTTTCATCATCATGGGAAACAAAAGAAAGTGGAATCTTTTTCATTATTACTTCTTGTTTTTTCAACACTTGTTCAAGAGAAGGGTAGACTGCATTTTAGAAAAACATACGATAAGAAATGTTGCAGTCCACATCAAGTGGGAATCCTTTTCATCATAATGGGAAGCAAAAGAAAGTGGAATCTTTTTCATTATTACTTCTTGTTTTTTCAACACTTGTTCAAGAGAAGGGTAGACTGCATTTGGCATATTTTGGGCATCAAACTAATTTAATCATTGTACAAAACCCCATTAAAACCCACAAAATTTTAGCTTCATCATTCCAAGAAAACCCAA
>VvCYP721A1a  (1500 bp)
TTTACTGTGTTGTCTCAGATGGAGAGCGATGGAGGAGGAGAATAAAGGAGAGAGGTATGAACGAAAGGGAATAAAGATATCGGGAATCACTGGGGGCATTTTTGGAATATTTCAAAAAAATTGAAGTGTTTTTTTAAAAAAAACACCTGTCAAGTGATTCTCTAAAAATCACTTCAAGTGTTTTTCCAGATTTTCAAAAGTGTTTTTTAAAATTTGCCAAACACTTTATTTTCATCCCAAAAACACTTAAAAGTGTTTTTAAGGGTAGAAATACTTTTAAAAATCACTGTCAAACGGGCTCTAAAAGGAGCTCAACGGTTGTTTTCAATTTTGAAATGAATCTGGAAGGGTTTTTAAGCATATTTAGTAAACTTTAAATATTAAATTAAAATAATTAACTTATTCTTAATTTCAAAAAAAGTTTTACCTTATTTATCCATATTACTATATTTTAAAACTATGATTTTAATCAATTTATTATAATAAATATTTTATGATTATCTTTTATATGTACCATACTTTAAACATAAATGTTTTATAAATAAATTTATTACTTATAATTAATAAATATAAATTAAAATTAAAATTAATGAGAATAAATATTAATTAAAATTAATGAGAATAAATATGATAATATAATAAATTAAACTAAATTTTAAATTAATTTTATCAAATAATTTTTATACTTAAAATTTAAAAAAATAATAATAATAAGTTTTAAATAAGTTAAAGTCAATCTAACTCTATGTAAATAATAAGTATTAAATTTTATCAAACATCTCATATAACAACGACTTATTTATCAAAAAAAACTTCATTAAACATTTTCATCTATTTAATAAATTGAGTTGATTTAGTAGAGGTTTGATAAGTTAACCTAATAACTTAAATTGATTTAATAACTTAATTTTATTAAGTAAATTAAGAAGATTTAATAAAATAACTTAAAATAAAAAAATAATTTTAAGCGATAAGTATAAGCAATTAACTTATTTTTAAGTTTATTTTTTCATTTTACTTTTTCATCTTGCTTGTTTTAAATATCTCTATGATTTTTATTATTATTTCATGACATTATTATTATTCAACCTTTTTTATTATAATTATACTTTATAAAAATAAATAAGTCAATTTGATAATTTAAAATTAATTTAAAATTAATTTTATTAAACAAGTAAAAATTAAATAATAAGTGGTAAATCATTTAAATATAATTTAACTTAAAATGAAATTTAAGTATTAAGTGTTAAATTTTAGCAAGCACCCCTTAGTCCAAAACCAGGAACCTTATTAACCCTTTCCATCTATCACTCACGTCCGGATAACAATGGCACGTATGCTCTCACCCACTCTTCCTTTTTCTAAGTTGGGCCCCACTCCCCTCTCTGACTTTGCTCTCCCATCATGGGCATGTAGTCCAGCCTCTCCCTGCAATTAAAATCCACTACACTTTCCCCAAAACTCCATCTCTCTCTGCCCTTTCTTTCATCTACCACCCCC
>VvCYP721A1d  (1500 bp)
TGCAGGATCTTTTCCATCTAGTCTCATTCTTGCTAGATGGATTCTCCGAAAAGGCACAAAGAATGGAAGAAATTTGTCTGACTTCAATCAAGCTAGATGAACCTAACTCCAGTTGGTTGAGAATCAACAATATATATATATATATATATATATATATATGTTTCTTTTCGACGATATTTTAATCCCTTATGACAAGTTACGCGCTTCTCCTTTTATTTTGATTTTTTTTATATTGAAATTATCAATTGTCGGATTTAATTTAATAGATAATTATCTAAATTTGATCATTTCATTAAATTTTTTCAAAAAAATTATTTCAAATGCATATGATTTTTCTAATATGATATACCTATGAGACACAACAGAGTTTGTTATCATAATTCATTATTTTAAATATTCTTCTTCTAATGAATTATGAAAAGATTCCTCACAATATTCCACAACTCAAGTCAAACAACTTAGAAATAATCAATAATATTTCAAGACTTCAAATTTGTACCCTTTATTTCTATTAATTTTTCTGTTATTAAAATTGATTTCTCTCCCCTAAATATTAATTTAATTATTATATAAAATTTATACTTTTATTATTATTGAGCTCCCATGTCTAAAAAAGTACGTATTTCCCCATGCAAACACAAATAAAATTCCATGATTTTCAATTTTAAAGGGTTTGATCTCTCTTTCATATTATTTTATTTTTTTAACTACTATAATTAGGAATTTCATTTTAGAGTGAGTTAAGAATTTCATATAAGCCATCTCTCATTTGTTTTTCTTAAACTTCTTCCATTTTTGCAAGTTGTGTGTAAGTTTACTAAGAACTAATTAATAGTCATGTAAAACGTTCTATTGTTAAGTATCATGTAAAATGTCCAAAGACATAAATGACAGTAGGGGTAACAATGAGGTGTGTTTGGAAGGGGTCACCCCGTCTTAATTCCTATTCGTTTAACTTTCTTTTCTTTTTTTTAAAAAAAAATTATGTTTAAATTACATTAAAATAAATATATTTTATAAATAATTAATTTATTATGTTTTTTTATAACTTATTTTATTAAAAAAAATATTTTATTATTATCTACATATTAAAAATAGCAAAATAAAAATTAAATTAATTTAATTTTAAAAATTAATTTTATATATAATTGAGATAAAGCGGGATAAGGCAATACCATACCTACTCCAAGTTTTAAAAAAAAATGGCAAACCCGTTCCAAGATCATTTAATTAATATTAAAACTCCCCGTTTGGAGCAGGGCTGATGGGTAAAAAAACCATCCCATTACCATTCCTATATTAACAAATTTCTGTGGAACATTGTATTTATTTGCTTTTATATTATTAAAATTCAAGTTCTAGATCAATAGATCCTACATTCAGAATTAGGCCCTGCTCATCCGTGACTACGCTCCTTTTTCACATCCACCTTCTTTAGCAGTGTCGGCAAAGTCCATCGATCACCACAACCCTATCTATCCGTCTCTGTGATCCACCACC
>VvCYP735A1  (1500 bp)
CTGCGCATTCAATTCTCTGTTGTTACCACTTTTGGCTACATCACTGTTTCCATTTCATTTTCTTCAATTTTTCTATCTTCATAAAATATTATAAAATAATTTGAGCAATTTATGAACTTCTCATTCTCAAATATGATAACATTTCTATGGAAATTAAAAAATTAAAAAATTAAAAATTTAAATTAAAAACCCATTTATGGAAAGTGAGGGAGTGCATGATTGTGGGTTTTTCAATTGAAAATAGAGAGCCCCAGTTTGGATTTCCATTAAAGAACCTTCCAAAATTCCAATAGAGACCAAGGCAATGCATAAAATATGGCCCATTGGCTTATTATATAAAATAAATCAGTATTGGGTCCATTATTCTTTCTATAGACTAGCATGCTAGCTTTCCATTTTTATCTTTCAACACCAAATATATATATACTTGTTATCAAATCACGAAGCATCTGATAATAAAATAAACACCCATCATCATTAAAAAAAAATTATAATAAAAGATGAGAAAATCTTATATAAATATTATCCTTTTTGAATCCAATACTTAATAGTATTTGTTTTTCTACTTAATTCTAAATAAAATTTAAAATTGAATAGTACTAAATAATAATAAGTATTACATAATTTGTTTTTGTAATATTTTATTTTTATTAAGTATTGAAAAATAATAAATAAAAAAAAGGTTAATATGTTATTTTTTTCTATTTTAAAAAAGTTTAATATTTTGAATTTTTTCATTTAACCAAAAATTTATAATAAGTTATAAAAAAAAACTCGAAAAACAAATAATTTAAAGTTTAAAAACAAATTATTTTAGGCAAAAAGTTAAAAATAAATAAACACCCTCTTATTCGCGATGTCACGATCAAATACACAATTCAGAAAAGATCGAAATTTTTGAATGATTAAAATAATAATTTAATTGCCAAGGCAATTTCCCAAGTAATTAAAGGCAAGGTCAACGGTTAATAGGTATGGCCAGAGGCCGGGTATGCCATCTTAGGCGTTAAAAGTTCCTCCCCTGCGTCTCTGGTGGACTTCAAAAGGGGCACTGTATTTATTGCCACCACCTCTTTTCGTGAAAACAAAATATTTGATTTGATTGACTCCTCTGTAAAATTGGAAATTATTATAGTTTATAGAAATGGATTCAAGAGGAAGGATCTCTGCATGTTTGCACCATGTACAAAATAGATAAATTTACATATTCCATAAAAGAAATAATAAAGAGTGAGGGGGGAATTGGCTTTGCCTCCATAAAATGAAGGAAAGAAAAAGTAATGATAATAATGATAAAAAGGAAAAAAGAAAAAGGGAGAGAAAAAACATGAATTTTTTTGCTTCAAGTTTAAGAAAAAGGAGATTTCATATTGATTTTCACATTTCTTTTCGAGGACTTTTTTAAGGATGGGGAGGCTATAAATTGGAGGCACCAGGGGAGTTCAAGTCATATTTCAGAGGGGGGAGAGAGAGAGAGAGAGAGAGAGAGAGAAAGAGAGA
>VvCYP74A1a  (1500 bp)
GAGTTTCAGGTTCTATACCAAAAATGACGTAGGGAGGGTCATGTTTTTGTATGTTCACATACGTAATTATTATTAAGCTTAGTTTACGATCGTTGCTTGGAGAATTGTGTAACGTCCGATACAATTTATTTTGCAATAACAAATTGGGCTTAATTTTTAGCCCACGACCATTAATAAACAAGGTTCACATGATGCTTGGGGCCCTGAAATTGTTCGTCAAAAAATATTGGGCTAGGCCCATATATATGGTGCACCAATAAAATAAATAAAACCGGTTCTGGACCCGTTTTAGCCCATATGTGGTGAGTTAAAAGGTTTGTAAGGGCCCATATGGAGTGGGTCGATGCAAATGGGCTGGTGCCTCACAGGAAGTTTTAGGCACGCTGCAACATATTCTGAGTTCAGAACGTGATTGAGATCGCAAAAAGTTGCAATATTATCGAAAATAGATAAATAAAAAAAGGGACAGTTGGATCCAGTTGGACCAAAAATTAAGATTTGGATATAAAATATGAAAAGATTAATATAGTTTTCAAAACTATTTTGAATATTTTCTACCATAATGTTTTATAAACTTTTTTATCTGAATTTTTTTAATAATTATTCTGAAAATTTATTATTTTTAGAAAATTAATTTTTTTAAAAAAATATTCTAAAAATATATCATTTAAAAAAAAAAATTTGACGTATTTTTAGTTATTTTTTACATACATAATTTTAAATATATGTATTTTCCAAGATATTTGATTTTTAAATAATAATAATAACAATTTATTTTTATTTTTTTGGAAAATAGTGTATTTTTTTTCAAATCACTAAATTAAATTGAATTTTATTGAGGTTTGTAAAAGTAATAAAATTTAAATTAATGTTTTTCTACTCTTTCTTTTTTTTCATAGTCAATAAATATCATTTTTGAAAAGATAAAAAATTCATATCTTTCTTCTCAATTTTCACACTTTTTCTAGGTTTTTGGCTTAAATAGTGGATTTATATGGATCAAAACTTCATTTTTGGGTCAAACGGTCCAAAACACAATTGTCCCACAAAAAAATAAAGTGATAATCATTGGTTTTATTTTTTAAGTAAACAAGCTTAGAAACGCGTGGAAAATGAGGTACTGTGGTCTTTCTTTACTTACACTATTGCATATTATTGTATTAAATATCTATACATGTTTGTGTTGAATCCTAGTACTATATCATAGAAAACATCTATATTTATGAAGAGAATTTTGAAAATTATGATATATATTTTTTAATTTATTTTTTCTAAGATGGTGCATTTGTCGTGGGCATATGATATTCAAAGCTGAGGGGTGTGATTCTTGTGAACGCATATTAAATTTGAGTAAAATGGTGCACTAGTTGTTTATATCACTAAGAGCGGACCTCTCCTGCTCTATTTAACAACAATCTTCATCGTCTTCTTAGCAATTTTGTACTTACTTTGTGACCTTGGCTTTCTCTGCTCCACCCTCCACCCTCCATAGCCACCACC
>VvCYP74A1b  (1500 bp)
TAAGAGGATGAAAAATTCATTACTTTCATGTTGAAATCATCTATGATTGGTAGCAGCCACATCAATTTCCTTTTTTTCATAAAAAAATTATATTATCTTTATTATAGTTAAAAGATATGAAAAAATTGGTTGAAAAAACTGCCATTAGAAGATCCAACATTTGAACCTTGAGAGGGATGTTTGAATGCCCCCTAAATATATATATATATATAAAGGGGAGATTGAGATCTTTCTTCTAAAGAGGGACGATTGAAATTTAGAATTTAAAATCGAAATATATAACTCAATATATTGAGACTTGCCGTTTGGACAATCTAATTTAAGAGGCAAAAGTTAGGTTATTACAAATATAAATATGATGGAGATCTGCAAGCTGCTTTGCCAACCTTCACACCAGTGGGGCCATGCATTTCAATACTTCATTTCCCATTGGCAAAGACTCTTCATGGCGGTGGATTGCTTAATTGACTAAATCAGAAAATGATAATATCTTATCGGTCTACTAATTCAATTGTATATATGACTAGGGATGATAATATTGCGGGTTTTTTCAAGCATGCCACCAATGTAGTTAATAATAAAATAAGTTTAGGATTAAAATAAACTAATTAATGATGAGTTTGTATTATTATTATTTTTTCAAATTCGAATAAATTTAGGTAATATAAAGGGTGATAATTCGTATTTGTGGGTTCTGTTCATATCATGTTAAAGACTAAGTATTCTACTATATAAGCCAATTCAAATTTGACATAAATAATAATAATGTGAAAAATATAAATTCAAATACTTCATAATTATTAAACAGTTAATATATTGTATGTAACCTATTTAACCCATTTAATAATTAAATCTTCATATTTGATAATATATTTTTATGGTTAATGTTTGAACTATACATGTTTATGACTCAATTGACATGTTTATTTAAAAAGAAAATTTAAAATAAATTAAATAATTTAAAAATATAATTAGGTTAATCAATCAGATTATTAAAGGAGTAGATTTGAGTCGTGTTATATAGGTTGGTAGAAAAACTATCCATTTTTAAACGAATTATGTAGGGTTGAGTCCAATTTGATTCTAACTTATTTATATTTACTCAAATTTCAATCACGTTCATGCGGTCAACAAATATGATAAAAAAATTTGATCTGATCACGTTCGAACAACAGTCATAGTGTAAGCGTATGATAGAAAAGGTGGTGAATAATTGCACCATCCTTCATAATTTATTAGTGTGTTGAAGCCATTCAACGCCATGGCTTTGCTTATCAATGGTGTGTGTCCTTTGAATACTTCAACTGCTCAATAAATTGCAGACATCTACAGCGGTGGCGAGCACGGTTGCGTGTCGTTCCAAGTCTGCATTCCTTTTTATTTGTAGAACAATTTTGATATCTTTCACCTACGAATAATACCTTCTGGATCTGTCATTCTTCTATCACCATTCTTCAATCCATTGCTGTTGCAGTACCCCACCCCTTCCGGATTTTCGCA
>VvCYP74A1c  (1500 bp)
AAAAAAAATGAAAAATTCATTACTTTCATGTTGAAATCATCTATGATTGGTAGGAGCCACATCAATTTCTTTTTTTGCATAAAAATTTATATTATCTTTTATTATAGTTAAAATATATGAAAAAATGGGTTGAAAAAACTGCCATTGGAAGATCCACATTTGAACCTTGAGAGGGATGTTTGAATGCCCCCTAGATCTAAAAAATAAGAAATAAAAAAAATAAAAAAATCCAAATTCAACCTTCACACCAGTGGGGCCATGCATTTGAATACCTTATTTCCCGTTGCCAATGACTCATCATGGTGGTGGATTGCTTAATTGTCTAAATCAGAAAATGATAATACCTTTTCACTCCGTTAATTCAATTGTACATATGACTAGGGATGATAATGTTACGAGTTTTTTTAAAGCACATCACCAATGTAGTTAATAATAAAACAAGTTTAGTATTAAAATAAATTAATTAGTGATGAGTTTGTATTATTATTATTATTATTATTTTTAATTCGAACAAATTTAAGTAATATCAGGATGATAATTCATATTGGTGGATCGTGTTCATGTCATATTAAAGACTAATCAATTCAAATCTAACATGAATAATCATTATGTGAAAAATATAAATCTAAATATTTTATAATTATTAAACAGTTAACACGTCGTGTGTAACATATTTAACCCATTTAATAATTAAATTTTCATATTTGACAAGATATTTTTATGATTAATGTTTCAGTTAAACATGTTTATGATGTAATTGATATATTTATTTAAATATAAATTTAAAATAAATTAAATAAATATTAAATAATTTAAAAAATAATTAGGTTAATGGATTATTAAAGGAGTAGATTAGAGTAATGTTTTACACGTTTGATAAAAAAACTATCCATTTTTAAACGAATTATGTAGGGTTGACTCAAATTTAACTTATTTATATTCGATTCAAATTCCAAAAGACATTAAGTTACTTTACTACGTAACGTATATCCTATCCATTATATACATATATATATATATATATATATATATATATATATATATATATATATAATTGGATATAATTTATATATTTGGATAGCGGTATCGGTCATCCATTCGAAAACTTAATTTATATGATCGGGATGGGATATCCATCCGTTAAGTCAACTCATGATAAAAAAATTTGATCTGATCACGTTCGACCTACAGTCATGGTGCAAGGGGGGTGAATAGTTGCACCGTCCTTCATAATTATTTCATTCAACGTCATGGCTAGCTTTGCTTATCAATGGTGTGTGTCCGGCCTTTGAATACTTCAACTGCTCAATAACTTGCAGAGACATCTACAGCGGTGGCCAGCACGCTTGCGTATCGTTCCAAGTCTGCATTCCTTTTTATTTGTATAACAATTTTGATCATCTTTCAACTACGAATAATACCTTTTGGATCTGTCATTCTTCTATCACCATCCTTCAATCCATTGCTGTTGCAGTACCCCACCCCTTCCGGATTTTCGCA
>VvCYP74B2  (1500 bp)
ATAACAAATTAAAATTTTCAATAATTCAATTAAAAAACAAAGATAAAAATAAAAATTCACATAGTTCCTTCATAATCTTCGATTATGAAAATATATAAAATTGATATAACTTCATGATATGAGTCATACAAAATTTATTATATGAATATATAAGATAGTTGCTTCAAGTTATGAAAAATTATCATATTTCTATAGTTCTTCATACCTTCGGGTTGAGAGAATTTCTATTTTTATATGATTCCACATATACAATTTAATCAAAATCGTATAAAAATAAAAACCAATCTAGTGATAAAAATCACATTAAAATTCCATAATATCTAAGAATAAAAATAAAAGAATAATTTTGTTATATATATATATATATATGTATATATAGTAAACCCTTATTCATATAGCTTTTGATTATATGAATTTTGATATTTATTAATTTACTAACATTTTCCCCATGGTTTTAGGGTATGAATAATTAGAGTTGAGCAATGTTGTAAAAATATAAATGATTGGTCAATTATAACAATTACATAAAAAGTAAAATTATATTGATTATGTTGTAGATCTTGATAATGTGTTGTAAAATAAAATTAAATATAAAAAGATTATTATTATTATTATTATTGTGTGAACCTCTTATTTTTAATATATTAAATATTAAATGGTATTAAAAACATTATTTCTATAGTTCTTTGTACCTTCGGGTTAAGAGAATTTCTATTTTTACATGATTCTACATATACAATTTAATCAAAATCGTATAAAAATAAAAACCAATCTAATGATAAAAATCACATTAAAATTCCATAATATCTAATAATAAAAATAAAAGAATAATTTTGTTATATATATATATAGTAAAACTTTACTCATATAACTTTTGATTATATGAATTTTGATATTTATTAATTTACTAGCATTTTTTCCATAGTTTCAGACATGAATAATTAGAGTTAGACAATGTTGTAAAAATATAAATGATTGGTCAATTATAACAATTACATAAAAAGTAAAATTATATTGATTCGGTTGTAAATCATATTGATAACGTGTTGTAAAATAAAATTAAACATAAAAAGATTATTATTATTTTTGAGTGAACCTCTTATTTTTAATTGGTGCAAAAATACGTCACTAGTTAGGAGTTAGATGGTGCCACGTGTACTAATTCGATAACTACTGTTGGGTCGAAGTATCATTCATCTTGGAAAAATCTTCAAATTTCTAACTTAAAAAGGATAACGTTTTGTCCTTCTAAAACCTAATTGGCACGTTTTCTAATAAAAGTAAAATCATCAAAATGTGAACACTTGAAATTGTTGATAATTTTTTGAAGAGAAGAAACCTTTAACTTGTGTGGACCAGCTTTCCATTTCACAGTCCCACATCGCTGTCACATTCACTGCCTCCACATATCATCACCAAGATTCGACAGATATTTATTTAACCTTTCCCCTCTTGGATCCCAAACTGCCTACCACACACCGTTTCTTCTCCTGTAGAATC
>VvCYP74A1e  (1500 bp)
GAGTTTCAGGTTCTATACCAAAAATGACGTAGGGAGGGTCATGTTTTTGTATGTTCACATACGTAATTATTATTAAGCTTAGTTTACGATCGTTGCTTGGAGAATTGTGTAACGTCCGATACAATTTATTTTGCAATAACAAATTGGGCTTAATTTTTAGCCCACGACCATTAATAAACAAGGTTCACATGATGCTTGGGGCCCTGAAATTGTTCGTCAAAAAATATTGGGCTAGGCCCATATATATGGTGCACCAATAAAATAAATAAAACCGGTTCTGGACCCGTTTTAGCCCATATGTGGTGAGTTAAAAGGTTTGTAAGGGCCCATATGGAGTGGGTCGATGCAAATGGGCTGGTGCCTCACAGGAAGTTTTAGGCACGCTGCAACATATTCTGAGTTCAGAACGTGATTGAGATCGCAAAAAGTTGCAATATTATCGAAAATAGATAAATAAAAAAAGGGACAGTTGGATCCAGTTGGACCAAAAATTAAGATTTGGATATAAAATATGAAAAGATTAATATAGTTTTCAAAACTATTTTGAATATTTTCTACCATAATGTTTTATAAACTTTTTTATCTGAATTTTTTTAATAATTATTCTGAAAATTTATTATTTTTAGAAAATTAATTTTTTTAAAAAAATATTCTAAAAATATATCATTTAAAAAAAAAAATTTGACGTATTTTTAGTTATTTTTTACATACATAATTTTAAATATATGTATTTTCCAAGATATTTGATTTTTAAATAATAATAATAACAATTTATTTTTATTTTTTTGGAAAATAGTGTATTTTTTTTCAAATCACTAAATTAAATTGAATTTTATTGAGGTTTGTAAAAGTAATAAAATTTAAATTAATGTTTTTCTACTCTTTCTTTTTTTTCATAGTCAATAAATATCATTTTTGAAAAGATAAAAAATTCATATCTTTCTTCTCAATTTTCACACTTTTTCTAGGTTTTTGGCTTAAATAGTGGATTTATATGGATCAAAACTTCATTTTTGGGTCAAACGGTCCAAAACACAATTGTCCCACAAAAAAATAAAGTGATAATCATTGGTTTTATTTTTTAAGTAAACAAGCTTAGAAACGCGTGGAAAATGAGGTACTGTGGTCTTTCTTTACTTACACTATTGCATATTATTGTATTAAATATCTATACATGTTTGTGTTGAATCCTAGTACTATATCATAGAAAACATCTATATTTATGAAGAGAATTTTGAAAATTATGATATATATTTTTTAATTTATTTTTTCTAAGATGGTGCATTTGTCGTGGGCATATGATATTCAAAGCTGAGGGGTGTGATTCTTGTGAACGCATATTAAATTTGAGTAAAATGGTGCACTAGTTGTTTATATCACTAAGAGCGGACCTCTCCTGCTCTATTTAACAACAATCTTCATCGTCTTCTTAGCAATTTTGTACTTACTTTGTGACCTTGGCTTTCTCTGCTCCACCCTCCACCCTCCATAGCCACCACC
>VvCYP702A2  (1500 bp)
TTGTAGGTTGATTTGAGCTTAAAGCGCTTGAAATTTTTGGATAGACTTATGTTAGGCTTTAGGTTAGCAAGTCAAAAACTTATGTTGGACTTTATGTATATCAATAGAATAATGAATGATATGAATTATTGCGAGAATATGGTCATATGGTTGGAATGCTACAATGGTTTTCTACCATAAATTAAGATGAATATTTCACTCTAGGAATAAGTATGTGAATTTTAATTACTGTAATTTTCTTAGCATTAAAGTGCAAGAGAATACACAAAAAAATCTTTATATATGGTCAACATCCTCTAGAAAAGCCAAATTAGACCAAAGCCACACCATTTTTTCTCCTTTTAATTATGATTGACATTAATGGCCAATTTACTTGCGAAGTTCCTGCCTCCTCCACCATGCACCATGCCACAAAGAAATCCACAAAGAAAGCAAAATAAAAGATTATGCTATAATTTGGAAATTGTTTTAAAAAACAACTTTAAAAATTATTTTATGCTGTTTTGTAAAATAAAAATTTGTTTAGTAATTTGAAATATTTTTAATATATTTTTTTTTTATGTTTTTAAAATAAAATTTATATATAATGTTTTATTTTTAATCATTCTCCATATTTATATAATTATTGATTAGAACAAATTTTAAAAAATAAGTGAAAATAATTAAAATATATTATTTAAAAACACTCTATTTTTTATTTTAAAAATAAAAAATCATTTTCTATCTTCTAATTGATAAACATGTTTTCCTCCTTTTTTAGGAGAGCGAAAACTATTCTAAGAAATAATTTCCAATGGACCTTAAATTTTTCATGTGATGATCAATATCAGGAAGACACATTCTCAATAATGATTTCTTTAAGCTTAATAATGATTAATTTCTTTATAATTTATTGAAATGATTTTATAATTTGAAAAAGACTTTAATTTGTAAAATAGAAAAATATCTCTCCTGAACTTTCAAAAAATTATGATGGAGTAAATTGAAAAACAAAAAATAATTCCAAACAAGCCTTTAGAAAATTTGTTTTGAGTGACTTATCGATGGCGGTATTTATTTTTTTAGTTTCTTTTATTCAATTAAAAGTAATTTATTAAAATAAATCAATATAATTAAAATGAACTTATTATTAATAGATTTAATTTAATTATATTGAATGATATCAACATGAATTTTAGCTGATGAATTTTTTTATTTAACAAAAAAACAACCGCTATCTTAGTCTAAATTGGTGGCTCTGCTTGATAGCCTCGAGATTTTAGTGATGTTGAGTCTCACCTTTCTTTTTCTGTGACAGTAAGAGCATTCATTTATTCAAAGTCGTGGTGAGTGGCGGTCCTCTCCTTGCGCTTTGGCTGATAATAAATAATATTTGAATCATTCGGTAGAGAAATGCGCCTTCTCAGTGCGTCGGTGACAATTACAGGCACCCATCCTTTTTTCCTATATAAACTTAATTTTTTACGTACTTTCTATTCCACTTATAACTTAATTAAGATC
>VvCYP707A1b  (1500 bp)
GCCCGAATGGGACATGACATGATGGCCATCCGATCTAGAAAGTCGAAGATCTTAGCGGTCTTCAACGTGTGAGCTGGATTGCACCGCCGATTCACTGGGTCCCACCCCCGCCCTGCCCCTCCCTTTTCACATTCAACCGCCCTCACCTTATTCCACGCTCTCAACTTTTAACCTTTCACGGTTACAAATTACTCTATTTTTCCATTTATTTTTATAATAATAATAATAATAATAATATTCTAAAAATGGTTCAAGATTATAGATATCATTCTATTTTTGAAAAATATATAAATCCTTTGAACTCTACAGGCCCTTCTACATATTTAACATAAATGGAAATATTTATTTTTTTAAAAATAAAGTCGGAAAAAATAGATATAAATGATGCAATCTAGGTATTGTTTGTGTTTTTTTTTTACTTAATTATAAATAAATCTTAAAATTAAATAGTATTTAATACAGTTAAATATTAAATTATTTATTTTTTAATATTTTATTTTATTAAATATTAAGAAGTAAAAAAATCAATAAATTATTTTTAGTATTAAAAAAAGTCAAATCTTTTAATTTTTTTATTCAATAAAAAAATTTTAAGAAATAAATTATAAGTTGATAAGAAGTTAAAAAAGAAAGTTATAAAATTTGAAAATAAATGTTAAAATAATAAACACCGCCCAACATAAAAGGCTTGAAGGGTGTGTAAAGCACGAGGGGTTTATTTTGTTGCCATTGAAAATCCAACAAAGATGGGAAATGTGAAGGTCTTATTGCTTTCCAATCGGATGAAGATAGTGATAGGCTCTAAATCTAAGGTTATCGTGGAAAGAAAATATGAATATGTGAGGACAGAGTTTTCCATATTAGGATTTTAATCCATGCTCATATACAACTCCTATACAATTAAACATGATGTGAATGGTATCAATAAATTGACTATTTTTTCTTTAAAAAAAAAATAAAATTAAATGTAAATAATTTTAATTTTTTTTAAAATTATTTATTTATTTTATACTTTGATACCCTCATCCGAATCCAATTCATTTTCAACTAGAGGATGGTACATAAAAATGAGAGTACAACTTGTTCTTATCTCTTCAACCCATATGTAGGTCTTAGACTCTTAGTCTTATACATACACATATTTGGATTGCCCATGAAAAAGGTAGAAATTGGAGGAAGAATTTTTCTCCAAAAGGAATGGAGTTGGGGGTTGAATTTTGGAAAATAAAGGCCTTGTGATTTTGACCCTTTTTATGACATTACATAAAATCCACCAAATATTCAAGTATTTCAATACGTATATATAATGAAAAAGGGAAAAAGAATCAACATATATATCTGATGAACATTGAATTTGCCCGCGTACTGTTTGGAGAAGAGTGGATCAAATTTAAAATCGGCTTGTCTTATCCCAATTCACTGTTCTTGGCTCTATATAAACCCCCTACTCTTACCAATTTCCTCTCATTGACTTGTTTCCCACAACCAGAATCTTTCCTG
>VvCYP707A1c  (1500 bp)
TCACTCTGCAGGTGACAAGATGTGGGCCATGGCTGCTTGTTGTGATTGCGTGTAAGACTCACTTTACTTTAATTGACCACCCAGACGATTTATATCCGGATGGCTCATGCTGATTATCCGGATGTGTTGTGGGGACTATCCGGATGTCTACGCTACTTTAATTGACCATCCAGACGATTTATATCCGGATGGTTCATGCTGATTATCCGGATGTGTTGTGGGGACTATCCGGATGTCTACGCTCTGCCAGCGTCGTTTGCTCTTCCTTGGATAGGAGAAGCTGAAACGTCGTTTGCCTTTCCTTGAGACGGTCCGGATAGGATAACTGCACCATGCATATCCTTAGGGGAATCTGGATGATGATGGTTCGGTTGATAACACGTGCCACGCGTCACCATGAGCTGCGTGCCACGTGTTTCCCAGGGGGAGAGGTCCCTACAGGGTTCATAGGTGGAGGGGGCACTTGGTTTAAGGAGGGCGCCACACCCACGTGACAGTCACTACCACTCGTGTGTTTCATGGCTAGATTCTCCACTATTCCAAGCCCAGTAACTTAGGGTATGGCCACGAGTCACAAAAATTGCAAGGTAAATGCTTTATTAGATCACATGCATAGGGTCTATTTCCTGAAACAAAGGGCCGGGGAGATTGGATGGGATGCTTAGGACTTGAGGAGCAGAGTGAGAGAGTGAGAGAGTGAGAGAGTGACAGACGGATGCCAAAAATAGAAAATAAAAATAAAAATAAAACTAAAAATGATAAAAACAGACCTCGGAAAACAAGGCGGGGGGCGTGGGCCACACATGGTGCTGAAAAGGGAGAGTCACGTTGGCAGGTAGTCGCCCCCAATGCTTACACCTGTGAGGTGCAATTCCCGTTGGCGAGCAGTAGCGCGCATATATACTGTAGCCACTGGTCACGTGTTGATGGATAGGGTATGGTGAAGTTGTGGGCTGGTGCGGGTCGGGCCAAAACGTGTTGGGTTGACGAGGAGTTTGAGGGAATCACGGGGCAGGGTCTGTCTTTCTCTTTCACATATAATTCCAGTTTCCAAATTAACCCACACGCTGTAGAGTAGAGCGTGGTGGTCATACCCACACTGTGTTACATGGTAGAAATGGTAAGAAACACATAAAATAGTCATGCATGTAGTAGAGAGCACGCACCACGTTAGGGGAGTGAGGAGTGAACACCTGGTTCGCATACAACACAGACGAAAGGAGCGTGTCCAATGTGTATACAAGGGAAGATTAAAGAGTAATGGTGGAAGAGTGAGGTGGCCGTGGGGGATTACGGGGTTAGGGTTAAACCACTCACACTGAAGCAAGCTCATGACGTCTGTCTCAAGCTCGAAATCCCAACCCACACCTTCTCCCCCATCTCTCTCTCTATATATATATAAACACAAACACACTCCACCATTTCGCCTTCACCAGTCATCACAAGTCCCTACTCTTTCTAACAAGTCTCTGCCAACTCTCTCTTATTCTGTCTGCAACC
>VvCYP707A1e  (1500 bp)
GTAAAAGTAAGGTCCCCCCAAGGTCAGGAAACTTCCACGTACGCCCTAGGTTCTCCGTACAGAACGACAATGGGTGGTCCATCAGAATCTGAGATGACCATAGATTGATGAGGCCTCATCCTATCAGGAACATTTTTAAGATCCTATTCAACATGCGAGCTGGATGCCACCTCCAGTCTCCAGCCCCACCTAGATTCCTCATTTTCTTCTTTTACTTTCTAACCCTCTTTTTATTTAACTCTCTAACTCCACTCCACAATTTTATTAAAGACTAAAATCCAAATTTATCTCTTCTTTTTCTTTTAAACCCCACCCTTTGTTGTCAAGTACATGTAATAATTGTTTTGTGTGGGTGGTTTATTTTTTCCTTTACCTCTCCAAATTCGGTGGAGTTGGAGGTCAATGAAGTCAGGCTCATGGGTCCAACCGTCCAAGCCCGAGTTGGAGGAGATCTTTCTTTCTTCTTCTACCGAGTGAAAATGAAGAGGATCGTCACTTCTAGAGTATAATCTGTCGTGTTAAGTGTATTGTCCCCTTTTATAGTAGATGGCCAAGTTCTAGAAATGGCTTAAAGATACTGGAAGCATTTGATCCCATGTGATTTGAGTCAGGTTGCATCTTATCCATCCAATTTATTCTCACGTCTCTTGTTCCGTGAAATTAAATTAGTAGAGGGTTTCAAAGTCAATGGAAATGTCTGGTTGATAGTTGATTCTTGGATTTAAAAAAAGAGGACGGTGGTATTGTTTGATTATGTGTCCTAACTTGTACCTACCAAAAAGGTTGATAATCACTTCCGTTCCTTTCCTTAACTCCTAAATGCGAGAGATGTGTCCCTGTCTTCAAGTTATGTCCATGGATCCTCTCCTCCAGTTGATTTCAACTCCACCATCTACATTAACCATTTTTCAACCTGCTATTTTTTTACATAATTTCCCTTCCCTACATTTGTAGTGAAGTCTAGGAGCATCTAGAGGCAAACGCTGCTATCAACTCTTTTTCTTCTAACAAGTACTTCAAAGAAACAAAATCACCTGTTTGGTAATTTTTATTTTTAGAATGTAGATACTTAGGATTTTCGTGGAAGGAGTGATTCAGCAAATTGTTGACCACAAGTATCTCCAGGTTTCCCCTAATGCTTAATTAGCACCCACTGGCTCATACTGATGGCTGCGATAGCTGCTTAAGGCATAACAAGAGAGCAAAGTTGACTAATCATATTTGGCTACCCGCAAAAGCAAATGTAAAATTGTAAACAACTGTCATCCAATATTTAATCATGGAAGGTGATTAAAAAAAAAAATGTATAATCTAGCATTGTTAAATTAGTACCCTAAGAGTCTAAGACGTTGTCCTGGAAATTTTTTTTAATAGTTTGTCTCTTTCCAGTCCCACTCTCCCTATAAATAACGGCATCTCCCTCCCCCACTGCTAACATCACCACCTCACATATCTGCATTTTACTACAAACACACAATCAACCTCAGTGCTCAAAGAGAA
>VvCYP708A1a (1500 bp)
CAACCAAATATGAATACCCTGATTTCATATATACTGGAATAGTTAACAGGGTGAATACCCTAACTACATATGTACTGGAATATTTAATAGGGTGAATACCCTAACTACATATGTACTGGAATATTTAACAGGGTGAATACCCTAACTACATATGTACTGAAATATTTAACAAGGTGAATACCCTAATTTATATATACTGGAATCTCCTGATTAAAAACAATGAGTAAAAAAAATAATAGCGGAAGCATGCCTGAATCCATTGAAGGAGAAACCTTATAGGAAAAAAAAAAACCCTTTGAGATGGTCTTCCAATTCTAGCCACTAGATTCTGTGTCAATTTCTCTCTGAGAGGATTTTCAGAAATTGGAATGCGTAGTCGTAGAATGGGGACCATAACCCTATTTATAAACCGCTAGGGCAGTTTTAATTTTATCACAATTATATTTCTGCCCCTCATAGAAATAATAATTGTCTAATGGTATCTACACAATAATCTCATGACAATTATACCCTTAAGCCAATTAATCAATTATTAATTAGATCACTATATTTAGGCTTAATTAAATGATAGCACACACATTTTAATTATTTACATGTGTGGCCCAAATTATAGATTAATTACAAAAATTAATNNNNNNNNNNNNNNNNNNNNNNNNNNNNNNNNNNNNNNNNNNNNNNNNNNNNNNNNNNNNNNNNNNNNNNNNNNNNNNNNNNNNNNNNNNNNNNNNNNNNTAACTACATATGTACTGGAATATTTAATAGGGTGAATACCCTAACTACATAGTTACTGGAATATTTAACAGGGTGAATACCCTAACTACATATGTACTGAAATATTTAACAAGGTGAATACCCTAATTTATATATACTGGAATCTCCTGATTAAAAACAATGAGTAAAAAAAATAATAGCGGAAGCATGCCTGAATCCATTGAAGGAGAAACCTTATAGGAAAAAAAAAAACCCTTTGAGATGGTCTTCCAATTCTAGCCACTAGATTCTGTGTCAATTTCTCTCTGAGAGGATTTTCAGAAATTGGAATGCGTAGTCGTAGAATGGGGACCATAACCCTATTTATAAACCGCTAGGGCAGTTTTAATTTTATCACAATTATATTTCTGCCCCTCATAGAAATAATAATTGTCTAATGGTATCTACACAATAATCTCATGACAATTATACCCTTAAGCCAATTAATCAATTATTAATTAGATCACTATATTTAGGCTTAATTAAATGATAGCACACACATTTTAATTATTTACATGTGTGGCCCAAATTATAGATTAATTACAAAAATTAATCTAACATCATGTAGTAGCTACGCCAGTTTTGATGTGAAAGAAGAATCTGCTAACGTAAGTGACCCATTAATAGATTTTCTTATATCAAAACCGGCCTTCTCAATGGGCAAATTTCATCCAGTCCAATACTCGAACACATTGATCCTGCATTTAATTATATTTCTGATAACTATGAGAAATTTTTGTTTCCGGACAG
>VvCYP708A2  (1500 bp)
AGAAGTTGAATTAGGAGACTTATATGTGTAAATAATAAGTACAATAAAAGAAAAGCACATATGATCGCAGCCTCTAAATTTAGAATCAAGGCTACTATAAAACAAAAGAGACTTTAAAATTGGTATGTCTTCCTTATTAAAGTTAATTCACACAACAAAATATCCACTCAAAGTATTTAAATTGATCACGGTATAAAAAAGACTATGACACTGAAATTTGTAAAATGAAAATTTTTAACACAAATCTTACCTCATGCCCCATGAACTTTTAATCTTGGAAGCTCAGTTTCCAGATTTATCAAATAATTAAGTTGTGACTTTAGTGCAACACTTCAAATAAATATTGGTGACACAGAGAAAACAAAATTGGTATCACCTGACTCTGAAATGATGGCTTCTGGATATATATATATATCCAATGAAAGTATTTAAATTGATCACTGTATAAAAAAGACTAAGACACTGAAATCTATCAAATGGAAATTATAACACAAATCTTACCTCATGCCCATGAACTTTTGATGCTAGAAGCTCAGCTTCCAGTGTCTTATCAAATAATTAAGTTGTAACTTTAGTGCAACACTTCAAATAAAATATTGGTGGCGTAGAGAAAACAAAATTGGTATTGCCTGACTCTAAAAATGATGGCTTTTGATTAACTCCTTCATATATATATTCAATGAAAATATTTAAATTGATCACTGTATAAAAAAGACTATGACCTGTAAAATGGACAATTTTAACACAAATCATACCTCATGCCCAAGAACTTTTGATGCTGGAAGCTTAGCTTCCAGTGTCTTATCAAATGATTAAGTTGTGACTTCAGTGCAACACTTCAAGTAAATATTGGTGGCGTAGAGAAAACAAAATTGGTATCACTTGACTCTAAAAATGATGGTTTTTGGTTAACTCCTTTATACATACATACATACATACATACATATATATATATATATATATATATATATATATATATATGTCCGATGAATGTATTTAAATTGATCATTGTATAAAAAAGACTACGACACTGAAATCTATAAGATGAAAAATTTTAACACAAATCTTACCTCATGCTCATGAACTTTTGATGTTGGAAGCTCAGCTTCCAGTGTCTTATCAAATAATCAAGTTGTGACTTTAGTGCAACACTTCAAATAAATATTGGTGGCGTAGTGAAAACAAAATTGGTATTACCTGACTATATATATATTTAATGAAAGTATTTAAATTGATCACTATATAAAAAAGACTACAACACTGAAATCTGTAAAATGGAAAATTTTAACACAAATCTTACCACATGCCCATGAACTGTTGATGCTGAAAGCTCAACCTCCGGTGTCTTTAGTGCAACACTTCAAATAAATATTGGTGGGGTAGAGAAAACAAAATTGGTATCACCTCACTGAAAATGATGGCTTTTGGTAAACTCCTTTATACATGTATACCTGAACCAGACCAGCTATTGCTCATAGAAGAGTCTTCCTAGATCCCAAA
>VvCYP716A1a  (1500 bp)
TTCTTATCCCCGTCCTATTTAAAAAATTAAACGGGGCAAGGCGGGTATGATAAATTCTCATACTCACCCGTCCCGCCCATTTAACTTTTTTTTTTAAATTACTTTTAAAATTTTTAATTACATTAAAATAAATATATTTTATAAATAATTAAATTATTATATTTTTTATAACTTATTTTATTATTATCTATATATTAAAAATAGTAAAATAAAAATTAAATTAAATTAAATTTAAAATTAATTTTATATATAATTGGGGCGAGACGGGGCGGGATGGGGCAATACCCGAACCTGCCCCGGGTTTTAAAAAAAAATCTCAAACCCGTTAATTAAAATTGAAACTCGTTCCATTACGGACGGGACGGATACCCGAAAAAACCCGATCCATTGCCATTCCTACTTACTATGAGATTAATATGTAAAAGGGATAAATAAAAAATGTCAATAATATATCTTACCTCATATTTGATTAAACATAAGATATGATAAGTAATAGGATAAGTTATCATATCCCATCAACCAATCAAACATAGGATAGAATATAATATCCCCCTATTATCCTACCTCATATTATATCCTGCCAGCAAAATATTACCTTACCCATTTATTTAAATCCAATTTATTTGTTGATATAAATAATCCAAGATATAAATGATGACCATTAATATCAACAATCCAATCACTTGACCCCACCACGAAATAAATAGAAATGAAACAATCCATACAATTTAGACAGGTAAAAATTACAATATCAAATAAAATTTGTCTATATAACATGTAATTAATGTCCATATTTTTCTCCCATTTTCTCTCTTATTTTTTTGTATAAAAGAAAACGGTAACAAAAGGGATTATTTAACATTTACACATGGCTTTATAATTGAATTTACTTCAAGAAGATAAAGTTTACCCTACCTATATATGACACATGAAACACACATTTGAAACTAATGGTTCATGTGTGAAAAGAATATAAGGTGGTGTTTGTTTTTTGGTTGAATAGAAAAAGCCAAACAGTTAAAATTAACTTTTTGTTATCATTTAATATAATTAAACTAAACTTATTGATAATAAGTTTATTTTAGGTATGTTGAATGATGTCAATATGTTATTTTTAGTTGAATAGAAAAAACCAAAATATTTGATTTTTTCTATTTAACCAAAAAACAAACACCACCTAAGTCTATGTCAAATATTAAAATGATCGTGTAAACACTTAACTCTAATTTTCATGTCACCCCCATTTCTTAGTCCAGTATGGCGGCCTATATGATCCCATACATACATCAGTAATTTTCACTAGTTTTCTAGTAATTTTTCCCTGATTTTCTTGACCGAGAAAATAGAAAATCCATATTCAAACCCCAAGCCAAAGGGGCCCCTATTTCAGCTCACAAATCAAGTGCAGTGCTCATGGATTCGTTCAATACCATCTGATATTTTTTTATATTTAAACCCCATTCCCCCCACCTCCACCTCCACCGTTCACAGACACCCATC
>VvCYP716A2a  (1500 bp)
TTGGCTACAATCTATCATTAAGTACCATGGAGGAAAAGTAAGGAAAAATAATATGGAGAACACAAACATTATGTGTAAAAAGTCTCATACCATTTCCATCGTCTACATCACCAAATAATCCTTTAAGTGCATGATCGCTTCAATGGTCTCGCTTAAGGTCCCGTGTAGGAAACGAGCCATGAAGTTTTGTTGAGGATTGGCAGTCATGTCCATTGGAACCCGTTTCATTATGGGGAAGAGCTCGTTCATGTGGGAAATTGGAAGCTCCATGTTGGTAAATGTGGGGAAACGCTCCAAGAAAACATCTAGCTCTTCCCGACTAGTCACATCAATGAGAGCAACCGACAAAGAATGCACATTAGAAGTAGAGTCATCACCAGATATGGTGACTGTCCCTCCTAGCCTGTGAAAAGGAATAATTTTCACATTCTGTGCTTTAGGAGCAGGTGGAGATAGAGGAATTGGTATCGATAAAGCATTGGTAGCAGCCTGGAAGACGAGCCCTTTTTGCCTTTCCTTTGTTTCTTTGACAAAGACTCGACTTCAATGGCCTCGCTCAACCGTTTCTGTTGCCACTCATGCAGATTGGCAACCATTTCTTCTTATTCTTCAACTTCTTCGATTATAGGTGTCACAATCGGTTCGATAATCTCACACCACTCAGTCTGCTCTACTACTAACGTTTCATCCTACTCGATCACAGTCTCCTGAACCTGAGGCCGGATGACACTCTTCTTCTTTGCTTGCCAGGGGGCAAGATTTGAAGCCATCCAGGAAGTGGAACCAGGGGCCTGGTATAGAGTCCTCTCTTGGTGCTTTTTCTGTCGAGCGTTTAGAGGGGCTTGCCTAGCCTCGACGTTAGCAAGAAGGATAACCTTGTAGAAAGGCAAGTCCTTCGGCACGAAGTGTTTGCCCGACACAAGGGTTGGTGGTGCTAGCCGAGGAAGAAGAAGGATTACAAACGGCTTCACTTGAGCAAGTACGACCCTCAGGTTTTTTTAGGTGAGCAATACACTGTGACTCCATTCAGATTGGTCAATCTCAAACAATTTGTTGAGGTGGACGAACAATGACTTCTCTACCCACTCAACTAAGTGGCCCCTTCTATCCTTGTCTAAACGAACAAAACACATATGAATGGAAGTCACAAGAAAGTGAAAGTAAACAATAGAGAAGTCCTATATGAATTGTGAAAATGTTCAATGCTTGGTATTTTTAGAGAACGTGTGGGCTTGAATGGCCTATTTGGACCCTCAGTTGATCCACTCTGTTCCACTTTGCTACGCTCTCGTTCCACTCCGCTTAGCTCCGGCATTTTGCCTATTTTTCTCCATATGTCTTTTCGCTCAAATATGAGCCACATACTACAACATGCCATCCCCCACTTCTTTATAAAATGCCATCCCACCTAGCCCATTTCTCTTCAAACAAGGTCTCTCTTCTCTTGTTTCTCTTGTTTCTGTACGGTTTTGGGAGAGGCTGTGAGCAATATCATCAACA
>VvCYP716A1b  (1500 bp)
ATTACATCAAAATATTAGTACAAAATGAAATAAATACGAACAATTATAGCAAAAGTCTCATACAAACGGTCTAATCCCTTCATTATTATTACAGACCTCTCATAAAATCTTATAATTGTAGTTTCATTACATATGTTGTGGATCAGACCAAATAGATTTTGGATCATTAAAATTTTATATTTTTGAAAGAATTTTATTAATAATTAAGAATCCATTGAGAAGGTGTGTTTGATTAAATTTAATATTTATTAATTAATTGATTGTGAGTTTGTAAAATTGACTTTTAGAGCGGAAGCTAAGACCCTGTAGTAAAATTTGATTGAAAAAGAAAAAAAAAAAGGAGTGAGGAAAATTTTGTGAATAATTTATAAATTTTTTGTAATGACTTTTAGCATGAAAGGACAGTTAATAACAGTATATGATAAGGCCAATAGATGGGTCTGTCAATCCAATGCTATGATGAAATTAACAGAGTGACCTCAGCTTGATTGACAGCTTTGTTGGACTCACCATGCCGAGTCAAGAGTCATCTGTATTAGTTCTACCCCAATACTCGGTATTTTCCCATATTCTACTAATATAATATACTATTCTTCATTTAAATATTGCCATAAAAACACCCCCAAAATCAATTAAACGTGGGCCTATTTGTTTATGCACTCCAATTGAAGGTGCTTGTGCAACACTTCATTTGATGCCAATGGTAATGTATATTAATCTCATTTCATGAAAAACATTAGAAAAAAAAAAAAAGCTTATGCATATGAAAATTAAACTACTTGATTTTTGTTCGGATTCTTTTGTGGTCAACAAAAAATAAAGTTTTCAGACTTAAATATCCAAAAATTTTAGTTGATTATTTTATTGATAAATTTTTTCATCTTAAATTATGAATAGAATTACGAAAATCATTCTTTTTTACATGATAAAAGTTTGAACCTTTATTTTTTTAGAAAAAATAGAAAAAAATTTCAATAGAAAGGATTTGATTTTTCCAAAAATAAGAATAAATTCTTTTTTTTGTTTTGAGAGAGGGAGAGGAGAAAATGTATTATTTCTCTCATTGAGTCTGGTCGGAGTGTTGACTTGGGCACCAAAACCCAGCTCCAACGAGATGAATTTCTATATGTAGATACTTCTATAGTAAATGTGAATGGAAAATGTTTCTATGAAAGTATGGTACTTTTAGTTTTACCATTTAGTTATCCCTCAAAACCCTTTTTACTTTATAGAAAGTAGCTCGTAGATGCATGGAGTTTGTGGGAGAAATAAAGAAAAAGAGATCCACCACCTCCATCGGTGAATTCACCTCAGTTTTTTTTAATAGGTCAGTTTGCCTTCTTTGACTTGTATTTTTGGTGATGCCATCCCCCACTTCTTTATAAAATGCCATCCCACCTAGCCCATTTCTCTTCAAACTAGGTCTCACTTCTCCTGTTTTCTCTTGTTTCTCTTGTGTCTGTATGGTTTTGGGAGAGGCTGTGAGCAATATCATCAACA
>VvCYP716A1c  (1500 bp)
TAAATTTCAATCAGATCAGATTTTGGAGAAAATAAATTAGAAGTGACATAGTGGTTGATTAAAAATAGGTAGAGAATGTATAAAATATTAAATAAGGCCCCCGTTTTTTGGCCAGATTTAACGGGTTCATAAAAGACATTCTTATACCTCAATTTCGGTGCCAACTTTAAAGTATTGACCCTCACTTGCATGAACCCGTTACCTCGGTCACAATCTGGTGATAATATCAAACATGACTAAGTGGTTTCAACCTTCTTGTTCATTGACTCTATCATGAATTATGGACCCACAGATCACGTTCTCATATCGTTTACGCTGTTATTTAGATGTGGATGACAATCTCTAAGCCACGATTAATCAAACTGATTAGGTTTGGCCAGACCTACAACAATTTTCAATAGGTAATTAGCATTATTTTCCATTGCGATGGGTCAGTTGTTGCAGATTGCCTGCAAAAGAAACCAGAGTGGTTCACAGGTTTGAAAAAGAAAAATTGATTTGATTGGCATATTAGACAGTTTGGTATAGGTGTCATGTTATTCACTGTAGTCGCCCTACCTGTGAGGTCAAACCATGGAAGGCCATTGCCCAAGTGTATAACATCCCTAAATAAAGAAATGTTGTAGTGTGTGAAATCAAGACTATAGACGCGATACCAACGTTGTCACAAGATCAACAGTTGAGGAAAAAAACAAGTTGGTATCATCAACCATATCAAGAGTCTATCTGATTTTGTTGACTTGTAGATTTGAAGTTTTTTTAGGGGAACCTTTGTAACGCCCACCTTATATGCTACTAGTATCTAGCTCCTCTGCCCACCTACGTCTCATACATTTTCAATTTAAGCAATAAATAAATGAATAGAACATTAAGACTAAATTTGATCTGAAATAAAAGAGAAAATCAAATATAATTAAAATTTATACATTTTAAAATTATTTTATCTTTATATAATAGAGGAAAATAAGTGAAATGAGTTTGAAAAAATATATACAAATTATTTATTGATTTTGGATCTATTCCCGTTTTTTCTTTTTCCTTTCACATTTCTTCTCTATTTTTTTTTTCACATTTTCTTTCAAATTTTTTTGGGAACAAACAATCTAAAAAAAAAAAAGCATCTTAAAGAAAATAATATATATATATATGTAGAGAGAGAGAGAGAGAGAGCGAATTATTGGGATGTTTAAAAGAGTGTTCCTTCTCTATTATTTAGTTCAGCATTAAGAAAATTGTGGCCTAGAAAAAGAACAAATAATTTCACTTGTAATTAAATAATGTAAGGTTATTTTTCTAAGTTTCCCTCTACAGAAAGAAATTTGTTAGTCGTGTAGTGGAATAAAATAATAGTAGCTAAACAAGAGGAACATGAATCCAATCTTTAGGGTTATAATGGAAAGGAGAGATTCCTAAATAAAGATGACATAACTTTTTGTGTATGAAATTTTTGTTTGGTGTGCGGGTTTTGCACTGCCAACGAGTGAATGTCAAACTCAAAGA
>VvCYP716A1g  (1500 bp)
TATGAATCAATATTATACCCTATTAATGATAATTCATTTGCTTTTAATAGTTTATTTACTTTTGAACATGCTTGTGAACCTTCCTTGATTTGAGACTTGCTATGTATATGTATATAGACTTAGTTTTTTTTATTCCTTTTTAAACTCATTATTATTATTTGTGAATTAATCTCATTTTTATGAAAGCACTTTAAAATATTGAACCATGTACGCAAACCTTTTCTTCACCATTTATTTAAATTAAAGTTTGTGGTTGAACATTATCTATTAACGTTTGCTTGTTGTGTTGAGATTGTATGACATTAAATTCAACTTGTTACGGAATATATGATTGCTTAGAATACAATGTGATGCTATTACTTGTTATTTAACTTTTATGTTTTTTGGAAGTGCTTGGAATGTAAATCAGATACGTCTTTCTTTATTAAATTGATGAATTGTGTTGATGTGTTTATTTAGTTCATAGTATCTATGAATTAATCAGTTAATCATCATAATTATCTCGACTTACTTAGTAAAGACCTACCTTTTAGGGCTTAGAGGAGTGCTACGGTTCTTCACCGTATCTTCCTAATAAGTAACCTGACTTTGGACCTAATTTGGTTTTCACATGCTTGTCTTTTCTTTCAGGAGTCACATTTAATGTTTTTCTTTCTTATTTTGTTTTCTCCTTTAAAAAATAAAACAAAAGTAAGTGGCAACTCCATTATTTAAAAAAAATTAGTTTTCACAAATAAAAAGCAAGTCTCACTATCGAGTGAGAATGCATGTGAAAATGCGGGATCACACCGTGATTACCGATATTTTCATCCTTACCCTCAAATGGACAAAAGCTTTGGGTAAAAATGGGAAAACAAACCTGAGTGTGTTTGTTCTCGGTTAGTTTATTTGTCATCATTAATGACACAGCTAGGATTTGGTTGAGGCTACAAGATATCTCAGCGCATTAGGTCTTATTAACAGCTTTGAGATTGGCCAGGGCTGTTTTAGAAACGTTAAACACGCAATACGCAGATGATACCACCTTTAATAGGCCAACTTAGCTTCTTCGACTTGTTTTTTTTTTTCTTTTTGTGATGCCATCCCCCACTTCTTTATAAAATGCCATCCCACCTAGCCCATTTCTCTTCAAACAAGGTCTCTCTTCTCTTGTTTTCTCTTGTTTGTTCTCGGTTAGTTTATTTGTCATCATTAATGACACAGCTAGGAGTTGGTTGAGGCTACAAGATATCTCAGCGCATTAGGTCTTATTAACAGCTTTGAGATTGGCCAGGGCTGTTTTAGAAACGTTAAACACGCAATACGCAGATGATACCACCTTTAATAGGCCAACTTAGCTTCTTCGACTTGTTTTTTTTTTTCTTTTTGTGATGCCATCCCCCACTTCTTTATAAAATGCCATCCCACCTAGCCCATTTCTCTTCAAACAAGGTCTCTCTTCTCTTGTTTTCTTTTGTTTCTCTACGGTTTTGGGAGAGGCTGTGGGCAATATCATCAACA
>VvCYP716A1i  (1500 bp)
TTTTGTTGTTGATGAGAGGATATGCTGGAATGTGAGTGTATGCAACCAATTTTCTTTTTCTTTTTATTTCCTTTGGCTTTTTGTGTGTAGATTTGGAGATTCAACTTCTACAAGGGGTAGATTCGTTTGGAAATGGACAATTTTTTGTTGAAAGAAAAAAGAAAAGAATCAGTCTCAAAATGATTCTCTATGTCTTTCTTGTGAAGATTTTGAGTTGAAATTGGATTGTTGTTGGCCTCTTTTGAGTGCGTCAACTTGTTTCTCTCTACCCATTTTCCTCAAAATCTAATGGGCTATCTAGGCATTTTGTAGGAAAATTTTTGGAGTGTTATAATTCTTCATTTTGGAGCTTCTAAGTAACTGCTTCGTTGGAGACTTAAGGTGGGTTTTAGATCGTTTGGTCTATAGCTTGAAGCTCTTCGAAAGATCCTCTATACAAGTACATGGGATTTGTTTGATTCTTGAGAATTTGGTTTTTGGGGTTTATCCATTTGCCCTCACTTTAAAAAAGACATTTTTTCCCTCGGTCAAATGGAGAGCACTTGCCTTTTCGTCCAAAAAAATGACACCGTCTCTAAAAAAATGCATATTACATGTAATTATAAAGGAGGATGAAAGATACATTGTTCAATTTTGAACTCAAATGAGTAATGTGCAAAACACGTTATAGGTTAGGGGTAAAGTGTAATAAACCTTAAAATAAATGAGACATTAAAAGTAATAATGGAACAAATGAAAGAAGGGAAGGGAGAGAAGGTGGTGGCCATCCACCATCATATTGAACAATTAAAAATAAAGATAAAATATTTTTTAATTTTTAAAAAATATTTTAAAACACAAAAAAATAGGTTAAACATTAATATCAATTAATAAATAATTCAAATAAATTATATCTCTAGAAGAATTAAGTCAAAGGTGAAATCTAACAATTATGACTCCAAAGGGCCCAGCACGTTCGGTAGAGAGAATAAAGATGGTGACTGATTTGGGAAATTACAAATATTGTTGAATTTTTTTTTTTTCTTCTTTAAAACCTTGCCGCATGTTGAAAGGCTCCAAGGTACGGAACATTTAATCTTAAAATTCATAAGAAAACAAAAAGGGTCATTTTCATGCATTCAAAGGGTGGCTGGCTGGGGCCTGAAAAACTCCAAAGACGAATCTTGTTGCCTTTTTTTTTAAATCAACATTTCAAAGTGGTAGAAAACCCAAAAGAAGAGAATAGGAGAGGTGGGGTGATTTCTCAAATGCTCCCATCCTCTGAGAAAATAATCCAAAGCTGCTTTTTAGTCACACTGGGACTAGGATTCGATGACTTGCTTAACAAATGGAAAAATGGTAACTAACTCAATTCTGGCCGACTACGCCTCAATAATTGCGTGATGGCCGCTACCGTATAGCTTTGCATTTTCTATATAAACCCCCTCTACTCCTCACCTCCCATGCACCCTCACCCTTCATCGCTGCTTTCTCAATTACCACTGATCAAGAAAAGTAGCT
>VvCYP716A1j  (1500 bp)
AATGAAAAGTACTCATGTGATATGTCATTTTTATACTTAAGCAATGGTATCAATTTTTTTTTATATTATTATTTACTAGAATACCATGTTTTATATTTAAATTTTGTTTCTTTGTACTTTTATCCCACTTAAATACTTTTGAGAGTTTTTCTAAGAATTCTTTTTAATTGAAGTGTTTTCAACATATATATATATATATATATATATTTTAAAATTATCTATTAAGTAAACATCACAAGTAATTTTCATTTTTTCTTAAATATTTTGAAAATTTTATCAAATACTAAATAGGTGTTTGGCAAACCAACTTAATAACTTAAAAAAAAATTCTTCAATCCACATCTTTATTTTATTTTTTTACCCTTATTTGTCTTATTTATCTTCACGATCTCTTTTACTACTTCAAAACCTCTATTATTATTCAATTTTTTTTGCCCAAATTATAATTTATGGGGATAAATATATTAATTTGATGATTTAAAATAAATTTAAAGTTAATTTTATCAAATAACTTTAATACTTAAAATAAGAATTAAATCATAAGTTTTAAGTTAACAACTTAAGTATAATTTAACTTAAAGTCAATTTAAGTTATTAAGTAATAAGTATTATATTTTACTAAATACCCCCATTTTTATTTTTTTTTAGAAAAACTTTTTTCTTCGTGTTTTATTAAAGATTTTTCTAACTTTTTTTAAAGTATTTTTTTTTAAGTTTTATCAAATACCTCATTTTTTAAATATATATATATATTAAACTTATAATTAGTGGGTATTTGGTAAACCAACTTAATAATTTAATTTAAGTTACTAAATAAATTACGTATGTTTGGTAAAATAACTTAATGGTATAACCTAAGGTTAAAAACAATTTTAAGTAATAAGTAAAAATAATTAACTTATTTTTAAGTTCATATATTTATTTTACCTTTTTATCCTCATTTGCCCTAATTACTCCTGGAATCTTTGCTATTTCATGAGCTACACTATTACTCAACCTCCTCTATCCTAATTATAATTTATGATGATAAATATGTCAATTTAATGATGTAAAATAAACTTTAAGTTAATTTTATCAAACAAACTTAATACTTAAAGTAAGAATTAATTAATAAATTTTATGTCAACAACTTAAGTATAATTAAAGTCAACTTAAGTTATTAAGTAATAAATATTAAATTTTACCAAACACCCTTTTAGTTTTTTCTGAAACAACTGTTGGGTAGAGTCTTACTCTTATTTAAGTTTTTTTTTTTTTTTTTCCATCAATGATCTTGATTAGTCATACATATCCACACTTGATATTAAGAGTTGATTTTCCTTTGATGACATGGGAACAACCTTTTTGAGCTTTACTAACTAAAGATAAGCATTAAACGGTTGTTGTGAGACACAGACATTTGGAGCCCTTCCACTTGCCTACATATACCCCAGAAGTTGGCTTTAGGTTTTCCATCTTCAAACTCTCCTTTTGCCCATCTTTTATCATTGAATAACAGAC
>VvCYP716A2b  (1500 bp)
TTCACAACATTTTTACAAAAGAAAATTGACAAAAATAATTTAGAGAAAAGTACGGCATTTGACAAGATTTTTAAAAACATTTTTTAAAATTTGAGAAATCAATTACGGTATATCTTAAATTGAGGAACACTTGATAAGTTATTCTTCTTAATTTTTAAAGAAAACACTTCAATTAAAATAATTTTAAATAAGAGCATTCTCTAATACAATTCAAAAAATCTTCTCATACAAGAATTTTAACTTAAAAATCTTTTTAAATTTTAATATAAATTTCATAATTTAATTTAAAAGTTAAAAAAAATTATGGTTCATGTAGAAGTCATATTTTGCCTTTAATCATAAAAATTTTATAGTAAATTATAAAAATTATTCACATACTTTTACTTATGTTTTAAATGAATTTAATATCTAAATGGCAATCATAAGGATATGTTTGGTAATTGTTTTTTAAAACAGTTTTTGAAAATTATTTTATGATGTTTTATAGAAGAAAATTTTGTTTGGAAATCTAAAATATTGTTAACTTATTTTTAATATTTTTAAATATGTTTTAAAAATAATTTTTATAATTAGTGTTTTATTTTTAATCATTCTATATATCTGTATGATTAATTTTTAAAATAAGTAAAAATTAAACAAAATAACTAAAAAATATTATTTATAAACACCATGTTTTTTTGTTTTTAAAACAGAAAATAAAAAATAATTTTTGGTTATTACACGTATTTTCCTAAGTTTTTTGTTTTGGATAATAGAAAAATGTTTTTAAAAATGATTGCCAAATAGGGCTTAAATGACTGCTTCTCGACTAATCAAATTGAGAGTTTAAAAGGTGGAAGGAGAACTCCCTATAAAAATTATATAGACAAATTCAACATAATCTAAATATGTAATATAAAAACTTATGTCAATGTCTATATATTTATTGCCTATATTTGTTCATTCATTTCTAATATAACTTTTTAATAATTTGTTTTTTAAAATTTGAATTGAATTTGCTTTAAAAAAAAAAAGACATTTTAAGACTAAATTGAGTTATAAGATATTAAAAAAAATTACTACAAATTTTAAAATTAAATAATTTTTTAAAAGAGACAAATCCAGAGGTCTTTCTCAAAATGTTTTATTTTTATACATATAAGACTCTATTTCTAAAACAAAAATAAGAAAAGGAGCTTAATTTTTTTCTGTTTCTCCGTACGCTCTTTAACTAATTAACCGGACCAAACCTCAGCCCTAGAGAGATCAAAGCTAAGGTGACTTGTATGTTTGAGGTAGGTGACAGAAGAGGGCTGAGAGGGCAGCTAGAAAGGATGAAAACATAGACAAATACATTCATGGACTTCCTCTTTATTTTATTTTACTTCTATTTATTTATTTATTTAGTTCGTCTTCATTCTAAAGGCTCTCGCTCGCCTATATAAAGCCCCCAAGCTGGCTTGAGGTAATCCATCCTCATCCCTTTTTCTTCTCTTCGTTATGGTATTTTGAGTAGGAAAA
>VvCYP720A1  (1500 bp)
ATCTTAACCACATACATACATATGTGTATATATATATATATATATATATAAAACAATGGATTAGTTTGAAGATATGAATTATAAATTGAAATTACAAGGCAAAATTAAGGAGCATGTGATGGAGGACAGGAGACAAGCTGGCAGAGTGTGAGTTAATGGATGAGGAAGGCTGAAATTCAGGGCCATTCTTTTGGCCTGAAAACTAGGTACCCACCACACCTAGGGTTTCTTCAAGCTCATCCCTGGCATCTTTGACCCCCTTTTAGTGGCTCCATAACCACATGAATCACGCCTCACCTCCCTATTTCTCTCTTCTTCACAACTTTGCCCCTAACCCACCATGTTCCCACTTTTGATTTTCTCATATCTTACAAGGGTAAATCAGTAACAAATACATGTATATCATGATGTCCTTCTAGGGCCAAAAACCCAGTCTAAATCTCGAGCTAACAACTGGTCAAACTACTAGTGTATATCTCCCTCTACCTCCCAACCTCTTATTATAATATTATATATATAAAAAAAAGCGAGTCAAGTATATTCTAATCTTTAATTATACATGCGTTTGTGGTAGTGGGCATCTCTTAAAATTGAAGATGACTCACCTATTTTTATGCTTTTGAAACTTAATTTGGACCATATATAAAAGAGGAGTATTGGAGTATTACCATCGCGGTACTGCACCCATAAGGTGGGAATATTTAGCTCTAGTTTGAACTCAAGTTTCAAGTGGAAAGCCACGTTTGAAGGTTCAACATTAGGTTCTTCTCCTATCTCCTTTTCTTCTGCAACAAAAGAGAGGTATCATACATCCATTTTCTGAATGATGAAATTGATTCTTCTTAAACATTCAAAGATATATATGTGGAGCAGAATCATGAATGTTTGCATTTCTTGAACCCTTTCTATGGAGATTTCAAAAGTATATATGATATGCTCAAAAGTGCCACATTGTTTTGCTGCAGTGACATATGTATTTCCGATCTTCAACAGGTGCAAATCCATGGTGAAAGTTAATGCGTATCATGTGGAAACTGAATCATATATATCATGACTAGTACTATATATTCTCAGGGTACGCGTGTGGTGTCGGGGAAGCTTCATAAAAGTGATTCTCTCCTTTAAAAATAGTATTGTATACAGTTGGACAACTCCTAGAGTATGGTGTCTATCTCCTTAAACAAATGCTCCACTTATTTTTATATATGCTCGTAACAACTTGAAAGTGAAATGGTGACTTACAACTAAATTCAGATCCATGTTTAATATTCAAACATTTAAAGTTTACAAGACGTGGCCCTGCTGAATCCTGGAGATGAGTTAGTCTGGTCAATGAGAAGAAGCCCTTTTGCACTAATCATTTTATCATTTTCTTAATCCATGTTTGTTATGATCAGACTCACAGCTTAATTAGTTGGGTTTATCTCTGTATGGGTATATATATAGAGGGGCTGATGAGTTGTTCTCTTGCAGGTTTCAGCTGATTATCTGAGCTAGAAA
>VvCYP722A1a  (1500 bp)
TTAAAAATAACCAATGACTACTTATAATGCATTTAATGTCCAATAGCTACTCAATTGATCAAATTAAAGCTTGAATGGTCAATGCTAAATTTTATAGAAAAAGTGTTTAACAGTGCAGCTAATGCCCAATATCTACTCAATTGATTGAACCAAAACTCAAATGCATTTATCGATAAGAAAACACTTTTATTGAATTTTCCATCTATTCATTTTTCTCTATGTCAAGCTTTGAATGTGATTAAACATCCCTTATTTGAAAAAAGTTGAGAGTTTAAGCATCAAGTTGACATTGAACTTAAAAAGTGTTATTAGAGTCCAATGGAACCATCCAATCCAAGTATAAAGCTTGAAAGCTTGGATTGGAAGTCTTACATTAATAGAACCCTCACTCGAAAAGGAAATTGAAGAAAATGAATGGAGGTAACATTTGTTGAAACATTATAAAATCATATTTGCATCTCTATTTCCCCCTCTATTTACTTTTATTGCATAGGTTGTTGTTTAATTTAATATTAAAGGAAAGTTTTTCTTTAGAAATATGATCCAATCACATAGAATTTTTTTTAGTTGGATGCTACCATTTTCAACATTTAAAGTAGAAATAGGACAAATTTTCAACTTGTATAATTCATTACATAAAAGTTGATTGCTAAAAACATTAGAATCATAAATCAACTTTAAATTGCCATAAAAAATATTAAAAGAGCATTCGATATCATCTAATCTTGAAATAAAAATCAAATTCCACCTAAAAGATGATATAAGGCAACAACTCTCAAAATAAGAGTAAGGCCAATCTCAAATACAAATTCCACTACTTCTTTAAATTCCATTTGCACATGAGCACTACTCCCAATAGTCAAGTTACTTCTAGAATCATTTGACCTTTATTTGGTGTGTTTTGATGTCTTGAAATTGATGGAGATGAAAAATTGCACGTACACAAGCACACGCCTAGCGAGATTTTTCTCACTCGTCTTATTAGCCCTCATAACATTTTATATATGTGTAGTCTTTCATAGCATTTTTCATATACATAGGACTCACCCATTACAAAACCTTGAACTAACACTAACTAAATTATCATATCAAATATCAGGATCCGTACAATACGTTGAACCAAATTTCAAATTATGATCATAAATAACTAATTGGGTGTTCAGGTAAATAATTAATCCCTTTTCACAAGAATAAAAAATGAATTTATGATGGCATAAAGAAATACAAACAGGAATTAATGATAAAGAAACGTAAGTATAGATGAGCGCTCACAAGTCACAATTGGTGGTGATAGGTGTATGACGTGTGATAATGGGTGGAGCAAGCCAGACCGTCCAATTTAAGAGCACTTTGTTCGAAAGTGGAAACATTACTTCACACTCCTCCAGTCCAAAACACCATCGGTGTCTCCCTTCCTCTATTCATTAATTTAAAAAATAAAATCAAAAAATCAAAATAAATAGATGCAGAAGTAATGCATTGAAAACTTGAGAAGCAAGC
>VvCYP85A1a  (1500 bp)
CTGAAGCAAAAATAAATAAAAATTAATTCAGAAGTTAAAAGTCATCGATCTTTGAATTCCAATTGATGGATGTAATTACCTCATTGGTCTTGTCTTGGATGTCAATAGTCTTGCCATCCCAGTTGTTGATACCTCGCGTCTTTGGCGATCCACGTAGTTGCCAGATGGATGGACACGTGATTTCAACCCATAAAGGTTCTTGATCCAGTCGTTATACCTGCAAGAAGGCATCCGGACAGGGAGTCCGGACACACCCTCCGATGGTTTTGTTAGCCATGGTCAGAGAGAGATATATAAACCAGTTGACCTTTTATTAGGTATCAGGAGATTACCAGGGATCGCCTTCTTCTTTGTCTGAAGGCTTTATATATACAGCTTCAGGGGTACTGTTCCTCTCATTAATGGTAAGGAGATATTTTATGTTGTTATGATGATAATAGGTGTCAGTAGGAGCATTATCATCCTACGAACGGCTGTCAGAAACCATGGTAGGTGATGCGACTGTCAGAGATCGTGGGAAATGATTATGTAGAATGATCGTGGGAAGTGACTTGCTGTCACTTCATCTTGTCTTCTCACTCTGCAGGTGATGGGATGTGGGCCATGCCTGTTTGTTGTGATAGCGTGTAAGACTCGCTTTACTTTAATTGATCATCCGGACGATTATATCCGGATGACACATGCTGATTATCCGGATGTATTGTGGAGCGGATGCATTATGAAGGTTGTCCGGATTTCCATGCTCTGCCAGCGTCGTTTGTTCTTCCTTGAATCAGGAGAAGCTGAAACGTCTTTTGCCTTTCCTTGAGGCGGTCCGGATAGGAGAACTGCCTTGTGTATATCTTTAGAGGAATCCGGATGGTGGTGGTCCGGATGATGATGCGTGTCACGTGTCACCGTGAGATGTGTGCCACGTGTTTCCCAGAGGGAGGGGTCCCTACATTGCCCCCCTTTTTAACTTGCCTATTTTGCCCAAAAAATGGGCGGGGTAAAAAAATAACTGGCTTTTTGAAATTTGAAGAGGTCTCTTCGTCTGAATGGGCCACGTGGCAAGTGGGGGTGCGGAAGCCAAAAAAGGCTTTTACGACGAGCCGCCGACTCTAGGTATTCCCAGGCAGCATGTCGTTTCAATGATAGTTTGTTTGGACGTTTGGCTTTCCGAGGGCCTGTCCCCCTATAAATAGCGCACTGTTGCTTCTTTTTGCATTTTTTCCTACTGCATTCTCTTGAGAGCCTTTCTTCTTCTTGCTTTTGTTGCGTTCTTTGCTTCTCTGAGAAAAAAACTCGAAAGTTTTTTGTACCGGTGATTTTGTGTTGCGACAATTGTTTGCTGTTGGTGGTTTTGCATCGAGACAGCAACCTTTCTTCTTCAGAGCTTTCATTTGGTACGTGTACTATTGCTATTCCTTTTGTTGCGTTTGTTGGTTCTTTGGTCTTGGTTTCTGATTTGTTGGGGCTTTGTTTGGGTAAGTCGCTTACGACTGTTTGTTCTGGCATTTG
>VvCYP85A1b  (1500 bp)
TGATAATTTACCACTGTTTTCTAGAATAAAAACTATTTTTTTATAGAATTTGTTTTGATGAATAATTGATAAAAGAAGAATGTTTAATATCCTCTAAAGAAAAAGTCAAAAAATCAAATATTCATATTCGAATTCATAATAAAATTTCCTTCCTAAAAACGTTAAAGAATTGTTTTTAACAATTTTTTTTTTTTTGAAAAACATCAGCAAATGACCCATCCTTTAAATTGGATACAATTCTTCACTGGCATTGTCTAAACAAAAATATTTCATCATCTTCAAGAGTTGTTTATAGTAAGATAAACTACACCTTACATACATGCTATATTTTAAATGACACATTGATTTTTTTCTCTATGTATAGCAATTTTTCTTTATAAAATTCTTCATTTTTTTCTACATAAAATATCATCCATGGAGACATTCTTTTACAAAAATACTTTGTATACTAAATATGATAATTATTACCTAAAAGGTACAGTAATGTTTTTAAAGGATAAAAATCTTAATGGATTCTATGATATTATTTATATAAAGTAATGATAGTTATTATTATTATTATGCCATAAACTTTATGATTGTTTTATTATTTCATTCTAATAATTTTGTGTTAATTAATTCATGGAGGCACATATTTCTAATAGGACAAAGGTAACATAAAATTCAGAGAACATGTACTTTAGGCTATGTTTGATTTTTTAAAAATTTGTAGAAAAATATAAGGGAATAAATAGGTGAAAATAGAATAAAAGAAAAGGTTAAAAAAAAATTTAAGTCAATAAATTATTTTTATTTATTATTTTAAAATGATTTAAATAATTTTATATAAAGATAAAATAATATAAAAATGTATAAATTTTTAACTAATTTTTATATATATTTTATAATAAAATAAAACAAGATAATTATTTTTCTTAATATTTTTTCTTTTTTTAATATTTTTTTTTAACCCAAAACCTTAAAATAAGTCTTGTGCCTCCCAAAACACTATATATATATATGACAAATCGTCAAATTTAAGTAAAGGATACTATAATATTTTGATTAAGCATACAGATAAACAATGATGAAAACTCCCAGAAACTTGAACAAGTCCAGCATCTGGGGTGGGGGGTTGGCAGCCAATGCAGTGAAGTTCATTTTAGGGGATAACATCTAATACCATGTCTTAGAGAAAAGATTGTTTCAATTAATATGGGTAGATTTTTGTTTTAGGGGGAGATCTGGGAGAATTTTGTATATTTATTACGAGTCTACGAAACCAGGGTGGCGTATAGGGTCCATGGGTGGGGGTGCATGCTTTGGCCTATTTAGCCTCTCTCTGTCTCTCTCTTTGTGTCGCTCTCTCTCCCTCGCACACACTCTCTCTCTTTACAGTGGTAGTCCGGAGGCCCATACATATGCTTCTGAGTTCTGACTAACTACAAGTCTAGGACCTGAGCAAGGCACATCATTCACAGCACTCTCTCTGAAGTGGGTTGAGGTTTCTTGGGAGCATCA
>VvCYP87A2b  (1500 bp)
TTTTTTATCATCTTATGATTTTAACCTAACGTGGCATAAATGTTTATCTAAATGTTTCATTCCTATATTTAATCATAAGCATATTAGGTAAGCAGCTGTCCTTTTATATTTTATTACTTTAATGACGTGGCATAAATATTTATTTATATTTTTCATATATTTAATCATAAGCATCTTATGCTGTCATCCTACCTCGACGCTAAAAACAAAAATAATAATACAAAAATTGAATGCGGTTCTACCCATAACTTGAAAAACTTAAAAAAATAAATAAAATAATCTGCAAAACATGGAAAAGTTAATGATACCGCCGAATGGGTCCCGCCTCTATAAAGAAAAAGGAAATTTGAATGAGGATTTCAAAAACAGCTACTCATTGACTTCCAACTTTTTTTTAGGTTATATATGACGTGGAGTCTTAAATTAAGAAGAAGAGTGTCGGTGAAGTTAGAGAAAATAAAATTAAGGGCCTACATGGGATCCTTTTTAAAAAATAATAATTTTGAGTATTTTTTTCATCATTTTTTATATTTATATAATTATTTTAAAAATAATAAAATAGGTAATAGGATCCAAGCAATTCAACTATATTTGATTTTCAGTCTTTCGATCAACTAATACAATGATGAAAATATCGATAATTATAAATATATCGGTATTTCGATTTTATGGATATATCGGATATATCAAAGATATATCGACGGATATTTTGAAAAAAAATATTGATTGATGTAAAATTGATCAAAATCTAAAAAAATATATATATATAAGAAAAACTTCATAAAAATGTAATTAGAAATATAATATATATTTTAAAGTAGTTTTATTAAAGAATTTTATATATGTATAATATGATTTATTATATTTAATAATAATATCTATGTATCGATCAAAATATGAATTTTATAAGTATATATTTATTATTAAATTACATTAAATATTTTTTCATAATAATATTATGATATTTGATTATTATATGTTTAATTTTAAAATATATATTAATATTAAAATTATGATGTATTTAATTCAATTGTATTAAATAATATAAAATAAATTGTGATATAAGTATAATTTTTTAATATTTAATTAATCTATTAATGATATTAAAAACACTTTGAAGAAAATTATCATGATAATTTGTATGTTTTTTTGTAATCAATTGAAAAGAAAATTGTATTTAATTATAGAATAATTATAATTAATTTATTCTTTAAAAATATTCTTATAATATTTTCTACGATGACAGTAAATATAAACGTTAATATAATTAATAAAGGGCAAACTTGCTATAATGGTTAGGTGAGTTGAACCTTTTCTTTGGGGTTTGAGTCCACGTTGACCATCCGGCATATGGAAAAATGTCGGGAATATATCCGAAAATTTTCATCCATGAGCTAACCAAAGTCAATGAGAACCATCCGCCTTGATGAGCCTCAGCCTCCCTCTTTCCTTCTGTTATAAGTATGCCTGAATCCAATCCAGCTCCTTTTCAAATAAGAG
>VvCYP87A2c  (1500 bp)
TTTGTTTAAAAATTGATTTTGACCTTTTGCTTTAATTAATGATGTTTACTATTAGGATCTCACCAAAGAAGAAGAAGAAGTAGATAATAATAGTAGTAGAAGTGGTTGTTCAATAATAATAGTAGTAGTAGTAGTAGTTATTTAATAATAATAATAGTGAGAATAGTAGTAGTAGATGTAGATGCTTAATAGTAGTAGTTGATAATAGTAGTGGTAGTTGGAAGGTTTATTCACGTTTTTTTCCGTTGATTTTCAGCAAAATATTAATATTTAGCAGATTTTCATTGATTTTTCAGCGATTTTTAAGTCACGTTACCGATTTTTTTAATTTTAAAGCCCTCTAATTTATGAATTTTTGAGATTTATTTCAGGTGGATATGGGATTGCATTTCATCTTGAAATGAAAAATAAATAAATGGTGGTGTGGAACCAACCACCTCAGGTAAGAAAGTGAATGGCCGTCCCATCAAGTCAACTTTAATATTTGCAATAAATTAAATATCTATTTATATTTATAAATTATAATTATGTATTTATATTATAAATATCTCATATAATATATTTTTATATATAAATACATATGATAAATTATATATATATATATATATATATATATATATATATATATATATATATATATATATTATAAATTAATTATAATATGACTATTGTAAATAAGTTAATTTTAATTATCATGTATTTTATATAATAATTAAATATAAAATAAACATAAATTTATCAATAAAGCTATTAACATTTTAAAATAAAAAATACTTATACATGTATCATTATTATTTTTATATAATTTAATACATTCAAATTATTTGTTTTTGTAATATTTTATTTTTATTAAGTATTAAAAACTAAAAAAAAAACTAATATATTACTTTTTCCTTTTAGAAAAATAAAATATTTTGATTTTTATTTAGTAAAAAATTTATAATAAATCATGAAAAATAAAAAAATAAACTATACATTTAAAGTTTGAAAGCAAATTACTTTAAGTAAAAAGTTAAAAAAACAAATACCCTCACTATATAGCTTAAAACTTCTTATTATTATAATAATGGTTGTTGATAGACTTGTAAAATGAAGAGAAAGGAGTCTTCCAACTTCAAAAATATTTTTTAAAAACTAATTTTTTGAAAATTTATCTTTAAATAATATAAATACAAATTTGTTCGCAAAAATAATACAAAATCGATTTTAAGAGTCAGTTTTGAAAATGTAATCAAATAAGTTTTATACTACTATAATGTGTTTTATATATAAAAAAAAAAAGAATAAAAAAAAGAAAGGAAAAATACTTGAGTTTTCTTCTACCTGGCTTAGTGATATTTTAAGCAGAAGGTAGAGAAACAATTAATACTCCTTAGTCCTTGGTAACAATTCCACCAGCCTCCACTCCCATATAAAGTGACACCCACGAGCCACAAAAGCGTATAACCGACCCAAGAGTTATCATCATCCTCATCTTCTCTGAATTTCCCTCTAAACATC
>VvCYP87A2d  (1500 bp)
CAAATGGTCCCAGACTCCCAACCTAGTCAATGCCATCTCATGATTCACTCATTCAAGTGAAATCAAATCCATCAAATCCCCTAATTCCAGATGCTCCGGTTAAAGTACAATATCCCCATTAGTAACATTTTCATATTCATTTCCTTTGACTTCTATCTGATTCTCTGTGTACATATTGTAACGTATTGAAAAAATACACAACAATTTGTTCCTCTATGAAAATTTCCTTGGCTCTTTTATGATATGGGAGCTCACATAAACACTCACGAGATTTTTTTATTATTTTTATTATTTTTTCTCAAATGGCCAATTTACTTGCGTGAGAAGTTCTTGCCTCATCCACCACCATGCAACAAAGAAAGCAAAGGAAAAGATTATGCTATGTTTGGTAACCGTTTTCGAAAATAGTTTTAAAAATTATTTTATAATGTTTTGTAAAATAAAAATTTGTTTAACAATTTAAAATGTTTTTAAATATGTTTTAAAAATAATTTTTATATGTAATGTTTTATTCTTAATCATTTTTCATATTTGTATAATTATTAATTAAAACAACTTTAAGAAAATAAGTAAAAATAACCAAGAGATGTTATTTAAAAATACTCTATTTTTTATTTTTAAGAATAAAAATTGTTTACTATCTTCTAATTAACAAACATGTTTTCCTGTTTATTTTAGGAGAAAAAAAATATTCTTAGAAATAATTTGCAATGGACCTTAAGACACATTCTCAATAATGATTTCTTTATAATTTGTTGAAATAATTTTATGATTTAACAAAGAATTTAATTAAAAAAAATCGAAAAACACCTCTTCTTGTAAAAACTTTCAAAAAATTATGACAATTTACTCTGAAAAACAAAAAATAATTCAAAACAAGTCTTTAGAAAATTTGTTTTGAGTGACTTATCATTGACCTAAAGCTTGGGATGTAAGTGCATGATGTTTATATTTTGGCTTTTTTATTAAGTTAAAAGTAATATATTGATATCAATCAATATAATTAAAGTAAATTTATTATCAATAGGTTCAATTTAGTTATATTGGATGATATCAAAATGTTACTTTTAGCGGATGACTTTTTCTATTCAATAAAAGAAAAAACACCGTCCTAATCTAATTTGGGGTGTGATGCTTGATAGTCTCAAGATTTTAATGGACTTTCCATTCACAATCGAGTCTCACCCAGAATTCAAAGAATTTATTAAAATGGCACTATCTATTACTTAATATGCACGGAGATGGATAAGTGATCTTCAGACAATAAGATGTCATTATCTTCTTCTATGACAGTCAAAACATTCATTTATTCAAAGTCATGGTGAGTAGCAATCCTCTCCTAACACTTCGACTGATAATAAATAACATTTGAATCATTCGGTAGAGAAATGCTCCTACTTCTGTGAGTCAGTGACAATCACAGGTCCCATCCACTTTTCCTATATAAACTTAGTTTTTTACGTACTTTCTATTCCACTTTTAGTAAGCTTAATTAAGATC
>VvCYP88A3a  (1500 bp)
CAATCATTATATTTGATTACCCTTATAATAAAATTCACACAACAATTAACATTTTTTTTTTCCTTATTTTCATTTTATTTCAAAGAAGAATTTTGTTCGAAATAGATGAAATGGTATGTACGAAGTGATTATTGAAGTAGAGAGAGAATTATTGAAAAACAATGACTTAGCTTTTTCATTGATTAAGAATGAATATATATACACAAAAATATGAAACAATCTATCCAAAACATAAAAATATGAAACAATCCTAAAATTAGCCCAAAACACAAAAATAAGAAATTATAATTAATTAGAAGAATTTAAAAATAAAAAGAAAATTTATTGTAATGAATTCCCTTATAATGATAACTTATGGTTAAGAATCAAGATTAGTCCGGTTCTATGATGGGTTGGTCCTTGGCACAATAAAAGTCTCTTCTAAATATATCTCTACACTTTCTGACGTGTCACCTTTCATGTATTTAACTAGATAATGCTAGGCTGATAAAAAACAAATGAGTCGAGGAAATGTTAGAACAAGAGGCGCTGCAAAAATTTTGACGTGGGAAGAAAGTAAGAAAGGACTTGTAAAGGAAATTATAAATAACATAAAAATAAATAAAAATAATAATAAGATCTAGGATGTTCGACTTCCAGATTTTAATTTTCACGAAAATACTATTAAAATAATTTATTAAAAAAAAGGAAAAAAAATTCATGATGCTGGAAGCTGAAAGAGGCACCTGCAGAAGTTTCTGCAGAGGTAAGCAGGAAAGGTGAAGAAGGAATTCAAAGAAAAGAGGAATAATATAGAATAAGATGGGGGCGAAAAGGGGCCAAGAGGGTGAAAACAGAAGTTGAAAAAAATAATGGAGTGCATTGGAAAGCACCCATTGGCATGGGTCTTAATTACTGTCTTTGGCAGCATCCCTCCCTTTTTTTTTTTTTTTATTCATTCTTCTCACGACCACAATAATCTCATTTTTCTGTGCACCGGCCGGCACCCTTTTGGCCTTTGTTTCCATCACCCCCCTTGTTTGCCACCTTAGAAAATTATTTCTTTGTTAAAAAAAGTATCTGCTTTATCATTTTTCTTAACGTTAATTAAGACAAATGATAAGACAACGGGAAGTGTTACAATATGGATGCATAAAAAGATGTCCAATGTTGACATGGGTAGATGGAGTGAAGATAACCCACATCGACTAAACCAATGATTAACCCAAAAAAACCCAAAAAACTAATAATTAAATAGAAAGGTGGTGACATGACATTTCAAATAATGAAGATTAATATAAATTACTTTTTCAGTGGGGTACAAGTGGAGGGTACTTAGGCCCAGAGAGGAGGAGGAGGGTGACAGCAGGTGAGGGTAGCAGTTGTCGCCAAATAGTAGTTAAATATTCCATAACAGGAATAGCTGTCGTGGGGGTGATACTCGTTGAAGAAATTTTTAAGCTCATCAAGGAAGGAAGAGGAGGAGGAGGAGGAGGAGAAGAGTAAGGGGAGTGAGCTTCA
>VvCYP88A3b  (1500 bp)
TTAATTATGATGCAAGACTCATGATTTTTGTATTTTCAATAACAAATTAAATGGAATTTGAAAATAATATAATGAAAATTAACTAGATTATTAAAATTTTACTTTAAAATTTTACTTTTTATAAATATATTAAAGATTTAAGAGTAAATATAGTATATATAATATGTAGTCACATATATAGACTAAGATCATAGTTGCCCAAGTTGACAAGGCTCTATTTTCCATTCGAAGACTAGAAGAAGCAAGTTCAAGCTTTAATAGGTGTTTGGTAAATCAACTTAATAACTAAAAGTGACTTAATAACTTAATTTAAGTCATTAAGCAAATTAAGTATATTTGGTAAAATAATTTAATGATATAACTTAAAGTCAAAATCAACTTTAAGTAATAAAGAAAAATAATTAATTTATTTTTAAATTCATATATTCATTTTACATTTTTATCCTATTTACCCCCCAATTATCTCAACGATTTCTTTTACTATTCCACAACTTCTATTGTTACTCAACCTCTTTTACTTTAATTATAATTTATGAGGATAAATATGTCTTGATGATTTAAAATAAATTTAAAATTAATTTTATCAAACAACCTTTACTTAAAAATAAGAATTAAGTGATGAGTTTTAAGTCAATAAGTTAAGTATAATTTAACTTAAGGTCAAATTAAATTATTAAATAATAATTATTAAGTTTTACCAAACACCCCCTTACCATCAATGGTATGTCGTGGATGTTTGATTGAATTTAAACGACATTTTCATCAATGTATCTAACACCCATAAAATAGATATATGTGTGTGTGTCATTATTACATTACATTTGTTCATTATGCTTTGATTTTTTTACTATATATACATGTATCTAAAATGGTTACTAAAAGATTCTAATAATAATCTAATTAATTAATTTACTAAAATGAATTAAATTTTAATATAAGATATTTCCATTTATAATAATTCATATTTTATTAAATAAACAAAATAATTGTACAATCTACTAATAATATTTGATTTTAAATATATGAGGTATATTTGGTCCATATTAATATTTTTTTCTTAAATTTGTATTCCTTTTATATGGTGGATCATAAAAGTTTTTTTTGTAAGTGTACATACATATGGAAAAAACAGGCAGAAAAGTTAATGAAAATTAGAAAAAATGGGAGTTTAATTGGAATGAACAAATAGCCTACCATTAATACTACACCTCCCTTATAGAGGGTTTTAGATTCCAAATTTGATGTGAATTTCAATTAAATGATATTATCCTTTTTATCTTTTCTATTTTTCTATTTTCATCTCATTAAATAATTCAAAATTATTAAAGAAACACTTTCTGGCTTCTTCTATTGGTATGTTTGTATACAAGGAAATATATCAGAGACATAAAACTTAACAAATACCCTGCTGAATTCTTTGTCCCAGAGTGTTGGGATTAGCCTATATAAAGGGCGTGAAGGTTTTTGTGAGGAGTGTGGAAAAAAAGGGGGAGGTTTCCA
>VvCYP90B1a  (1500 bp)
GCGATGTCTCTTTGTCACCACCTGCCATTAATCAAAGATTTTGAGCATAAAATCTACCCTCAGACCATAATTTTCTTCCTTGACTGACTACTATTCATGTATGATGATTGAGTGCGTGAACACTGATGCCATTATCAATCAATACTTCAATAGTGTGTTGCATTATGGCCGTTGCTGCCTGATTTTTAATGAATATATATATATATATATATATATTTTTTTTTTTTTTTGGGATAATTGGGAAGAAAACAAGTGTGGTTGTTGACCAATGCCCGAGACAACGAAGATGCAATGCACTTCTGAAACATTATTGGCAGTTTGTGATGTCTCTGGACTCTCTACCTGGCGAATTTTTCTGGTTTTTATTTAAATATGTGAAGCAATGGGCAGAGATCTTTTAGGGCTGGGATCTAATTTCCTTACTGAAAATGAGGAATGGTAAACAAATGGTGGTTTAAGAAGAGTGATGGTGGAAATGGAAAGTGGGGGTGGGGGGTTTCCTTGTAGGGAAAAAGCATTGTGAATCATCCATTCTAAATAAGCCTTCATGGATGGTCCATTTTTCGTTCATTTCTTTTTGGCCCATAGTTAATTGTTCATTGCATAACACTTGTGGCCACCGACATCACAATAATGCTGGGGTTGATTATAAGTGGGTCGGCCATTGAATTTAGGGCATTTACATTGCTGAATTACGCATGCATTAGTTTGAGAAGGTACCCAGAAACGAGGGACTCCGTATGGGCTCTGTATGATGTGTTTTGGGAGCAGAGGAGGAGGCAAAGGATATGGCTCTACACGGAGGATGATTTGTGCCTTCGAACCACTTCCCTGTTTTGCGGAGATCTTGGGCGTTTAATTTTGACAATCCATTTGGTACATGAAAATCCAATTATGGTTTGTCGACATCGTGTGGGGAAGAAAAACATAAAAATAAAAACAGAGAAGAAGCATGCAATCGACTCTGATTTTGTAATCTGCTACTTAAAATATCAGAGTTGACCATTTACTCTTTTCTTTTTCTAGAAAAAATGCATGGAATTTGGTATTGGAGCCTGTAGGGGGAGAGCCCCTCTCCATTCTGATTTTCGGGGGCAAAAGCAATGCCTTTGACCTTTGGTCTAAACAATTGGGTTATTTGGAATAGGTATTTTCTCTGCAAATAAGACCAAGCTTTCAAAATTAAAAATACATATGTTTTTTTTGTGGGTAATGAATCGTATTACATTTCCCACAAAACGACAGAAAAAAAACACTATAAAAGAAGGATATTGACTTGATAGCTTTCATTAAGTTTTGGTACCTTGGGTTGCTTAAGCGACGTTTAAAGGTGCAGAAAATGAACCCTCCTTTCTTTTCAAGAGATGGGGAGAACCAGGGAAAGGTAGATGTTTGATTTCGTTTTTGCTTACACCAAGTAACCGGTGTCAGAGGAAGAGAGAATTTTGTATGTCAGAGGGTGAGTGGCTGAGTCGCTGAGTGAGAGAGAGAGTCTCTATC
>VvCYP90C1a  (1500 bp)
ATTCATTCTTAAGGTGCGTGAAAAACACCTTGAAACGACACTCTGTTGGTATTTGGTAAGCTCTGGTACCAGGCTTGTGTCAGCCCCCTCACCCCCACTGACCATGAAAATGCTACTCCCCCAACTCTTTCTTTCACTTCCATTTCCCTTTTCCTCTAGCCCAAATATTAGTTTTTCATCAACAAATATTGCTGCCTACGTAACTCTCAATTCTGGTGCTCCGAGTTGGATGGAAACACCCGGATTTTCAGTCGCTTCCTATTTAATTTATTTTAGTAATTTTAGTTTATAAAAAGCGTTTGTCAATAATTTTAGGGAATATTTTTAAAATTTCTACAACTTAAAATTTTTTATGTTTCAAGTATTAAAAATATTAAAAACATTTCCTAAAATCATTATTAAACGTATTTTTAAAGTGCATTTGACAATAATTATAAGAAATATTTCTAGTATTTTTAATACTGCATTTGACAATAATTATAAGAAGTGTTTATAGTATTTCTAATACTTAAATGATAAAAATTTCTTAAATATTATCGATATTAAAAACACTTCTTAAAATCACTATTAAACATACTCTTAATCATTTGGTGGTGGATAGTTAATATGAAATTTTGATAATTTTATAAAAGCATATAAAATGATTATAATTATCCTAGTATTTATTATCATTTAAAAAAAATTAAAGTAGAGATATCATTTAACAAAAAAGAAAAAAGAAAAAAAAAGCAACCAAAAATTGGGAATAAGTATTAGTTGGAAAATTATCTTACCTTTAATAATCCTTCTATGTTCATAAAAAAAATAAATAAAAAAAAGAAAATAATTGTTAATTATAACTCTTCCTTTTTGTTTTAAGAAAAATGGAGTCACTTCTTCCACAAAATTTTCCTTATTAAGCTTAATTCACTGAAAAGAAATGTAAATTAAGACCTTACAATCTCTCATAAGAAATCCACTCTATATTACCATATATCCTATAAAAAATTTCCAACAAAAAAATATTTTAAATAGAAAATAATTAGAAATAGCATCTAGATAAATTTTTTTACATGATTGGAGATTAAAAGAAAAAAAAAGGATAGAAATGCAATTTTGGCAAAATGGCAGCTGGTCGGGTGGGGCGGGGGTGGGAGAGGGAGAGTAAAAAATCTAAAAAGAGTGAAGACAAAATGAAAGAGGGTGGTGATATCGCTGCACCCCTCAAAGTGGCCTCCCTCATTTATTGAGTTGGAAGCTCTCTAGATTTTCCATATCTCGCAATCAAGATAAACTGATCTCCTTCTCATTCATTTCTCTCCAAAGGACAAACTGCAGTTTCTTCCTTCAATCCACTGCGCCACTGGCTTGCTTTCTTTCTTGCTTTTTTTTTTTTCTGATCTTTTTTCCTCTCCTACTGCACCAGAGAGAGGGGAGTTGGAGTTGGTTGTTGTTTTGAGGAGTTTCGAGTCCAAATAGAGCTGTAGAGATAGGATTTTGGGTGGGAGAAGTGGGTAAAAA
>VvCYP90C1b  (1500 bp)
TGGGGGAGAATGAAAGTAACATGAGAGGTTGGGCTAAGTTGGTGGTGTTGGTGGTGTGGTGGTGGTGTGTGGATTGGGTGATGATTTCGGTGGAAGAGAGCTAGGGACAAAAGTTGAGGGAAGATGATGGAGAATGTGTTGGATTTAATGAGTCTCACATGAATGCACGAGGCCACCAGCTGCACTGCAAACCCACAGAGAGGGAGAGAGAGAGAGGCACAGTGCCATGATACAATCATGGATGTGGGGACATCTATTTGCCTATTTTACAAACATATCATAATAACCCCATAGATGACAATTTTAACATGTTCTTCTCTAGCTGCCCTTTTCACCTACTAAGCACCATGTTATCCCTAATTTGACTCTCATTTAATGGGGTCACATTTTGTGGGTCACTTGTGCCCTTTCTATTAACACTTGGCTGTTAACTCCTTGATATTAATGCAAGTGTTTGAAAGTAAAAAATGTACTTTATAAGAATATTTAAGCTTTATTTGGATCCACTTTTATCAAGTTAAACTTTTATTTTTATTTTATTTTTTTAAGAGATCTATTTTGTTTGGCATTTATACAAATAAAATTTTATAATTATTAAAAAAAAAACTTAAACCCAATTTTTGTTTTCTTTTTTAATTTTCCAAACAATCTTAAAAAATATTTTAACATTCGAATATTATATTTAGTGTTGAAAAGGTTTTAGCTAGACCTTTAATTAATATGCGAAGAAATTAAAAACTAATAATGTTTTTTTCCTTGTAAGATAGGAACATCTTGTTATTTTTGAGTTGTTCATAGGAATAAGAGGTTGTTATTTAAAGTATGGAAAGAATTCTAAGGGTTAAGAAAAAAAAAGTAAAATGAATTTCAATTTTTTTCTTGGTTTATGGTATCAAAAATAACATAAACTACTTTAAAAGTCAAAAAGAGTTCCTAAACTAAAGGAAAATTGTCTCAAGAGGACATACTTAAACTAATGATATATTTCAAAGTGTTTAATTAACAAACTAATTAACCTCAATCAAGACCCATATCATGAAAATGCTCCAAATCAAGGTTAGATTTACATTATCTCGCTTACCTACATCTTCCAAAGACTTAAATCGAATCTCGATCGTATCATTACAGTCAAGCTATATATTTATTAATTATTGTTTCTAAGTTTAACAAAAGTAATTTAGTGATGGTCCAACCCCGCTAAATCCTAACACTAATCTTAAACCCTAAATTTAATAAAGTAGCTAACTAGACCTAACTAAGAAAGTAAAATTCAATTGATGAAATTAGGGTAAATATGATCATAAAGTTTATAAAAGTGTTTCCATTACACAACAAACTAGTTTGCCTTTCATAATCTATCTTTGTTACACGCGTGCACGCACACATACACATGTTCATTTCTCGTAAGCAAAATAATATCGTCACCGCCATTGTCATCACCATGATTAATCATATTTAAGGGAAGTTAGAGTGAACGTGTGTGTGGAAAAATATCAAAAA
>VvCYP90A1  (1500 bp)
GAATTATTTGTTATTAGATATTAACATATATGGTATTGCAAGGTTAAAAAGGTAGTATTACGTACGAAAGGGGAAGGCATATTGTCTTGCATTAATTGGTTAGGGTATCTTGGATTTGCATCATAATCTAATTAACTTAATTATTAAGCTATAAGCATAAGTAGAAAGCTCTATCATGAGGATGATACAATAATTTGGATTCCTACAATCAGGCATGCATCAATGCAGAAAAAAACATCATAATCAAACTTCCCAAGGATTGGTACAAAGTTGAGTGGTGTCCAAATCCCACAAATCATGCACATTCTAATGTGTCTCAGAACAACTAACCTACCTATAATCCTACTAACATAATCCTCCATCATAAACCCTTTTTCCCCAATGGAGGATAATAAGATTCTTCGATTAAAAAACATCCCAACAATTATTATTAAAAGAAGACAGTTTGATTTAACATTAATAATTGGGTTTAAGAATGTCTTTTAAGTGGCCTAAAGTTGAGTGAGGATATGAGCAAGTGATGGGATTCTCTCATTAAAAAAAGGGCCCTTCATTCTAATACTAAAAAATTAAAGGGAAAAAAATGGGAAAGGTGGGTGTTGTGGGGGTTGAACCATCCTGGGCTTCCATTATTCTAAGGGCTGTCAAGTGGGTAGAGGGCTAAATGTCCCTTATGGGGACCATGTGGATGAACATGGGATCATCCCCTTCTCCTCTGTATATATATATATATATATATATACACTTGTATATATAAATAAAAATAAAGAAATATTCGGACCCTATTATTGCCTTGTACTTCTCCTTCTGTTTTAGATTTTATTCAATTTTTTTTATTAGAAGCTTCAATTGCCCATAAAACTTAGTTTTCTGTGATAATATAATTATCATTTGCGTTCATAATCAACCCCCACACCCCTCACCCCCCCTCCCAAAAAGCAAGGGTTTTTGGGATTTCCACGACTCCCATCTCAAAATAACCCGAATGTCCTTTCACACTTGGGCTCAGCTCAAGCGGGGCCACCCCTCTGGTACACCATGATAATGTCATGGCCTTATTTTTCACCCTGGTGGGGCCATTATGGGCTTTCCATCCAATGGCTCTGGTAATGTCATCTGGGTGTGGGATGGAAACACCTGAGCATATTCTCCATATGGTGGAAACTTGAAAATAGGAATAAAATTTGATTTAATCACACCTTATCTTTTTTTTTTCCTTTTATTTTTTCCCAGGAAAATCTAGAGAGAGAGAGAGTGAGTGTGTGTCAGAAATTCAGATACTGAAATATCCGGGCATTAATTTTCTTGACCTGTTCTTTTAGATTCGTAGCAGATACCCCTCGTGTGCTCCTCTTCAGTCCTCCATTAATGCCCTCTTCTTAAAAACACCCCTCCAATCCTCCATTAATGCCCTCTTCTTAAAAACACCCCTCCACACCTCCAAACCTCCAAACCTTTTACCCCTTCCTCTATATCTCAATCTTTAATCTTCTCTCCGCG
>VvCYP90B1b  (1500 bp)
TCCCTTGTCTTGGGTGGTAGCATATTCAAAATGGATAAGAATTATTTCATCATTCCCTAAATACAAGCTTCTACCTAACGGTTTTCCCATTGACAATTTCTACAACCACATGGAAAAAAAATATTGAAAGGCTATTAAGTAAGTTCCTGAGTTCCAATAACATATATCACATCTAAAAAGATAAGTCAACTAAATCTATTATATAGTTCTTAAAAATTCAAATATGAAATACAATTTGCTCAACTTATTCTTCATAAAATTACTTCATACTTATATATAATACAAAAATTTATAAAATATTTTTAGAAAACTTGAATAGTTAAATTTCAACTTTGAATGTTGGTGAATGCCTACAAAGAAGTTACTTTTTCTAGCAAAAAATGTCACAAATCATGTGAGATATCAATGTTGGGGTGGACTCTTATTCATACGTCTCAACCACTAGACGGATGGACCACCATAAATGTAAGATTGTATCAATGTAGCACTTTTCAAGAACACAACCTTGACCAAATTTCTCAAGCATGGAACACAACTAATAAGTCAAAATAATTTCTCACAAAAATTTCTCACGCATAGAACACAACCTATAAGCCAAAAAAATTTATCACAAATGGAACAAAACTTGTAAGCCAAAAAAAATTCTCACGTATGGAACACAACCAAAAAAATTTCTCACAAATGGAACAGAACTTGTAAGTCAAAAAAAAATTCTCATAAATATTTCTCATACATGGAACACAACTTGTAAGCCAAAAAAAAATTTCTTATAAAAAATTTCTCACAAAAACTTATCACGTACGAAACACAACCTATAAGTCAAAAAAAAAAAAAATTTACGCATAAACTCAAAACCAACCTCAATTTTATAGTTCCAAAAATGTCTCTTACAATGGCCCACTGATCGGGTTAGGGTTTGAAGAGAAACTCTAGAGAGAGCCAACCATGGGATAGGAAACAAATGGGAAATTAAAAAAAATAACATAAAAAAATATTATCTTTGCTTATGTGGACAGATGAGACTATTTTTAACAATAGTTTTACCTTAATCCCAATTTTGGTATTAAGTTTAGGGAGAAGGCCATTTTGGCCCAAAACACCATACCTCATATGATCTAAGTTATCTAACACGACTGATATTATATATAATGTATTATTATGATTTATGAATGCCCTCAGTCTCTCTCTCTTCTGCACCTCCAGTACTAGAGAGTAGTGTGTAGGGGCCTAGATCCTAGACTAGCTAGCTTGATTTCATTTCCTATGCCTTCTGATAAAGTAAATTTCACCTCTGTGGAAAAGCCTGCTTGCTTTCTCCTTGTGATAATAAACATATAAGGTATCTACTTCACTCTCTATATATAGGAATTCGAGGCTATCATTTTGTACCCACAGAAAGTTTCATTGCAGTTTTTCCTTCCACTTACTTCCACGGAAAAATTTGGAGAAAATAAATATTTTATATATAAACACACACACACAACATAACCACCTCCGTCC
>VvCYP704A1a  (1500 bp)
ATTAAATATCTTAAATTAATATATTATAAAATTTTATATCTTATTTGTATGTCATATAATTTTATTATTTTAAGATTACTAATTTATTGATAAATAAAATATTCATTTATTGTATTATATTTATCAATTTATGTTTATTGACGTAATACTGGATTTTTAAGTTTAAATATAAATAATTTATTATTAAAATACATATTTTTAATTTCAATAATAAGTTGTAATTTAATAGTTTTTAATTAAATTTGAAAGTAAAAAAAAAAAAATATTAACTGAAGCCTCAGTTGACAACTACCGCTTAAGAGTATACTATTATTTCGATAAAGATAAATTTGTCATAATACAAATAAATTAATATCTTAAAAAATAACAAATTAAATATCTTAAATTAATAAATTATACAATTGTATATTTTATTTATATGTTATATAAATTTATTATTTTAACATTATTAATTTATTAATAAATAGAATATTCATTTATAATATCTTATATTTATCAATTTATGTTTGTTGAAGTAATATTAAATTCTTAAGCTTAAATATGAATAATTTATTACTAAAGCATAGATTTTTAATTTCAATAATAAATTATAATTTAATAATTTTTAATTAAATTTAAAAAAAAATTAACTAAAGCCTCAGTTGAAAAACTAAAGCCTCAATTATCAATTAAGACTTCAGTTAAAAAATAAAGTCTCAATTGATAATTACGACTTTAGTTCAAAAATTAAAGTCTCACTTGATAATAATAATTTCAATTCAAAAATGAAATCTCAATTACCGGCTTTCATTGAAATTTCGAAAAAATATATATTTTTATGACATACTCCTATGTGATACCAAGGAGGTTACTTTGAACGTTAGTTTGATAAAGTGGTTTGATATAATTAATACATGGGTCATTTTGACCCAAAACTCTATGCTTCTACCTGCCTTTATGGGGCAAGGAACTCTATAGCTGTCTAGAAAGGTGAGCCAACCCTCTCGTAGACTTAGTTGGGGACTTGTGATACTTGACAAGACTCAGTACTCATGCATTCAATGTTCGTCCTACTCTCATATATTACATCGTGCTCCGCAGAAACTAATTACGGATATATTTTGGTATTTAGGGTTTATAGACATATAAAAAGAAATTATTAAATAATTTGATAAGATAAAAATTGAATATGAGAATCCCCACAATGTCAAACTTTGATAAGATACCTTTTGATATAGTATAATATTTTTTATAAAAAAAAACATATATAGTTTGAATGCTTAGAAAATAATTTATATCTCTAGCTTTTTTTATTCTTTTTGAGGAGTAGAAGGTAAATTGGAAAAGAAAAACTTCATTCAAATCAATGAATTGCCTGATTATGGATTCAGTCTCATGGATATAATAATATAAGAGCAAAAAGAAGTTCAAGTAACGCACGGCCACTCTTCCAAGATCCAAAAGCAATCCATTTTTTTACCCATGTATATCTTGCAGCTCCTTCTTTCATCAACGTCCAAG
>VvCYP704A1c  (1500 bp)
AAATTATAATTTAGTAGTTTTTAATTAAATTTTAAAATAAAAAAATTAACTAAAGTCTCGGTGGTAATTTAGATTTTAGTTCAAAAATGAAGTCTCAATTGGCAATTGAGGTTTCAGTTAAAAAAATAAATCTCAATTGACAACTGCAGTTTTAATTTAAAAATTGAAACATCAATTGACAATTATAACTTTAGTTCAAAAATGAAGTCTCAGTTACTAATTGAGACTTTCGTTGAAATTTAAAAAAAAAATATATTTTTGTGAAATACTCCTACTATATACAGAAGAGGCTACTTTGAACTTTCATAAAGTGGTTTGATATAATAATTTTTTTAATACATGGGCATTTTGACCCAAAACTATACATTTCTACCTGCCTTTATGGGGCAAGGAACTCTATAGCTGTCTAGAAAGGTGGGCCAACCTTCTCGTAGGCTTAGTTGGGGACTTGTGATACTTGAAAAGACTCACTCATGCATTCAATGTTAGTCCTACTCTCATATATTTGATCTTGTGCTCCACGGAAACTAATTACAGATAAATTTTGGTATTTAGATTTTATAGATATATAAAAAGAAATTATTAAATAATTTTTTTTTATAAAAATATTAGAAAAAACTCAAAAATAATATATATATATATGTAATTATTTTAATAAAAATTGATATATATTGAAGGATATAATACATTTTTATATATTAAAGAATATAAAAGAAATCTTTATATATATAAAAGTATTTCTTATTTAAAAATGTTAATCATTTTATTTATAAATTTATATTTTTTTATTTAATTGTTATAATTAAATTTAACTTATTTATAATAATTTTATTTTAATTAATTTATAATATATATTAATAAATCTTATTTTATTTATAAATTTTATTTTATAAACTAATATATATGAGACATCTTCTCAAACTAAGAACAACACGATTTTATTGGCAGTCGATCCCATATCAATTTCAAAGTTTTAAATGAAATGGAAGCTTTTTATCAACAATATTATCGAAATATCGGTGAATTATGAAAATATCGACGATAAATGAAGAAGAAAAGGGAAATGTATATTTACATGGTGTGGGTTTTAATATATTAAGAGTTCTCTAACCCTAATCTCTGTGGAATAGTAGACTTCAAAGATGCTTAAAAATATAATAACAATATACTTAGAAAAAAATTGAATATAAAAATTAATATGTCTAGAAAAGAATCCCACAAAGTCAAACTTTGATAAGATTCCTTTTGATATAGTATAATATTTTTTTTTAAAAAAAACATATATAGTTTGAATGCTTAGAAAATAATTTATATCTCAAGGTTTTTTTATTCTCTTTGAGGAGTAGAAGGTAAATTGCAAAAGAAAAACTTCATTCAAATCAATGAATTGTCTGATCATGGATTCAGTCTCATGGATATATAATAATATAAGAACAAAAAGAAGTTCAAGTAACACACGGCCACTCTTCCAAGATCCAAAAGCAATCCATTTTTCTACCC
>VvCYP704A1d  (1500 bp)
ATAATTCTTCATTTTGGAGCTTCCAAGTAGCTGCTTCTTTGGAGACTTAAGGTGGGTTTTGGATCCTTTGGTTTGTAGCTTGAAGCTCTTTGAAAGATACTCTGTACAAGTACATGGGGTATGTTTGATTCTTAAGAATTTAGTTTCTAGGGTTTGTTCATTCCATGGAGAAGATGAGCAGAGAAGCCTTTTCCCTGCTTTTCCTGAACAACCATGTCTCCACTTATTCTTCTTCATCCTTTTGCCCTCACTTGAAAAAAAGACATTTTTGCCCTTTCACATGGAGAACAAGTGTCTTTATGTCCAAAAAAAATAACGTAGTCTTTAAAAAAATGCACATTACATGCAATTATAAAGTATGTGAGATACATTACTCGATTTTGAACTTGAGGGGGTAATATACTAAACATGCTATAGATTAGAGGGGTAAAGTATAATAAACCCGATCAATAATTTACAATGGGTGTTTTCGTTATATAAATTCCTAATTAATGATTTGTTTCATTAATTTCTACCAAACATGAATTAGTAACTGTGAAAATAGAAAACACCTAACAATTTACATGCTTCACACTAAAACTTACGTCCAGAGGTGAAAACAAAGAAGAATTCCACTGTAGAAAATTTCTTATAGGAAACTAATCTTATAATTCTCAAAATACTTATTCCTAAAAGAAAAACTCAAAAATATTATTAATTCGTTTTTATGACTCAAATTCATGATTTCCCGTCAAATCAAGTTCTAATGCCATATTGAATTACTAAATTTTCTAAAAATTTAACCTTTCATGATTTGGGTTCAATAGACATATCATGCTCTTTAACAGTAACATCCTTAAAATAGTTTTTGAGAAATTAATATTAATTTTAAAAAATAGTTATACAATGTTTTTTTAGAATAAAAATTTATTTTAAAACTTAAAATGTTTTTAACTTGGTTTTCTATTTTTAATTATTATGTTTTATTTTTAATCATTGTCCATATTACAATTATTTTTTAAAATAATCTTTAGAAAATAAATGAAAACAACCGAAAATAATTAAAATATATTTTCAAAAACATTTTGTCATTGAAATAATTATTAAAAATATATTTTGAAAACCATTAACAATTCGTCCAAAAATTCAAAGAATATTATCACCATTAAACCTATTACAACATGTTATTAAAGTCAGCTTAGATTAATTAATTTATATGACCTAGTTTAATAAGGTAACGCTAATTAACTAAAGCATATTCTTATGTCTTTTTTTTCTTTGATTACAATCAAGTCAACTGTGGCCTGATTATCTACCAAACATTTTCTTCTTTTGAAAGGGATTGCGATAAGGTTTGTTTGATCGATATTTAGCTCAGAACAGTTCTTATTCTTCACCTTTCCTTCACGTTTTCTCCCTCTTCCTTCAGAAATGAAAAATCATTCTTTTTTGTGATTCTTCCATATCAAAAACATCTTATAGTAAGACCCAATCTTCCTCTGTCAATCTCCACCAAAGATC
>VvCYP704A1f  (1500 bp)
TAATATGGGAAGCGTTATCCAATTGAAAGTCACTACCAAGACGAAAGTTCAATATCCTATATTGGTTTGAATGAGTAATGCCTTTAATTAAATAATTTTAGGTCTTTCTTGGTTTCTATACTATACTTGGTCGCACGTAGAGGTGATGAATCAGGATGAGGCTATATGAGCATGGATGCACATCGGAAGAGTTGGTGACCACATCAAGGAGAGGAAGATTAGAAATACAGGGAACGGAAGAGAAAGTGTGAATCAAGAATTGGTATCAATCTGTCAATATCTTGATCATAATAAGAAAAAATATCTACTGTAATTTATATACAAGTCGATCTTTTCACATGAAAAATGATAGGTTGGAGTGCCATGGAAGAAGAGTTGAGAAATTGGTCCAAACACATGCTGAGATTTTGAGGGCATGATGAAAAAGATATATATACTATTTTTTAAAATATGATAATTTTAAAACTATTTCAGATGTATTATTGTTTTTGAAGAGATAATTTTACTTTAAATATCGAGACAACTTTAAAATTCAATTAAATTTGTTTTTTCAAAAAATAACTTTTAATTGGATTCCTCCCTAATTTTACAGAAAATTGAAAATATTTGTTTGAATCATCATATTAAAATGATTGCATTGTTGGGATTGAGCTTTATGGGCCCACCATGGTTAGCGCTTAGCACTTCCGGAGGGAAGACCAGAGGCTTAGGACCGTGACCCCTCAATTACACCATTTGTTTATTTGTCCCTTTTAAAGGAGACGTCCCCAAGAATTGAACTTAGGACCAAACCCTTAAGGTTTACTTAAATATCAATCTTGGTATCATCTGAGATTTTTGTTGGGATTGAGCCTTATGGGCCCACCATGGTTGGCGCTTAGCACTTCCGGAGGAAGGCTAGAGGCCTAGGACCGTGACCCCTCAATCACACCATTTGTTTATTTTGTCTATTTTAAAAGGAGACATTCCCANNNNNNNNNNNNNNNNNNNNNNNNNNNNNNNNNNNNNNNNNNNNNNNNNNNNNNNNNNNNNNNNNNNNNNNNNNNNNNNNNNNNNNNNNNNNNNNNNNNNATGGTACTAAGATTGACATTTGGGTGGATCTTAAGGGTTTGGTCTTAGGTTCAATTCTTAGGGACGCCTCTTTTAAAGGGATAAATAAACAATTGGTGTGATTGAGGGGCCACGGTCCTGGGCCTCTGGCCTTCCCTTCCGAAGTGCTAAGTGCCAACCATGGTGGGCCCATAAGGCTCAATCCCAACATTTATTTTATTCAAATAAACAATTGGTGTGATTGAGGGGCCACGGTCCTGGGCCTCTGGCCTTCCCTTCCGAAGTGCTAAGTGCCAACCATGGTGGGCCCATAAGGCTCAATCCCAACATTTATTTTATTCAAAATTCCACGATTGAACGTTTCCTCTATATAGTACTCTCAGTCCTTCCCCATTTCATCACAAGTCCATTTACCAAATGCATCCTTCTTCTTCATCCACAATGAATTTC
>VvCYP86B1a  (1500 bp)
GTACACATTGTGTAATTATGTAAATGGCAATCTTTATATTATTGGCATCTTATAAAATTTTTGGGTTTCCTCAGAATCATTTGCATCTGCTTTATTGTGCTTGAAATGTTAAATGTTCCATCATGGTGTACAGGGTCAAAAGGACTTTTTTATTTTTTATTTTTTTATTTCTCATGTGATTAAGGCCTTGAAGATTTGATTTTGGAACTGGGCATATAACTTTCAGGTAAACAGCATTTTCATAGGTGAAGCATAATTGGACAGAGATGGTAATGAAATTGGTGGCGTGTGATGGTGGTGTTAATGCTGAGATGCCTTGTCAAGTATGTATGATGACAAAGGAGAGGGTTAGAGGGTTGGTAGTATGAATGTTTTTCATGGGACCTTCCGTCCCCAATAGCAATTTCTCTGTGTTTAAGGTTGACTAACCTAACCCATCAAATAAGGGCCAATTTCGTTTTCTAATAAATTATATCTTTTAGCTTGCTTTTTGTTTTGGTTCTATTACGGAAGTTTCTAAGGGGGAAAAGTTGGATTTTACTGGGAAAGGGGACAAATGTGCACTTCAATTTTAGCCGAGAGAAAATTGATATTTTCTGTGATTATCAGAACTTCTACAAGTGACGATCTTGAATGAGGTGTCTATTGTTGAAGACCTTTCTTGGATCAATTTATTATTAAAAATACAGTTCAGAAAAATCATAGATCTGTCATTTGAAGATGATTATTTATAATAAATCTTCAGAGTAAAATTATAGAGCTAACCTCCACCATTAATCCGATGGCTTGACCAAGAGAGGCTCCGTTTTATACATTGTTAGTTGTAGTAAAAATTTAAAAAATAATTCAACAAAATGTGTTTTGACATGATCAATTTATTATAACCATATTTTAAACGCAACGGCCAATTTCACACATGCCTTGTAAGAAAAAAAGACTAGGAAAACATATGTAAGGTTATAAAGAGTCAAAATAGCGGCTTTCAGTTGCAAAACATCGGACCAAATCGACAATTGGGTGGCCCAAATCATATACAAATAGTTACTTACATCTCAATATAAGTGGTCTGTTGGTCACCACACCACACCTTTACACTTTCTAATATGCTAAGTTGACTCCAGGAAGAATCTAGAAATTGTTGGATCTTAGGTTATCAGCCTGCACCCACTTCCTATCCTCCCAACCCATTTTAGAAACTTCATATTTCAGAGTCAAGCAGACAAGCAAACAAGCCCAACATTCTCATTTGCCCTCTGAACAGAAACCGACAAAAGTGTGAAGAAATATAAGGCCAAAACCCCTAATCCAAGAAAGTTCTTTTAATTTTCAGTTACTCACATAAAAAGTAGCCCTGCGTTCTGCTCACCAAATCAAAACTGCTGAATAAACTCATGCACGCCAAGAAACTCATGCGCCACCCCCTCTTATAACTCATGACCAACACTCCCCACAACTACCTCTACTATGCACTAGACCACTACTCATCGCCTTCATTCCAAC
>VvCYP86C1  (1500 bp)
TTTATTATGTTTGCTTTCAGTTTCTTATTTCGGGTTTTATTATTTAATATTAAGTCTTATTCCTTTGTAACAATATGTCTTAGTCTTATCTCTTTATACATTAAGTCCATTTATTTTATACTTTGATCTTAATGGGTTATATATCAATCTCATTTCTTTATATCGTTATTCAATTATTTTAACTTTATTATATATTTTTAATAACCTAAATTTGAAGTACGGTAGATATCGATTTGATGAGTTAGTTTTTTTCCTTTTCTGGCTGAAATTTAATGCAGTTTTATTCTTTAAGTCATTAGACCCGTAGAATTCACAGCTTTACAAGAAATAGCTTCTAACCAACATTATTTCCCAACTTTGATCTGACTGCTTGATAAATTTGGAGCTCAGACAGAATTGATTCTTTGAAGGAATAATTTGGTTTGCCTATGGCTACAAAGATGTAGATGTAGATGTAGACATCGTAGAGAGATAATAAAGACATCTTACCAGCCTTACACTTATCAAAATTTGAGAAACTTGACTAAATATAGACTCTGCAGTAGGCATTAATATTTTGCATTGTCCCTAGCGTTATCCTTTTCTTGTGACTCTAGTGCATGTTCAACTTGTATGCTTTTAATATGAATATAAATCAAAGATATGACCTAAGCAAAGCAATATATTGACATCCCACACCGATTGAAGAGCCAACTTGAACTTGAATACCTCATATTATTGGAATTTGGTGACCTGAAATCTATTGGGTCTAAACTAAAAAGTTTATATATATATATATATATATATAGATATTTGAAGGTTTGTAATAGTAGCAGAGGGATCAGGCCTGATAGGCCAGATCTCATAACCCCCTGCGGTATGAACCTGCTTGGTTATATTTATGTTATATAGTTTTAGGGTTATAATGATAATGCTTATATTCGAATCACTCACATTTATCTTTTTTTATATTAATATTTTGATATAATAAATTTTTTTTTCATGATTTTTCCTACTTAGGTTTTTTCACGTAACTCTGTGTTCTTATTCTATTTTTTATTATTATTATTATCTACTCTTGTTATTGTATAAGACATATTTTAAATTTTATGTTAAATTTTTTCTTTTTTCATAAAACAGCTTCAATATGATTTAGCTAAATTAAAATTGATCACAACTTCAATATTTCAAAAACCACCATAGATTTTGAGATGTATTTTCAACTATTATAAATTTCAAATTAATTTTACAACTACCATTTTTTATAAATATTTTTTTTTTAAAAAAAAAGTTACAAGTATTAATAGCCACCTAATGACATGCATGCTGGGTCAGCGACTGCAGTTAATACCCACCTAATGAGGGTCAAAAAAGCTGGTGAGGCTCTCTTGCTCCACCATCAATAGGTCAAGTAATATTTATATAATATATTAGCTGAGAGAAAGCATCTCAGGCTTCCATTACTATCCACCTATTCGTTTTCGTTCTTCGTGGTTCTCCAAGAACTGAAAGCATTAGAGA
>VvCYP86A1a  (1500 bp)
ATAAAAAAGTAGAAAAACAAACAACCTAAATTCTAAAACTAAATTACTTTCAGCAAAAAGCCAAAAAAACAAACGCCACCGGAGTGTTGGTTGGTTTAAAGGCAATTCCCATTGTTTCACTCTTGCTTTCTCAAAAGTGGGGTCTAGTGCATGGACCAAGAGGAACAAGGGATCATATTTTCAATGGGGTATAAAATTATTCTTCATTCTTCATATATTGTATCAAAAGAATATGATTTTTCGTTCTTTATTGTATCATTTTGCTCTTATTTTTCATGAAGAACATTAAATCCACACTTTTTTGTTGTTTTTTCTTTTTTCTTTTCTTTTCTTTTAATCCAAACAACCATACAATCATTTGATGAATTTTTGTTTTCCAAACCATGCATAACGAAAACAAGAATTAATTTTCTACCATCTACGAAGTCGTATTTAATTTCATTTGTGAAAACAAAAAATATTTAGGAAGAAAACACCACCGGCTTTCAAGTTCCAACAATATTATTATGCAAAACGACGCCGTATAGGATGGAAAAGTGCTTTAAATAGGGGTGGGTGGCTCACCGAACCCTTAAGTACCGGTCACATGAAGAGCCGATTTTTTTAATAACCAACCGCACGCCGTCCACAAACCGACCTACGACGACGACTCCTCCGATGACTCCGTTGCTGAGCTCTCTCTTTTTATCTTCTTTTTTCTTTTTGGGTCTCAAATTTTCTTCATAAGTCGCCTCAACTAATCTCATTTACTTTCTTCACTCCTTCATTGAATGCTGGAATTTAAAGGAGGAGCTCTTTCCTGCAAAAGTAGGTGAGCATTGTTTAGAGAGAGAGAGAGAGAGAGAGAGAGAGAGAGAGAGAGAGAGAGAGAGAGAGAGAGAGTGGTTTTGGGTTTTGTATGGCTAAATCAAAGTGTATTAAGTTTCTAAGTGATGGTTATAGTCGTAATAAACAGAGATTTCTGTGGTGTATAGTTCGCTTTTACCTAAAGCCTTCAACGACCTCTGATGGCATTTAATGGTAGTGTTAATATAGCTGGTTTGTGAGGATATCACCAGGTATATATATACACAAGGAGAGAGAGAGAAAGTCATGAAAAATTCAACCATGGTCTGGCCCCCCATATTGATTGCTCCTCCTTCCCCTATTCTTCTGTAAATAACTCTTTATATATATGCATCTCTTCTCTCCTCATCCCTCACACCCTTCTTCTCCTTCTCCAGCTTCTTCGTCTTCTGCGTTTTTCCTCCCACGTTCCAGGGAAAAGTTTCAGTTTTTCTCTCTCTTGTCTTTCTCGTGCCAGCACACTGTTGGGCTCGATCTCAACTGTTTGCAGAAGAACATTTCATCTGGGTTTTCTCAGTGGAGCACCCCATTTTGGTTTTGGGTTTGGAAGCTACCCATGCCTTAGAAGGTGTTTCTGGTTTCTGGTTTCTGGTTTCTAGTTTCTAGTTTACCGGCGGTGGAGTGAGTTTAAAACAGGTGGGGTCCGCAGATCAG
>VvCYP86B1b  (1500 bp)
TATTGTCATCTCTAACCACCAATGTGGGCTTGAAGGATGAATCAAACGAGAGTAGGCTCTGATTGATAATCCAAACTAGCTAGTCCAATTTGAATTTTAAAACATTACTAAAAACACTAAAAAATAATTTAATTGTAAAATTGGGGATTTAAGTAATAAAATTAATTAAAATGGCGTGATTAGAGCTTAATAATCTTTGAAGGGAATAGGAATAAAAAAGGCTTTAAATTCCTCATTCAACCACACTTTGTTGTGGCGCATGGGGCCCAAAACCAAGCCCACCAAATGTTCAAATGGATCGGGCTGGGTTGCTTTTCTACAAAAAAAAATAAAAATAAAATAGGTTAAGGAAAAGATGCCACAAACCCCAATTGGTTCACCATTTTAGTCATCAAATTGTTGGTCCGTCTGGTTGGATGTTGGTTCAACTTGTACTCCAACTTGAAGGATGAATCGAACCGTGCTAACTCCGGTCAATGGTTTGAGCCAATCAATTTGGTTCGATTTTTAAAACATTACTTAAATTATTAAAAAAAAACCAAGTTAATTATAAAAAAAAAAAAAAAAAAGGACTTAAAGAACGATTAAAGCTTAATAGTCCTTGAAACTATATGAATTAAAACCCAAAATATGTAACTTTTGAGCTCCATCAATGGTCAATGTTATGATGGAGAAGCCTCCATTCTGCAAAGTGGTTTTAAAATCCGAGCTCATTACACCTAATTAAAACTATTTAAGATTTTAAATGCTTTTGCCTTAAAGGTGTGAAAATAATTAAGATTTTACCTATAACAATCAAGGTACTATCTTTTAATAATAATGTTGATACTATTTATTTTCACTTGAATGTGTACGTTAGATTATAAAGTCTGAATTAGTTTTATTGCACTTCATTTGAAATGTTGGCGGTCAAGGCATTTAGTCAACTCACAGGAGTTGAAAGGGGCAGCACCTTGTGAGAAATTTTTTAATTATGTGATAATTGACGAATTTTGCCCCTATTATATATTTAACCTTTTTATGTTTAGGGTTTTATTCTTTATAGAATATGGTCACAATTGAGAGGATTTTTTTCAAGAGTTTTTACCTTTATAATTCTTTTCATTCTCTTTTATTAGTGGAGTATTAAATATTGGTACACTTCATAAATATAGGGATTGATCGTTTAACCACCACGTTGAAAATCCTTTTTTTTTTTCTTTTTTTTCTGCTTGCATGTGTGTGATTTGGTTAACATAATAAAGTTAAACTAATAAGAGAATAAAACAACTAAATTATTTCTAGAGTTTCTACACTTTTAAGCTTGAAATGAGCCTGAAAAGCATATTCGTGATTAAATTCTTAGCCAGCCAAGATTATCACTTTCTTTCCCTATAAAAAGCATCATCACAAGTATTCTTTTTAATGATGCCCAAAAAGGTTGGTGAAGCCCACTAGCAGGGGCATGAGTTAATAAAATGAGAGGCCATCACTCTTCCATCATCTGATCTCGTAAGAGCA
>VvCYP86A1b  (1500 bp)
CCTAAATTTCTCTTTCTACCCAATCCTTTTTTATACTTTCAAGTTTCAACAATCGTGTTTTTGTTTTTGTCATTTCCAATGTTTTCTGTTCTAAATTTTTATCTTTTTAGCATTTGTTTTTTTTTACAATATTTTAGTTTTTGGAAAATATTAAAAAAAATTATCATACCTGCTTTATCATATAAATAAGATCAAAAATAATAATATTTTATGCATCTTTAAATTATGTAACATTTATATAAAAGAAATAAAATTTAAAGATAAATAAATAATTTATTAACTTTTTTTTTTCTTTATCTTCTTTTTTTCCTTTCATCTTTCACCTCAAAATTTCCGACAACCAAATACTAGGGTAGGAACCTAGGGTTGTCCATTTTCTTATCTTTCCCTCTCATCCTGGCAATAGATTTCTTACAGAGGAACAATGAAGAATTGAGGTTTCTTACCATGGGAATCTTTCACCAGTTTGGAAGAATTGGGGGATCTTACCAAAGGAATCTTTATTTATTATACATAAAAACATAATAATTTGAATCTTTCAGCAGTTTGGAAGAATTGGAGGATCTTACCAAAGGAATCTTTATTTATTATACATAAAAACATAATAATTTAATAAAAAATAAAAATGTTTTCATATTCAAGTCTCTTTAACCAGACACAATTGGAAACGTGACCCATGAAGCCAGTGTCAAAAATTGAAAAATATAAAATAAGAAATAAAAAATAAAAATAAAAAGTTTGATTAGGATGAATATTCTTTTATATATTCTCACTCAAACCCTTCATTTCTTTACCCCAAAGTTACCTGCATGGGATTAGAGCTACTAACCCACACTCAAGAAGGTCAAAGAGGCTTCTTAATCTTGTCCTTGAGAAATAATTTTCTTTTCCAGGTTTAGGGACAAGGCCAATTTCTCATTACGGGTAAACCATTTCTAACCACCACCCTCTCACACGAACTAAGACAAATGGGTCAATAACAATAGTAACAAGAAAAGAAAAGGAGAAATTGCATGCCTGCTCTAGATGGAGTAGGTAGCTTGGTCTACCCATGCGCAAGCAATCAACTGGTGGCTAAGTGCAGATCAAGGACTTTTCTCTTTACAAATTAATATATTTTATGTAAAACTATGAATAATTATTTAAATATTATGATATAGAGTGGAGAGGTATAGGTCATAACCTTAGAATTATTTTCAATTTCTTAGATCAAGGGCACGACACGTTTCAGTTAATACTAGAGAGTACGTATTTCACACCTAATTCATTGATTAGGGTATGAACTTGATTTGGCATGGTTTTCGTGTGCAAACTCCAGCACATTCTCGTCAACCAAACAGCGACCATCTGAGGCAAAAAGTCCCAACTACTACTCCTAAATTTTTCTCAGAATATCCTAATATATATGCAGAGACCGGTGTCCATATGCCAACCCATCTCTATCTTCATTGTTCGGTGTAGGCACAACAGTCTACTCCATTCACTGACTATCGATCCCAC
>VvCYP86A1c  (1500 bp)
AATATATGTTTATATATGGTGAGATGAGATGAATGGAATTATCTTATTTATTTTATCGTTATTACTTGGTCATGATATTTTCATCTTCAATAATAGTAGTTGAATAATTGGTGAACTAATTATATATATATATTATGTTTGTCCACCTACATTACATTCCATCGTACTTTCTAATTTTGTGGGCTGGGGTTGATGCTGTGGGACACAAGAGGTATAATCTCCAGCTAAACTCAGCCTTAAGACTTCGGACCGAATTTAGAAGAAAGCATGCTATATATTAAAATTTAACAATTGAAGTTAAAAGTTCTATGACAAAAAGAAAAAAAGAAAAAGGAAAAAAGGACAACAACAACCATACTGGCTATCCAGGTGAAGAATGTTATGCTCCGTTTAGTATGCCAAACATCTGATAGTAAAATCCGAGTTGTTGAACAAGGTATAAATACATAAGGTTTAAACAAGTGAACCGAATCATTGAATTGCATACTAAAATCTGAGTTGTTGGACGAGGATGTAAATGCGTGATATCAAATAAAATACAAAGCAATTAAACTTGAGTGGATACTTATAGTGCGGTTTTATGCTCCATTGTTATTTTTCAATACAATACCCAAATTGTGGCATGGCCAAACCGTATCTGATATATGCTTACATGTAAATATATATATACATAGAAGTGGTCAAAAACTGATGATGTAGAAACAGAGAAAATTATTGACTGAGTTTGGAGTGAAAAGGATAAAGATGAATTCTCACATTAAGGCATCAGTTATAAATAGTTGGTGGGTGGCTCACCCAACCCTAACCAGTCACATGATGAACTCCATGCATTTTCATTTAACATATTATTATAAAACCACCAGCTACCGAGAAAATGCAAATAATTGAGTGAAAACTCAACTCCACTTCATCTTCCTTAGCATTGCCATCTCTTCTTTCAAAAAAATTTTGGTGGATCTCTGTGTCCTCATTTCCTCAACCAATCTCATTTATTTCTCCTCATTCAATGCCTCCTATTAAAACCCAGCTCCTTTCCCTGAAAAATTAGGTGTGAAGAGAGAGATAGACAGAGGCTTTTGCTGAGTGGGGTTTTACCTTTATATTGTCAACGACCTCCCACTGCATTAATGCTGCTTTCTCGCTCTCTCTTTCTCTTTCTATGTGTGCATGAGGCTTGAGTGTGAGATGGTGAAATTCAAGAAACAGACTGGCCTTAGTAATTGCTTGTCAACGCCGCTTCGCCTATAAATCCCTTCTTCTCCATTTCTACTACTCATACTCTCTCAGTTCTCTTCTTCTTTCTCTTGGTAATGAATTATTCAAAGCTTTGGTTTTCCCAACAATGGCGTCGTGTTGAAGTCCTGAAAAACTAGGTTTAAGCAGTGACCCACCATTGTTGATGAGAAATACCATCTGGGTTTTTTCTACTGGAGTCTTCTAAGGTACGTTTTTGGAGATTCAGGTTTTTTCTGAGGAAAGTGCGGTTTTTTTCTCGGGAAA
>VvCYP94C1a  (1500 bp)
AATATTAGAGGCCACATAGTTGCCTTTTATGGTTTTTTGAGTGTCCTAATTAAAATATTTGGATTGAAAAGATCAACATAATCTCAATATTAAGAAAAGGTAAGTCCAATAGTTTTGAAATTATAAATGTAATTTGAGATGGACCTAACCACATTTTTTGGTATTTAAGATGGGTATGGAAAATAAAGATTATTTTATCCCTTTAGTTAGATATTGTGGAGTAATTATGTCAAAAACACAAAGTAATTCCAACTTTGAAAAACAAATTTGAAAATGGTAAATATATTCATAATTGGATATAAGGTCTTGTTTGCTAATTGTTAAAAACAGTTTTTTTAAAAAAATTTTAAAAAGTAGAACAAAAGCCTTGTTTGCTAACCGTTTTTAATATTTTTAAAAAGTATTTTTATCTCTATACATCTATTTTCAATCTTTATATATGTTTGCATAATTATTTTTTTATTCTGAAAAACAAAAAATTATTCTGAAAACAATTGAAAACAGACCCTAAACATTTTCACTATTTTTCATAAGTATATAAAATAAAAATAAATAAATAAAACAAAAAGAAAGGAAGAAGAAAAATTCATATAACCAAAAATATCTTTCTCACCTAAGCAAAGAAGAATTGTTTTACCACCTTACTAAAAATACTAAATGATAATGAAGGAAAATAATTTTTTTTATAGGAGAATTTTATGAAAGATTTGTTGGCATAATTAAATGTGTATAATTAAATTTAGTCATTTAATATATATATATATATATATAAAAGGAGAGATTTAACTGATAAGGTAAGAAGAAGAAGATATGGGTGCAGGAGGTGCGTAGAAGGATGATTTTGAATGGACAGAGAGGAAGAACCAAATTTGATAAAGAAAGACGAGAACAGCAGATGACATGAGATTGGAGAAAAGTCACCGGGTGGGGTGGAAGTGGGAAAAAGGAAACTAGAAAAGGGGAGATTGATGCAGCGAGATGGTCAGTAGGGCACTAGCATAAGTTGGAGCACGTGGTTTGATTGTCGCATCTTGGAATGAGTCATGACGTGTGAGTATTGTGTGGGCGCCCGCGACTCCCTCCGATATATTTTAGCGCACGTTTTCCTCGTTTCACTCTCTCTCTCTTTGTCTTTCTCATATGCCTCCTGCCCTTAGGTGTTGAAAAGTCCGTATCACTGCTCCACACTCCGCCCCCACTTCCCAACTGAAATTCCCATTTAAGGACGCCTCCCTTCTATCATTTTTCACCCCTTCTGCGTCTCGTTCCTCTCGTTCCTCTCCTTCGTCTATCTCTTTCCTTTCTGGATTTGTTTATTCTTCCATGGAATACTACAGTGAAGCTTCCTCCTGGTTGCACTTTATGTATACTACTTTCTGCTTCTTCTTCTTTGCTTTCACCTTCTTCTTCTCTGTGTTTGCTTTCTTGGTTTTCATCTTGAGGTTGAGGCCCTGTTGTGATTGTGATGTTTGCCGGAGCTACCTGTCGGGTAGCTGGAAG
>VvCYP94D1  (1500 bp)
CCAAATTCCTAATTAGTAAATATTCCTTTTTGTAAAGAATATTGTATAGAATATTTCTAGGTTGATATATTATTGTAATATTAGACTTCCTTATAGAATAAGGAAGGTTGTTGGAAATATCTCTATAAATATTCTAGGTCATGAGGGGAAAAAGTCATGAGATGGAGATGGGCCTATAGAGACTATACGAGGTGGATAGAGATGTGAGGAAGAACGGGAGGTACCTGGTGGAGCGAGAGGGCTCGTAGTAAGGTATGGATACAAGGAGTGGGGAAACATGGGATGTTTCGGGAACCCAATAGTTGTATCTGGTTTTATCCTCTGTAATATTCTCTATTGTATAGTGGAATTATTCTCTCTCATCCGTGGACGTAGGCATGGTTGGCCGAACCACGTTCAAACCTCGTGTACCGTATGTGTGATTGTTTTATCTTTGTGTTCTTGAACTAACATTGTTGGCATCAAAGCTTTCGCTGGCACTACACTGATTGCAGTGGAAATCAAACTCCTCGTTACCCTGAAACAAAGATAAAGACAAAATTCTTTTTCACCAATCACCATCAAATGCCACCCGTATCATACATTTATACCTATTTCATTATGGAAGCTGCAAAAGATGGTGGCTTGAAATTCTTTGGTGAAGCAAAGTAGTTATAATTTAATATTTGATTCACCAGATCAGGAAGAAGACAATTTAAAAATTAATAATAATAATTATTATTATTATTTTACTAAAATAGATTATCTTTTAAATACAATTCCCCATGTGATAACAAAATGGAATCAAAATTCAAAATTTGTCATGCATCCCAACATGGGAAATTATATTTTAGAATTCAACTGGGATTCTATGGAGTGGAGGATATTTAGAGAAGTGGTTACTATTGGTAGGGGCTAAATAAATTTTTTTGGACTTGTGTATATAGAAATCACATTGAATTTGGTCAGAATCCCTTATTTCAAAGGTAAAATTTGGAGCAGTCGACTAAGTATGAGAGGGGCCAAACCATGGAGGGGGCCAACCTAGGTGTTGGCTGTCTTCGAATACATGTGTTCATCAAATTAGAGATGAGAATAAGATGAATTCCCCATCTCGACTACCATTTTCTTATCCTTCTCCTAATAAAAAATAATAAATTGGGGCAAGTGCAATGAGATGGGAAAAGGGAATTACAGCCACATTATTATTATTTTTTTTCTAATTTCAAAACTTTTTTTTTAAAAGCTAATTTTTAAAGTGTTATAAATTGAAAAATAAATAAATTTAAATTATTTATTTATTTATTTATTTTTTGAGGTGGGACGATAATCAAGCCGAAACTCTTTCCAAATAAAATAAAAAATAAAAAATAAAAAATCTCATCCACCATCCTTTGATAAATCTCAAATTTGATTTTATAAATTTAGGTTTATTTTTAAAATTGATGTCCAAAGCATAAAAACCCTCGTTGTTAATCCACCAATCTCATTTTCTTTGCATACGCTGTTTTTCTTCCTCCG
>VvCYP94C1c  (1500 bp)
TGTCACCCAAAAGGCAAACTAACATGAACAACTCAACTTTCATTTATTTTTCCTTTTCCACGGTAAGCTCATGCTTGGGTAAAACTTTTGCTACAGTAATGGCTATGTCAGAGACTTTCGCCATGCATTGCAAAATTAACAACATAGTGCCTAGTGCCATCAATGAATCCCATCTACCTTGATCTGAAGGCAGTGCAACCAAAGATCCCCATCTACCACACTCTTTCCCAACAACTAACCGGAAATGGAATTCAATCAAAACCCAAAACAATATTATAAATTTTTTGTACACGTGGCTGGATGGATAACTCATATAAAGACTAACATATTCCGTGACGTGTGGATTGAGATATGTCTTATAAAGTATAAACGACCCACTTTCAGTCGTTTCTACAGGCGAAACTCGTGCTATTTCAGTGTGGTTTCTTGGTGATTTCACTCAGATGTGGACCATAGCCACCCCCATCATCGCCTGCTATAGCATATATTTTGTATCTCTTTTTATTACATGACCAAATCGCTATACTCAATCCACCCGATAATTGCTTAAATGCCCCCACAGTCTTGCACTTTGTGCAAAATCAATCAAATGAAATTATTTGTGGAATCGAAAGATGCACCATGATTTGAATTGTGTATGACAGACCTGCCTTTTTTAACCTCAGCAGGTGATGCTTAATTATCATCCAAAATGTTTTTTTTTTTTTATCAAAATCATCTTCAAAGGCATAAACAATGTAAAATTTAGAAAAAATATATATATATTGTTCAATTTGTTAAAGAATGATTAAATTATGCCAGTCTTACGATAAGTCGTTCATTTTTTTTCTTTGAAATAACTTGGGTTTGATTTGAAATTGGGAAATGTTTGGAGAATTAATTTTAAATTGAAAAAAAAAAGGAAAAAAAACATCCTAACTCTCTTCAAATTTTTTTTTCCTTTTGAATAAAAAGAATAACATTATCCAAAATTTTAACTTATGTACTGATTTTATTGACTATCACATGTAAAAGTTGGTGACTCACGTACCTTAAAAATTTTAGCTTTTAGGTATTTCAAAATCAATTTCAATTATTGAATTTTATGTGGTCGAATTGAGATATGGTACCTCCTCTCTTGTGTGCGTGGCAAGATGATCCATACGTAACCACCACTGACAATCACGCAGGCAAAAGTAACAATGTTTCCATCCGTTTCCTCTGACAAACAAATAAACTTATCATCCCCATAAATTGAAAGCTTTGTCTAGTCTGTCACCAAAAGCACTCATCAAATAAAAAAAGTCTCTCATTTTCGACTCATATTATTCCCTATAGCTGGGCACTGACTCTCCCGTTCTTCTCCGTCTTCTTCTTCTTCTTTGAAAGTTTCTGCTCCATTATCCTTTGATGGAATACTCTGAAAACCTCTCTTTCTTGCAGTCTCTGCAAGCATCTTTTTGTTTCATCTTCTTCTTCTTCACCATATCCTTCTCTATTTTCTCTTTCTTTCTTCTTTTC
>VvCYP94B1a  (1500 bp)
TTAGTTCAGTCGGTTCGACCATCAGTTCAACTGATTTGACTATCGATTCAATTAGTCTGATTCCAATTCAACCCTTGACCATCTCAATTTGCCGGATCGAATTGAAACCGTGATCGATTGGTGGTTAGATTAGTCGAACCAATTGATTCCATCCGATTTTTAAAACCATGTTTTTTAATATAATAAAATATATTGTTTATTCAAAAGAGATGTGGAAGATAGAGGGAGAATATCTCAACGTACAAGGGTTATTCATTTGAAAATATAAATCTTGAAAGTTGGCTTTCCAGTTTTTTTAAAATGAAATATAACATTTTTTTCAAAAAAAAATTATATAATTTTTTAATTCTTATTTCACATCAAAAATTTTTTGAACAAAAAGTTATGAAGGTAAAATCCTCCGCATAAGGTTATATACGTAATTTTTAATATATAATAATAATAATAATAATAATTTTCAATATTAGTTGATATCATCTTTTTAATAAAATATTTCTAAAATAAAATGGAAAAATGAACGAAATATTTAAGAATAAGTATATTTTAAAATAACTTATATATATTAAATACATATTTTTATTACATTAAAAAAAAGGTTTTGGGAATACCCATTCCTACCATAATGGGTGTTATTTTTGGGATTGATTGTTCGTGTGGGCATTGAAGATTATAAAGGCTTTTCTTTTCCCCTGTACATTTAATCACACTTGCACAAATCTTCTTCTTCTCCATACAAAACTGTGTGCGGCTTTAAATGCGGCGGTGCCAAGCCTCTTTCTCGGACATCCTCCCCACGTTGGCTTAATTGCAAGTGGCCAATAAAAAAATGTTATTGAGGCCTAAATATTCATTGCCATGTTTTGCCGACATAGTTTATTTCTCCCTTTAATAATATTTAAAGCTAACTAATTGGAATGGAGTTACCAATTATCAATATTTAATTTGAGATCCTAGAGAGAGTGATTGGTTGGTCGGGAAGTGTTTTTATTTTCAAATATGAGATTACCAGTTTTTAGGTATGTATAATTTGAAAGCTCTTGATGTCTTTTAATAATATATTCTATTTTTTTTTCCAAATTTTCAGAAACCAAATATAACCTATTTTTTTTTAAAAGATAATTTACATTAATTTTTATATAGTTTCTAAGGTAAACACATGGTAGAATGGTAATAAATTTTTCTTAAAGAATCTGATTCATGACGTGCTAGTGGTTTGTTTCTCAATCACATATTTGAACATGAATCAACCAATTGCAACCTAAAAGTGCATGTTGTTGACTGGTATTCAAACCTAAAAGTACAATTATATTTTTGAAAATGTGTTAGATTTGAGACTTGTAGCGTAATTTTTTGGTTAAATCTAAGAATTTCATTATGAGGTGCTTTTTAGGTTGATTTTAAATAGAGGCACCCAAGTATGATAATTGATAAGCATGTTTAAAAAATACAGAATAGGTAAGGCTACGCCGATGTGATTGTATAAATAGGGGGAGAAAGAAG
>VvCYP94B1b  (1500 bp)
CTTTTAAAAGATTTACTCTACTTGCATAAATGCTATATCTCAAATAATAATTGCACAAAAATAGATTCCATTTAAAAATAATATAAAAAAATCCCATATTAAAACCAATTATTGTACAAAAATAACTATAAAACAGAATAACACGCCTATTTTTTCCCTTCATGAGAAGTCTTTCCTCAAATATTATCTATAATGAGTAATATAATACAACAATATATTATTTTAGTAATTTTTTAAAATCTATTATGCTAATAAAATTTGGAACTATTTGTCTTTTTTGAAAGAAAAAAAAAAACAAAGAAGAAGCTAATTCATTTAATTTGCAATGTATCCATTATGATAATCATGTGATTAATATTATATGGAAAATTATATATTCGACTGCCTTACACAAAGTAGCATCCAAAGAATATTATTATCACTATATATAATTCTTATGATAAAACTACTAGGGTGAGATTTTATTAGTTATTTTATTATGTCCTACACAAATAACATAGTAATATTATATGATAATATCGGGTCCAGTTATATTACCAAATGTTTTAGGGTTTTGTTTTGTAAAAAATGTGATCGTAATTGAGAGATTTTTTTTTCGAGAATTTCACAAGTGTATGTTTTTTTCCTTTGATTAATAGATTGTTAAATATTGGTGTACTCTGTGGACGTAGGGATCAGATCGATCATCGAACCACATCAAAATCTCGTAGTTTTCTTAATTTTCTACTCATGTGTATGTGATTTTTATTAACATTGATCTCATTACCCTATTTTATAGAAATAGATAATTTAAGTATTTATACATCGATATCATTTTTTGGGATCTCTATCTTTTTAATTTATATTATAATTTTATATATTTGTATCATCATCCAACCATTCATATTTCATTATTCATTTAAGGACTTACATCACAAGTTTGATGAATACTATAATATTGTTTCTACTATTATTTACTTATATGTTTGTAAGATCATTCAACGGTTTAAATTGAATTTAGCGATAACATTTTCCTATGTTGTCCACAATAATGTTTTTTTAATTTTTTTTATTAAATAATTTGGTGTACAAAACCATAAATGCATAAAAATAACTAATGTGATATGAAATGAAAATATCTAACATGTGCCAATCCCTATTTATAAAAAGCGACTTTAGATAACATGATAGAAATCCAATTCTATCCTGAGATTCCATTAAATTTCAACTCGATCCCAATTAACAGTTTCACCGCAATGGAATAGCCGTTTTTCAATCCGTGCATTTACGCACGTTTGTATTACTCCCGCAGCAATTCCGAAGGGTCCACTCGAAGTCCACACTTATTTTTATTGCCGCCGTCATTTATTCCTATACGGGAAATTGTATTACTGAGCTTTGCACATTGTGCACGTGATCGTCGACCTCGTTCCCCTCTCTCGAAAGCACGTATTTATACTAACCCGACCCTCTTCTCCATTCCACCCAAACCTCCAATTCAAATCTCCTTTTTCGGCTGAA
>VvCYP96A1a  (1500 bp)
CTGACACAACATGATAAGGATATGCATAAGAACGAAAAGGAAGAACTTTTAATCAACCACATGTTATCTTTTTCCTTGTAATTGATTGTTTCTCTGGTTAGTCATATCTGATTACCATTCAAGATTATTTTTCAAATGACCAGGCATTTTAAAAATTGAATATCAGACGGTAGATAACAGGAGTTTAAGTCCAAAATAATCTATTGGTAGAAAAAAAATTGTAAGAATAGTACTCATTTCAAAATATTTGTCAAAGTAATCTTTTGTATCCACATAAGCATCCATATGGATTTTTTTTTTTAGTATAAAAAACCATCGTTGGTAAGTCTGGTTTTAAAAGTTTTAGAAATATCATTAAAACCATAATCTATGACTGTGATTTCAAAATTATTTTTAATCCATCCCTATTTTAATGGTATTGTGAATTTAATATTATTTTTAAAATATTCTTTATCATAATAATCATAAAACCACAGTTAGTAACTGTGGTTTTAAAAATATCCTAAAAATTATAGTTACGGACTGTGGTTCACAAATATCTTTAAGGGGAATTCATATAACCATACATCAACTAAAAAAATATGAGATTTTAGAATTTTGTTTTTTTATTTTTAATTTTAATGTAAATTATGGATGTACCAAAATTTCTTAACGATGTACCAAATTTTCTTAAAGTTCGTTTCAAAATTGAGAAAATTTCTTACAATTTTCCATTGTCAGTTTAAAACTATTTTCTTTACAAATTATCCTTAATAAATTTTTTCTTTACGATTGTTTTAAAATTATATATATATATATATTTCATATTTTCCTTGAAATTTTGATAAAATAATTTCATTTACATGCATTCCCATAAAAATTTATATATTTATTTGTTTTATGAATTTTATCACATATGAATTAAAGAAAATTATTTTTTCATATTATTTTTAAATTTTAAAATAACTAAGCAAATTGTTTATATTATTTAAAATTTTATATTTTCATATAAAAAATAATGTCGATGATTATGATTTTAAGTTATTCCTTACTAATTGTGGTTTTATGGATATTATGATAAAAAATATTTTACCATTAAAATGGGGGTGGATTAAAAATAATTTTGAAATCATATTTACTAATTGTGATTCTAAGAAAAATTGTAAAACTACCATTGGTGTGACTGTGGTTTTAAAGATATTTCTGAAACTATAAAACCATAGTTAGCAATGGTGGTTTTTTACACTTAAAAAATAACTATGTGAATGTTTACGTAAATACAAAATATTACTTTGACAACTATTCTTATTTTGGACTGAAACTCAGATCCCAAACACTGCACAAATGTCACATCAGGTATACTAATATGGGTATTGATGTGTGGCCTATATTTGATAGAAAGAGATGATACAAAAGATGCAAAAGATATGGTGAACAGTGCAAAAGGCTGGAAAATCCAGCAAATTTTTTCCCCATACCTGGTAGTAGTGTTGATCAATTCCACAAGCATTTGCAGCTCTG
>VvCYP96A1c  (1500 bp)
AAGAAACTGGAGTTGAAAAAAAAGGCAAAATTTCCAAGCTAGGAACAAGAACTTCCAACAAAATCAAATTATCTTAGTTTATAAGAAGATTCTCTCTATTCTTCTACTTCCATAAAATTTGAATACTTACCTTCCTTAATATATTAGATCGATGAAATGTTTTTTATTCATTTTTATTGAAAAGAAATAATTTGAGTAAAATATTTCTCTTTTAACGGGTTTATTTCCTTTGTTTATGAGATTATTTTCTCATGATAAGTTATGAAAAAAATTCTAGACTGAAATGCTATCTATGCCTCAATTTTGGACTAATAAAAATTTTATTGACAGCAAAAAGGATAATTTTATCATTTTTCTCACCTTTTATATATTAAGATCTAACTTTAATTATTTATTTATTTATTTTTAGAAAATTAAATGTTTTTAGAGTTTGTATTTTGATAAATTATATGCTTAAGTTTGATTAGGATTAAAAAATATTAATTTAAGGTTAATTTACAGGGTTCTATAAATATGTGGTTTTATATTAAATTTACATAAATAAAAAAAGTAAATTTGGAACAAAAAATGGTTGAAAGTGTTTGAAGTATGTATTATTAAAATTTATTAATAAATTTGATATTTCCCATTGTGTTTAATTGTTATGTTTTTTTTTCTAATTAATATCGATTGTATTTTTTATTTTATTTTTTTGTAATTGATATCAGACTCATGATGAGAAAAATCGTGGGAACAATTATTTTGAAGATGAAGTGGGAGCTTCTATTATTGATATTTTTATCATTTTTCTCATAGATAGAACTTGAAGAGAGGATAAGTTTGAATTTTTCCAAAATAGGCAACAAGAGAAGGAAATATGGTTACATTTGGGTCATTGGGAGTTTGGTTTGGACTTTACATTTCGGAATAGCTTTTCCAAGATCCGATCGATAGTATAAGGAGATATCGTCACACCTATCTCACTGCTCTTATGTCTCTATGAATCTGTAGAAACCAAATTAATAGAGGACTTGATGATCTGTTTCAACGACTGTGCACATGTATGAGATCTCAAATATCTCAAACGTTGAAAATAATCCATTAAAATAAATAAGTGGGTCCCTCTAGCTATGCTAACAGCATACTTTAAAGTAAGAGCCAATCACAGCCCACCAAGAATATCACAAAAATGGTAATATTTATTTATACCTTAGTTTTGGTCCCATTATTTATATTTTGATTTTTTTGTTCTTTCTAACTGTATCCAACGGTTCAAATTCTGTTATAGAAATCAATGACTCACATTGAAAGTTCGAAGTGTACTCTTTCCGTAGTTTAGCATAATCCTGAAACCTAGAAATGTTGGGTGATGGTTATCAGTCATTTCATCATATTAATGTGGGTAGGGCTAATCAATAATAATTTATTCTCGTGAGCATGGATCATCCCTTCACTAAAAAAATAGTATAAAGCTGGCTTCAACTGAAGCAATACCCTAGCAGAAAGAAGACTGCAGCTCCA
>>VvCYP710A1  (1500 bp)
AAGTCAAATTATTGGTACTGAAGCTTCTTTAATAATCCATTGACTATTTTCAACAGTTGAAAAGGGAAAATGAATCATATATATATCATATCCCCGCAATGTATTTGTCATAGTTGTACTTTATAGTAATAATATTTTTAAAAAAATTATTTATTTTTTTATAAAACTTATAAACTTTTTTTATAATTGTTCTTGAAATAGTTTTTTGTTTTACGAATACGCTCTTAAACTTTATCTTCAAAAATTGTTTTATAAAATAGTTTTTAAAAATTGTTCTATCATATTTTATGGAATAAAACCTTGTTTGCGAGCTTGAAATATTTTTCATTTATTTTTTATATTTTAAAAAAAATTTATGTGTTACTTTGATTTTAATTATTTTTTATATTTATAATAATTATATTTTAAAATAACCCTAAAAAATAAGTGAAAACCACTTAAAACAATTAAAAGATATACTATAAAAACAACATATTTACTATTGATACCATCAAACAAAAGATTTGAGTTTTAAAGTATGTATGATACGACCTAGACTTTTGAATGAGGATATATAAATAAATGACATCAAGATACAGTGATTCAAATGAATATGGCTAAATATAAATTATACACGTGGATTGATGTTTTGACTGACACCTTTTTAGAAATTAGTAATACGACCCTTCTAGAAATTAGTTTTCTTTTGATCATTTAACATTTTTTCAAAAGAATAATAAGTGGTAAAATGGAAGCATATAGTCAAATCTAACTGTTTAAGAAAGGGGAAGAAATCTTGAAGGGAATCACAAGGGGGCCAAGTACGGCCAAACAAAGCTCTTATGGTTAATGTAGACGCATTTAAATAATAATAAGAGTTTAAAATAAAAGTAAAAAGGTCGGTGAGTACTGAGTAGGGAGTTATTGGGGGTATTTTGTGGGTAAGACAAGACGTAAGAGTAGGACTTGAGAGCAAGTGAGCAACTGCTGTCAATTTTTTTTTGAGACGTGGCCGGTGTGAGGGTTGGAATTTAACTTGTGAAATTATGGATTTAGACATACTAAACATTCCAATTCATGATTCATCCCAACGGCTTTGTCATGTTATGCCCACAGTTTATAACCCTTGTCCTTTCTCCCTCTTTATGGATTCTGCCACATCACACCCTCACCCCGCCTCCCTCTGCCCCGCTGGCATGACCCCACCACTCTCCTCTTCATCCTCCTCCGCCTTCACTGCCCTTTTTATATCTCTCCCACCCCCCATTTCCACTCCTCCTCCTCCTCATCCTCATTTTTCCCGCTTCTCTCCCTCTACATTGTGCATTACCCTCTCTCTCAAACATAAACTATTTTGTATTTTGTTTCTGTGTCTGCTCCATTTTCACTGGCGACAAACACCACCAGCTCTCTTCAATTGACCCAACAAGTCTCTCCGTTGACCCTTCCTCCTTCATCGTTTCTCTCTCTAAAAACCCATCTCCCTTGTCTCTCTCACAGTCATTCACAGCAGCGCTGAGC
>VvCYP711A1b  (1500 bp)
CAAATCTCTAAATCTAAAAAGGTTATAATGAGGTATATATACACAAAAAAACACTAGGGAGTTGATATTTCAAAGTTTCCAAACTTGATTTACATGAATATCTCAACAATATTATGAGAAATTCGATAGGAGCACTTGAGTGCATTTAACTACCTCTTGAGCATTGTTTTCTACTTGAGTAGATTTTAAATATTAAAGAAAAATATTTTTTAATTTCAGAAAAATATACTAATCCCTTTTGTAAGCTTTATAAACCTAATATACCAAAAGTCTAATATTTTTAGATATATTTGTGATTTTTCGATTAGATGAATAGCAGTTTTAGATTTTCAATAAAGAGTGAGTTATTATTTAAAAAAATTCTTAAGTTAGAAAATAAAATATAACAAAATTTCCAACCTACAATAAGGGCTTATTTTGCTAACAAAGAGGAAATGATCCCACTTTGGCTTGCAATGTGTTAGAATAGTTAACAAATCCTATGATCTCAATTTTTTTTTTTTCTTAAAAAAAAAGGTGATTTGATAAGAAGACAAACCCATACTTCAGCTGTGCTGTGTCTGTGGTTGGAGTCGTAGTAAAAATCTATGGGCATAGAGCTCTGAATTTTCTTCACCAATTAGAAGAAAACCCACTTAGTAATAAAATAAAATAAAGGGTGAGCGTTTCCCAAATGTTATCATTCAATGAGGATACAAGGCTTCAGTGGGCATCAATTCACCTAATGGGAGGAGGGATAGGGACCTTATCAATTAAAAAAGGCCTCTTGCAGAGACCTTCAAATATATATATATCTCTCTCTCCCAATATCTCTTCCTTCATCAAAATCTCTCTCTCTCTCCCCCAATATCTCTTTATTATACACCATGTACAATAATTTTAAAACATAAAAAATATATTCTTCTCATTTTCTTCCTTCTTGTTTTTCTAGTGACGTAAAATCAAATAAAAAAGGGAAAAAAAAGGGGGAATAATTGTTCTTAATGCATAATAGTAATCGTTATAAAGAGGAAGCTCAAACAATGACAGCATATAATCCAAAAGGGCATCCCAACAATGCCATTATCAAATGAGAAGGATATTCTCTCCTAGAAAGACAATGCAACTCCCTTGTCATTGAAAGCAAGAACATGGATTAAATAAAAATCAGGCACAAGATTAGATAAAAAGACCAGCCATGAGTTGGAAAAGAGCCTCATTTCAGCAGTCCAAGGCTTCAGCTGTGCTGTGGCTGTTTTTGGAGACAGTGAAAATATAGAGCTCTGAATTTTCTTCACCAATCAGGGGGGAAATAAATAGCCACTTAGTAAGAAAATAGAATACAGGGTGGGCATTTCTCAAATGTTATCATTCAATGAGAAGAAAAGGCTAAGTGGGCATCACCCACCTACTGAGAGGGATAGGGACCTTATCAATTAAGAAAGGTCTCTTGCAGAGACCTTCAATATATATATCTCTCTATCTCCATCTCTCTTTCTTCATTAAAATCTCTCTCTCAAT
>VvCYP71A25   (387 bp)
TGCCATCTTCTCAAATAGGCCTAAATCAAACATCTCGGCAAAGCTTCTCTATGATTACAAGGACGTTTCCACGGCCCCCTATGGAGAGTACTGGAGACAGATGAGGAGTATCTGTGTACTCCACCTTCTCAGCACCAGAAGGGTTCAGTCCTTCCGAGGTGTCCGAGAAGAAGAGACAGCCCTTCTGATGGAGAAGATCTCTTCCTCTTCTTCCTCCTCCATCCCAATTGATTTGAGCCAAATGTTTCTGTCCCTAACAAATGATCTCATATGCAGAGTTGCCCTAGGACGAAAATACAGTGGAGATGAAAATGGAAGAAAATATAGAGAACTGCTGAAGGAGTTTGGGGCGTTGCTGGGTTGCTTCAATGTTGGCGACTACATCCC
>VvCYP71A23   (1500 bp)
TATCTTCCTTCATCAGGCAATTGTGCCTACATATGGTTCCTTTTTATGCCTGGAACTGGTACTTTTAGTCCACTGAACCTGTGTTAGCACCAGAAATAACAACATGAAGATACCTATCAAGAAAAATATAAGTGACCAAGAGAGTAGACCGGCTCCGGCATACTTATATTAGACTTTCAGAGATAAATAAGTAAAGAGAACATTGATCAAATCATATTGGAGATGAGCTTGTAAGTCTATGTATTGTGTGGTAGGTAAAGAGGAGGCACAACTTGGGCTGAAAGCACCTGAACTGAACTTTCCACTAAGTCATTTTCTCTTGAGCGGCTAAAAATGGGACCATCAAGAGACTGGCCTACCTCAAAATCTGACCTCAATCAGTGATTAAAATATTGTAATATTTCCACAATATATCGTTGAAATATCGTGTATTGGTGGATCTCGACATGATATATAGAAAAGAAATATCGACACCTCGATATTTTGGCAATTTATTGAAAATTTCACCAAATTTTCACAATTTATCAGCAATTTATTGATTTTTCGCTAATATTTTGACTGGTCAAACTTCAAAAAATTTCAAATCTTCTATTGCTGTTGAGGGAATCGAACCCTAACCAAAATGTTCACCAATCGCTGAGACAAGTTTGCCCCTTATTATATGTGACACTAAAAATATATATACTAAAACTCATTATATAAACATAATATTAAAAGAATGTTTTAAATAACAAGTTAATTATAATTATTTTATAATTAAATGAAAAAAAATTATTTAATTAATTACTAAAAATATAAATTTTATCGTGATAATTTTTTTTCATAGTATTTTTAATATCATTAATATATTAATTAAATATTAAAAATCATACATATATCATTATTTATTTTATATCATTTAACACAATTGAATTAAATAGATTATAAATTTAATTTTAATATTAAATATAATTTTTAATAATGAAATATCACAATATTATGTCAAATAATATTTAATATAATTTAATAATAAATGTATATTTATAAAATATATATTTTTTAATATGTACATACAATATTACCATTAAATATGATAAATTATAATATATATATATATATATATCAATTTTTTTATAAATAAAGTAATTTTAAAATATTTATTATATTTTTAATTTTATTTTTAAAAATTTTATTTTTATATATTTATAAGTTTCGATCAATTTTAGGTATATTTTATATCAAAATATGATATATTTTTTATATATTAAGTATATTCATAAAATAAAATTAGCCGTATATTTATAATTATTGATAATTTCATCCTTATCCTCAACCACCACCACTTTTGTTTTTTTTTTTTTTTAAAAAAAAGTTCCCCTCGGTGGGAATCTACCTCGAGATCGGGCAAAATCACCAACCCATGGGCCATGGCACTTGCGGAAGAAGCTGTCAGCCCGGGACCACGCTTGTCAACAACGTCAACGACAAAATGAAATGAACTAAAAAAGGAAAAGGAGGAGG
>VvCYP71B10g  (1500 bp)
ATATTTAGATAAATGACTCTGATCAAGGCTAAATAAAATACCTATGTTTGGTTCTTAAAAAATATTTAAAAAAAAGGAAAAAATTATTAAGAAAAATGATTTTTACATATATGATTTTATTAAAATAAATATGAAGAAAAATAAAATATAATAAAAAAGTGATAGAAATTTATGTATTTTAAAATTATTGAATTTATACGTAATGAAGAAAAATGAGTTTAAAGAATCATGACAAAAAAATTAAATATTAAATCTGTTTTTTATTTTTATTTTTTAGTTTTTTTATTTCTCTTACATATTCCCTCAAATTTCCTAAAACCCAACATAGCGTAAAAAGTGGTAAACTAATCGGTTTGATAACATTTGACTGAACTAGGCAATTTAAATTTTGATTTGGTATGATATTCCTCCACAAGATGGCAGTCCCTTTAGAGATACCTGACTCGCACATAAAAAGGCCGCTCCCTTTTTAATTTGGTGATTTGGTGACAAGATCTATGAAATGAATTAGCATAAAGGTATATGAAACCAATGTTATAATGCTATGTTATATCATAGGAGCCTTGGTGATGGAAGTGCATCGTTTGGTTTAGAGTATCAAATTCAAACCAAGTCATCTAATAAGTTTTTATGCATTAAGAATTGAATAATTGAACTTAGAAAATTAAATGATCGATTCAATTTAGTTTGGTTTAATAATAATAATCAATTTAATTACTTGATTTACTTTGTTTCGATTTTATAACAGAAAATAACTATTTTTTCTTTTGTTAATTTGGACTAAAACCAACAACTATATAATTGAATATTGTAGACAAAAAGTTTAAATAATATTATTATAATAAATCACCCCATATTATTGCAACTCATTTATCTTAAATCCGACAAAAAGACATTATTTATGTTTGCTTTTGTCACTTTTTCTTTATATTATAAATCCTTGTTTGTTTTATAAAGTAAGAAAAATGAGGTGAAATGATTCAATAAATGTAAATGATATATATATATATATATATATCTTTAAAAATGATGACTTGAAATCAATAATTAACTATTTCAAGGAGTTAATGTTTTAGACTTATCCAAAATATCATTTCTCTTTTTTTTTTCTTTTTTTTTTTTTGCATTTTTTTTTCCTTCTTCTTTTTCAATTTTTTTTTTCATTTTTTAACTAAATCAAAATAGAAAAACTAAAACAATGAAGGGTGCCTAAGATGAAAAATGCGAAAACAAAGGGAAATGAAAAAAGAGATAAAAAAAAAAAAAAAAAAAAGCGCAGTTATGAGTGATCAATGATAATATAAAAACCCAAAATTAGTTTAGTCGAAACAAAATATAAAAATTCATGTTTCATAGAGCCACCTACTTTTCTTATGTCAGGCTTGACTCCCTCAATTATTGTTAGCTGAGTGGAGGAAAATTTAGGGACTATAAATAACTGGGCTTCCATTGTTAAGGGACACCAAGCACAAACATCACTCACCAGTTTCATAGAGCTTC
>VvCYP71B31   (1500 bp)
AATACTATTTTTATTAGAAATTATTTTATTAAAAATTAATTATTATTTAAATATAGATAAAAATTACTTTTAATGATTTTTTCATTAATTTATTATATTAAAAAAATTAAGAGAAGCACATTTCAAGTATTAAATCAAGAATAAGTTCAAATATATGATTTTTAAACTTTTGTTAAATATTTAATTTTTTATTAAAAAAAATCACTTTAACATTTTTAGAATTAACTTTAGGCATAATGTATAAATTTTATCATCTAACAATGGTCTTATTATATATTAAATAGAGTCACTTAGCTTATATGTCTTTATGAAAACATAAATTTATACAAAATCATTGAATACGTTTTTTTTTTGCTTTTAATGCTTCCATTTCTCACTATTATATATATTTTTAGAAAAAGTTTATTTTACATCCTATCAAAATTTACATTGAATTCCTTATGAAATAATGTCTATAAACAAATAACACGTCATTCCACTAAAATAGGTTGGAATGTCTGTATATCTAATTTATGCAAAGAAGATGTCCTATTCAGCAATCCAGGTTATCCCATATAACTTTCTAAAGCATTTCTCATATAATCGGTTTTTTTTTTCAAATTTAACTATTAGTAACTCCTATGTTTGAAACAAGATATTGTCTAATTAGTCCGTTAATTAAAAATGTTTAGAGAAATCCTATTGCTATTTCGCGAGGCAATCCACATTGATGTAATGAAAGTGAAGGGCCTACGATAATGACAAAATGCCCCAAACAATCGACCTGTTTGCAAAGTTGAGTCTCACAAAATCTATCTTCTTTGTCTTCAATTATATTCGAAAATAATTTATAAACCTTATTATGACCATCATTTATTAATGGTACATACTAAAAATAAATAAAATTTAAATTTAATATATTTAACTAAAAATATATAGAATTTTATACACATTAACCTCTTACATTTGTTTTAGAAATATTTTATTTTAAAAATCGTCTTTTCTACGTGTATCAATGGGCCATGTTGGTTTTTTCTTTTTAAAAGAAATTAAGTAGAATATTTGGGTTTGATGACCCATTAATATTCATAAATTAGTCAGAGGGGTTGATCATTCACCCTTGAAGATGGAATTTACAGTTGACAATGAATTTGGATTTTGTGTTTGATTGAATTAAGAATCCAAAACCAAAATCAATTTATCAGTTAGGAGTAGACCAATAACAACTTGTCATCTTCTATATGAAAAAGGTTAATTTTAAATGGAAAATAATTAAAATTTTAGAGTAGATATCATGAAACAGAGACATAAATCAATAATAACCGTTCCAAAAATTAAGAGCACTTTTAATACCATGGAGAGGAATCTTTAGCATTCCGTATAATATATCTATTTTTGTGATTATTGCAACAAATTAAAATAAACTCAAATTATTCCATAAATATATTAATTCCTCAAATAAACATACAGCAGTTTATTTCTACGTACTTTTGAGTGATGAGGCTTACAATTTTTAAAACA
>VvCYP71B10h  (1500 bp)
TGGCTCCATTATTGTTCTGTCTTCTGACTTACGTTACCTCAATCGCTTGTCACCATTGGTGAGAGACCCCACCATGATGAATACAAGGCAACCCATTAAGATTTTTCTTCAGAGATAGGGGGTGTTGGACCCCACCACAACTCCAACTTGCTGGAGGGTAATGTAAATCACGAGTTAATACTGAGGAAGCCGCACAAACTGTGGGACTTTGAATGGAACGTAGAAGAAATCTAACATACGAAATGAGAAAACTGGTAGCCTGGTTGGTCCAATTATCTTGTCTCTCGCATCACCATTTACCAAACTTTAGACTATCGCTATTTAAGCCATTAGGAGAGTGTTTTGCAAAGACACGGCGTCTTCAAATCTTCTCTAATTCCAGAGCTCCAGTAGGTGGAGGCTTGGAGCATCAAGTTTTAAGGTGGGATCGTAATTCAGTGGCAAAATGTGGGATGATATCACATTCAGTCAGTGGTGCTCTTTCTTCAAAGCTATGATTCATAAAGGGCCAAAAATCTCTCACGTCATGATGGAACGATTTAGCTTTAAATTGACTGATGATTGAACACTATTGCATTGATTCCACAAAAAAATAAAATAAAATAATAATAATAATAATAAGGCATGACAGGATCAAGTCGGCTAAAGGGTTGGAAAGATTGGATTTATACGAAAGTATCAAGCTAGCTAAAGGGAAGAGTTTTCTATTTTTGACTTTACTTAGAATTTGAAGATAAGGGAATGTTTGGTAAAATTACTTAATAACTTAAGGTAGTTTTAAAGTTAAATATACTTAAATTGTTAATTTAAAATTTATTATTTAATTTTTATTTTAATATTAAGATTGTTTAATTAAATTTATTATAAATCATTAAATTAACATATTTATTCTTATAAATTATAATTAAGCTAAGTTAGGACGATTAATAATATAGGTCATGGGGTAATAAATAAAAAGGTTGAAATAAATAGGCAAATAAAGGTAAAAATGTAAAATTAAAATATGGACTTAACAATAAATTAATTATTATTTTTTACTTTAACTCATACCATTAATTTTTTTAATAAACATATTTAATTTATTTAATAACTTAAATTAAATTATTAAGTTACTTTAAGTTATTAAGTTGATTTATCACATACCCACTGAATTTATAATTTTATAATTTTAAAGGGGTAATATTGATATTATAAAATTTTATTAAATATGAAAATATATATAAATATTAATATTATAAAATTTTATTAGATATGAAAAAAAAAAAGAATTTATAAATTAAAATAAAGCTTTTAAAGAAATAATATTTTCCTCAATTTCATATTAGACTTTTTTTAACTCAAATTATTTTGAACAAAGTTAACCTAATAATTAGAAAAGCTCTTATTGAGTTTTAAATAAAAATTTTACACTCCTTACAAGTCAGATACAAACTGAGCTTGTAAATATATGGTCATCCATGTAGAAAGCTTTGCAATTGTTCTTCATTCGAAGAAGCTCCA
>VvCYP71B20  (1500 bp)
TGTAGGATAGCCTTTTGTCACGGACTTAGTCGTTCACTAAGCTCGTGCGGCACTTGACAAGCCAAGACGCTTGATCTTGCTAAGTCAGCCTTGCTCCCTAATGTTTAGCTTGCTAGGTTAAGACACTCGCGATTCAAAAGCTTAAGAAGCTTGGTAGGCAACTCCTTAAAGAATGGAAGCTCTTATTAACTCAAGAAAGCCTTTACAAGTGCTTGGATGCTCACTTACTTGGTTAGGAAGTGATTTGGGTGGTGCCTTGACCAAATGAGGGCCTTACCTATTTATAGGCACCAATGGAACTCTCTGGAACCTTGGAGGGTTCCTTACAAATCAAGAATATTCTAGAACTCCCTATACTAATCTAAGTACAACTCTATGTACAAGAATATACAAGAGACCTCTAAAATTCTCTAGAAAGCCTTGGACTCCTCTCATGCCTTCCACCATAGTGTAGAGATGTGTGGACATCTTTAGGCATCTTTAGAACCTTTCACACTTTTCCCACCAATGACTTAGTATAGATGGCTCTAGGAGTTTCCAGAAGCTTGCCTCCTTTTATATAAGCCCATGGGAAGGGTTATTTGAAGCATCTTGTGACACTTTGCTGGCCAAGCGAGGAAGACCTACTAGAAAATTCAAGATCATGTGCTTTCAAGAGCTCTTTTGCCATTTTGGCCAAAGAATCCACCAGGGTAGGCACCAAGCCGAGGCCCAAGGACAAGATGGGTCCATATTGCTTAGAGAGCTGCCATAGGTAGACATGAGGGGTTGAGTTATCCATCTGGTACAAGTTCCCAATGAAGGGAAGCCCAGGACCAGGTGGAAGATGAAGTTCAATATTTTAGAATCTTGTTAGTATAAAATCAAATTTAATTTTTTTTAATAAAATTGTATTTAATGGATTCTTTTGATAAAATTGAATTAAACTTTTTTAAATAAATAAACTGAAATCATTAATTTGAAATTACTTTTAATATAAATAAATTCTTTTTGAAATTTCTTAAAAATCTTGTAATCTTTAAAATAATTAAATCATTTTTTTTATCAATTTAATAAATCATCTTGTATAATTCTCATGTTATTCTTTTTATACACTCTTATAATATGATTTTGTCACCATGATTTGTTATATATTGATTTGTGTCATTTTGTTTTTGGGTATCATAATTAATTAATTAATTATCATAATTCATTTTTATTGAACTTTTGACTATCATCTTTTTGAATTCTTCTCCTTCTTAATTACTCCTTACCTTGTTTTCTTAAGATCATTTTGTTTACCACATTCAAATATAAACATTAGATTTAAGCACAAAATAAATCAAACCTTCATCTAATAGCAACATTTATTTATTCCAAAAGTCTTATTTTTCTAACACAAATTCAAATAGTTTATATACTAAATTTGGAAAAATTATATTTTTAAAGTTGATTACATCAAAATATTTATTTTCTTAAAATTATTTTTAGAATTCTTTTTTTATTGTTGAAAGTTGGGAT
>VvCYP75B1b  (1500 bp)
TTTTCCTCATAATAAATTTCCAATCTTGATTCATTATAATTTTTTAATGAAATAATTCAAAAAAACTACATACAAGTTGTTATACATCTTGCTCATGTGTGTAAAAGGAAAGAGATACATCCTTGTTTTTCAACTATTAAAATGATATCCTTGGGCCAATTCTTTCATTACGTCTGAATATTTTGGGAGAATTGTGGAACCATTTTGAGACAGTGAATTTAAATAGCATTTTTAATATTTTAAAAAATTATTATTAAAAACGTTTTTTAATATCCATTTTTTCAACATCAGGACCAAGAACGCAAAATAAAATATAATTTTCCCTACTTGCTACCAAAGATTTTGGTTGATTATTTTTCTGATAATAAATAATATTTTATTTTGCGTTCTTGGTCAAAAAATGGATATTAAAATATATATAATTTTTCAGCTACAACAGCGCGCACGGAGCACGCTCTTAGTTAGAACACACTTGTACCCGTCATCTTTGATTTAGCTAACCCCGAATCTCCCTTTATATTCCTCTCTGGATTCAGGAGCCGAGACTCAGAGATAAGCCAAGAAGCCATGAATCCCCTGGCGCTGATTTTCTGCACGGCTCTCTTCTGCATTCTCCTCTACCACTTCCTCACGCGCCGCTCTGTCCGCCTCCCTCCGGGGCCCAAGCCATGGCCGATTGTGGGGAACCTCCCTCACCTGGGCCCCGTCCCTCACCACTCCATTGCTGCGCTCGCTAAAACCTACGGCCCTCTCATGCATCTCCGTATGGGCTTCGTCGACGTCGTGGTGGCCGCCTCCGCCTCCGTTGCCGCTCAGTTCTTGAAAACTCATGATGCTAATTTCTCCAACAGGCCTCCTAATTCAGGTGCCAAGCATATCGCCTACAACTATCAGGATCTGGTGTTCGCTCCCTACGGCCCCCGGTGGCGCATGCTCCGCAAGATTTGCTCCGTCCACCTCTTCTCTGGCCAAGCCTTGGATGATTTTCGCCATATCCGACAGGTACCTAGCTTAATCTCTCTCAGAAATGAATCCTTTCTCAATTTTAATCCATTTTTCGTTTTTTCTTCCTGATCGCTTCTATTATTTCATCGCAAATTAAGATCTGGTTACACAGATTTCATTTTTCCATAAAAACATGTAAGAAAATAATAGCATGTGTTCACCATCATTGTCTAGTCCTGTCAGAGTATTTGCAGTCTCCACTCTCTCTGTATACACTACACATCTTTTTGAAGAAGGCCCGGCTCCACAAGTTTATTATTACTATTTTTTTAATGATTTTTTTTAGTAAGGTTGTTTTCCTCCGGCAGTGGAAGTCCGTGCATTCACGCGAGACTTTACCATTTAATATTTAAAATTATATTTTTTTAATGTTTGTTTTATAAAAATACTGAACTGACAAATGAGTTGCCGCTGAGTTTTATCCAATTTTGATGATTAGAAAAATAATCAGTAGATGAAAATTTATGTGACGTACAGGAGGAGGTTTTGGCGCTA
>VvCYP76C1d  (360 bp)  
TAACAAAGAAATTCCTGCCCGTTGGTATATAGAGGCTGAGAAATCAAAACGTAAAGGTTGAGAGATACTGCTTGTTGGGAACCAGAGAGAAAGAGGAAGAGAGACATGGAGTTGTTGAGTTGTCTGCTGTGTTTTCTTGCTGCTTGGACTTCAATTTACATCATGTTTTCAGCCAGAAGAGGAAGAAAGCATGCTGCTCACAAACTTCCTCCAGGACCAGTTCCGCTTCCCATAATAGGAAGCCTCTTAAACCTGGGTAACAGACCCCATGAGTCCCTCGCCAATCTTGCAAAAACTTACGGCCCAATTATGACTCTCAAACTTGGCTATGTAACCACAATAGTCATCTCTTCTGCCCCC
>VvCYP76C1g  (1500 bp)
CACACCCCATACGATATCCTTGATCTCTTGTGAAAATTTAGAATCATGATGAACCAAATCAGTAGAGAAAACAGTGTTGGCACTACAAGGAAAAAGATATATGGTGACATTTATAATAAGTCACTATAAACATAGGGTGTCACTACAACATAGCGTCACCTTATCCACTGACACCATAGAGGGTATCAATTGGTGACATATTTGGAAGTGACACCAAAACAGATAAATGGTGACACATTCAAAAGAGACACCATATATTTTTAGTGATGCTTAATTTGATATAGAGTTGTATGAGATATATAAGGTGTCATATTAAATGCATCATCTTTGAGTTATGGTGTCACATTAAATGTATCACCTTTAATTTATGGTGTCACATCATTGTAAATGATTATGGAAGATAGGGTTGTTTTTTGTTGATTAGTTTGTAGATTTTTGTAATGCTTATTAATAAATAAGACTAACCTGTGTAAATTGTCCATAAATATAATAATCATATTACATTTAACTTATATTTTCATAATGCTTATGAATTAATTTGTAACATATTACATCATCCAATAATATTTGTATATCAAATGTTCACAAAATGATAGTACATCAAACACATCAAACCCACCAAAACTAAAAAAGAAAAGTGAATACACATTAAAACATGATTTAGAAATGTTAAGCTTCCCAACATTCATGTATACTTGCATTTCATATGCATAAAACCGGCTAACCATAAAATGACACAAGAGTTGCATCTAAAAACCCAAAATTCTCAATTCCAAATAAAGTAACATTTATGTCCTATAATGTATGACATAAGAGTCATATCTAAAAACCTAAATCTTGTTGCCTCTTTCTCCTTTCTTTTTATTCTTCATATTGTCCTCCCAAGAGTGTATACCTGCATTTCATAGTTTAATGAGTTTTAGAGTTCTTATTGAAAATAAAAATGTGATGCTATAAACAATAAACAAATCTAAGTACTAATGTTTTCTTTTTATTTTTCCTTTTTCTCATTTTGGTATAAAAATAGTTCGTAAAGAATAAGTAATGTTATACAATATCAATGGAAAATTCAATCATATAACAAATAAGGGACTTACCATGAATGATCACAATACATCAATATGATTCATGATTAGTTATAACACAAAAGTAATCTATTTTTCTCTAATTTCATCAAATTCTACTTGAGAATATGTTTTATTTGTCATCAAACTGAAATCAAATGAGAATAACATTAATATCACAATAATTGAAAGTATGAAATTATGTACAATTCATTAAACGAGTAAAACCTTTGATGCAATAACTGTAAAATCAACAATTATTTCTTTAATGAATCTCATAACAAAGTAGTCATATTTGAACTCAGTATTATTTTTTTACTATTAAATTATTTTTAAACAAAATAACAATTATTAATATATTGGTTCATTTTAAATACTTTCATAAGAATATATTTTAACTGCAAGTTATTTTAATTTCTCAAAAGATTTTTAGGAA
>VvCYP76C1h  (1500 bp)
CTGCGTGCTGCAAATCTTCCTGAGGTTGCGCCAATGAGCGGATGCCGGTAGAAAGACCACTGAAAATTTGTGATGGTTCACGGCTTGGACGGCATTGAGGACAGCCCTGCTGGAGAAGGCTTGGTCATTTTTGTTTAGCACTTGAGGAAATGACTATGGTGGTGGTGCTCCCTAGCTTGAGAGACATTAGAGGGCCATAAGTTTTGGAGAGAGTTGTGAGTGATTGGTGCGGTTTATCGCCAAGTTCAAGGAGGTTTCCGATGATGGGGAAAGGGCGGGGGCCTGGCTGAAGCCTGGCCATGCCGAATTTCCGCTTGCTGGAGCCAAGAGCACTAATTGGGGCGTTAATGCATGACCAGAGAAAAGAAAGTAGAAGAAGCAGTATGCTATAATTCATGGCTTTTTACTTTGTCAAACTTGTCTACCTTCTTTGTCTATATATACTACCAGAGGTTGCATCTCAACATTGATTACATAATAGTTTTTCAAGTTCACGGGAGTGCATACAATGTTGAAGTTGAAAAAGAAAGAGTTGAGTAGGTCAGATTGGTGGGACAGTGCATTTAAGAGGGGGGGTACGTCCACCTGATCGCCTACAGCTAGCATTCAACTTGAGTAGAAAGGTTCATGGAATAGGGCTAATTTTAACCTGAGGCTTATATATACTAGTTCAAATATAGACTAGAGAAATTAAGTGAAAACTAAACAAACCCGAAAACACTAACAATCGGAAAAAGGAAAATAAAGTTTAGACACTTATCGAAATAAGGGTAACTGAGGTTTCATAGAGTATTGTCCTTAAAGTCGATTTGCTCTTCCCAAAAATTAATCTCAATGATACAAAGACTAGCATCCGATCTTTAGGATTCAATAGCCAAAACTTCATCTAAGGTGTACTCCTTGAATGAGGTACACCACAACTCAAGTAGTTGGGAATGCTTTTGAGATTTTGAAGTTCCTTTAAAAAAATATACGAGACAAGACTGACTACAGGAAATCTATAATAGTAGATACACGAGATGATGCGCGTTAAGGATTTTCGAATGGGCTACTTGATATCACAATGGATGAGCTTAACTTTGATGGGCGCACGAGACTCCCTGTTCCCCCTTCACGAGCCAAAGATGAAGTAAAAGTAGTAAAAAATATAAAGCACATTAAGTGTTCAATTCCTTTTTGATGTAAGATTGTTTACTTAATGCTTATGCACTCTAATACACATACTCTTCCATCAAAATATACTCAAATTATCATTAGTCTAAAAATTGATTCAATACTTCTATTAATTTGAGACAAGTGGAAAGTGAATGAAATTAATAAATGGACAAAATACAAAAGATATTTAAAGATACTTTAAAGTAAAAATAACCAATTATATATATAATCACATAAGGGGAGATAAATGAAACTAATCTTGTAAGTATATTGAATGTAAAGAAAAGTACAAAATATTTATCTTTGGAAAAATACAGGACATGAATGGATGCATGGTCCGTTGAC
>VvCYP76C5c  (792 bp)
GCTCTACTCTATTTTCTTTCCAGTTTATGTTGTTCTCCATCTTTGTTCATCGCAACCACCTTATATAAAAAAGAGTGACCCTATTGTATTTAACAATGCGCTACCAAGTGCTTTAGAAATTACAGTTTGAAAATATCATAATGAAAAAAACAAAACTAAAGAAAGAGGAAGGAGTGATTGAAGTGGCTCTTTCAATTGTTCAACTGAGAGCCACTTGTTTTCTATTTGTATGCGTTTCTTGAACAGAGGAGCACAGGGGAATTTCTTAGGTTGGTCGAGTTTCTAACGGCCTCACAACTTTTGCTCACTCATCTAACTCCTAACAATTATTGTCACTGATTTCTAAAATACTGAAAAATGGTAAATTGAGTCCATGGCTTTTCACCTTCTCAATTAATGCTTTGATTATTTGCTTTTCTTCTTCCTGGTGAAACGATCGAAGTCTACTGAGCTTGAGCTTTAGAGACATTCGCACAGTTACACCTTAGCCTATTCAACTACTGATATAAAATATGTTGAATTAATAATTTACTTGTCATACAATTTCCATTATTATTATTTTTTTGAAATTCACCATCTACAAGCTTCCATTATTTTTGGTTCAATATAAAATGATAGGATTTGGAAACCGTGCAAGTTTTGTAGGTTGCTCTGTATATAGTCCTCATGTGAGTGTTTCCCCGGAATTCGTGCTAATTTCTCGCTATGGTCGTGATTTTTTTTTTCTGTGATACTTGGTTTGATTCTGGAGATCCAGAATGAGGTACGCAAAACAAAAATAAAAATAAAAAA
>VvCYP76C2a  (576 bp) 
GATTCCTCCAAGGAAGCATGTGACCTGTGTCTCCCTTATGTAAGCGAAAGCATGACCCCAGAGCAGTCCTTTGTTAAATTGTTGTGTGATTTGAGTGATTGTGAGACCCCCTTGCGACTTGGTCTATTTTGGACGTACCCGCCCCCACGCACTGCACTGGTAGTTTGGAATATTCTGTTACTTTAGATCATCAAAAAACACCAGGTCAGTTGAACCCTTGAATTGCCACGTGCCTCTCTCGTGTAAGACTGTCGACACGGTCCTTATTACTTAAATTGCATCAAATTATGGCAATATCACACTGTATCTGGGCGAAAGTGACTTTGATCTTATTTATTTATTGTTAATATGAATATGTATATCAGTATACGTCATTCCCTATTTTCATTTTTCATGGCTCGCAAGTTGTGCCACATATTTTAGGTCCCGTGATTCATGTGAATATGGATGAATCATCTTCATTAAGACACGAACTAGAGTCATACTATCTTAAGCATCAACTAAAGTTGTGTTCTAATAAATATAAATAAAGTCGTATTCATAAAAACATTGATAGAAAATTGTTTTTATGTGAAT
>VvCYP78A7a  (1500 bp)
TACAGCATAGAAATAGAAAAGAAAGAAGATTGACTCAGCGTAGCCAAAGGAGAAGATGATGGACGGTGAGGAGAAAATGTGAGATGGGGGAGTATAAATAGGGGAGCAAGGGGGTTCGATGCTTGGATTCCCGTGGAGCCTGTAAACGAGAGAGATAGATGGAGGGTGGGCTTTGCATGAGAGCATTGAGGGGTTAAAACCTTGAACGGCGCATGTCCATATGTAGAGTTACAGAGAACATTGAATGAGACCCATAGATTCTGACTAGTGAGGGTGAAAACGGCGAGCGAATTTTGGGAATTGATAGTGAGAGGGAGAGGGAGAGAGAAAGAGGAGAGAGAGTGAGCTGCTGAGCGATCTGGACGGCCAGGGGCAATACTTGCTGTTCAAGGAACGCATTGAGAGCTGTGACGGGTTGGGTGTATTAATAAGAGACTGAACAGCTGAGCCAGAAAGAGACTGAGATAGGGTTGGGTGTATTAATGTCAAAGCTGAGAATAACTTTTTGCTACATAATCTTATATAAACTCTCACAATAATATATTCAAAGATTTTTTTTTTAAATCTATTATTTCGTTTTTCAATTTACCCGGTTTCCCACTTATCTTACCATTTCGCTAAAACCTTATTCGACACAGTTTTTAAATCTAAATTAATTAATTCATATTTAAAAATAATTTTATCGAGAATCTAATTCTAAAAAATTGTCTTATTACGAGCCTTTTAAGGTAAGGCTCAGTGAAAAATAAAACTTCAAAATTTATTCTCATATTAGTTTTGTTCTTACCATTTTCCCATTATCATGGTACATGAAAAGCAAAAAAAAAAATTATTTATAAATATCCGTAAAGTGTTTATATTTTTTTATATAAAAAAATATAAATAATTTTATAAATATTATAGATCAAAAACAAGATAAACGTCTATGAAATAAAAACATTCATTAGGATATAGATGTGTAAAATATTCTCATCTTTATGGAGTTAGACGTAGCTGAATAATTATGTTTAAACCTCGTATGATTTTACATGTGTTAATAATTTAATTTTTTGTTAAACATGCCTACAAAAGCCTTTGTTGAAAATATTTAAATTTGAAGATTTTAGAAAGAGTAAAGAAAATGTAAAAGCTAATTGTAAAAAGAATTTTTAATTAAAAGTAAAAATGAAATTTTATCATTTTTATTAATTGAATATTTATAATTTTGAATTACCAACATATAGGTTTGAATACATTTTTTTTTTAATTTTAAAATTAATTTTGGATAAAATATAAAAACTCTTAAAAACTTCCATTAAAAAATAAACAAATTTAAAAACTATTTAGAAAAATTGATGTGTACAATTTTTTACAACTTCAAAATTTTTTTTTTTTTAAATCTACAAACATAAAATAAACATATTTTTCTGTAGAGTTTTTACCATTTATATAAAAATTATTAGTATTTTCATGGTTTTTAAAACTATATATAAAAAAAAGAGCTACACATCAAATTTAAAA
>VvCYP78A10b  (1500 bp)
TACGCCATCTTATGATCATACCATGTGTGTTGTCTGATCCTAATTTCCCCATTTTACCCCTTCCTACTTATTCCTCAAATTTTTATGAAAAAAAAATTGTCTTTTAAGTCATTAAATTATTTTATTTGAACCCTTTGTTTGTTGAAAATGGCTTTTTTTTTTTTACAATATTTTGTTTATTTATTTAAGTATGATTAAGAAAAAAGATTATTCAAACATAGAAACTTATTACTTGACTTGGATAAAAAAAATTATAGCTTAATTTATCTATAAGCAGTGCGAGTCTATTTTTAAAATATTTTTATTAAAGATAAAAATAAATAAGGTATTTTAAATTAATTGAGAATTGTAGGCTTCGTAATTAAAAATGATATAAAAGACATAAATGGGGGATAAAGGGAGGGTAGAATAGGAAATATAGGAGAGGCAGTGGAGAAATGTGTACCGTGAAAAGCGCTGTCACACAAAAATTAACCCTGTATGAACGCCGCGTGTACAGATGCGAAATAAATAGCTTTGGTACGCGGGTAGGAGGAGTTGTCACCATCATGTCCACACTCAGCATGTACCGCCACGTGGCATCCCCTCAATAACCCTTCATTTGTTGTTATTCACCCTCCGTCTCTCCCATACTCCCCAAAATCAGTGTATGCGCCATGAGTGCATGGGCCTCCTGTGCACCCACCCTTATGACCCGACAACATCCAGCCACAGGACCCCCACGTGTCGAATTCACACACATGTAATTTACTCCTCCATGTTAATTTGTCTCTCCCTCTCCATCACGCGCTTGCTCCCCCGTCCGCGCGTCCCTCCCTACTCTTGTACTTTATTATTTGTATTGGTTTTTGGTAATTGGGTCGAATTTCCTTAAACCTCCGTCCTTGTGTGCGAGAAATACTTGCCTTGTCCGTCAAGCTTAAGTTTAAAACTATTATTGATTTATAATAAATTTTTAATTAAAATATTATTGATAAAAGCATTTTCGCAAAATATTTCTTACGTCAAACTTAAAAATAAAAACAAGTGAGGGAGTGATTAGTTGAAAGTAAAAACAAAATGTAGAATTTTTTTAAGAAATAAAGAAATTCAACCCCTAATAAATACAACAGACAAGATGCAGAAAAAAGTGTACAATAATTGTGGGAGTCACTCTCCACTAAATGAATATGGGAGTACGGTCGGGTCTGAAGACATAGTAAACGTAAGCAAGACAGAGCCTAGGAGCACATGATCTCATCTGATTGGCTCGTCCAATCCACGCGCCGTACTGTCTCTCACTCACACCTTTCCCACCATTCCTCTTGCTTTCGTGACGGCGCAGCATAGTTTTTTTCTCTTTATTATTTCCATATATATTTTCAGTTATACGGTCCTACTTCTCGGTATAACGGTTATTTTTAAGCTTCACTATATAAACCCTTACTCCCTCCCTAGTTTTTGCCCCAAAAGCAAAGCCTCCTCTTCTTCTTCTTCTAGCGTGACTGTGCTGCAACCCAT
>VvCYP78A10c  (1500 bp)
TTTCACAAGGTAGAGCCGTAGAGCTCCCCGGGAGAGACACCAAGGGAAGAGGATAGAGAAACGAAAGAGAGAGAAGTAGAGAAGTTGCAGGAGACGAAGTGCGTGGCGAGGGCGGTTAAATAGAAGTTGGAATGGCGTTCAAAAAAAACAAAACGAAAAAAGAAAAGCTTAAAAAATTAACCTCGGTTAAAATGGAGTTTTTCCTTCCTATTTTTTTCACCGTAGTTAGTAAAGACTGTTTTGACCCTGATGGGGGTCCTCTAACCACCATTTGCTTTTTCTGCGAATCAACTTTGGGATTTGGACCGTCTTTTTCAATCAAATTAACGATTCTGCCACCACCCGGTGCCAAGTTGTTATTTTGGGCTGTCCACCACCCCAAAGAAAAATGGGCCCATCCTGGGGACAGAGTAACGACACAGAAGTGCTTGCCGGCTTCAAATGGGTCCCATTTTGGATGTGAATGATGTCAATTTCAACCTGGTAAGAAAATCTCAGCCATTGCATCCTTTCCTTTTTTGTCCCCACTTTATAATCGGAGTTTCTTGAACAAAAGTGATGTTTAAAAAAATTATATATGATAAGACGAATCGTATGGTTTTGAAAGCAAGGGTATCTTTGGTAAACATTTGAAAATCGAAAGACTACCTAAAGTTGTTTTTTTCTTAAATTATTTTAAAAAATAATTATATAAGTATATATTACATTTAAAACTAAAGTCTTAAACATAAAAAATTATTTTTTAAAATATTAAAAATATATCAAAATTTTAAACAAACTTTCATTTTATAAAATATAAAAAAATTATTTTTAAAACTATTTTAAAAAACAATTATAAGATAAAACCTAATTATCAATGTAATGCTACGTAAAGATGAGAAATTTTTTTTGTAATATCATAACATCCACGTCACATCTTCCATGCGACCCCTTTTTTTTTTCAAATATTCAAGATTTTGCAAAATCAAATTTCAAAAGATGAATCATATGATTATTCCTCCTTATAATGTTTTTAATGCGAGAATGATTCTCGATGAGGTGAGGTAATTAACGAGTCATGTGTGATTCAATCAAATAATTGGAATCATTCCTTGTTGTAATTGACCGGTGCCATCATAAAAAGTGAAAGAGAAATGTGGTGTGAAAGTGAACGACAAATAGGACGATCTAGCTTCAAAGATATGCATTCTTTAAATATGACAATAATGTTGAAAAAAATCCCCGGTATGATCAAACTATAGACAATAGAAAATAATAAAATCCACATCATCATTATAAAATTTTCTTCCACCTTCATTAAACACAACTTGTACTTTAAAATTTGCATGTTGCATTTAAAAAAAGCTAAGACGCAACATGAAAGATATGCAAATATCATAAAAGTAGAACCAAGGTTCCATCTTGGACCACCCATTTGGATTGTTCTTTGCTCTTTCAAGTTTCATGGCTCTACCATCCTTCATCTCAACGCATTTCTCTATTGCTCTAGATGGAAGTTGG
>VvCYP79A2b  (1500 bp)
ACTTATATCGTTTTGTGGCCCACATACTATAATGCCCAACATACATTAAGGCAAATGTGGGCCCTCCACAATACACACATCACCTCAAGTTTGATCCTTCGCAAAACTTAATTTATATATATAATCCCAATTTCGAAAATCTAACTCATCATTTAATATATATATATATATATATATTATATGAGATTAGAAAATCTCTCTATTCCCACCACACCATTGACACAACTTTTATTTATATTTGATTTGTTATATATAAGATATGATATAACAAGAAATGTATAATACATGCATTCGATCTCATGTAAATTCAATCAAATAATTTATCCCACCTCATTTTTAGTTAAATTTTCAATTAAAATATAGAATATTCAAATATTATACAATCAATCGTTGTCTTAAACATTGGCAAAGTCGGAGATTTTTGCTAGGGGGCTTCAAAGAAAAATATTATATTATAGTCATCATTCATAAATTGTAAGGTAATAATAGTATTTTATATTATTACTAAAAAATTAAATAATTTTAAATATTAATTATGAAAATGTATCAAATTAAATGACCATGGTACTAAGAACACTTAAAAAAAGTTTTAAATTTTATATTAAAAAACATTATTAAGAATATTTAAAGGAAAATTCAAAAGAATTCAAAAATAGAAAAAAAAATCATTAGAAATTTTCAACGCTTTTAATCATTTTGTAGCAAAAACCTTTAAAAATTATTTTAAAGAATTCAATAATTTATGATATAGATATTTTTTAAAGGAAAGAAATGTGTTCCTTTAGTTTGATTGTTTTATAACTTAATCTCATTTATTTATACATTAGTCTCAGTTTTTATAGTTACATTTAAAAAGTTAGATTTTTCCATATATTTTCAAAAGTCGATATTAAGATTTCCATAGATACCAAACCAATACTTTGATTTTTTTTTTCTTTTTTTTTTAAATAACTATATATAAGATAGTTGAAAGTAAAGTAAAAATACAACTCGGGTTTTAAATTGAAAAAATTCCTCCATATAGATATATGAAAATACTCTTTAAAAAACTCTCTAAAAAAATGGTATTCTTATTTAGAAAGTGAGAGGTGACTTGCCTTTTAGGCTATTAACACAATCCCAATAAGACTTTACTTGTAATTATAATATGACTCAAAGTGGAAGGGGTTCTACTTATAAATGAAATGAGACTCTACTAACACATTGTCAATAGAACTTTTTCTAAAAATATAAGACTAATAAAATAAAATAAAAATAATTTTTAATAGGATTCTTCCCAAAAATATAAAATTTATTTACATTCTTTCTACTAATATCTGATGTCGCTTTTATGAACCTGGACACATTTTACGTGCCCCATTAAAATTACTAAACTAAGAAATATTCATCAAACTTATTTGGACTATGCGTGAGGATTTTAAATAGGATAAAATCGGAAACATGTGCGTCCAGGTCAGAGAAAGCACATGCATGGCTAGGCTATACAAGACGTGTGTGTAA
>VvCYP79A2e  (1500 bp)
ACATTTGCTCTCTCTCTTTAGGCAAATGGACTTCCACTAGACAGGCCTTTCATACTTCCCATCAATGGTAGGATTACTCCTCTTGTACGGTCAAAATCATGTTAGATTTTGGTCCAACAGACAGGGTGGCATGGTCTGGTAGGATAAATTGGTATAATATTTAGGGAAATACGGTCGACCCATATCCAAACAATTGAATTTGATAATGTAATCTCTTGTCAGTGATCTTAAGAGGATAAAGTTTGTTCCAACCCAATAAAAAAAAATGGCTCCATTTTGTGACACATGGTAAATGTGAAGGTGTAGAACCATGTAGTTTGGATCCCTCCTAATCCTAATCCTAATCCTAATCCTAATCCTAACACCCATTAAAAAAAATCCCATCACTTTTTTGGACACATACAACAAATGTGAAGGTACATTCTCCCACATTATTATTATTTTCTTCCAAGTGGCGTACGTTGATTTTAGGGAGGAAACTTTTTATGAAAAGACCATTGTCTCTCCATGAAAAGAAAAACATTTTAATTAATCTCTTACTATTACTTGCAATAAAGATGTGATAATATTACAAGTCCTTTGGATGGCAATAAATATGTTGTCACACATCGAGTGAAAACGACTCGTGTAGTTTAAAAAATAGCCATTTTTAAAAATAATTTTAAAAATTAGTTTTCAATTATTTTCAAGAATAAAATTTTATTTTAAAACTCAAACATAAGTTAATATAATTTTCTCAATTTATTCTTACGCCGAATATAAATATTTTTGAAATATTTTTAATTTTCTAATCTTAATGCATAAAACCTATGAAAAATAGCTAAAAACATCTTTTTTTTTTTTCATAACAAATTTGAAAAAACTAATTTCAATTAAACTTTTGCAAACATAACTTTTAAATTTGAAAACATTTTTCTATTCATACTAAATACACCCATAACTTTTACTTTAGTTGTTTTAAAAGGTGTTATCAATTAAATCAAAAAAAAGATTTTCCTTCTCTTTTTGATAATTTTTTTGCTTCTTCAAGGTCTTTGAGAAGTAGCTTTTTGTGTCAACATTTTCCAATCTTCTCTAGACTCTAGCATTCATAGAGCTAATAGAAAAAATTTATTATCCATCACCTAATAATTGAGTTTGTTTAATTTTATTCAATTTGACAATTAAAGAAATTTATCATAAAGTTTAAATATTGTGTGTTAAAATATCGAGTTTTCTTTATAATTCTCGATAATTTTATTTCTATTCATATTAGCTCAAGAAGCTTTTTATATAGTGAGTTACTCTCTACTAAAGATTCGATGTTATCGTTGGCTTAATGAAAAAAAAAAAAAAAAACTTAAGCCTAAAAGGATTTGTTTCGTGAAGCGATTAAAATGTTAAAATGAACCATATAGCGCCCGTTCAACCCTACCCCCACCCTCGATGTTGCCCTGTTGGACAAGACGTTTTTTCATTGAATTCATAAAAATCTGCGGGGCCATGTTTTGACACACAATA
>VvCYP79A2h  (1500 bp)
GGTTGAGTTGCAGCTGCTACCCATCATCATTTGTCTCTTGCTGATCTTCAGTACTAGGATGCATGAGAAACCTCCCATACATTTGCTCTCTCTTTATAGGCAAATGGACTTCCACCATGCACGCCTTTCATACTTCCACAGTTCCACATGCAACAAAAATGTGATTCTCATCCACGGTAGGATTACTCCTCTCGTACAGTCAAAATTATGTTAGGTTTTGGTAAAACAGACAAGGGACGGGCGGCATGGTCTGGTAGGATAGGGACATGTGGTCGATCCATATCCTAACAATTGAATCTCTTCAACCTTAATCAATTTGATGATGTAATCTCTTCTCAGTGATCTTAAGGGAATAAAATTTGTTCTAACTCAATAAAAAAAATGGCTCCATTTTGTGACACAGTGTAAATGTGAAGGTGCAGAACCATGTAGTTTGGGTCCCTCCTAATCCCAATCCTAAGACCCATTAAAAAAAATCCCACCACTGTTTTGGACACATACAACAAATGTGAAGGTACATTCTCCCACATTCTTTCTTCCAATCCTCTGTAACGTTTGACAAACTTTTTATGAAGAAACCATTGTCTCTTTATGAAAAGAAAGAAATTTTAATCACTTACCATTACTTGCACTAAAAATGTGATCAATTCTCATCAAAGATACGACAACTCCTTTGGATGGCAATAAATATACTGCCACACCTAGAGGGAAAACGACTTGTGTGGTTGAAAAAATAACAATTTTTTAAAATTATTTTCAAGAATAAAATTTAAGTTGAGAACTCAAATATGAATTAAAATAATTTTCTCGATTTATTCTTCGTAAAGTACTGTACATTTATGTTGAATATAAGCATTTTTGAAATATTTTCAATTGTTTAATTTTAATGCACAGAAAACCTATAAAAAAGTAGTTGAAAACATTTTTTTTAAAATTAATCTATTTTCATAACAAATTTGAAAAAAAAAAATTAATTTCAATTAAACTTTTGCAATTATAATTTTTAAATTTGAAACCATTTTTTTTTTCACACTAAATATACCCATAACTTCTACTTTAGTTGTTTTGGATGGTGTTGCCAATTAAACTGGTTTCAAATTATGGGTGTATTTAGTATGAATAGAAAAATGGTTTCAAATTTAAAAATTATATTTGCAAAATTTTAATTGAAATCATTTTTTTTTCAAATTTGTTATGAAAATAGATTAATTAAAAAAAAATGTTTTCAACTACTTTTTTTATAGGTTTTCTGCTCATTAAGATTAAACAATTGAAAATATTTCAAAAATATTTATATTCAACATAAATGTACTGTATTTTACAAAATTATTTTAATTCATATTTGAGTTCTCAACTTAAATTTTATTCTTGAAAATAATTGAAAATTATTTTAAAAAATTGCTATTATTTCAACCACACAAGTCGTTTTCCCTCTAGGTGTGACGGTATATTTCTTTATTTTCTTGATAATTTTTTGCTTTTCCAAGGTCTTTCAAAAGT
>VvCYP79A2i  (1500 bp)
TTAAAGATTTTACAATGGTTCAACACAAGATTGATCTAAATTCAAAAGAAACAAAGGGAGTTTTTTTTTTTTTGAAATTTTTAAGTGGTTGTCATCATTTTCCATTAAAGAAATAAATATGATGAGGTTGAAGCTCACTATAGTGGAAGACTTTTGTGTAACTAAGAGGGATAATTAAGAAGACTCAAAAACTAGAATATTTAATAATTTTAAGAATTTCTTCAATTTTATATCTCAAAGTTGCTTCCTTGGTCACCAACTTTTAACTTTAATTGGATTGGCCTCTATTAAAAGATCTAATGCACAACAACTAACTTTTGTGGATATTTAATTTTTAATTTTTATAATTTTATTTTTGTTGTGAAGATTAACCAAAGTAGTTTTTGTTATTGTTAATTCATTATGTTATTCTAGATTGTTTTTTAAGGCCAATTTTGATTCCATGCTAATTTATTTAGATTGTCTATCCAATGGGATTGATTGTCACATCTATTTCACATTCTAGCACGATTAATAAAACAATATTAAGCAACTGTGTAGTTTATTAATAGAAATATTAATAAATTAACTTCTATCTCAAGTCTAAACTAATAATAGTTTGCATTGGTTTGAAAATTGAAAATTATACAAATTAAAATTTCTGTTAGACTAAATTAAGAGTGTGTTTGACAATGATAGAAAGTATTTTTAATTTTTCAAAAATATTAAATGTTAGAAAATACTTGAAAATTTTTATCTTTTAAATATTAAAAATGTTAGAAAGATTTATAAAATCACTATCAAATACACTTTAAAAAACATATAGTTTGAATGGCCAAACACATGTAGAAAACTGGATGTAGGGGATAAGCTTGACGGGATTTCATTGTATTCATTTTATAAGAGAATGAAGTTCTAGAAATGAGACACCAATTCAAAATTGGGCAGCCTATACAAAAATTGTGTCCTCAGTGTGAGTTGGAAAAAAGACAAGAAACTTTGGCATAGGTAAACTAATGTGCTAGGCATGAGTCTTTGCGTACCGGCCCCAGAAACATTACAATTGAGCTTGATGGGAGCTGAAGTGTTTCCATTAAAATTTGTTGTGCGCAATTGTTGAGAAGATAGCCTGGTTGCTGAAGATTCCTATGAGCATTGCTGGAGATTTTGATGACATCAAGAAAAAATTGTTGGGTGCATTCTTACCTTCCAGTTTTGCTTATCTGAAGAATGGTGTTATATTTGCAGGTTGATCCTGTGTGTTAGGATTCAATACGATAAAAGAGTTCATTTTTTTGCTCTCTGGATGTGCTTTAATGGCTTTCAGAACCTCTTCGTAGTGGAATTGAGAGCTTGGTACGTTAAATCGGTGCCACGCCAGCACTAGCTTTGATTAAAAAATTTGATGCAGGCGTCTTAAGGCCAGTCCAATCCATGCCAAGCCCCAAATGTGTATAAACAGGGAGAATTCAATTTGCTCCCCATTTTCGGTGTGGGATTAACTTGAACCCTGGATGCAAT
>VvCYP81D1a  (1500 bp)
GTTNNNNNNNNNNNNNNNNNNNNNNNNNNNNNNNNNNNNNNNNNNNNNNNNNNNNNNNNNNNNNNNNNNNNNNNNNNNNNNNNNNNNNNNNNNNNNNNNNNNNGATCCGAATCGGAGGGAGAAGATTGGACCGTACTTTAGTGAAAGGCGTTGTAGATATCGATGGACCGGTTGTTTGAGGAGGTGGAGATGACCTATAATTGGAACTGCAGGCGGGCTCCGTGGGAGATTCCCATATCTTCTTCTTGGGAACAAAATTCCGATAACAAGCAAGAGAAAGACGAAGAGAAGAGAGAGATATGAGTGAAGTGAAGACACTTCCATGGTAGTGTCTTCGAAGGAGTGAAAGGAAAGGTAGGCTTAGATACAAGTTATATCCTTGGATCAAAGGTACAACTAAAAAAAAAAAAAAGAAAAAAAAAAGGTTTTTTAATAACTTTCGTACACTTCGACAGTAATTTTTGAAAAAAAAAAAAAAGTCTCAACCATCGTACTTTCCTCATTTTGTTTTTTCTGACATAACAAGTCAAAAACATCATAATGATTTTTTCTAACATAAGCTTTACACATGGAATCCATGCCACATTATTCTTCTTTTTTTATTTTTCCTGGTTTTGCATTCTAGCTTTTAATTTTTAATTTCAATTTTTGCACTCTTCCATCTTTTTATTTTAATTATCTATAAATATTTTAAACATAAATTAATTATAATAATAATAATAATATATAATAAATAATTAATATAAAAATAAATATATAATGAACAAATTTAACTTTTTTTTATTTATGGGTATTTGATTTCATCTGATTTTAATATTTTTCTTAGTTAAAATATTTAATATTTTTAATTAAAAAGGCAAAAATTTTGATTGTGATTCTAATATTTTGTTTTGTTAAAATTTTTAATTTATATAAAATAATATATATATTTGATAAAAATTATATTTAATCTTTTATGTTAATTTTCTCTTAATTATATTAAAAATAAAATAAAATAATCTATATTAAAATTACATATCATCAACACGTACTACTTTTTATAAAAAAAAAAAGTAATATTAAAAGTAATGTATTTTTATAATATTTTTAACATATTTTAATATTTTTTTATTATACACCTAAAATTTATTCCAAAATTATTTTTATAATAATTTTGAATTTAATTTTATTCTTAAATTTAAATACATACCTTCTTTAATTCTTAGTTTTTATTATTATATTATTATTTTTTTCTTTTTCTTTTTTTCTTTTTTCTCTCCCTTCCCACTTATCCCACCTACCCTACCCACTCATTCCTCTCTCTCTCTTCCCAACTCCCACTCCCATGGCAGGCTCCGGACTCTCTTCTCCCATCTTCTTTCCCTTTCCCATTTCCTTTTTCCTTTACCATAATAGTGTTTTCAACCCATATAGGATTCATAATTAAGAAAAAGTCATCCAATCACCCATAATTAATAATAAGGATATGAGATAGTAATTAACAAAAATACTCACTTCACT
>VvCYP81D1h  (1500 bp)
ACGAGAAGTATACATCAATGGAAAAAATAAATTAACACCTAACTTAAAAATTTGTATAGTTTTGGAAGTATCATGCCAAGTTAAAATAACCTAATTAAAAAAATTGTAGACAAAGATTGCTGATTTCGTCGGTCTTTGTAAATCTGATAGCATGAGGTGACATCTTGACCTACACCCATTTACAAATAAATGTTCAACTAATATTGGCTCTATCCTCAGCAACCTAATAGTTAAAATAAAGAAAAAGAGAACAGTGGTGTCATCCATCTAATCTCAAATATCCACTTTCGCCTTCTACCCAAATAGAAATTAGATATAATTATTAGGTTAGAAACATCTCATATATATTAATTCCAACTTTCATCTACACCTTAATAAAGAAATCCTTCATTCTATCGAATGTTTTTGATACATCCTTACATTTCTTTCTACCTCGTATTATATTTATGAGATCATTATCTTCATCTCATATCTTTTTCCACTCATAACTTAAAATATCAAACCTACCATACAACTAAAATAATAAAAAAACCCCATCAATGAGGTCTCATTTCAAACAAATTGGAATGGCAGATGTATTCTATTATTGGTGGGCCTCAGAGGAATTTTAACATTTCAGCATTGGACCTACTATGCAGCCAAGTCGTCATGCTATCATTTAAGAAAGCTCTTGCTGCAATCTGCTTATGGAAGAGGAGCTGAACTCCACTGCTTACACTGCCTAATAACCAGTTGGTGGCATTGAGATTCTTCACAAAAGATGGGCAAGATCTAGAAGATAATAGTACTGCTCATTGAGATTTACACAAAAAGAAAAAAGAAAAAGAAATGAAGATAAAAAAGGGAAAATTGGGATTCTTCCTTTTTATAATTGGTACAAATGAATAAAATACAATTTCATGGATCACGAAGCGAAACAAAACCACATATGCTTTTTTGCATGTTGACAATCTAGAACACCTAAGCAAAGATATATCATAAACAAATTTTGGCTTTATCAGGACTCTTAACAGCCTTCAGATCTGAACCCAGAACCCATCTTTCTCTTATGTTTGTCATCAACACAACCATGGAAATTACATGGCTAAGCACATCTCTATGAATTCTCTTTCTCTTGTTTGCTTTCAATATCTTCCTCCAAAGAAGAAGAATACATCCCCACCTCCCACCAAGCCCGCCTGCTATTCCGATTCCTGGTCACCTCCATCTCCTCCTTAAACCACCATTCATTGGCAATTACAGAATCTTTCTAAAAAATATGGTCCATCTTTTCCCTTCGCTTCGGATCCATGCAGTCCTGTTGTTATCATATCCTCTCCGTCCATTGTTGAAGAATGTTTCACCAAGAACGACATCATTTTTGCCAACCGGCCTCGCTGGCTGATTGGCAAGTACATAGGCTACAACTACACCACTATTGCTTCAGCATCATATGGTGAACACTGGCGCAATCTCCGCCGCCTCAGCGCACTGGAAATCTTCTCCTCAAATCGCCTCAAC
>VvCYP81D1i  (1500 bp)
TTTGCCAAAAGAATAATGCTATTCAAACCTAAATTGGCCAGTTTGCTTCTTAGAAAAGACACTGATCAGCATAAATGGTTCTATTTTTGTTTAAAAAAAATTAGGTCATATGCCATTAAGCATGCAAGAGAGGCAAGCCAACAAAAGTTGGGAAATCAAGCAATTTTCTTTCAAGATATTTGAATGCTGCATATTCAGTTTTATTTTCTTTGACAATACAATTTTGCAGATGTGAGGAATTACAGAGTGAAAAAAAAAAAAGTATATCAAACGCAACTAGTATTTGGAGTATGAAATTTCCAATTTTTTTTTTTTTGAGTATTTATATTAATGTTGGTGTCACATGTGGGTTAATTTTTCTCAAAGCTACAAATATTGTATGCAGATCTTAATTCTTGTTGGTACTGAGACTACTGCAACAACAATAGAATGAGCCATGTCTCTTCTACTCAATCATCCTGATGTTATGAAGAAAGCTAGAGTAGTAGAATTGGACACTCATGACAGAAAAGACTGTTTGATGGAAGAATCCGATTTCCCCAAATTACAATATCTTCAAAGTATCATTTCTGAAACTTTAAGATTATTTCCAGCAGCCCCAGTTTTGGTACCACATATGTCTTCAGATAATTGCCAAATAGGAGGATTTAAACAAGCAAGGCATTATCAACAAGCAAGGCAGAAGGTGAAGAAGAAACCCAACTCCCCAACTCCATCATTTTTGTCAAGATGATCACCACATCAAAGCTTCTCCTTCATCAGTTAGCCTCTTAAGTAGCCAACTTCCCACAACATCATTGAAGAAGAGGGCTAATCTATTAATCAATTCAAATCAAAACATTGGTTTGCCTTTTCAAAATTAAATAGAGTGATTGTATATACATTCATTCTCCAAATTCCTTCGACTTACCTTGTTGGATAAATTTTGTGATAGCTTCTATAAAAAATAAGACTAATTATAATAGATTATATGCATAATTTAATTTTATTACTTGCGTCTAATTTATATTTTAGTCCGTTCTTTTGCACGTGGTATCATTTATTTTTATAAGATTTGTTGCTAGATTTTATGTATTTTGGCGTATGAAAATTGTATAAAGCTTGTATAATGATCGAATGAATGATACTTGGCATTCCACCCAAAACCTTGCCTAATTATTCAATGAATGATATTTGGCATTCGGCCGCAACGTTCCCTAACCCTGTTAGGCAAGACGCGTGACAACTGCCATCTCTTACATCTAATCTCCTTCATTGGATTTCCATAAATATTTTTGTCATTGGCACAGTTAAAGATGGATAAGATCACGAGGAAAACAATTTAAAATGTGCAAGTAAAGTAGCTTTTGAATATAAGCTTGCGTGAAGAAAAAAAAAAATTAATGTGGTTGTTTCCACTACGTACTCTAGTGCTTACCTTCAATAGTCAACGTTAAGTTAAGTTTGAATAGCATGTGCATATAACATCTTTCTCTTGATCAATATGTCATCAACAAAACC
>VvCYP81D1j  (1500 bp)
AAATTGTTTATTTTAACATAATATTAAATTCTTGGTCATTGGAAGATGATCATGACTTTGAATTTCATGGTATAATTAAATTTATTTTTCTTAATTTATTAAGTTTCCTTGCAAGGCCAAAAGACTCTAATCCTTCAAAATGGAATCCATCTCGATTTTTGATGTGTAAAATTGACTTAATTTTAAAATAAAAAAATTCATATATGTACAACAATTCCAACAATTGAATCTTTCATCCAAATTATGATATATATTTAAGATTTGATTGAATTTGGATCATTGCATTTGGTCTACGATGGTGACACAAGAATTGTTTAAGAATTTGTTATCGATCAATATATGATCATATTTGATTATGGTGTGAAATGATAGGAACGTACTATTTTGTTCTATTTTTAATCTTTTTGGTTGGTAATGCATATCTTTTTAATCCCCAAAAAAAAAAATTAAATATATGAACATTCATGTCTATCTTCTTATTTCCAAAAACAAAAATATATATATACCTTCACTTTCATATGATAATTAACCACCACATCTAGTGATAAAGTTTTGACCAACATGAATTATAAGATGTGGATCAAAACAATACACGGATGTTTACTCATAGTCATGACGGGTTATAATATACATACTCTATATATATAGCTTAGATTAATTATTAATAATCAAAATCAAATTAAAAATTGTGAGAAAATCAAATCTATACCTTCTAAACCAAATTTATTAGACTTGTATTTAACTTGACATGATCTATTAACTTATATTTAACTTAACATAATTATAATTAATTTTATCATTCTATCATTTCAAAATTATACTTTAATTGGTTTTGTTAAAGAAATGTATCAAAATAAAAATATAATATAGTGCAAAATGTTGCAAGTGGTTAAGATCTGGCTTGGACAATAAGATCTTGTGAGTTAAAGAAGTAATTAGCTCGATCCCATCCCGACATGATTTCGAATCCAAAGTACTCAACATAATTCTAACTAATATTATGTTTTTAAGCTCATATTCAACCAAGTTAGTTGTATGATTCAAAATTGTCTGTACAATATTTTTTAAACATTGCATATTTATACAAAAACTTAAATAGTAAATAAGACAAAATTTGAAGATAGTGATAAAAAAAAATGAATTTATATATCTTTAATGAAAAATTATAATTTAATATGAAAATACATTTAAAAAAAGGAGAAAATAACAAATAAATATTATTATATAAAATAATATGAATTATGAATATTATAAAAATATCAAATTGTTTCTATCAAACTCAAATTGTCAAAACCTTTTCTCAATTCTAATCTTAATTGAGTTTCAATTTTCAATTTTCAATATTAACAAGTTTAACCTAAACTCAATTCAAATATTAAATATTAAAAATAATCCTTTAATTTTGTCCTAAAATTCGGGTCGGGTTAAAGGCTGGGGCTGCGAACCTACCAAGGTTTGATGGTGGCCCTTATATTTACCACATCTACCTTGGATTTTTATA
>VvCYP81D4c  (1500 bp)
CTTAGAAAACCTCCTATCTGTCCATAGAAATGTTAGTTTCACTTTCAACTTCCTCACAACAAAGTTACATGATCATCAGACTTGGCTAAGTATTGGTAAAAGAAAAATGTACATTCAAAAAATAAAAAATTAAACCCAACTTTTAATTTTGTATGGTTTTGGCAGTATCATGCCAAGTCAAAATAAACGGATAAAAATTGTAATATTTATGCCAAAAAAATAACAAGCATTGTTGATTTGGTCATTTTTGTTAGCTCTTCATTCATCAACCTTTAATTCAACAATATATGTTTTAGTCTAGAAAAAAATGCCAATAATTATAATAGAATATTATAATTCTACATCGTACATGTTCACAAGTGGAATTCAATTTAACTTTAATCTTGCATACTCTTATAGGTAATTATGTAAAAATGTTATGGTATCTTATTTCTTAGTCTATGTTTGGTTTCCATAAATAATGAGGAAAAAAAATGTTAAAGTTGGTTTTAATATAAAAAGATACAAAATAAAATCAAATATAATGAAAATTAACTACAAATTTATATATTTTAAAATTATTTAATTTGTATATATTAAAAAAAATAAATGAAATGAGTTTGAAGAACCATATGAAAATAATTTATTAATTTCAAATTTTCTTTTTCTCAAATTTTCTTTCATTCCATTTTCCTTCCTATTTTCTTTCTTTCACATTTTTCCTTAAATTTCCCGAGAACCAAACATAGTCTTATATAAATTAAGGACTGTTTGGTAATTGTTTTCGAAAATAATTTTCTATTCTAAAAATTAAAACCAAGAAAACATGTTTAGCAATTAGAAACTGTTTACTGTTCTTAAAAACAGAAAACAAGGTATTTTAAGATAACAATTTTTAGTTGTTTTATGTTATTTTCACTTGTTTTCTAAGGGTTATTTTAAAAAAGAATTATACAATTATGTAAAATGATTAAAAATAAAACATTGGATAAACATATTAAAAATAAGTTAAAAACATTTCAGGTTTCTAAACGTACTTTTGTTTTACACAATATTAGATGACAGTTTTTAAAAATTATTTTCAAAAATTGTTTTTTATAACTATTTTAGAAAATAATTGCCAAACACGACTGAGTAATCTTATGGATAATTGACCAAAATAACAGATAAACTAAATAGGATGAGGGAATAAATAGTATCATGACCTCGTAAATCTGATAGCATGAGCTATCAATTGACTTGAGAACTTAAATTGTGTAGGAATGGGGCCATAATTTATACCTCTATAACAACCACTAGCCTGCAAACTTATTTTCGTGTCTGTTTTCTACCTAATAATTAATAGATGAAGAAGGAAACACAAATCAATGGAGAAGGATGCTTAATCCAACTTGATCAGCATCCATTAACAAATAATTTTCTACTAACATTGGCTGTGTCATCAGCAACCTAAAAGTTAAAATAAAGGAATAAAACAATGATATTTGGGTCATTAATTGACCTATTTTCCGATATAATATA
>VvCYP81D8  (1500 bp)
AATTGGTATAAAAAACGAGTAGAGAGCAGGATATGCCTTGCAGAAAATATAGACCGGCGGGTTGATGCATGTCAACCGGTCAGCCGAGTCGAATCTTTTGAGCTGGCCAGCATGGTTTAAAGTTAGGATATCAATCATTGATTCGAAGGGTCCTATCTATCTTCATGTCTCAATTCGGTATGAAGTTAGGATATCAATCATTGATTCGAAGGGTCCTATCTATCTTCATGTCTCAATTAGGTAATACATAAAATAAGATAATTAAAAAATTTTAAAAATTATAAAAATATTATATAATTAAATAAACTTAAAAAATTAATAAAAGTAATTTTTTTTTCACATTTAACTCAAAGTTATTTATAATAATACCAAGAATTGTGGATTTAATTCACATTCTATCATATAAATACATTTAATTTATCATTAAATCCTATATTCCATACCATCCTTATAATTTTACTTTAGCAAATTGGGACTCAATTCTCATAATATGTTATCATTAATAAAGCGCATATGTCATACCAAAGGCATTTTTAAATTACCAATTTCAGCTCCCAATCTCCCACCCTTGCACACCACTGTTGTTGCTGTCAAGACCCACAAACGGCAATTTTTAGATTACCAATTTGAGCTCCTCATCTCCCACCCTCGCACACCACTGCTGTTGCTGTCAAGACCCACAACAGCCGACACCAGTTGCTGTCAGGACCCACGACAGACGACACCACTTGCACACCACCGTTGCTGTTGCTGTCAAGACCCACAACAGACGACACCACCTGCAATTATTGCAAATTTGCAACTATGCAAGACCCAACACTGGAGGGGGAGCAATCCGACTGTGAGGAGGTTGCTTTGCCGACGTCGCCCTGGTAAGATTCAGTCCACTTGACGAGTCACCACCGCCGACACCAAAGCTCCATCCTCCGGTAAGTAAATCCTAAATCATGCCCAGTCACCAGTTGTAATATTGCGGCTCTATGGTCTATACCAACATCAACTGATAACTGATAGAGAGACGAAAAGGGAAGACATGGAACGCAGCCTTAGTTTAGGTTTGTCCCAATAAACAATTATTAAGCACTGCACCTACCTTATTATATATAACCGATTAACCTTTTTAAATTCAAGACTACCATGTGGGATTCATGTTGATTTGTTATGGGACAAACAAACTGGGTTGAATACAGACCAAATATCAAAATTTATTTTTCTTTTAATTTTCCTCTCTATTTTCTTTCTAGTGTTAACTTACTTCAATCAGTGTGATGATATTTGCTTTCTTGAATCTAATTTACAGGTTTCCACCATATCGATCTCACTGTCCAATTGGGTGTGCTTACACTTCTTCAATATTAATTTCTACTCATCTTAAGACCCAAAGTGAAGCCAAAAAAAATAGTGGACAAATGGTTCGTAAACCATCTATATAAGTCGATATTAGGAACCATATTCCTCCCACACTCACATAGAAAAATTACAAAGATGGAGACACTGTAC
>VvCYP82C4a  (1500 bp)
TTAGTGTTAGAATTTTGAACACCTCCAACTGTAATATGTGCTGCTGGTGAACGTCAATAACAAAGGCTGTTGAAAGTTGCTCAAGACAAATTTCATGACTTTGTAGCAGATAATGGACTTCTTGTAGAGAGATTGCCTCAGATCTAGATGTAATATTCACAACAATTGTTTCAAATTCTAGTCCTAATCCACCTAAAATGTAAAGAATTAAATCTTCATCTGGTATAGGTTTTCCAGAGGCAGAGAGCATATCTGCTATGTTTCTCATTTTTAGCACATAATCCTTTATGCTTAGAGCACATTTCTTTAATGATTGTAGCATGAAACGTAGTTGAAGAGTTCTTGCCTTTGAATTAGAGACAAAAAGTTTTTAAAAGAACACTCCATACTTTGGCTTATGTTTGACAATTAACCACATGACCATACATGGCTTCATATGGAAGCAAGAATCCAACTCAAAAAGAATTGATCTAAAATCACCCATTGATCATATTCTGGATTGGATGCAGGTTGAGATGAATTAACTGATGTTGATTGAGAGAATCTTGGAGGTTTTGGTAGCTTACCAATGAGAATTTGATCCAATTGATGTGCTCTAGCTGCTGGTAATACCTAAGATCGCCATATTGTGTAATTGTTCATCTCTAGCTTCACCGAGATCGGATGAAGCATAGAAGAACTTTGTCCCTTAAGAATTGAGGAAACTTCCAACGAGTTTCTTGCCGGAGATTGGAGTCCTTGTGAGGACATCTCTGGTGCAGAGAAATCGATGTGATCAATCACCATTTTGGATGTGTGTCAATGGAGCTCTGATACCATGTCTGGTTGAAGAAAAATAAAGAAAACAGGATTGTAGCAGAAAACAGAGTATGAAGAAGAGAAAAAACAGAGTATTAGAAATTCTGGAACTAAAAAACGTGTTCTTGCATTCCACTCTTCATCTGATTGATTTACATATGTTTTTATATCAAAACTTATAGACTTTAACTCTGGTTACCAATTAACCGTAGTTACTAACTGACCATAGTTATAGTTACAGGGGTTAGCTAACTTCCTAACTGAATTTGGTTAGCTTAACAGGCTATGATGATGGCTCGTTTGTCTTTGCTCCTTGTGGACCATATTGGCGTGATGTGCAGAAGCTAGCCATGGCTGAGCTGCTTTCAAACCGCCAACTTGAGATGCACAAGCATGTCCAGGACTCAGAAGTCAAGATCTTAATAAAAGAGCTTTATGGGCAATGGGCAATGGGCAATGGGCAAGCAACAAGGACTCCCCGCTTTGGTGGAGATGAAGGAAAGATTTGGGAACTTGGCACTGAACGTAGTGGTGAGAGCAATTGCTGGGAAACGGTATTTTGGGACCCATGCCTGTGGTGATGAGCCAAAACGGTGCAAAAAGGCCTTTGAGGATTTCATTATTCTAGTGGGGCTGTTCATGGTCTCGGATGCCATCCCTTTTCTCGGCTGGTTGGACACGGTGAGAGGGTTTACCCCTGAA
>VvCYP82C2d  (1500 bp)
CACTACCTTTACTGGATGGACCTAGTCGCTGCCTTTTCCAAGTGAGTACAAATCTTTAATGGAAAGATCCAATTCCGAAATCTGCACATGCTTTAATGCATCGAGGGGACGGGCTGAGAGGATTTCCATCATGGACAGCTTGCGCATCTCACGCCAAAGGGCTCCATAAGGGGCGAAACCAAATCCAGCGTAGTTGTATCCTAAGAGCTTTCCTGCACTGGAACTTGGGCGTGAGGCAAAGACCTTATCATTAGTGGTGAAGCATTCTTTAACAGCCTCACGACTGCTCACCACAAGTGCGCGGTGCACTCCAAGGCGGATCATGAAGACGGGGCCGTGCTTATCAGCCATGGCTCCAAGGGTTCGGAATATTGGGGTTTGGCCTCGTAGTAGAGGAAGGTGACCTAGAAATGGCCAGGCACCAGATGGCTCTGGGGCTGACCTGCCCTTGCTCTTCCCAGCAAGAGTCATAACTCTCCATACACCATACAACAAAACCAACCCCAGAATTCCTGAGATTGCTACTAACTGAGAAGGGGTATCCATGTTGGATTGTCTGAGACTCTGCTGATTCACTATTTAGGTTCAAACTGGTAGCTACAACTTTCCTCTGTCTTCCTCCCTCTAGACTTCTTTTTATTTATTTAAATATTGTTTAATTATTAAATTCATTAATTTCAATAGGAACAGGTCAAGCATCCGTTAACTATAATAATATAATATATCCATGCACAAAGCCCAATAATTGAATATCATACTATTGCAGCATCGAACAGCGTGACCCGGGCCACCCGGCCGGTTCTGGTAGAACCGCTCCCCTTTCCCACCCCCAAAATAAATTAAATAACACCAAACACAGTTTCTTTATGTTACAGAGTATAACTTTGAGTTTTGTGCTAATTCATGCCTCAATTTTTACTTCAAAAAAAATGTCCGGTAAATCAAGTTAATGATTTAATATGAGTTAATAATTTAATTTAAGACATTAAATATATTTAATAAAATAATTTAATATTTTAATTTAAGATTAAAAATACTTTTAAGTATTAAGTTAAAATAGTTAATTTATATCTAATCTTAAATACTTTTTATCTTATTTATCTATATTAATAAGTATATTTTAAATTATAATTCCACATCCATGATTCATTTTTTATAAAAATATTTTATAATTATTTAATATATCTATGATACTTTAAATATGAATATTTTATAAATAAATTTATAACTCAAAATTAATGAGGATAAATATTAGTTAAATTATGTAACGGTATCAATTTGATGATTTAGAATAAATTTTAATTTAACTTTATCAAATAACTTTAATAATTAAAATAAAAAATAAAAAATAAAAATTAAGTTAACAATTTAAGAATAATTTAACTTAAAATTAACTTAAATCATTAAATAATAAGTATTAAGTTTTATCAAATACTCATTTAATCATTAGAAGGGGCATGATTGAGGTAGGCTCTTAATAGGCCTTAGTGCAACAACAAG
>VvCYP82C2e  (1500 bp)
TCCCTTACTCTTGTGAGTAAGAGTCTTACCTCTCCAGTGATTATACCATAACACCAACCCCAGAATAAGCCCTGCAATTGCTAGGAAATGAGAAGGCAAATCCATGTTGGAGTAGAGATTGGGGAATGGTGCTCAACTTAGGATTCACTACCAGACATTTATACTGATTTCCCTTGCTTCAATGTTCAAACTCCAACATGCCCGCTGCCACCAAATTGGAATAATTTTCCGGTCAGGAAATTTTTTCCTCTCACTTGTTTGTCCTTTCTAATTTCCTCTTACAGAGCAATTTCCTCCAACTGCTTTTTCAATGCATGTTTTGATTTTTTGACACTAAGCATGGAATATTGCATTCAATTGTGTTATCCAAATAATTTAGCTGTGTTTGATGCTATGTCTAGCTAGTTGCATGCAGAGTTTTTCAAATCACATTAGGTATCGGCAAATCAAATCTGGAGGTTCTATTTTTTATTGAAGAAGCATGCGAGACTGAATAATTTTATATACAATACAAAATTTTCATAGTTGGTGTGCTTGAGAAGGAGTCAAACACCCATTTCTATAATCAAAGGCAAACAGATTTAGAGGAAATGTTACGGTAATGCCTCTGAGTACAAATACCGTTATCTGAAATTAAAGAGGGATTAAAAAAAATGAAGAATTTCTTTTATAAAAGGATCATCAGATTCTTAAACCGCTTACTGAAACTTTTGTCTTCCCAGGATGGCAGCTCAGGTCAAAATTTTTATAGGAACTCCAATGTATTTTACCCATTCTAGTTTCCAAATTATACGCATTTTAGGAAATCTTCAGGATTTAGGGTTGTTCAAATAGAGACGGCTCATCAGGTTTGGAGCTCTATTGGAGATCAACAGTTATTTTCTATAACCCAAAAAAAGTACAAAGAAAAAAAAGAAAAAAAGAAGTCTTATAAACTGACAAACTCCTCTCTTTGAGGAAGGGTGTCATTAGAAGAATTTCTTAACTACTTCAGAGGAATGCGTGATAATTCAGCAGCTGTTAAGATACCGGTGGAATATGTTGATGACTTGGACCCTAAATACAAGGATTTCCGGATTGCCATGCTTGCAAAATCCCACTTATCCATTTTTCAATGAATTTGTCCCAGCCTTACAAGGATCTGAGCAGATGCTGATTAATGATGCTGAAGAGGAAATCAAATTAATCATAAGCAGGTGCCTTTGGGAATGCGATAGCCACCAACATGACAGTCTTCCATTGCCTCGTGTGGTGCTGATAGGGTAGCTAGTGTGTAAAGCCTTAGGCTTTCCTTAATACTAAAGAGTTCATGGACTCCTGATCAACCCATGGGTGAACCAACCTGGAAATTCGATTTATATACCAACAACATCTGCATATGTGTTTTCCTATTTAATTGCTAACTACTATACAGTCATGACTAGGGGTGTTAACATGGTGATGGGGTTGGATATCTGTCAATTCTTTTATTCAACCTAATTATTATTCCTGATAATCGAG
>VvCYP82C3c  (638 bp) 
TATTATATAATTTCAACGATTATGGAGGATCATGTTGCCAATCATTATCAGAAGAAGTGCAGCTTCCTCTATAAAAATAATCATATTTAGCACACGCAAACAAATTTGGAAGGATCTGAAAGTCAAGTCTACGGGCCACCCCTTTACGGCTTTTTCGAAAAAGCACAAATCGATGGTGGTGCCACTTGCCAGCAGTCTGTTTCAATATCTAAATGTTACCTCGGTGAGACTGCTTGACATACTTTTTGTCTCCTACTATCTCATGGAGATCCAGAGCTGGTAAGATAAGAATAGCATCCGAAGCTGCTGGTGCATGGCCAATAATCGGTCACCTCCTCTTAGGTGGGTCACAACTTCCTGGGATTTTTTATAAAATTACGGTAGATTTAAAATTAATTTTTTAAAAATGCAGCATATTAAAAAATATCTTTGAATAATAATAATAAAATGACAAATAATAAAAAGGAAAGAAAGTTGTCTTGTGGCTATAAGAAAGAATAATATAAAAGAGAGAGAAGAGGAGAGGCGGATAGAGAGAAGAGTAGCAGAAAAAAAAAAAGAACGGGAAGGTGCATGCTGCAAATCTTTGGGTGTTCGTATGACGAGCAAAACGAGTTATGTTTTGCGTGAAAGTTAAG
>VvCYP82C4b  (1500 bp)
TCTTATGAAAACTCTAAATGGGGAGTGTATTTGGTACAGATGCATATCATTAAGTGAAAACCCAAAAACAATAGTTTGTTACTTTACTGAATGTAAACATTTGCATCATGTTTTTATTTGGAAGAATGACATGTATTAATTACTTGAATGACGTCAATGGTATGTTTGGATATATTATTAGAGATTGAAATGATTTATTTATTTTGTAAATTTAGAATTGTTTGATATGTTATTTATATAATTGAATAAGAAATGTGATAATTTTGATTAGTTTAATTTTATATGGTTGATTTTTTATTTAATGACTATAATGCATTGTTTTGAAAATTGGATCGGACCAACCGGTTCAATCGCCAACTGGTGATCTTTCCGGTTCCATCCTCTCCTTTAAACCGCTAGATGGTTGAACCGACCACAAACCACTATTGGCAGTTGGACCGATGAACCGCTTGGACCAGGTGGTTTTTCATGAACTGCATGGCTCAATTCCAGCCCAGTCTTCCCCCCATTTTTTCTTTCATCCAAATAGTCCAACCTTCCCCTCCTCTTTTTCATAGGGTCCAAGTGAAAGCCCAATAAGCCCAGCCTTACATCTTAATGGTCTTTAGGCAAAACCTAAACCCATTTAAACCCCTCAATGGGTTGTACCTTTGAACCCATTAGTTACACAAATAGCTTGAATGAACTGTGTTTTACGCGCATATTCACATCCACATCCATGTGGGATTGCTGCTATTTTAAGTCTAAAGAAAAAGCAACGCCACTTAGCTACAACACAATTTGATGCAAGTCTAGAAAATAAAAAAATCAGCATGTGTTTCAAAAAAGATTAATAATATTAAATAAAATAATATAATATTTTCTGAAATTATAAAATTAGTTAAAGTTAAATAATTAAATTTTTACATATTCCATTTAATAAAGTTCAAAATATTAATATATTTATATTTATATTTTGATAATATCAAAGATAAAAAATAAATATTTTTAATTTTTTAATTTATATAATATTATATTTTGACATATAATTGTTTTCTATTGACTTAAATTTTTTAATTCATTTGGGTGTAAAACACCTTACAAAACAATGTGAAAATGTTCACCCCTTTATTTTTATAAAATTTTTAGATACAAATATAGTTTATAAGGAACCATAAGAAAATCAAGAAGTGTTCCAAAAAGCCTTAACAAATAAAAGAAAAATAATAATAATAATTTTTAATTTATATTACCTTTTTGACATGTACTAATTTGAGTTATATGAATTTTTGTAACTTAAATTATATTTTGTTATTTTGTAAAATATTTTTGGAAATATTTTTTACTTAGATTTATGTAGATATTTGGGTTAATTTGGGATTAAATATTGATCTATTCACTGTCAAATTGGATAGGAATAAACTTTAAGGTCAACCCTTTGACCTGATATCACTAGTCGGATTCTGAGTTGCCTTGGGTGTGACTATAATGGATTTTCTTCTCCAATGCCTAAACCCTGTC
>VvCYP84A1b  (1500 bp)
TTTCCATATTGTTAGTAATTAAACCANNNNNNNNNNNNNNNNNNNNNNNNNNNNNNNNNNNNNNNNNNNNNNNNNNNNNNNNNNNNNNNNNNNNNNNNNNNNNNNNNNNNNNNNNNNNNNNNNNNNCAAATCCAAAAATATTAAAAAATTCACAAGGGTACGAAGAATGTGAGGAATCCTCACATTGTTCGTACCCTCCCAATTCTCCACTTCTTTGGAGTTTTTTTAAAATTTTTTGGGACATCATATGGCTTGGATATTGTTTAAATAGGTTCATTACACTTAGGAGGTGGTGAAATGATTTCCGGAAAAATCCAAATCCAAAAATACTAAAAAATTCACAAGGGTACGAAGAATGTGAGGAATCCTCACATTCTTCGTACCCTCCCAATTCTCCACTTCTTTGGACTTTTTAAAATTTTTTGGGACATCATATGGCTTGGATGTTGTTTAAATTAGTTTGTTACACTTGGTAGGTGATCAAATGATATCCGGAAAAATCCAAATCCAAAAATACTAAAAAATTCACACGGGTACGAAGAATGTGAGGAATTCTCATATGCTTCGTACCCTCCAGATTCTCCACTTGTTTGAAGTTTTTAAACTTTTTTGGAACTTAATATGGCTTGGATATTGTTTAAATAAGTTCATTATACTTAGGAGGTGGTCAAATGATTTCCAGAAAAATCCAAAAAGACTCAAAAATTCAGTACATTTTGAGGGTGTGAAATGGATCGAAAAATTCAAAATGGAAATTTACCAAAAAAATATGTGAGGGGTTTGGATTTCCATATTGTTAGTAATTATACATTTTTCGTATTTTCAATATTTCAACCAATTTTTTTGAAAAGCTAAGAAATAATTTAATCATATATTCTCAATTAATAATTAGTACACAACTAATTCAATTTTAATTTAATATATATTTTATAAAATTTAGTTCTAGTTTTCTCATTTTTTTTAACTTCATAAACCAATTATATTGATTTTCACACTTCAAATATTCGTCAAATTTTTGTCAACAAATTATTTGATGTTAAAATAAATTAAATTTACTTTTCCTTAATTTATAAATTATATCACCAAATTCTTTATAATTTTTTTTATTTATTTTAAATTTAATTTTTATGTGGGGTCTAATCACTTTATAGTACAAAAATAAATAAACTCTAATTTATTTTTTCAAAATTTTCTTTATTTTTCTGTTTCATAAAAAAAATTTCCTAAACAAAATAATTACATTAAACAAATTTATAATTGGTTAATGTAATAAATGTAACAATGTGTGTTGCATGGGATTATTTCCCATGGCAACCGGTTGGATGACTTGAAAAAGAGGTTTTGTTTTTTTTTTTCTTTAATTTAGCATGCCATATGTCTCTACCCTATTAGCCCAAAAAAGTGGGTAAAAGTGCTTTTCGGTACCGTAGCAAGACCCTAAAAGCAAATACATCCAGAAGAAAACCGAACAGTACTATTGTCTGCTCTTCCTACGTGTGA
>VvCYP89A2a  (552 bp)
GTTTTGACTGTAGGTCAAAGTGGTGGCCCTTTCACCTTTTTTTTTAAACTTAGATGGTGTTTGTTTTTTTAGTTTTTTATTGAAAATAATTTGTTTGTTTTTCTACTCTTTTATAAATTTTTTACTAAACAGAAAAAATTAAAATATGTAGTTTTTTCTAAATAAAAAAAATAAAATATTGATTTTTTTTTACTTTTTAATACTTAATATAAATAAAATACTATAAAAATAAATAATATAATATTTAACATTATTAACGTTAGAATTAAGTAAAAAAATAAACATATCAAAGTAATAGAAATGTAGAAAAACTTAAGATGCTTTGCCACCCTACCAATCTCTTTCTTTTCTTATATTTGTTATTTATAATAAATTTGTTCAAATTTAGGCATATATTTTAAATCTTACGTGACTAATAATAAAATATATTATATCCATGTCACATTTTGTTGTTATACAGACTTTTATTTTTAATATTTATTTCATGAATTTATTCTTTTTGAGTCCTTTTTACTTCAGAAATGAATGCTTAACATTTCTTTGACAAGTCAA
>VvCYP89A2f  (1500 bp)
TTTCGTGATCAATAAACCAAATGTAACCTCAAATAAAAGGCTCTGCTTATGTGATCTCTCCATCCTCCACGTATGCTTAAGGAAGATATATATGAACGGAATGAAAACACGTAAAGAACAGAAGAGAAAGCAAACAGAGATGTAACATCATAATATTATCATCTCGGGCACTACAACAAATTACAGCAAACAAAGCAATATCGTCACATCATCATAATTGGAATAAAAAACAAAACAAATCTGTGATGTTATCACACTAACTTTGGACCAAGCTAGAAGTAGAACAATGTGTGGATCCTAGAGTTGATTGCCCTACATGTCGTCACTCGTAACTCGTAAGTGCCTTTGTCAAGGCTCCCCTTTTTTTATACATATAAACAGATGTGGCTGAAAAAAATCATATATAGATTCCCTACTGCAAAGCTGAAAGAAGGGTAGCATGTGGAATGGACCCAAATACATTCAAATTATTAGAATTCTGCCATTCCACTTTTGGCAAATGATAGGTCATCCATCGGTTTATCTGTAAAGCTACGCTCTTGACCCCATTTGAAGAAACGGTGCTCATGGAGACCAGCTAAGAAATGTCACAATATTCTTGAACCAGGAGTTTTTCCTTGCAAAATGTGTAATGATTTACAGCCATGGCAATCCGGACCAACAAACTCTGAACTTTCATCATCAATATAGTCTATACATGTGCTTGTACAAAATTGGATTATATACTTTCAGGAACCCGTCTTCGAAATGATTTAGTAAATGATTAGTTAATAGATTTGCCAAAATCAAATAAATGAGAAACAAAAGTTAAGAGCATTTGTGATGTGATTTAAAAACAGTTTTTTATTTTTAAAAATTAGAGAATTGTTTTTAAAAATTACTAACATTGTTGATCGATTGTTTTCTTAAAACAGATTTTAAAAAACAAAAATAAAATAGAAAACAACTTTAGAAAATAAATAAGAAGTTGTTTTTATCAATTTTTTAAAAACAAAAGGAAAACATGGAAAAAAAAACCATAAAAAACAAATAAAATTGAATATGATATCATTCTCTTCACTATCTAATACCAATACTAAAAATTTTCAAATATGATCTTTCTTTAAATTACAGGTGTTTTTCTAAATTTCTTTTAAAATAAAATTAATAAAAGAACAACTTGTCAAACATCCTTATTTTTATAAAACTATAAAACCAATTTTTTATCTTTAACTTAATTAAAAAGAGCTTTTAAAAACAAATTTCAAAAAACATGGTCAAACTAACCCTAACTATTTATATTTATTTGGTAACTCAGTATGTTCTTGTAATGTTTAAGAGCTTTATTATGGGAACACTTTCTTTTTTGCATGTTTGATAAGTTTCATGATCCTTATCTTAATGGTTTAGGTGATGTGGTGGTCTTGGCAATAGCCCATAGTCATTTTATAACCTAATTGAGAATATCAAAATTTAATTTTTCTTTTGCAAGAACTTACATCATTTGAGTCGACAAATCTA
>VvCYP89A2j  (1500 bp)
AAATTTGCTGCCTTAGAATGCTTGCGTTTGGGCATTAAAGGAAGATGTGATCAGTCAAATTTTCATCCACTTTGCACATGAAACAGCTGTTCGGGATTACAGGGGAGCAGAACAAAATGCAATTCATCTATCAAATAAGTGGACAGTTTTCAAAAGCTAGATGGAGTTATAACCCATTTGGCACCACAAGCAACCAGAATGATGTCTAGCAGCAGTTGTAATAGCTCCACGGCTGTGTGAACTCCATCAACCAGAGAAGCCCAATTTACTCTTCAATCTACAAAGTCAATTCAAAGAACTGATCAATACTGGATGATAGCGAATTTAGGGGCCCATCTCATGAACCTCGTGGGATTTTTTTCTCCCTATAATGACAATGATGCACAGCCTACTACAGCCGGTAGTCATTCAAAAATTTTGAAAAATTTCAGCTGGACCATCCTGAAAATATAAGATAAAAAGAATTATTATGTCTGTCCAAGAAGTTTCTTCATCATCACATTCATCCATACAGAAATCTGCTCTGAACAGACATTAAATTATAACTTATCTTTCATATCTTTTTTTCAGCTCTAACAAAATCTTTCCATAGAACATAGGGATTTTCGATGGATCCAAGAAGTTATGGCTCATGAAGAAACAATCAAACCTATATGACCTATATATTCTTTTTCATCTACAAAAGCTTCATCAAGGATGAGGTAGACAACACCATCCCAGGACAGGCTAGAGCAATGAAAAATAATAAAAAATAAGGCCTATGCCATGATTTGACAAAAACTTCAATCAATATTTAGTTTTTTCTGCTATAACGTTAGCATCACCCATAACTCAATGTCCCAACAGTCAGCTGACAGTCAGTAATGCTAAATAAACTGATCATATAAACCCTTACTTTCTTCCATCTTTGTAATTAAAGTAACAATGACATGGGGGCAGAACAATATGCAATTCATCTGTCAACTAAGCCAAAAAGTTCCATTAGCTAGATGGAGTTTATTACCAATTTGGCACCACAAGTAACCAGAACTGCCTTAAAACAGCAGTGGTAGAAGCTTTTGATTAGCCCAGAGCCGTGAATAGAAAACCATGAACCCCATCAACCAGTTAAGCCCAATCCAAGCTTTTGATTGTTGCCACAGTTGTGCGTAGGAAACTATGAACTCCATGGCCAGTGAAGCATAATCTGGTTTTCAATTTACAGAGTCAATTCTAAGAACCAATCAACAGGGACAATAACAATGTTTAGGATACAAACAAAAGGCAACAAGCAAAATAGGATACTAATTAATTATAATATGTAATTGATATGTAGATAAATAGGCCACATGTGTATGTCGCTGTCTCTGGAGTCGTGTTTGAGAAAATTAATATACGTCATAGTATTAGCATAGCAATTTATCCCTACCACCCAATATATCTAATCCAGAAAGCAGTAGCACAGCCCAGAAGAAGAGCAAGTTCTTCATCTTAGAGATTGGATTGGATTTGATAACTAAA
>VvCYP89A2k  (1500 bp)
TTTGGTCATCAAATTCTTGATTCTCTCTTCTGGGTTCATTGTGCTACATTGAAAATTCATAGGGAGAATTCTACCGAGGGTTTGTGGATGGATTCCTTGGACCGTTGGATGTGCAAGATGAGATTTGGATAATGAGTTGATTTTGGGTATCAAAGTTTGACCCAAATTCATAGTAGGTCCTATGAATTATTGATCGTTTTGTAGGTAGACTTTTTAAATCGACTCCAAAGACTTTGCAATTCCAGATCAATCCAAATTAATATACACTCAACTCATCTTTGAATTGAGTTGATCTTGTATTTTCTAAATTTTAGATTTAAGGCTTATTTGTCACTTTTTTGTGCATTACTTGTTTCTAGATTATATTTTTAATTTAGGAAAAGTAGGTTTTAATCTATTAATATGAAAATATATAAAAAAAGAATCCAAAAATTTTAAATTCTATATTATCTTTATTTATTTAAAAATAATTTAAAATACTTATATTTTTTAACAAGTCATATAATTATTCCCTAAAATATCATTTTTACTTTCACATCATCAATACCAATTAATAATTAGGCTCCTTTATAATATTTTTCTTTATTTTAGATATATTTATTATTATTATTATTATTTTTCTTTGAAAATAAACTTTTTTTTTCCTTCTCTCCGTCAACCAACATTTCATAGGTAACTCAAACTCATCTACCTTTTAAAAACAACAATATATTAACATTTATTTGTATATATCTTTTGAATTGAAGGTGAAATTAAAAACAAAGAAAATGTTACAAATAATCAAAGTCCTAGAAATTAACCTCAACTTATTCCAATAAAAAAAATCTTAAAGAGACATGAAAAAAATCACAAGTCTTACTCCTAGCAAAATTTAAACTCATCTACAATCCACCATATTATCATTATTTTTAATGGCCACACTCTTCAAACTATTCACCTTTGCTATGGGATGCTTGTTTACAAGAGATAATCCTTCAATCCTTTTCAATCTTTTCTTCCTTACTAATAAGAATTAATTCTATCCCCCAACTTGCAATTTGTTTCAATGTGACCAAGACACTTTATTACGACAATAAAAAATGTTCGACTCTCTTATTTTCTATGGGATAAAAGAATTTCGGTTTAGAATTTTTATTTTTATTTTTATTATAAAAGAATAGTTTGAGTCATTTCCATTACATAGAATGTTCAAAGAAACGAGGCTTGACAAGTTGTTGATGTAAAACACAACTTGACTTTGAATGTTCAAAGAAACGAGGCTTGACAAGTTGTAGAAGTAAAACACAACTTGACTTTGAGTTTCTTCTGTGTTTTTCCAAGTTGTGTTTTACATCCTATCATCCCTTTTCCCCTTCTATATTTATATCCTATCATCTCTCTTCCCCTTTATACCCACCAAGCTCTGATCAAAGGCATCAACATGACCAGTGGTGCAGTACTGCAGGAAGAGCAAGTGAAGCTGTTAGGCTCATGGTATAGTCCATTTGTGAAAAGAGTAGA
>VvCYP89A2l  (1500 bp)
CCAAGGGGTTACTATGGGGCACTGAAAACGAATTTAAAGACGTATGCTAAAGGGACAAAATTGAGGGTTTACACTTAGGTTTGTCACAGGAAACCTATATCAATAAAGTTTTAGAGAGATTTCGGATGAAGGATTGTTCACCTAGTGTTTCCCCTATAGTGAAGGGAGATAAGTTCAATATGAACTAATGCCTGAAAAATGATCTTGAGAGGGAACAAATGAAGAACATTTCATATGCTTCTGCAGTCGGAAGTCTGATGTATGCTCAAGTCTGTACAAGGCCTAACATTGCATTTGCTATTGGAATGTTAGGACGATATCAAAGTAACCTAGGTTTGGACCATTGGAAAGCTGCAAAGAAAGTGATGAGATATTTTCAAGAAACCAAATATTACAAGCTTATGTATAGACGAACAAGCAATTTAGAGGTTGTTGGCTATTCAGATTCAAACTTTGTTGGTTGTGTTGATTCGCGTAAATCAACATCTGGATACATTTTTATATTGGCCGATGGAGCCATATCTTGGAGGAGTGTTAAACAGACCTTGATTGCTACTTCTACTATGGAAGCTGAGTTCATATCTTGTTTTGAGGCTACTTCACATGGTGTATGACTTAAGAGTTTCATTTCTGGGCTTAGAGTTATGGATTCAATATCTAGGCCATTGAGTATATATTGTGACAATTTAGCTGCAGTCTTTATGGCAAAGAACAATAAAAGTGGAAGTCGAAGCAAACACATCGACATTAAGTATCTAGCCATAAGAGAGCATGTTAAAGAAAAGAAAGTGGTTATTGAGTACATTAACATTGAATAGATGATCGCTGATCCTTTGACTAAGGGCATGCCATCGTTGAAATTCAAGGATCATGTAGTGAACATGGGACTTAGTTTCCTTATGTAGTTTCTATTGTACAAACTCTTATTATGATGTTTTTTCATATTGATATGCACATTTATTTAATTTTGAGAAAATTTAACTTCATTGGACCAAGAATGAATATAGGATTTATTCATTAAGTAATATTGCCACATAAAGAATAATATTAAGAAATGAATACACTGTAATACATAGAAGGTAACACTCGTTATATCGAGGACTTATCACCATGATTCATATATTTGCTATTTAATGCGGATAATTGATGGGCTAAGATAGGACATTAGGTTAAAGGTGTGGACCAAGTGGGAGAATGTTATCAGCTACATGCTCACATATGCTCACCACTCTGAAGTGGTCCAACACCTGACCACGTCCTCCACCAGATCTCGTGTCCGCTACGGTTAGGAGCATGTTCCACAAATTGCTCATAGTGGTGGCAAAATCAGGAACAACGTGGTATGATGAGAAGCCACAGTTATATAGATATCTCATAGTCCCGAACTCATCTTTCTGCTATTTTCCCTTCAGTTATACACCATCTCATAAGAGAGATTAGAGCTTGGAAATCAAAGACTTCATCAACTACAATTCGGAAACAATGGTTGGAGGTAAGTAG
>VvCYP93D1a  (1500 bp)
GGAGTTGCTTATATAAGATGAAATAATACTTAAGAATTGGAGGTGGGCAATTGCTATGGTGTTTAGAATTTTTGAAAATCAAGTTTCACCAAATCTTTGAGAAATTACTCAATCCATGGACCTGTACAGTTACAGTCTCATTTTTGTTTTTTTTTTGGAACATTATACTCTGCATTATTCTCTTTACATGAAAGCCGGCGAAGATGGAAACAGACAAAAAAAGGAAAGAGGTGGGGTGGGGAATGGATGTTATTAGCCTTCAATTTGGTCATTGGTAGGTTTTGAAAACGAACAAACCTTCATTAAATTATGAGTTGCTTCCAGAATATATACGTCGTTCGACTCTTATTATATTTGGGAGGATAGAAACGTCTGGATTTTAAGAAGTCTGAATGCTTTGCCGGCAGTGGTGGGGGCTAGGTTGAAAGAGCTTCAATTATAGTATACACGTTGGCACTTGGATCTTATGATTAAATTTCTTGCTTGTCTCAATCTCTTCTACACGGTTGAAATCAGACACAGCCTTTGGTTTTTCTTGAGCCCAAACCAATTAGATTGCAGCAGGATATAGATACATGTTTCTTTAGTTTGGTCCGGTTGACTTATTCTACGTGAGCAAGGATCATCAAAGCGCCCCTCTCATACACGACAATTTCAAAATTCTTTCACTCACCCTCTTATCTTGTTTTAGAATATTCTCGATGTTGCCTGCAATGTGCCTTCCAGATGGTGCCACTGGTAGTAAGATTGCAAATTGAACTGGTCCGGTCTGAAATTTCTGAGACCCAAACCATAGGTATAATCTTTGAAGTTGGACTGGACATATGAAAACCTCTTCAAGAAGGGTTTAAGGCCAAGGATTGAAATCTCCGGAAGCGGAGGAAACGGCAAGAAAGGGAAAACAAATTGAGTCAATGGATAAGGTAAGTAACTAAAAAAAGAGAAGTTATTTGGACACATGAGCCAACACAAGCATCAAATTGTAAAAATGTCCTCTTTGATTTTACTAAAGAACCCTCTTTTTACACTTTTGTCCTTTTTTATTTGTTTCCTCCAAAACCAACATCTTCCCTGTTATTTTATTTGTTATTATTCATAGTCCATTTATCTCTCCAACTCACTTTTTAGTTTTTTTCACTACTTCCTAGAAAGTTGTACTATAACTTCCATCTTTTTCACCTCTATGGCTTGTTTTAACTTACTTTGAAGTTCTTTCTTAATTAATGATACTCTATGAAAACCCTCTTTGATCTCATTGTGACTTAACTCATTCTCTTCATCTCATTTTTCATTCAAGATGTTTAATTAAACCATATTGGATTATGTTTTATTTATAAAGAATATTTTAATTAAGCTTAAATTTTCATTAAAGATGTTTATCTGTGATTAAATTTTATTATAAAAAATAAACTAGGATTAAATTCATTAAGTTCTTAATTATTATCGTCATTTGAGCTATATTGTAGTTAAATTTCATGATGTTGTAGTTTTGGATTTTCA
>VvCYP706A4a (808bp)
ATGCACCCGCTCGCTGCCCAGTGGGTTGGGCGTGTTCACCGGAAACATTGGGCTTTCCCCCAGCCAAACACCCTAATTTAATATTAAAACATTAAACATTGATTTAAATTAAATTTGGGTCGGACAAATACGATGAAGCCACCGGAAGATGCCATTGCCACATTCCATGCATGATGTAATATAATGCCAAACCTTGTCCTGAAGCTGAGTCATTTTCATCAAACCCCATTGCATATTAGGCAGTGGCAACCGCAACACAGAGAACCATATCCTGAACCCTTTAATTTTCCACCTCTTAGGCCTCTCATATAACATGACACCCATCTCACCTTTTCTCGAGAAACAAATAGCCATGTTATCCGATGCGTGGTCATGGTGGTGGGAAAGCACTAATAGCAGCGATGAATTTGCACGAGTGAGCCTTACCTTTGCCTTAATCAGTCTTGTCATCTCTTGGTACGCATGGATGTTCATCAAGAACCGTGGCGGCGCACCACCGCCACCGCCGGGACCGCGCGGTCTCCCACTGCTTGGATACCTTCCGTTCCTGGATCCGGAGCTGCACTCCCACTTCGCCGACCTGGCTCGAGCCCATGGACCCATCCTGAAGCTCCGGCTGGGCTCCAAGGTTGGCATCGTAGTGACCTCACCTTCCCTTGCCCGTGAAGTGCTCAAAGACCACGACACCATCTTCGCCAACCGCGACGTGCCGGATTTGACCAACGCGTTACAATACGGCGGCTTCGACATAGTATGTACCCCGTTCGGGCCAGAGTGGAGGATGTTAAGGAGGGTGTGTGTGCGTGAG
>VvCYP706A1  (1500 bp)
TCCACTGATATAGTGAAGCCATTTAAGCGAAGGGTACATATCTGCAACACAGAAACCTGCTGACAGCTCCACAGCTTCCAAGATAGCTGATACAAATGCATCCTGGCCTCTGAATTTTTTGCCAAAAGCTGACCTTGATGTTATGCCATATGTCAAAGAGAAAATTTTTTCGCTAAGATTGATTGGTGATCCTGCATTCAAAGAGATGCTCCAGATGAGTTTTGAAACCTCCTATTCTCGAATCGATTGGAATGACTTGACGCGCTTTGCACTCAAAAGTTCAATGGTACAAATTTTTCGAAGTTGTCTCCAGTAGTCACCATAAGGAGAAAAAGAAATACTTGTAGCGTTATAATTTATGATAGTAGAAGAAAGAAGAGGAGGCCTTTGAGCAAAAATAGTATCATGGGTTTTCATAACCTCTCTGGCAATTTCTGGTGAAGAAACTACGAGGGCAGAAACTTCACCAAGTTCTAGGTGCATGAAAGGTCCATATTTGCTGGCCAAGCGTTTCAGGGTGTGATGGGGTAGTGAGCCAACAAGTTGGTGCATGTTTCCTATGAGGGGTAGTTTCCATGGTCCTGGGGGCAGCTTTGCGGGTGAGATTTTGGATTTGGACCTTTCCTATTTTGAAAACAATGAACATGGAGAGAAGGAAGGCAAAGAAGGCATAGGAAGAGGGAAGATGGATCTCCATTGGGATAAAGGAGTGTAGAAACTAAGATAACGTGACTGGTTTATTAGCAGAATTGCCTTTTATACCAGTTTTAAACTGGTACAAGTCCTTCCCTATGAAAAATGTTATTGATGAAAAACTCCAGGGATGCTTTCATTTCATATGATGAATGAAAAAAAGGTGAAGAATTTTAGAGCTGTTTTGGCTGTGTTTTTTAAAAATTGTTTTTAAAAATTGTTTTCAAAATAGAGAACCAAAAATAGTTTTCCAGAATTTTTTAAAAACTGAGTGTTTGACAAGATGTTTTAAAATAATAGTTTTTTAAAACAAAAAACAAGAAGTTTGTTTGGATGAAAGAATTTGTATTGTTTTTAAAAATAATGTATTACTTTTAAAAATAATGTATTACTTTTATTTCATAAAAATTTTATAAAATTAATTTATAATAATATGAAATCAAATTCAAGTTAAGTCTTATTAAAAAATAAAAGTTAAATCCACAATTATATACGAGTTAAAGATAAATAATTTTTTTTAATTATGAAACAATTTTTTTTATTGTAGTGAAACAAAAATTTCTATAAGATAAAAATAATTTTAATATTTATTTTTAATACAAGTCAATTAAGTACTTTTATTAATTTTTAAATTTTTTTTTATTTGATCATGATTTCTTTTGTTTTTTTTTAGAAACATTTTTAAAGTTAAAGAATCAAAAAAAGTTTTTTAATGTTTTATAAAACTAAGGATATTTGATAAGTTATTAGTAAAAAAGGATTTTAAAAATAAAAAACAAAAAGACTTGTTCAGGTAAATTGTTTTTT
>VvCYP706A4b  (1500 bp)
TGTTTTGTTTCCCTCAGGAGATACCAATGGTTGGTGTCATTGTTTCTTAAAAACTCTTTCATCGTATTTTACATTATTAATTTATAGTTTTTCTCAATAACTTTTTCATGCATTCTTCATGAATTGAGACAAATTAAAGATGACATTCTTGCCATCTTCTTTAATATTAAGTTGATTTGCCATGTGTTAGTCTTAAGGAGGGTAGGGATGCTTGTTCCATTTGCTCGATCTCCTGTAATTACAGTGGAGCATGACAGATGAATGTGTTCAACCATGTTCTAGAGTTTTAATCATTTTCAATAAAATAAAATCATACATCTTAGGGTACCAATGAGAATGTTGTCCAAACTAGTATTTTCCTATCATATGGGTTAAAATGAAAAATGAAAATGGCGACCGTTCCAAACAAATGGCTTTTGGTATCTCTTGTTTGCAAGTTGCAACAATTATTCATCCATGTCTACTCACTCCAGCGTACGTGTAGGGACCAACAGTTAAGAGGTATTCAACCACATATAGGAACTATTGTTATTATTGCTTGTAGATAAGATTGCATACATTTTCTCCATAATTTAATCTTTGACCATGTTGGGCCATCATCACTTGGATTGACAAACATTTATGTGTTTTTGTAAGAATAGGATCAAATATATGATGATTTGTGAGAAGATAAATAGAAAATTTTCTTTAAAGGGATCATTTCGATGAAAATATTGAATTTTGAAAAATAATTTGAAAATTTAAATTATATCAAAATTGATTTTGAAAATACAATTTTAATATGACGTAATTACATTAAATTTGTGAGATTATAATTTTATAAACTATAGAAAATTTAAAAATATTTTTTTAATTACTATAAATCTTTAAATTATTTATATAACAACCATTTTTTTTACAAATATTTTATACGTTTTTTATATGCCCTCAGATTCACAATTTTGGAGTAACATAATGATGAAAAAAAAAAAGTAGTTCCTCTAGTGGATACTTGGTGGCGTGGCATATGCATATTTTATGTTGATATAAGAATTGCATCATGTGAAACGTTACATTTTCATAAAAATAAAAAATAAAAAATCATATGTTAAACTTATCTTATGGTGTGACATGCCATGTCTGGCCCTTGTCGGTGTTTTTCTTGGTTATTTTAATGGTCATCGACATAAACTAAGCCTTGGCGTGACATGTGTTTTTTATTTTTATTTTTTAAAATTTCTGAATCTTTGACTTTTTCAAGGTTGGGTTTATCTGGACCTCATATTTTATTTTTTATTTTTAAAATACTCGTACATCATTATACCATTCAGCAGAGCACCCAAGTGACTTTACCCAGAGGACTGCGCACTGCTCACATGCATTTCAATCGGCTGCTCAAAATTGCATTCAAATATTACTCTATGTTTTGTCATATATGTTTGGTTTCTGCCACGTGTATAAATCACACAAATTATTTTCATGTTTTATAGGGAGTATTAAAAAAAAAAAGGGAAAACCCTC
>VvCYP706A4d  (1500 bp)
TAAATGATGAATCAAGCCTCCACATGCAAGTCCTGACCCATCTTGAGAAAATTGTGTTTTAAATTATATTGGATAAGGATTCTTAATGTTATATAGGTATGAACTTCTCTTAATTATGTAGACACATTTTTAAGGTGCGAGAGTCTATTAAACCTATAATGAACAATATTGACATGACGGAGAGTGGATCTGTGGACCCCGCATTTTGCTCGACGTGTTCCCACTTGATGGCATGAGTCCTTTTTTTTTACTTATTTGGTGAAAATTTGATTTTTAGAAAAGACTTGGAGTCAACATTTATTTTTGTTTTATTTTTAAAGGGGAAAAACAAAATAAAAAAGAAAAACCCTAAGTGTGACTCCTAAAGGAAAAAAAATATGTCTGTGAAAAACCAAAGTCGAGTCTGAGGGTCAGGTTACTTATTGGGAAGGTAAGGTAAAAATACCATAATACCACTCTAAATCCCTAAAAACGGGTCTCTACTAAATAAGGTGAAGCAAACATGACAATTAACTAAGAAATCAATGGATAACAAAATGATCATAGATCAAAACAAGTCATGATAACTAATAAATAAATAATAAAAAAAAAAGGTGAGAATGAGAGTGTACCTTGCAAGCAGGTAATAAAGCACTATCATGAAATAGAGTTAGTGCGCAATGATAAGTGTAAAATGTCTCACACAAAACCAATTAAAATCAAACAATATCAATTATGCAATTCACTTGAATTATTTTAGAAATAAATGTTATGAATATTGGGTCCCCACTAAAGCCCAATTGATTTTGTATGAATTAATCCCACAAATTCCATTATTTTAGAATTATAAAAAATTTATTCATGTTTATTAAAAATCAAGAGAAACAAAATATTATTTGAAAATCAAAGGAAATTTGTGAAAGTACTTACTTGAAGGGAAAGGTAGTAAGTTTATTAAAAACGAGATTTTTGGTGACCCTAAACCTTAAGGAAATACAGAAAATTGAGGACTTAAAATTATTTGAAAACTTGAGTGAATTTAAAATTATTTGAAAAAAAAAAAAAAACTAGAGTTTAGAAAATTAAATTTGAGAATTGAAATTTTGAAAAATTATTTAAAAATGGGAGTTTTGAAAATTAAATTTGAGAATTGGAATTTTGAAAAATTATTTGTGAATGGAATTTTTAAATTTTGAAAATTAAATTTTAGAATTGGAATTTTGAAAAATTATTTGAAAATAGAAGTTTTTAAAAATTGGAGTTTTGAAAATTGGAGTTTTGAAAATTGGAGTTTTGAAAATTATTTGAAGATTGAAGTTTTGAAAGTTAAAATTGGAAATTGAAATTTTGGAAAATTATTAGAGAATTGAAGTTTTGAAAATTGAAATTTTGAAAAATTATTTGAGAATGAGATTTCTTAAAAATTAAATTTAAAAATTAGAATTTTGGAAAATTATTTGTGAATGAAATTTTTAAAAATTAAAATAAATTTTCAACATACAAGGATAAAGAAACGAGAGG
>VvCYP706A3c  (1500 bp)
TTCTTGGACAAAAACTTTGCGTAGTTTACGCCATTCGGGCTATAATGACTCCAGGCTATGTCTTGCCCCNNNNNNNNNNNNNNNNNNNNNNNNNNNNNNNNNNNNNNNNNNNNNNNNNNNNNNNNNNNNNNNNNNNNNNNNNNNNNNNNNNNNNNNNNNNNNNNNNNNNTATAATGACTCCAGGCTATGTCTTGCCCCCCATATGTGAGGGCTAATGCAGAAATAGGTACATCACGGTTAGCAAAAATCACATCGTGATCTTTGAGAATTTCTTTGGCCACGGAAGACGAGCTTATCACAATGCAAGTCTTGCTGCCTAGCTGAAGCTTGAAAATGGGACCATAGAGTTGGGACAACTTGGAGAAGTACCGATGAAGATCAGGCTCAATGAAGAGAAGGTTTCCCAGCAACGGCAAGCCTCTTGGGCCGGGTGGCAAGGGTGGGAGGCCTCTACTTGCTTTCTTGATGAGCCAGGCATACCAAGAAATGGCAATTGCTGCAGTCGAAAGGGCGGCCACTACTCGAAAAATGGTGTTTTCAGTGAGTCCATCCCACCACCACGACCAGCCTTCAGAGACTAAGTTCACAAGGTTCCTGAGAAGAACTGCAATCATGTTTGCTGAAGAATAGAGCTTGGGAAGAAGTAAAATAGAGGCTCTATATATCATCGAGCTTGGATTATTCCTTTTGCGATTCTTGTAAGTTGATGGCCTAACAAGGACAATTATTATATAAACACAAGCAACTCGCGTACTTACGAGAATCGATACAAATAAATAAAAAAGGAGGTTATTTCTTTAAACTTAATACTTATTATTTAATAATTTAAAATATTGATTTAAAGTTGAATTATGTTTAAGTTATTAATTTAAAATTTATTATTTAATTTTTACTTTTAAATATTAAAGTTGTTTGATAAAATTTATTTTAAATCATCAAATTGACATATTTATCTATATAAATTAAACTTAGGATAAAAGAGATCAATTAACAATGAAAGTCGTGCAATAGTAAAAGAGATCGTTAAGGTAATTAAGGTAAATAAGGATAAAAATGTAAAACTAAAATATAGATTTAAGAATAAGTTAATTATTTTTATTTATTACTTAAAGTTGTTTTGGACTTTAAATTAGATTATTAAGTTATTTCACTAAATATACTTTATTTATTTAATAACTTGAATTAAGTTATTAAATTACTTTAATTTATTAAGTTAGTCTACAAACACCTGCTAAGCTTATGAGCGAATGACTTGAAACTAAAGATTTAACAAGAGATGTGAAATAGAGGCACCATATAATATGGAAGTCGGATTATTCTTCTCTGTGATTAATTGCTTGGACGGTGATGAATAATTGAATATAGAAGCGTGGAGCATGCTGTGGGTGGACTGAAATTAAGTATACTCAACTAGTTTGTTCTCACAAGTATTAGGATTAATTAATAAGAGCTTAGCTTGATTGGGCTTGTTGACGCCAATAAACAATCCTTTATGAGCAG
>VvCYP714A1d  (1500 bp)
GATTGTGTGTGATGAGAGTACACACACACACACAAAAAAAAAAAAAAAAAAAAATCAAATTACAATTCTATAATCAAATATATATTGAGGACACAAAATTGGAATAAAATTGACATAAGCAATACAAAAAAGTGATTATTATGTTGGAAAATTATTTTATTTTCTATACCAACTTACTAATTATAAATCTCTTAGGCTATTTTCTTTTCTTACTTTATATTTCTAAAAATAATTTTTTTTATATAAAATATAAGATTTTTAATGGAAAAAGAAAACAAAAAATTACAATTGTTTTTACTTTCTTAAATTATAAAAATTCTAAAAAATGTTTTTAAGTATATAGGATATGTATTAATATTTATTATTATTATTTAAAAATCCCTTTATTTTATATAAGACTTTCTATTTTTAAAAAGACAAGTAAGAAATATAGTATGGGTTTGGATATACTTTCTAGCTTTTATTTTTAAAATTAGAAATTTCTTAAAGTACAATATGTTGTATATAAAGTATAGATTTTAATGTCCTTAAAACCACTTTAAATTATAAAAATTTGAGATAATATTTGTTTTTATATTAATTTATATATATATATATATATATATATATATATATATATATATAAAGTTCTAACACATCTTATATCTTATATAAAAGTTATTACTATTTTACTGATTTTAAGGATAAAATTTAAAAATATATCCAAATAGACGGGTATCTAACCATCACCAAAAGCATAAGCTTTATTTATCGATTTATTCAAAATTGGTATGGAGTTCTATATTTTAATTGCTTAATTAGTGTTTACTAATATGTAAATAATAAAAAAAAAAGAAGATAAAATAAAAATAAAATTTTTTACTTCTATTATACTTAGTAAGATGCCATTAGCATAAAATAATACAAGTAAAACAAGATCTAGACCATATCTAAAGAAGCTAAACAAGAGAAACCTAAAGTCACCTCCAATCCAATTTTTTAATCTTATTTTGGAACCATCTTCAACATGTATGGTTTACTATTGAGATCACCGTCACGTGGCATGCCTCATATAGATAACCATTTCCCATCACTGTCCTCATGGTTGACATCATAATCACCATGACATGCATCACATAAAGAAACAACTTCAAATCACCATCATCATCATAGATGATATCATTGAGACCATGAGAGGTATTCATTGTATGTATTCAAAGAAATCACTTTGTCTCACCAATAACGTACGTCGGCCATGTAAATGATATATATTAATTATTTAGTGAGTCGTTCTGCAGTTATCATCGGCTGTTAATATCAGTACCATCGAGGCCTATTTTGTATTAATAAAATAGTAGTGTGTTTGTACCTTCAAAGGGTTTATAAAATCTTCCTTCTGGGGTTTGTTTGGGTTCACAGAAAAATATTACAAGAAGGAAAGAAGAAAAGAAAGGAGAAGGGAGAGAGGGAGGGAAGGGAGGAGGAAAAATGGAAGCTGCAGGGTTGGGTTTAACTACAAAG
>VvCYP72A10b  (1500 bp)
TCACCTTCAACAGGAAATCGAGGGAAAAGAGGTAAGTTAACAACAAAGCTGTTCATAATATTTACCTGCTTGGATGATTAAAAGCTTGTTCTGTTGGGATAGAATGCTTTGATGTTGTAGAACAGTAGAAGTAATTATATACTTATGTGAGTAAAATCAGAAGAGATTTCTGAAACGAACCTTCAACTTCTCTAGGTGGAAGGCAGGATTGATTATCCTTCTTGTTTTGCCCACACCTCACCCTCTAGAGCAGTTAATCCCCGTGCTAGAGTAAGAATAAGAGGGCTTATATATGGCTTCTGAAAGTGTCCTTGCTTGTTAGACAGTACTTCTTTTATCATCCCTGGATCCATGACAATCAGCCTAGGTGTTGTCCCAGCCCAAAACAACGATACCTTCCCTGTATCCACAAATTTCAATGTTAAGTTCACTGTAAAACTATATGTTCATAGTAGAAAGCATTTGATAGTTTAAGATATGCGCATACCGTACTGCTGCATATTATTCTGGGTGAACGGATCTACACGCGAAACAATATGATGATTTAGATTCATCGGTTTCGACCATGCCTCAGTTATCAACCTTATGTACTCTTTCATATCACCCATGACCAGCTTGTAGGGAGTGCCTCTAATTCCTTGTTGCCTTAAGCGTTTCTCCAGCCATTTCGGCTTCCACCAAATGGAGTAGGAAACTCTCAGAACACCATAAAGGAGCAGAACCAGTGAAGAGATTAGTAGACAAGAAAACATAGAGACGGCCATCTACTGAACAAAATTCTCTTTGTGTTGTTAAGATTTGGTTGAATGATTGATGCTTCATAGTCTCAAACTTCTGCAATATATATACTGTGTTTTCTTTTTTTATTTTTACCGTTATTATCTGAGTATGAGATATCTGACTTTCAAGTTCTGTTCCAGAATGAATGTTGATTGTTTCCCAGGATTTTGACTAAATTTTCTTGGAGAAGAAGATGCTCATGTGGGGTCGTACAGCAGGGAATTTTGAAGTGGGACCCTGTTGATTCATGATCATGGCCGTCCAATTTGTGAGTCAGCTTTAGACATTGACTCTGATCTTTTGACGATATGCATATATAAGTTTATTTGCTATTACTTTCTTTTGTTTATTGGGAACATTATCTTTGAAAGAGGAAGAAGAGATTATATCAAATGGGTTGGTGGATAATAATGTTTGTTTCTTGCGTTTCTAGTATTTCGTTCATTGAATAAAAAAATAAAAATGGAAAAGAAAACTTGGAAAGAAGAGAACTTGGAGAAGGGGGCATGAAAGACTGAGCATTTCACAAGCCCTACAAATGATTGGTAGTTCACTCTAGCAATGAACTACAGGTGAGACCAATATCATTTGGGGGTTGCTGCTAGTTTATGTGGAATTCCTCAGGGTAGGTGGCCTTGTAGTAAGGTGTCAAAAGCTGGAGCAGAGGGTGGGAGGATGTGAGAGGTGAAAGGAGTTGAAGAGAGTGGAATAACATCAGGA
>VvCYP72A10e  (1500 bp)
TCAGACCGTCGACTGAAAGCAAATTTGATCCGGATCAGCAATTGAGCCGGTAGGGCTATTGAACCGCCATCGAACCGGACGACCCAGCCGTTGAACCATTGACCTGGTGAACTGGGTCGCCGGTTTGGGCCTGGACCTATCTCTAAGTGAAACTCTTTCGGCCAAAATGGGCCATGGTTTTAGGTTGAAATTGGGCGAGTGGGCTACCGCTTGGGCCACTCACAGACATCCACACTCAGGGCAAGCCGACTATATAAAGAGATGTTTATTCCTCATGCCATTCAGATATGGGACTAACTTGGGAAAATTAGGATATCATGACTATACTATTTATGCCTTATGTAAACATTTCCACAACACTAGCTTAAAAAAAAAAAAAAAAAAAAAAAATCTTCCCAAAATTTTTATAATAATAAAAATGCAAACAATTTAAAGTAAACTAATATAATTTTTTAAAAACTATAAAATAATAAGGTGTATAACTTTTAATATCTTTATATATATATATATATATATATATAAATTAAATAACTTCACATCTAAATATTTTATATATTTTATTTAAGAAAATCTTAAAATATTAATACATCTACATATTAATTTAATAATATTAAATAAAAAATAAATATTATTATTTTTTAATTTCTTTATATATTTAAAATATTTTAAATTTTAATAATATATAAATTACATATTTATGATATCATTGATTTGACAATCAGTTTAATCAGTGAATCGTAAGTTGTTAACTTTTTTGGTTTAATAATCAATCCAATTCTAAAACCGTCGATTTGGACTACATATACCAAGTCTTCTCGAGCTTGTAATAAAAGATAAAGAAGATGAAATTGTAACATCTCAAAATTTGAGCTTGTGGCATATGGAAATCAATCTATACATAATTACTATGTATATATTATCAAATATATGAATGTAGAAGCTATTTTAATTATCAACCATAGAATTGGCATGGAATATTATAACATCCCAAAGGTGCGTTGACTTGAAACATCCCAAATTAATTCTAACACTTAAAAAAAAAAAAAAGCAAAAGGTGAAAAAGGAAAAGAAAAATAGTTAGGAAGAGAAGAACAAAAACTAAACAAATGAATCCGGAATACTAAAAACATAGAGTAAATGATAGGATCAAGATACAAAACAAATGGGATAAAGATAGGATCAAGACACAAAATAAAAACTCATATTTAGCTTTCGATATGATTCATTTGATAAGGATAATAAAAGAAAAATAAATATATAATATTAATTGTTTTATTTATACATCATCACACCGTCTCTATATGAATACCATCTTCCTAAGAAGAATAACATGACTAACAACAATCCACGACAATAGTTTTGGAACGATTGCCATTTGTTTGTTAATATTCTATTGTCTTGCTAGTAGGGCATGGACAGCTTTAATAAAGTAATTTTTTAGGAGAGTGCATGTCATTGGATTCTTATAAGGATGCATGCCTGTATCTAGGCTTCAAATTT
>VvCYP72A10h  (1500 bp)
TGGATTTGGACCGAACCATGCAAAGAAATTTTTACGTGCACGTTTATGCCATTATTGGATAGTGTTAGCCTCAGATTGCTTTTAGTTTGGACTTCACACAAATTCAACTTTGGGTATTAAAATTCAGTTGAACCCAACTTGGACCATGAAAACAATGAAAACTTCAACCATAGTTTCTATGCTGAGTTATTATAAATGGACTAAATCATTTTTTCAGAATTGTCTCAATGTCAATTGATATTAAGGAATGAACTCTATTCATTGTAGCCTTGAGATTAAATAATGAAATCAGAAGTTATTCACAGCTCCCAGAAATTAAACAATTGAAAACTAAAAACAGTACTTTTCAAAGTGGAAGTATATTAATTTCTTGATAAAAGAAATTGCAATACAGTTAGCAAAGATTAAGAACTACCACTGAAGTCTAAACCTTTGGTGTAATTTAAGAAAGAGGAAAATAAACAAAACAGAAAGGAAAAGAAAAATAGTTAGGAAGAGAAGAGCAGATAACAAACAACTGCTTTAGGGCAGTATAAAAAAGTTGGCCATAATTTGTAGAGATCAGCAAACTTTAATACTATGATGAAAAGTAATCAGTCATATCGGTACCGTATTTCTTAATGAAATGACAATGGAAGGGCAGGACACGCGGAGCAATTTCATCGGAGAGGCTGATTGGTCTTGAATATGCTTCTTTTAACATCATGGACATCTCTTTGAAGTCCCCATGTAAAAGCCTATAAGAATTCCCAGCCAGGCCTTGCTCTCTAAGGCATCTTTCTAACCTCTTTGGCCTCAACCACACCCAATTCAGTAGCCTCCATAAACAGCTTATGAGCACAGTAAGGAATCCAAAAGAAATTGCAACTGAGCTATGCTTCATTTCCAGTTTGAGGGACTTCTATCAGGAGACGTGTGTTAAATCACTTCAGAGTGAGAGAATGACTTTATGCTGCCGATGTGTATAAATTGGCCCCTCTTCTATTCCCTCGTGCCGGCAAACATAGAAGATTTCGTCAATGCCTAATGGGGAGAAGAACGTCTAGTATTTTAAAATCTATAAATTATCTATTTTAATTGTCTCTATCAATATGGATTTTAAACTTGTCAATGAATTATTAATTTATTCTATTTGATACATTTCAAAGTTTGTGCAATCATCACTGCTTATTAAAAACTATATATGCCATGAATGTAGAAGGCAAAATTTGAGCATACGGAATATGGAATTCTATTTGATGGACCAGCTTTCACTTGTGAGTAGATGGAGCATGTGGATGCTCACTTTCAGAGCCTCGAGGGACAGCTCGCATCCCTCACATCTTGGCAGATGTCGCAGGGTGCTTCCAGCTCTACAACTCCATCTGATCTGGACTTTTTGATACTTCATGTTTTTTTTTTCGTTTTTTCGTTTTTTTTTTGTTTTTTGTTTTTTTTTTTTTTTGTTTTTTTGTGGATAAGTTTATTTTGTACACCTAACCATCTTGGCTCAGTCTATCA
>VvCYP72A10k  (1500 bp)
TAAAAAATAAAAAATAGAAAATATATTTAAAGAAAGCTTTGCTTTATAAATTATTATTAAAGCCTCATTTTTTAAATAATAAGATATTAATAGGAATGAATCATCTGGTCATTCCAAAGTATACATGGATTGTTATTGATGGTTATTCTTCTTGGAAGATATCATCCATACAAACCACTGCCAAATTTTTCAATGGCCTCAAGTGATAAATGACAAATACAAGAATGATGAATAAAAACATGTTATATATATATATATATATATATACATATATATATTATTTTGTTTTGTCATTGCCATCATGCCGGTGGTAAAAACTAAGGAATTTATCCCGACTTTAAAAAACATGATTACATGATTTTAACGTGAGTGATTAGACTGATGAACCTAGAGTGCCTTTGAAAGTGATTCTAAAAAATATTACTAGCATTTTAAACATTTGAATGATAAAAATTTTTAAATATTAAAAATGTTAAAAACACTTCTTAAAATCACTATTAAACGAACTCTTAATGTGATTTTAGTAGTGATTCTAGCATTTTTAATATTTGAAAGGTAAAAAATTTTAAGTGTTAAAAAATGTAGAAATACTTTTTGAAATCAGTATTAAACACATGCTTAGAGTCTATTTGACAATGATTAAGGGAAGCTTTTTTATTTTAAAAAGTTTTTTTGAAAAAAAATAAAAAGTGTATTTGATAGTGATTTTGAGAATTGTTTTTAGTTTTTCTAATACTTAGAAATTTTTATTTTTCAAGTATTAAAAATGTTAAAAACACCTCATGAAATTAATATTAAACGCACTCTAAGAGTAGAGTGCATTTGTAAGTGATTTTAAAAATTGTTTTTAGTATTTCTAAAACTTGAATAATAAAATCTTTTAAGTATTAAAAATATTAAAAGTTCTTCATAAAATTATTACCAAACGGGTTATAAGCGTTTAACAAAATTTATGAAATACTTCTAAAAATCTGAAAAATATTTTATAATATTAAAAAATCACTTATAATATTTTTTGAGAAAATACTTATATTAAAAATACTTGCAATGGTTCATAGGTCCAGTTCAAAAGAGCACTTGCGGCATCGTGTAATAAGCAATGACGTAAGCAAAGATGGCGATACAAAGAAAATTTTTATACTATAAATTCCTGAGAAGTTGAAAAACTAATGTTGATAGAGACCATTTAAGACATAGTGTACAGGCTTTGAAATGATAACACGTGTTCCTATCGTAAGGCAATAAAAAAGTGGTGTATATTTGCCGGCCATTCCTCGCCAGTGCATAGGATAAGAAGTGATGTCGCTCCTTGAAGTCTCTTCCAAAGTGGAAATGAAGCTTAGCTCAGTTGCAATCTCCTTTGTTTTTATTACTCTCTTGATATATGCATGGAGGTTATTGAATTGGGTGTGGTTGAGACCAAAGAAGCTAGAGAGATGCCTTAGGCAGCAAGGTCTGACTGGGAATTCCTACAGGTTGTTGCATGGGGACTTTAGAGAG
>VvCYP72A11c  (1500 bp)
ACAATGGGATATGGACCACATGGATGTCTATTTTTTCCTAATTTCCACATGCAAACTGACAAATAGAATGTGAACAAAATAAGGACAGCATGGTAATAATGATTGAAGAATAACAAATTTAGTATTCGATGGAATATATTTTCTTTTTTTTTAAAAAAATACAATAATTTCTATGTAAAATATAATAATTTTTTTATTTATAAAAAGGTTTAAATTGAAAATGTAATGATTTTTAAAAATTAATTTAAAAAAGTGAAGTGTTAAAAGCTTTTTACTACTTTAAATTTTGAAAAAAATCAAGGATATAAAAGTTAATATTTTTTTATTAGAGTTTTTATTTTTTAAAATAAAAAATAAAAAATTATATTTAAAGAAAGCTTTGCTTTATAAATTATTATAAAAAGCCTCATTTTTTAAATAATAAGATCATCTGGTCATTCCAAAGTGTATATGGATTGTACGTTCTTGATGGTTATTCTTCTTGGAAGATATCATCCATACAAACCACTGCCAATTTTTACAATGGCTTCGAGTGATAAATGACAAATACAAGAATGACGAATAAAACTATGTTATATATATATATATTATTATCAAAATTTTGTTTTGTCATTGCCAGCATTTATCTGCTGGTGGTAGAAACTAAGTATACAAGTGCCTCTTTTCTTTGTCACGGCTTAAAAATTTTTAAAAATATTTAATTTTTTTTCGAAAACATTTTTTTAAGTTAAAAACCTTTTCTAGAATTACTATTAAATGACTCTTAAAGTCCATTTAGTAATGATTTAAACATTTGTAATTAAAAAATAAAAATTTTCAAATGTTAAAGGTAATAAAAATACTTTTTAAAATTACTACTAAACGTATTTTTGGAGTCTGTTTAACAGTAATTTTAAAAAGTTTTTTTATTTTAAAAAACATTTTTGAAAAGAAATTAAGTATTTGAGAAAATTTAGGAAACAATTTTAAAAATCTAAAAAATTACTTATATTTCTAATTTTATATTTACGGTTTCAAGAGAGCCTTAGGCATCGTTTGTAGTAACCAATGACATAAGCAAAGATGGTGGTGATACTACGAAATTTTTGGAATACTGAGAAGTTGAAAAGCTAATATTGATAGAGACCATTTAAGACATAGTGTACAGGCTTTGAAATGATAACACGTGTTCCTATCGTGAGGCAATAAAAAAGTGGTGTATATTTGCCGGCCATTCCTCGCCAGTGCATAGGATAAGAAGTGATGGGGCTACTCGTATAAATTGGTTCTCTCAACTATGAAGTAATTCAGAGGTCGCTCCTTGAAGTCTCTTCCAAAGCGGAAATGAAGCTTAGCTCAGTTGCAATCTCCTTTGTTTTTATTACTCTCTTGATATATGCATGGAGGTTATTGAATTGGGTGTGGTTGAGACCAAAGAAGCTAGAGAGATGCCTCAGGCAGCAAGGTCTGACTGGGAATTCCTACAGCTGCTTGTATGGGGACTTTAAAGAGATGTCGAGA
>VvCYP72A10n  (1500 bp)
TGTAATGATTTTTAAAAATTAATTTTAAAAAGTGAAGTGTTAAAAGCTTTTTACTACTTTAAATTTTGAAAAAAATCAAGGATATAAAAGTTAACATTTTTTTATTAGAGTTTTTATTTTTTAAAATAAAAAATAGAAAATTATATTTAAAGAAAGCTTTGCTTTATAAATTATTATAAAAAGCCTCATTTTTTAAATAATTAGATCATCTGGTCATTCCAAAGTGTATATGGATTGTACGTTTTTGATGGTTATTCTTCTTGGAAGATATCATCCATACAAACCACTGCCGATTTTTACAATGGCCTCGAGTGATAAATGACAAATACAAGAATGACGAATAAAACCATGTTATATATATTATTATCACAATTTTGTTTTGTCATTGCCAGCATTTATCTGCTGGTGGTAGAAACTAAGTATACAAGTGCCTCTTTTCTTTGTCACGGCTTAAAAAACACGATTTTTAATATGAGGGGTTAGACTGATTGGTTTAGAGTGTAATTAATAATGATTTTAGTTGAAGTGTTTTTATTAAAAATGTTTTTCAGAAAAATCACCTATCAAATATTTCTTTAAAAAAACACTACAAGTAATTTTTTTAACACTAGAAGTGGTTTTTAAAATTTTTGAAAGTGTTTTATGAATTTTGTCAAATATTTAATTTTTTTTCAAAAACATTTTTTAAGTTAAAAACCTTTTCTAGAATTAATATTAAATGACTCTTAAAGTGTATTTAGTAATGATTTTAACATTTGTAATTAAAAAATAAAAATTTTTAAGTGTTAAAAGTAATACAAATATTTTTTAAAATTACTATTAAATGTATTCTTGGAATCCCTTTAACAGTAATTCTAAAAAGTGTTTTTATTTTAAAAAAGAAATTAAGTATTTGAGAAAATTTAGAAAACAATTTTAAAAATCTAAAAAATTACTTATAGCGTTGAGAAAACACTCACTTTGTTTTCTGTTTTTTATTTCTAATTTTATATTTACAGTTTCTGGTTCAAAAGAGCCTTAGGCATCGCTTGTAGTAAGCAATGACATAAGCAAAGATGGTGATACTATGAAATTTTTGGAATACTATAAATTCCTGAGAAGTTGAAAAGCTAATATTGATAGAGACCATTTAATACACAATGCACAGGCTTGGAAATGAGAACACGTGTTCCTATCGTGAAGCAATAAGAAAGTGTTGTATATTTGCCGGCCATAGCTCGCCAACGAGTAAGATAAGAAGTGATGGGCCTATTAATATAAATTGATTCTCTCAACTATGAAGTAATTTAGAGGTCGCTGCTGGAAGGCTCTTCCAAAGTGGAAATGAAGCTTAGCTCAGTTGCAATTTCCTTTGCTTTTATTGTTCTCCTCATATATGCATGGCGGTTATTGAATTGGGTGTGGTTGAGACCAAAGAAGCTAGAGAGATGCCTTAGGCAGCAAGGTCTGACTGGGAATTCCTACAGGTTGTTGCATGGGGACTTTAGAGAGATGTCGGAA
>VvCYP72A10r  (1500 bp)
TCTCATTGAACATGATAAAAAGATATAGCGAGAAGATATGACCACACACTCTCTAATGGTTAATTTAAGTGCTTGTCAGATATTGAGATGGCTAAAACCTTTTTTGATATATAATGATTTTTTTTTTTTTTGTTAATAAATATGTTTTCAAATTTTATATCATTTTTATTTTTATTTTTTTCCAATTCTATTTTTATCCCATATTTATTTTATTTAAACCAAAAATTGTTGAGAAGGGAGGAAGAAAGAAGGCCACCGGTTCTTCCCTTAACTGGTTAAATGGAATTTTTATTTCAAATTTAAAATAGATGGCCAAGATGTAATATTGAACACCCAATGGCTTAGAAAAACTTTTAGATAGGTACCGAAGAGGTACCCTAAAATTTTCCTTAGAAAAGATATATGTATTTGTCATTTTCTTTTATGTTGCCAAGATTAGCCAGGTGTCCAGACCTACATTGATGCAAGCATAAACTCAAAGCTGCAAAGTTGATTGAATTGATCAGGTCTTTCAAATGATACCTGCCTGCCTAGCAAGAAAAAGTATTCATGTCAGTTTATAAGCAAAGAAAGGTATTCATATTTGTTTCTATGGCATTGTAAAACTATTACAAGCTTTTGTTTGTTTCTATTTTCTTTATTAGGCCCTTTACTTTCTTAATTTTATAAGTATATTTCTCTGGTAACCCATCTTTGTCACAAGACATATTATTTAGCGAAGAGCCATTACATGGCCTTGGATATGTCTTCTGGTAACCCATCTTTGTCACAAGACAACTGAAGATAAACATATACTAAAGGGAAGCAGCATGTCCGTAGAAAAATCTCCACTATAGGAACAAAACTATTTTTTATTTTATTTTATAATAAGGTAACATTAGTGAGAATTGATGACTTGTCCTTTCAAAATTGTTGTGATACACAGATAAATGGAGGTTTCTGTCGTTTGTATTTGTCTATGGTTTTTTGTTAGAAAAATAAAAATATAGACAAAGACATAATTAATAAACCCCTGGCATAATTGCTTATTAATAAACCCCTGACAAAGACAAAGACATAATTGCATATTATTTAAGGGTAGACATGATATATCATTGCTTATTAATAATTGCATAATGACGTCCACATTTTTTTGTTAGAAAAAGGAAGAAAAAACAGACAAAGACTTGGTTAATAATTGCTAATAACAACCATATGATGGACCAAACCCTATTAACCGTGTAGTACAACATTATAAAGTTGTTCCCAAGCCTCTCTTCAAAACATTCTCAAACATGGAAATGAAGCAGCTGAACTTAGTTGCCTTATCCTTTACTTTCATCACTATCCTAATATATGCATGGAGGATACTGAATTGGATGTGGTTGAGGCCGAAAAGGCTAGAGAGGTGCCTTAAACAGCAAGGTCTGGCGGGAAATTCTTACAGGCTGTTGCATGGGGACTTCAAAGAAATGTTCATGATGATAAAGGAAGCAACTTCAAGACCCATCAGCATCTCTG
>VvCYP72A10s  (543 bp)
AATGTTTACCACTGGTTTTGGGCCCATCCATATAAAATAATTTTTACCTGCATTTTTAATGGTCATTGTTGGATATAGAAATGTTACAAGAGGATCTAAAGGACCCGGCTAGTCAAGGCCCTCTGATTAAAGAATCCTTAAATATGTGAAAAAGATAAAACAGATGTAGTTAATGTGGGCATCCGGGTGTAGCCGGGTAGGCAACCCATCCCAAGTAGTGTCAACCCGGATGCTCCCATCTAACCAAAGCTATCCGGGTAGTTAGACACCATAAATGGATGTCTGTTATGCGCCATCCGACCATACCATTTGAATCACTGCACTACTTAATTCAAATGGTTCTGGTTTTCCCCAGCTTACACAAAGTTTATATATATACACTACCTTGTGTCTGTAGTCATCAGTGCTTTCCTCAATTCAAGGTTAGATGAAAATGTAAATGAACCATAACTATGTAGCCCTATTCCTAATAGATTGACCACAAAATAGCATATCCAAATTATAAGAAAGGCCACAGAAGCCACAATTTCAGAATTTGCGATT
>VvCYP72A10u  (1500 bp)
TTCCAGTTTGAGGGACTTCTATCAGGAAACGTGTGTTAAATCACTTCAGAGTGAGAGAATGACTTTATGCTGCCGATGTGTATAAATTGGCCCCTCTTCTATTCCCTCATGCCGGCAAACATAGAAGATTTCGTCAACGCCTAATGGGGAGAAGAACGTCTAGTATTTTAAAATCTATAAATTATCTATTTTAATTGTCTCCATCAATATGGATTTTAAACTTCTCAATGAGTTATTAATTTATTCTATTTGATACATTTCAAAGTTTGTGCAATCATCACTGCTTATTAAAAACTATATATGCCATGAATGTAGAAGGCAAAATTTGAGCACGGAATATGGAATTCTATTTGATGGACCAGCTTTCACTTGTGAGTCGATGGAGCATGTGGATGCTCACTTTCAGAGCCTCAAGGGACAGCTCGCATCCCTCACATCTTGGCAGATGTCGCAGGGTGCTTCCAGCTCTACTACTCCATCTGATCTGGACTTTTTGATACTTCATGTTTTTTTTTTTTTTTTTTCGTTTTTTTGTTTTTTGTTTTTTGTTTTTTTTTTTTGTTTTTGTGGATAAGTTTATTTTGTACACCTAACCCATCTTGGCTCAGTCTATCATATATTTGTTTGTCTAGATGTACTTTTATTTTCTTATCTCTTGTATCCAAAACCTTTTTTTACCATATATGTCCATGTGTTTGCTTTTCTTTTCTCCTTTTCGTATGCTTACTGCTTCATCATGCTCTTTGTCATTTTTTGCAATAAAAAGGGGGAGATGGATTGTTGATTTGATTGAGTGTTTTGCAATTCATATTTTTTTGACATCTGTTTCATGACTTGCATCCCCTTCCTCATTTACCTGATTTGATAAAATTGATCAGTTATCTTTCTTCCCACACACTACTTTACCTGGGTATGTTGTTTAGTGTGTGCAAGTTCTAGGTACTAGGGTATTGCTCATTTTTTGGATGTGGCTTCTAGTCCTTTGCACGTTAGATGATGAATTGGTTTAGACAAGGGGTATTGAGAGATTTGTAAACTCCATTTGAGAGTATTGAGGGGTTTATGCAATTTGTATTTTATCACAAAATTGCCAAAGGGAGAGATTGTTCATACATTAGGTGATGTAGTTTAAAATTGTCAATTTTGTTCTATTCATTTTGGTTTAGGATCTTTCTAGATTGTGTCTCACTCCCCATTGAAGACTCAAGGTTATTAATTGATCAACCAGGATTACATAGGTAAGTGTAAAAAGATTTGTGAAAGGCAAGTTAGTGTTGGGTATGACATGGCATGGATTGAGTGGTTTAAAATTGAGCAAAATGATTTTCTAACCGGGTTCAAAAAATGCCTAAAGCACTCAAGCACTCTAAGAGCATTTGAGCCCTAGCAATAAAATTCTCTAGAATTTTGGAGATCTGTCTTTCTATTTTTAAAGGATTTATTTTGAGGAACTTTTTAGAATTAGTCCACTAGGTTCCTAGGCTTATATATACATTGCTT
>VvCYP72A10i  (1500 bp)
TGGATTTGGACCGAACCATGCAAAGAAATTTTTACGTGCACGTTTATGCCATTATTGGATAGTGTTAGCCTCAGATTGCTTTTAGTTTGGACTTCACACAAATTCAACTTTGGGTATTAAAATTCAGTTGAACCCAACTTGGACCATGAAAACAATGAAAACTTCAACCATAGTTTCTATGCTGAGTTATTATAAATGGACTAAATCATTTTTTCAGAATTGTCTCAATGTCAATTGATATTAAGGAATGAACTCTATTCATTGTAGCCTTGAGATTAAATAATGAAATCAGAAGTTATTCACAGCTCCCAGAAATTAAACAATTGAAAACTAAAAACAGTACTTTTCAAAGTGGAAGTATATTAATTTCTTGATAAAAGAAATTGCAATACAGTTAGCAAAGATTAAGAACTACCACTGAAGTCTAAACCTTTGGTGTAATTTAAGAAAGAGGAAAATAAACAAAACAGAAAGGAAAAGAAAAATAGTTAGGAAGAGAAGAGCAGATAACAAACAACTGCTTTAGGGCAGTATAAAAAAGTTGGCCATAATTTGTAGAGATCAGCAAACTTTAATACTATGATGAAAAGTAATCAGTCATATCGGTACCGTATTTCTTAATGAAATGACAATGGAAGGGCAGGACACGCGGAGCAATTTCATCGGAGAGGCTGATTGGTCTTGAATATGCTTCTTTTAACATCATGGACATCTCTTTGAAGTCCCCATGTAAAAGCCTATAAGAATTCCCAGCCAGGCCTTGCTCTCTAAGGCATCTTTCTAACCTCTTTGGCCTCAACCACACCCAATTCAGTAGCCTCCATAAACAGCTTATGAGCACAGTAAGGAATCCAAAAGAAATTGCAACTGAGCTATGCTTCATTTCCAGTTTGAGGGACTTCTATCAGGAGACGTGTGTTAAATCACTTCAGAGTGAGAGAATGACTTTATGCTGCCGATGTGTATAAATTGGCCCCTCTTCTATTCCCTCGTGCCGGCAAACATAGAAGATTTCGTCAATGCCTAATGGGGAGAAGAACGTCTAGTATTTTAAAATCTATAAATTATCTATTTTAATTGTCTCTATCAATATGGATTTTAAACTTGTCAATGAATTATTAATTTATTCTATTTGATACATTTCAAAGTTTGTGCAATCATCACTGCTTATTAAAAACTATATATGCCATGAATGTAGAAGGCAAAATTTGAGCATACGGAATATGGAATTCTATTTGATGGACCAGCTTTCACTTGTGAGTAGATGGAGCATGTGGATGCTCACTTTCAGAGCCTCGAGGGACAGCTCGCATCCCTCACATCTTGGCAGATGTCGCAGGGTGCTTCCAGCTCTACAACTCCATCTGATCTGGACTTTTTGATACTTCATGTTTTTTTTTTCGTTTTTTCGTTTTTTTTTTGTTTTTTGTTTTTTTTTTTTTTTGTTTTTTTGTGGATAAGTTTATTTTGTACACCTAACCATCTTGGCTCAGTCTATCA
>VvCYP734A1a  (1500 bp)
TGCTATTATATTTTAATTTTCCAATAATTAAAAAGAAGAAAAATGTTGTAATTCATGAGTCTGGCCAAGTGGAAGACAGACACCAAAATGGTCCAAAACCTAAATCCCAATACCAAAACCAAAGAGTTTGGTGTAAAATTGGAGGACCATTGAGGGGCAAATGGCCCCAACATGTCTTGGGATTATTAAGGCAGGATTAGGGATGGTGTCCTAGAGTGGGGCACCTATGGCTGGGACAACAAAAACAAAATCTCTCCTCTTAACAAAGGAAAAGGAGAAATAAAACCCTTGTCCATGTGCAGATATTAAAGGGCAACCTTCAAAAAGACCAACCCTCCAATATAATTTCTTTGGAACCACAACCCTTCTCATCAATTCTATTAATTATGGCCCATCCTCTATACTTCTTGCTGTTAATTATTTCAGTGACTGCTTTTTAGAATTTAACTTTTTCTGTGTCTTCAATTAAATAATTGAAATAAAATATAAAATAAATATATGGTATGGGAAAACTTATGTGTGTCCAAATTTGTTTCACATGAACATCTCTAGTGGGGTTTTTCTTCTGCTACAGTTTGGAGTAGTGTGTGGTGGGACAATGTTTGTGCCTGTGAAAGAGTGAGATTGATGAATGGAAAATGATTATGTCATAAAATGGTAAAAAAAGGAAAAGGAAAAGGAAAAAAAATCCATAGTACAATCTGAATCTTTTGGGATGATGATGGATACATCACCTTCATATAGGCCTATTTCCCACTCCCAAAGGCCCCATAATTGGATTAGATTAATTCTTAGCTCAAATTCATGGTTAATTTAAGCCTAATTCGATTACATGGTAAGTATTAAGCTCTAAATATAAGTTTTCAATTATTTTCAAATATTTCAATCCAATTGAACTACTGAGCTACACCTCAAGCTTGACCTCATAAATGGATGAGAATTTTAGGCTGATTCTCCATTGACTTTCTTGTATGACAAAAATTGTCCAAATAAATATTTTAAAAAATGGTAAAAAAGAATGTACTTTATTGAACATTAATTCACTTACTGCAAACTTGAAAATAGATTTTCTATTTGGCTTCAAGGGGTCAAAGAAGTTAGTTGAGAGTTAGGTTTAATTAAAGGTTTACGTGAGGGATTTCGGAAAATTTTTAGACTTTTTGTCAGAATGCAAATCTTAAATAGGATAAGAAAAAACAAAACAAAATCTGGGAACATCCTTATGATAAACTAATGAGGGTGTGATACTCTCTTCAAATGATTGAAATTTACTAAGCCCACTTCAAAAGTTGACCCTCAAAACTCCATGGCACCACCCCTATATGGCCTTGTGCATATCTCCTCGCTTCTCTCCCTATATAACAAAGCACAAAGCCACGCCTCTCTCTGTCTATCTCTCTCTCTCTCTCTCTCTCTCTCTCTCTTTCTCATTGAAAGATAAACAAAGAAGCAAGTATGGAGGAATACTTCTTGCAGTGGTTTTGGCCTCTCTTCTCATTC
>VvCYP734A1b  (1500 bp)
ATGGCCCCTACATGTCGTGGGCATATTAAGACAAAGATTAAGCAAGGTGGGGCTGCGTAGGCACAATTGTTGGGTCAACAAGGGCATATTTCCCCACCAAAAGCACAGAGAAAAACCCCTTAAATAGACAGCCTTGTTCCCATGTGCACAAATTTAAGAGCAACATTCCAAAATAACAACCCCCTTTGTGCCCCCTCTTTCTCTCCACTCCCCAAATCATCTTTTCGGGAACAAGGAATAAGCTAACACCAACCCCCAACCCCAACCCACATTCATTTTCTTTTTACTTGGAATCCTCCTTTTTTTCTTTTTCTTTTTGGCCCCATTTACATTTCCCATTTTTCCATTCTATTTTGTGGGCTTTTGTCTCCTCTCTCGACAGGGTATTTGTCATATAATTGTCCATATCTTGGTATTATCATACATGTACTTGGTCTTTAATTTATCATTTTGTTATATTATTTAAAATTATTGAAGTGGGTGCTCGACTTGACATACTAACTTCCCCTATATCTACATGGTTGGTCCTCTTCAAAACTTTCTCCCAACTTCAATACACTTCATAAAAATAATTAACAGCCTTCAATAATTTTTCAAATTTTAGTTTATTGCATATGAAGATATTGGTTTGGCATCCTAAGATGCATAGATGTACACCTCATACTCTGTTATTCTCCAATCATGCCCTAATTTGGGACAGCCAGCATGTAGGATCATCATGGAAATAAACTAGGCTAATTTCACTGACCACTAGCCTTCATAAAGGAAAGGGCACAGTCCCAAATTGGTATGTCCTTTTTATTTTGCCTTTTTAAATTAAATACATAATCTAATCCACTCCAGCAGGCATTTGAGAGAAAGTTTTTGGGTCAATATAAATATAAAAAGAGAGTATTAAGGGCTTTGAAGAGGTTGGAAAAGCTATTTTTGACTTTGAAACAATATCTTCAAACGTTTTACAACCCACCCTTTCAAAACAAAATGAGAATTGTTTTGACTCTGTTTATCCAATTTCCAAATAAAATTAATAATATTTTTGCATTTATTTATATATTTCTGAAATTAAAACCCTATTATTAAATATGAAAAATATGTTTAGGAAATTACATGGAATGCCCTTTATCACATGACAACTTTTTTAAGAAAAACAGAGAGAAAATAAAAGAAAAGAAAGGGATAGAAAGGTACTAGGGAAAAAGGGAAGGGCAAGATGGTCTTAGAAAGAGTGAAAAGGATTAAAAAAAAAACATCTGAATCGTTGACCCTAGAATACCAATGGCGGCCCCTACGCCGTTGGCCTTGTTGCCAATCCCTCTCTCTCTACTCTTTGTATTAAAAGGAGAGGAGAAGAGAAGAGAAGACAGTGAGAACAAGTGAGAAACATAGCCAAAGTAGATAAGAAGCATTACGAGAAAGGCGCTGCTCCACACTTGGCAAAAAAAAAAAAAAGAAAGAGAAAAAAAAAGGCTAAGGCAACACTGTTGTGTTGTTTTTGTGTCT
>VvCYP74A1d  (1500 bp)
GTCTAAAACTAAACCACTGAAAGCCCTCTTTCAGTCAGCTTTTGCATAGAATGGAGAGAGGAGAAAAGCTATTGGGCCTTGATACACTTTCCAAAATATCCACCCACCCATATATAGAGCTGTGAGTGGGATGGCGGGCCGACCGACTTGGAAAGCTAAATAGATTTATGGAGTCGTGAAAGATGTGCATTTTTCTTTTTCTTTTTCTTTTTTTATGAAGTACCCACACCTTTACATTTTCCCTCCCACAACTCCTCTGTCGCTTGTTCATTTTTTGGTCACCGAGTGTCTGTTACGCGCCCCTTGTTTAGGAGCGTCTACTCCACGTGTATGCAACAGTGATTTTTTGTTGCCCCGTCGGGAGGAAAAGGAACGTGGGACTGCTCTGTCGTTTTATGCCTGGACTGCCTAATCACGTGTTGTTTTAGCATTTGACTCTAAGGGTCTTGCCTCGGTGGCAGTAAGTTGTTCCTGTATTAGCTATTTGGGTTATTACATTACGTTTCGTAAATGATCTGTAATGGATAAATGTTCAATAAAAGAGCCACAGGGAGAGAGTTTGGACGGAGTAGAATCACCGTCCCATTCCCAAAGTACAAACGTCCAGAAAACTTGCAGCCGGCCAGCTTCCCCTTTAATCTGGTGCACTTGCCACGTGTGGAAACCGGCAACTAGTAAGTAATGTTTGAACCGAAATTATGGATACCGCGTTCCACAACTGGAATAGGGTTGTCCGGTTACAGAAATCTGGTCTTGACCATGGTTGGACTTGGAACCACTCAACCTTGGATGTTAACATCCCGGAGTCTGGACGACCTCCACGCTTGAAAGGACGAGCAAAGCCCCCCACTAAACAAGATCACTCTTTTTCATATCTATTTTTTTTCAATTTAGCTTTCATTTGAAAAATAATTTTGAAATGGGCTCAGCACACTTCCCACTTTAATATAAAAATATTATAAATTAAAACATGAACTTCATGGAAGAGTTATGTATTGAAACAATAGAATCCACCGACAGTCAATCAGGGAAGGTGATGACTAATAAAAGAGAAAAACGGGAGAAGGCCTTTCGTATTTTTGTCATCATAACGACAACACATCACATTCAGACCACAAGTTGAAACCAATCAAACTCCCCGTGCCTTCCATGGCCCCGCTAAGGGAGAGGCGACAGTTCATGTTCATTCATCATATACCCGTCACTTCGTTGACAATTTTGACAATTTTAACAATTATTCTCAAACAAAATCATATGTTGTAATAATCTTAGCACATGTGATGTGCAATTGCCCAGAAAAAAAAAAACGTTTGAAGTAATGCATATATTTGTAGCTCACATGAGTTGCAATTTAAATCACACTAAACTCCCATAAACAGGAAAACTTATGGTAAACAATAATTTCTGCAAATATTTGTCTCCGATTTGACTGGAGATGGGTTTACACTAAAGTATCTCTGGTCAATTTTGGGGGTGCCAAAATTCCATGACGTAAAAACA
>VvCYP707A1d  (552 bp)
ATTTTATAACTTAAGTTGCATGTTTGGTCTCATTTTACTGATGATGCATATTCTAAGGATTAAAAAAAAAAAAATACCCCTTTTACTATAGTCCAACAAAAATGATAAGATACAAATGAGTTGTGAATGTAATTTCTTATTTTAAAAATTGTTTAAAATTTTTTAGAGAAATAAAAAAAATTATATTTTTATTTTTCTTTTAACTTTTTGCCATCCAAATTTTAAAATAAAAAATAAAAATATATTATAAAGATGATTTTAAAATCATTTAAAAAAATAAAAGGCATAGAAAACTTTTAATTATATTTTTATCTTTATAAATATTAAATATATTTAGGTGATGTTTAATTAGGTGGGTGATATTCTATGTTGAACCAAATACCGTAACCAGGTTTGCTGGTTCTGAGTCTGCCTTTTTTAGCAGAAGGGTGGGTAGGAGCCCAACCTCCAATGTAAGACCTTAGTGGACCAATGAATGGGAAGCCCTAGCCCACAACTTAAAATACTCTCATCCCCATCTGATTCGATGTGGGATTTCAGGATGTGTTATTG
>VvCYP716A1e  (1500 bp)
CGCTTTTAGTCGACAAAAACAAGGACCATACAAAGGAGGATAACAATGAAAAATGTCAAGCAACTTCTGGGGTCTAAACCCCCCAGACGGGAAGAAAAATGTAAAACATATTGGTTATAATTGAGAACTGAAGGGGGGCTCGTCTTTGAATATTGGTGAATGTGCTAGTCAGCTACTACTTGCAATAGTTTTATTGAAGGTGGGCTTGTCTTTCCCTGATTACCTGGAACTAAATAAAAATCCTCTAGCTAGTTTTGGATTTCACAGAGAGTGACATATAAAAATCCTTTAGCTTGTCTTTCCCTGATTACCATTGAGAGTGCCAATTGGTAACATATTTGAAAGCGACACTAAAGTAGTATATATATATGAACTTATAATTATTTGAGTTTTGGAGTGGTCTAATTAATTAATTATAGCTTATTAGAACTAACTACTAAATTGGGAGCCATTAAAATTAATTTATTAATTAGGATCCTATGGATTAGATTAAGCCTATAGTGAGTCTAAGTCACTTAAACCCATAAGAGAGTTCATATAAATTTACTTAGAGTTTAGGTTTAGATACTCTGCACTCTCCCATCATTAGAAAATAAAGTCTCAATCTCTCTTCTCTCTCCCTCAAGTTTGTGTATGTAGCCACTCTATATTCGTGTCAAGTACTAATAATAGAGCCATTGAGTGAAAAACGCACCTTCTTTTCACGATCCTTGCATTGAAAAGTATAGTTTTTAGCACCTAAATCTAAGAGTTCATTAACAATATATTTCCTTATCCTTTGCTTATATATAGTAACCCTAGGATCTTAGAAAGTATGCACCTTTAATCCCATATTAACACCGACTACCATGTTGCCCTTGTTGTACTTCAAAGTTAATTAGTCACCAACATAAATCATATTAGTTAGTGATGGAACCCTTATGACTATTCACTCAATTTGTATTAGGCCAAGAGCAACAAGTTTTGGCACACAACACATAATCAATCATGATTCAGGTTCGTGTGAGTAGTTTTCATGTCATATTCACCTTCATATATCAAAGCTTATAATAATGAATTCAAGAGATTTAATGAATTTTAAATTGTTTCCATAAAACGTTACTTACCTGGTGTACAAGTTCACTAAAATTTTCAACTACCAATCCTCCTTCCACACTAATTTTTAAGCTACAGCTAAGAAACTCATTCATGGGAGAAAAACAAGGAAGAAAGTGATGAAGTACTTTATGATCTTCCCAGCTTCAATTGAAGGTTTCTAGCAACCACACAACTTGCATTAAGCTAGTTGCTAGTTGGCTTTAAGCAATTGTCCCGTAATCAGCCTCTCTTGGTGTCCCTGAGCAGACATATTAATTTAGCCATAATGGCAACCATATGTGGTAGCTAAGACTGGTTAGTTCTCAGCCACACCAAGGAAATAACCAATTTACTCAACCAGTTACTTTCTCAGCAGTCTAAGCAAACTGCTTGCTTTCATATTAAAGGTAATACCCACCTTAT
>VvCYP722A1b  (1500 bp)
TACTCCTAAGGAGAACACTGCAACCATCATAATTTCGATATGGTTCTGTACAAGGAAGACAAGCTTGTTCCTAGGTAGATTAATCATCTTTAGCTTTCCTTGAGGCAGTCAACAGATTAAGAAAAAGGAAGATTGAAGATGTAATGAATCACAGTTCAAACATCACACTGTATATATAGATAAATGGAAGTCGAAGCTTAAGGAGAGACACTTCAGATCATCTATTGTATCAAAATGTGGAGCATCCTAGGAAGAGGTGAAGAAACAAAAATGTTCAAAGTGGTGAAGAAAAACAAGCTCTTCCTGATGAAATAAACTCATTCCTTGTCCTAAAATGGGCAAATTGACTCTGAGTTAAGCATTAAGCTCCTCTTTAAGGTTGATATAGTAATGATGTGAACCATTGAAAAACTCTATCTCTGAGTGATATTGCACATGCTGCTCCGTAAATGGTAACTGTTGGGACTGATCAGTCACATGTAAAGTGTCAAATCATGTTCAACCACTGAAAAAGGAAATGAATGATTGATGATTGAAGTGTAAATGGGCAGGAAATGAGGTTTTGCTGGAATGGTCTTTCTGGCTTCACGTGCCCATGGAGATGGAAGGACCCACTTGGACATTGGTCATTTGAACTAAGTGGTCCGTCTCATTCTGATTTCTGAAAAAGATTTGAGTCATTTGGGGTACAGTTTGAAACAGCACAATATTAGTGCTTGGGCAAGATTGATAGTTTTCATTCAACAATGGTTAAGAACAGCTTGGACTGGTGCCATCCATACCGTTGTGGCACATATCATCCTCAAAATGCCAGTAGAACTGGATGGGCAGGAGGCCCATATGCTTTGAACTAAAGCTGAATCTTTACTTGCAAACAAAATCAGACAAGTGGATCAAAGTATGCGATTTGCTAGTAAATGCATATCAAGTTATGGCCCGCTGCATTTGGTCTTTTGGAAGCATTCATCCAATTCAGATCAAATATTTTGATCAATTTGAAAGCCTATATGGCAAAACTTTAGCTGTTATAGAAAGGCAGAAAAACATGAAACAGATGCAGGGTTTGGAACGTGATCTATTTCATATCCACAGAGTTTGAGTGAGCCGAAGAGATCTCTCAAAGAATACCTGGTTCTAATTGCACCATCGGTCCCTCCAACCACGTTGCAGGTAACATTATGAAACGAGGGTCTGTGTTCAGCATCCTAGTAAAATCAAACTCTATTAGGAGAATTATGACTAAGTTTCTTATTTATTATGAGAGGGCTGATGGGTATCAAAGTACGGGAATTCATGGAACAACCCAGAACAGTGAAACATATTGTTTTGAAGGTTATTTGGTTTTCTGACTCAAAAGTGATGTTCAAAATATTCTTGCCAGGAAGCAAAAGTAAAGAGGGTTTTAATTTTTTGGCTCTCCTTCCAAAAATCGATTCAAAGAGTGGGAACCTGGTTTCCAGCCCATGCCCCTTTGTGGGAAAAAAAAAATTCATAAACCAA
>VvCYP724A1  (1500 bp)
TGCAATCATTTTTATTATACCATTAGGATTTCTAATAATCCATCCTGATACACTTTTATTAAGTAAATAACAAAGTTGTGACTTTTAAATTCTCTCTGTTTAATTTATAAAAGTTAGATTCACCTACAAAGAAAAAAGAATAAAAAAACTTGAAAAAAAATCATGTCTATTTGGCTTTTCCTTTTTTCTTTTCAATCCTATAATAATTATAATAAGGTATTAAAGATGGGATGAGAGTAAATCCCCATAGTTTGAAAATTAAAGAAATTAAAGATTTCTAATTATATACATACATACATATATATATATATAACAAATTTAAAGTTAGATTCACCTACAAAGAAAAAAGAAAAAAAAAACTTGAAAAAAAATCATGTCTATTTGGCTTTTCCTTTTTTCTTTTCAATCCTATAATAATTATAATAAGGTATTAAAGATGGGATGAGAGTAAATCCCCATAGTTTGAAAATTAAAGAAATTAAAGGTTTCTAATTATATACATACATATATATGTATATGGATATTCTTCAAATATGACTATAGAATGGGATATCATTCTCTCATAAATATATTCCTAAACAAACAAATTTTTGTCCTTAGCCTTTTTTGTTTCAAGACAAGATTAAAAGAAGGGAAATTAAATTGAAAATATTACATTCTTCATTTGAGTTAAAAAATTTGGTAGTTAAGAGAGAGGGAATGAGAAATATACCGAAAGTATGTTCTTTCATAGATTTGGCCTGTTATATGGCCAAATGAATTGAAGGAGCGGGCAGTAAAAATGGTAACTGTGATTTATTGAAAGCAAAGTGCTAATGAAAAATATTATTAAAATTGATAATATTAGTGGGTGCATTCCAATGTTACTGATCAAAACAGCCAACTAAGTACCACACAAAGCCATAAATTCCCACAAGTCATCATTGCCTTACATGGTAATGGAGCCATGAAGACACGGCCAATTGAAGTCAAGTGAGGGCCAAAAAGGAGGAAAATAAATGTTTTCGTCATGAATTCTGAAGATTATTTTAATCAACATCGAATGGCATATATAGTCACTTTTTTAATTAAAATTTGGGATTGTTTTTCAATCTCCATTTCTGAGATAAGACCACACCCTGTGTAAAAAGAAATCAAAAAGGCAAGAGGGCAATTAATTGAAAAGATATCAGTCCTTATCTCTTATATTTTTATTTAGAAACGATTGGAGAAGAGAATCTGAGCCTTATATCATTAGATTTGGTCAAGGACATATATAATAAGCAAAGTTGCAGACCAAGAAGTGAGCAGTGGATGGTGGGTACACTAGTCAACCTTGTGGGTTTGGTCTCCTCTTCTCAAGAACTCCCTTGGTAGCAACTAGCAAGTGGGTTCAAATTGATCACCATGGTTGAGTTGGGGGCCTTGCCAACAGTATTGGCTCTATTTCTAGGACTAGTTTTGGCTTTTCTTGTGAAATTCTTCTTTTCCAGAGAGCATACGAACTTACCTCATGGGAAA
>VvCYP85A1c  (1500 bp)
GGAGACTGTGGTAGGACAACCCAATAAATGGGATTTGAAAAATTTTCCATACCTGTTACAGAAAAATTAAAGAAAATTATATTCATACTAAACCATTCATTCTTAAAAATATATACATATATATCTATACAGAGGATAAACATCAAGAATGATCAGTGATTTTCAGGGTAAAATTACTAGAAACCTAAAAGGAACTGCACTTTTTGAACATCTCTGTATTAATTGGCCTGTGTTCACTATGAAATCTAGGCACTCAAAGCCAAAGAAAAAACAAAAATTGAGTTTAATTTTTACAAGCTCTTATTAGTATCAATGAATCAAAATAGAAAGAGAGAAATAAGTCACTTGGGATTAATGAGTACTTGTGAGTTCTCAAAAGGGGGTTTTACTAGGCCACCACCTATAAATGAATAGGGTGCCCTAAAAATACCATCTGTTCCTTTGAGCTAAAACAGCATAAACCATGAAAACCACTTGAAAAGTGGTAAGCACCTATCATAAGGGAGCACAAACCAGAAACTGGTGACCCTGAAAGCAGCAAAAGGAGGAAGAAAGAAACAGGGTAAAACCCAGTAAGATCCGTCTGAAAGTGAAGAAACTAAAGAAAACAAGAATCACCTTGCTCTCTGGTTTTTCATGAAGCTTGGGCCTTGCTTAAGAAACTCAGTGGTCTCCCCAAAGACTGGCCAACCCATTGTACCTGGGGGCAATCCTTTCTTCCTGTACCTCACCTCATTCCATCTCAACAAAGCAGTGCAAATACAGAGCCCAATAAGAACCACACCAAAAACCGCCATGAAAACAGCCATTGATGCTCCCAAGAAGCTCCAACCAGTGATCAGAGAGAGCTGTAAATGGTATGGGCTTGCTCTAGTTTAAGTCAGTCAGAAGTGTATATATAGACCTGAGGACTACCATATGTGCAGAGGGTGTGAGGCCACATAGGCCAAACCATGCAAGGTGCCCCCTACTAGGGAGGGACCCTCTCTCAGACCCCCAGAGCCCACCCCACCCCCCTCAAGTAATAGAAGCACCCTCACCCAAAATCTCAACTTTTCTTCTCAATTTTTAACTATTTCTCCACCCGGTTTGGAAATATCAGACTATGAAAATCTTTTGCCTTGAAAATAAAATGACATGTAATTTTCAATTTTGTACAAAATTAGAATTTTCATTAAATTATTTGAGTATTCAGTATTTTAATTTTTGGGTTTTTTTTTTAAACTGAACCCAAAAGATAAATTTTGGTAACATATAAAAATACACAACAATTTAAATTGATCATATGATTAAAAAATTTCATGTCTATTACATGTAGGTTTAATTGATCATTTATTGCCATATGTGTCCCCTTCTTCCCTGGTTTTAGTAGAAAGAAGAGAAGAAAAGAAGCCAAGGAAAGGGGGCACATGGTGAGCAGGGGATTGGAGCTAAAAAGAAAAGGGAATTTCCCCGAGGCAGAGTCCTTCACATGTCTGGCAACAAGATCTGCTTATGGAA
>VvCYP87A2a  (1500 bp)
GTGACCTACCTATATTGTGGTAGTTGTTGCATGGGGCTGAGTCCGTGGCTCAATGGGCCGGTGGAGCGGTGCTCTATGTATGAAAATGGGTTAACCTGATCTATTGGCTTAGCTTACCTACCATAATATACAGTAGTTGCATGCATATCCAGAACACCCATTTGAAATTGCCAATGAAGTCACAGGATTGAGAATTGGACTTGAGATTGTGATTACAGCTAAGGAAGATCTAAGAAGGAGATCTATCTCTAAAAAAAATGAAAGAAGAAAAAGAAAACACGAACATGTGTGGCATCTCCAATGGCATCAACATCACATAGATACTAGAGTATTTAGCTTAGATATTCAGAAGATCTCAATAAGTTGGCAAAGCCCATTAGATTCTAGTAATTTAATGATCCATTGAAGATTGGTTCTGATACTTAATTTCATCACACAGATCTTTTGAATCTCTATCTTCTGAAATCTAGGGAAGAGGCATCAAGTTTCTGCAAAATCTCCTTAAAAAGGGCCACATTTCTGCCTCGTGCTTCTTCAGATTTGTGATTTATGCACTCTTAGTCTTAATTATCCACATACAGAGATAGGTAGATACACGGAGGAGGGAGAGAGAGAGAGAGGAAACATCTTGTAAGCTTCACAGTTATGCTAGGCTTTTACACAAATTTTTATAAATGCCGTTGACAAAGGGATAATGAGTGGTCTATAGACAAATTATTCTACTATTTCGACTTTATCTCCAACCACTTGTACAGCTTCTTGAGCAACCAATTTCTTCAATAAAAAAACAGAGAAAAGAACAGAGCCAACTTAATATCTAAATTCTAGCTTGCCTATTTAAGTAGTTCTCCTCATGGTTTCTAAGATACATGCCAGCATTTTCCTTCTTCTTCTTGTCTTCTCTTTCCACATTCCAACCTCAACCCTTCCATTTCTTGTAATCTCAATCTGTATGTTTCTGTCTCTTTGTAATTCCACTTTTGCATTATAGTTCTCCCTTCCATTCAAGATCTTCTTTGTCCTTTTTCTATACTAGAGTAAGATGTGGCCAATTGCTTTGTGCATTGGAACTTTTGTTATTATAAGGATTATACATTGGGGTTACAGCTGGAGGAATCCCAAATGCAATGGGAAACTTCCACCAGGTTCAATGGGCTTGCCATTACTTGGTGAGACCCTTCAGTTCTTCGCCCCCAACACTTCTTCTGATATTCCTCCCTTCATTAAAGAGAGGATGGAAAGGTAAAATAGTGATAACTAACAAGTCTTGTTTTTCAAAGATTAGTGCAATCTTCTTCTTAAAGGTATTCTCTGCTATCACATTTCAGGTATGGGCCTATATTTCGAACCAATTTGGTGGGACGGCCAGTTGTTGTATCAACAGACCCAGATCTTAACTATTTCATCTTTCAACAAGAAGGACAATTGTTCCAGAGCTGGTATCCAGATACATTCACAGAGATCTTTGGGCGACAGAATGTGGGTTCCTTACATGGGTTT
>VvCYP87A2e  (1500 bp)
TGAACCTGGAGGGAGTTTGCCATTGCATTTAGGATTCCTCCATTTGTAAACCCAGTGAGTTATGCTTGCTATAAACAAGCTTACAACACAAAGCCAAACAGACCAGTACATGATCTTAATTAAGTTATAATTGGAATAGAAAGTACGTAAAAAAGAGGATGGGGGCTTTGTGATTGTCACTGACTCGCTGAGAAGTAGGATCATTTCTCTACCGAATGATTCCAATGTTATTTATTATCAGCCAAAGTGTTAGGAGAGGACTGCCACTCACCATGACTTGGATAAATGAATGCTCCTACTGTCATAAAAGAAGATAATGGCATCATGTCTGAAGATCAGTTATCCATCTGCATCCATAGTAAGTAATTGATAGTGCCATTTTAATAAATTCTTTGAATCCCGGGTGAGACTGGATTGTGAAGGAAAACTCCATCACTAAAATCTTGAAGCTATCAAGCCTCGTACCCCAAATTAGACTAAGATAGTGTTTATTTTTTTACTAAATAGAAAAAATCATCAGCTAAAAATAATATGTTGATATCATCTAATATAACAAAATTGAACATATTGATAACAAGTTCATTTTAATTATGTTAGTTAATATCAATATATTACTTTTAACTTAATAAAAAAAATCATAAAACAAACACCCCTTAAATCCCAAGATCCAAGTCATTGGATAAATCACTCAAAATAGCTCTAATATTCAAAACTTTTACCCATTCTTAGTTTGCTAATATTTTCATCACATAATGAATATTAAAGCAAAGTAGAAAATCACGCGTATGTAATTGTCCACCACACATTTCCACCAGTTTTAACGTCAATAGTAATTAAAAGGATAAATAAATGGTATGTCTTTTTATATAATTTGACTTTTCTAGAGGATGTTGACCATACATAGAGATTTTTTTAGGCATTCTCGTGCACTTTAATGCTAAGAAGATTATATTAATTAAAAATGTCACATACTTATCCTTGTAATGAAATCTTCATCTTAATTTGTAGTAGAAGATCATTCTAGCATTCCAATTGTATAATCATATCCTCTCAACAGTTCATATCATTCATTATTCTATCGGTATTCATAATAATGACTTGCTGACCTAAAGCCTAGCATAAGTCTAATCCAAAATTTTCAAGTCTTATCTAAGCTTTAAGCTCAAATCATTATTATGATAGCAACAATTCATATCATTCATTATTCTATTGGTATTCATGATAATGACTTGCTGACCTAAAGCCTAGCATAAGTCTAATCCAAAATTTAAAGCATAGCATAAGTCTAATCCAAAAAATTTCAAGTTTTATCTAAGCTTTAAGCTCAAATCATTATTATGATAGCAACAATTCATATCATTCATTATTCTATCGGTATTCATGATAATGACTTGCTGACCTGAAGCCTAGCATAAGTCTAATCCAAAACTTTCAAGTCTTATCTAAGTTTTAAGCTCAAATCAACCTACAAGTTGATCCAAGATTGGCCTTAGAATTAAA
>VvCYP704A2  (1500 bp)
TCTGTCATAGTTTATTAGCTGCTCAATTGCTGCCCCTACTAGTGGCCACGTTTTGGGGCCTTTTGTATGCCTCTGACTCCACCTATGGATGGCAATCCACGTCAAGACAGTGCAAGCTAGCATCAATATCCCCATGTTGTATCCAGCTGTTCCAATGCTCCTCTCTTCTTCCATTTCAGGTGACTGAAAAATGAAGGAAACCAAAATTAAATTTGTTGACGGGAGACACTTTGTGGGGTATATCTTATAAAGAATAGTCAAAATGAGGTGGTTGAGATGTTGATAAGTGGTGAAGCTGATGAACTAGCTACATTTGTCAACAATCTTTGCATGCTGTAAGATTAAAAAATACTTCAGCTCTTTTGTGCCCTTTACCTAATCTAACTATTTTGACATGTACCTCAGCACTCCTGCTGAGTTTCATTCCCGCATGAGACTCATTCAAAGCATCAAGATAATAGACTCAAAAGTCTCTAACTTATTCCAGTACGTTTCACCTTCCTAGCGGCTACTGCGGCGATAAATTAATTAGATGAATAATCCATTACGTCCAAAATGTCCTCTTCATTGTAGCTGCATTTCAACCTATGCATGCATGGGCCACACTTTTAGGCACATCACCCAAATCTCTATCTTTAATTCTCCACACATGCATCGCCTTTTGACCAGAGGGTATCATATGTGATGAGTAGCATCTTTTAGTCAAGGCCAATAAATATCTTGATATTTTGTAATATCCCATTACGAATAAAGGAGAAAGTGTTTAATGCTATATATGTATGAACTATTTTTAATTTTATAGACGTATTTTAATATCATAAGTCCTATTGAATCCAAAGCGGATAATGTCTGCACGGTTGGATAGGAGAGTTTAATTTTATAGTGTAATTTTATAGACGTATTTTAATATCGTAAGTCCTTTTGAATCCAAAATGGAAAATGTCTACACAGTTGGATAGAGATCGTTATAAATGGTATTAGCTCCATAAGGGGTATTTGTTAGTTCAGCCCCACAATCCCCATGGGATACAACGAGGATATTGTATTTACACTGGGAAGGTCGGGTCTAGAGAGCCCTTTTGGTCCAATGGTACATGAATATATTCCTTCTCTAGGAAGAAATCAACAGTTTAACATATTCCCAGAACATACTTGCAAAATAATATATGTATAAGAGAAAGTTTTTAATGCTATATATGTATAAACTCTTTTTAATTTTATAGTTGTATTTTAATATCATAAGTCCTTTTGAATCCAAAGCAGATAATGTTTGCACGATTGGATAGGAGAGTTTAATTTTATAAACATATTTTAATTTTAAATGGTATTAGTTTCATAAGGGGTATTTGTTAGTTTAGCCCCACAATCCTCATGGGATACAACGAGGATGTTGTATTTACACTGTGAAGATCCTTTGGAGTCTAGAGAGCCCTTTTGGTCCAATGGTATATGAATATCTTCCTTCTCTAGGAAGAAATCAACAGTTTAACATATTCCCCA
>VvCYP704A1b  (1500 bp)
CTTGGACGTTGATGAAAGAAGGAGCTGCAAGATATGCATGGGTAGAAAAATGGATTGCTTTTGGATCTTGGAAGAGTGGCCGTGTGTTACTTGGAACTTCTTTTTGTTCTTTTTGTATTAAAAAAATTATTATATCAAACTAACGTTCAAAGTAGTCTCCTTGGTATCACATAGGAGTATGTCATAAAAATATATATTTTTTCAAAATTTCAATAAAAGCTTCAATTGATAATTGAGATTTCATTTTTGAATTGAAATTATATTTATCAAGTGAAACTTCAATTTTTGAACTAAAATCGTAATTGTCAATTGAAACTTTATTTTTTATCTGAAGCCTCAATTGACTGAGGCTTTAGTTAATTTTTTTTTTCTTTTAAAATTTAATTAAAAACTATTAAATTATAATTTATTATTGACATTAAAAATCTATGTTTTAGTAATAAATTATTCATATTTAAGCTTAAGAATCTAGTATTACTTCAACAAACATAAATTGATAAATAGAATATATTATAAATGAATATTCTATTTATTAATAAATTAATAATTTTAAAATAATAAATTTATATAACATATAAATAAGATATACAATTGTATAATTTATTAATTTAAGATATTTAATTTGTTATTTTTTAAGATATTAATTTATTTGTATTATGATAAATTTATCTTTATCGAAATGATAGTATACTCCTAAACGGTAGTTGTCAACTGAGACTTCAGTTAATATATATATTTTTTTTACTTTCAAATTGAATTAAAAATTATTAAATTACAACTTATTATTGAAATTAAAAATATATACTTTAATAATAAATTATTTATATTTAAACTTAAAAATATAGTATTACTTCAATAAACATAAATTGATAAACATAATACAATAAATGAATATTTTATTTATCAATAAATTAATAATCTTAAAATAATAAAATTATATGACATACAAATAAAATATAAAATTTTATAATATATTAATTTAAGATATTTAATTTGTTGTTTTTTAAGATATTAATTTATTTGTATTATGAAAAATTTATCTTTATTGAAATAGTGGTATACTCTTAAGTTTCTATATATTGATTTTTTTTAACAAAATTAGTTAATGAAAATTAGTTAGAAAAAGTTTACTACAAAATATAATTTTTAGCAGTTTCATCAAAGTCACAAAAAATACACACTAAACATTTATATGTTGGAAAAAAAAAAATACATATACAACCTCATATGCCTCTACAAGAAGAGAACCTATGGATAAATTTGACATAATATAAATAAATTAATATCTTAAAAAAACAATAAATTAAATATCTTAAATTAATAAATTATACAATTTTATATCTTATTTATATGTTATATAAATTTATTATTTTAACATTATTAATTTATTAATAAATAAAATATTAATTTATAATATCTTTTATTTATCTATTTATGTTTGTTAAAGTAATACTAGATTCTTAAGCTTAACTAAAAATAATTTATTATTAAAATATATAT
>VvCYP704A1e  (1500 bp)
GGGGGGTGTTTGTGATGTCCCACATCGGATAGGGGAGAATGTTCCTGGCGCTATATATGTAGAGGCTCCTCTTAACCAAGTAGACGCGTTTTAAAACCGTGAGGGCCCCCTTTGGGCCCAAAGCGGACAATATCTACATGGTTGGGAGCGGGTCGTTACAAATGGTATCAGAGCCGATCCCCGACCCCGGTGTGGGGGTTTGTTTGGCTTTGTCTGTTTGGCCCCGCAATCCCATGGGACACAACGAGGACGTTGTGTCTGCATGGGGGGGTGTTTGTGATGTCCCACATCGGATAGGGGAGAATGTTCCTGGCGCTATATATGTAGAGGCTCCTCTTAACCAAGTAGACGCGTTTTAAAGCCGTGAGGGCCCCCTTGGGCCCAAAGCGGACAATATCTACATGGTTGGGTGCGGGTCGTTACAATACCTCTCATAATATATTTTCTGTGAACCCATCCATTACCACATCATGGTTTGCCTTAGGGGAAGATATATACTTCAACAACATAAACCTTGGTTATGGTGACTCTTCATCTCAATGAGACTAAGGTCAAGTTGCAACACCTGTAACAGAAGAAACAGGCCTGCTGTACTAGTTGTAACTTAAATATTTGAAACTTAGACTTCACTTTAAACCACAGGGTTCCATGACTGCATGTGTCATGGCTGGAGCTCATTGTCATGGGAGTTCTATTATCGTTGTTCACAGAACCATGTTCCATTTGACTTTTCGTTTATTTACTGGAAACTTGTTGCTGTCAGGTAATCTGTAGCAAAATATGTCATTGCTGGATCCTGAACTATAGTTCATGAGTTCATTGGTAGTGGAAGTTTTCTTCATGATGCTTCATTTGTTCTCTGTGAATCTGTCTGCCCATGTATGTCAAGAAACAAAGCATCTCATGCTACTAAAGGTCGGTGCATCCAGTATATTTTAATGCTGTGGTACCCTTTGCCATTGTGGATCTTATCTTGTCCTCAATATGCTTTATTCATTAAAGTGGAAGTATATGAAAAAGCATGAGGCAAGACATGTTATCCTGTCTGTGTATTCCCCCTAGATGTGTACCATCCTGATTGGAGATGGGTTTAATATTTCATGCATGAGCTCTTCTAATATATGACGAATCATTTCCATTAGTTTCACTACAAGGATACTAGAGGCAATATATTCATGGTCCAAATAAATAAGACAAGGAGCTGTGAAAAATATTATTGATGAATCTGTCAATCATCATCAACACAGTATATTTTTAGGTAGAATTAGTGAAGGGTTCACATCTATGATCAGTATTAAATTTCATAATTAGACAATCCCAAGGATTGAGATCTCAATTACGAATGATCCCAATGAAAGCTTAAATTATGAGACTTTCCTTTTCTCTCAAATAAAATTCAACAAGTTATTACCAAGCATATTAACGTTCTGAATTCATTAATCATAAAAAAAATTCTCATTTATAGTTTTCTTTGGTATTCTTCTTCCAACATTGTCCAGA
>VvCYP94C1b  (1500 bp)
TGATGGATTCAGGTGCATAAATTGAAAAAGGGAAAAAACACATGTATTATGAAGACGAAGTTTATTAGAAAGAGGAGATATGGAGAGAGACCAATGAGATTTGAGAGAGAGGAGAGAGCATTTCAACTCTTTTATCTTTTGATGCTGATCACTGCCTTTTTTTTTCTCCCTTATGCTTCCACTAAGAAAAGAAAAAGATTAACAGAACCCCAAAATAAAAAATAAAAAAAGAAAAGAAAAACAATGGAGAATGGAGAACATGTTTGGAAAAGAACAAGGTTAAAAAACTCATCGTGTGCGTCACCATTCGAGATTGGGGAAGTTTGAACCACGTGTTATTATTCTTATCCGTACCCACTGTTGTTGGTAAACAAGCAGCACGCTCAGCTGAGTGGTGGGCTTCGATGAAGCTTACATTTTTGTCATGTGCTTTGGCTAATTTTTAGTTTACTCCTATCCGAAATTTTCTTTTAGATTATATTATCCATCATCGATAAGAGTAGAGTAGTAACATTCATATTCCATTTTCTAATACTAAATTATAAAGTCCATATTTCGTGCTTGTCTAGATTAGTACCTTTCTGATTAAGTTAAACATTTAAGAGGGGAAAAAGACAACTCAAAATAATTAAGAATCAGATCTTTTCTTCTAGCTTAATAGAGGTCTTTCTCTATAGCCCAAAATTTAGTTTTGTGTTATATAGGATGATGCATCTTATTTTATTCAAGCTCTGAAATTAGTTAATTGCAATCGAATATTAATCCCAATGGTCCAAGCTCTGAAATTTTAGAATGTGCCTAGCTACAATTAACCATCTATTTCAAGTATTTTTGCGAACGTGAAACCTCAGAACTTGGTTCCCTTATATATACACAAGCCACAGCCTCAGAACTTGGTGAAACCTCTTCACCCAGGCTTTCTGATCCTTTCAACTAAGTGATTAGGTCCCCTTCCTGAGCTGAAGATACTTAGTTGAATTTTACAGGAATGCGCAATGCTAAATTGAATCATTAATAAAGAGACTAAAGGCACAAAATTTGCGAAGAAAAATGGAGCACAGCACAGTGGACCTCGCCCGTGGAACATGTGGATAACAAATTGGGTGGACTGCAGCAGTCCTGTGTCTCTTCCCACTTCTAAAAGTTTATATTCAAAATGATGGCAGATGACTTCACCGTTTTACCCTTTTTCTTTTGGAAATTGGTGATGATTCCTGAACAATCTATTAAGGACAGCCCGAGAAAACAACCATTTTCTTACAGTCATTTATTCTTAAATGACTGGATCTACTAGTTCGTGTGGCCCGATCCATTAAAAAAAGATACTCCAGCATAAAACACAAAAAGGAAATACTCAGGCATCGGGTTTCAAGGTAGCACCGTAGCACACACAATTTAATAAGAGGTCATATGCCACACGGTTTTAAGGAGGCTGGATGCTAAATCATATTGAATTGGGTAGAGGAATTTCAAACGGCACTTTTAATTGTTCATTGTGCC
>VvCYP96A1b  (1500 bp)
TAGAGCTGCACTTTGCTTAGAGCTAGGGTTTGTCAGCTCTACCATACCATATTTGTAGTGCATTGAGGACCCCTGCGGGGGGAGAAGCAATTATTATTGATTTTATTGGGTGATGCAGACGCTAACCGAACCATAATTACAACGCATTGGTTGGCTAATGGGAGGATGTGGTTGGATGTCTTCTGATCCCACGTCTGAATTGGTAACTATTTAGGCAACTACCCATCACCCAACACTGTTAGATTTTGAAGGATTTTAATTAAGGAAATATGATACAACTTGTACTACTGGCCATCAACCTATATAATTGAATCTGAATTGTTAATAAATGTACAAAGAAATGAAATCAAAGTCTAACAAAATAATATAAAAAATTGAGACCTACTCAAAAAAAAGAAGAGACAATTTACTTTTTGATACCATGAAAATAACCCATACATTTATACTTTGTCAATAATTTTCGACATCTAGATAGTTGAAGTTGTACAGAAACACAGAGATTAGGAGAAAAATTTTCAGTCATAAATATTTTTGCATGTGTTAATTCATATTCTTGATCACCTACCAACCGTGTTGGCTTCAGGGTAGGCATCATTGCCATTGTTAGTGTGGGACAAGTTTTCAGTCTTTCAGGCTAATGGTAGCTAGGAGATCAATTTGGCCTGCTGCTGTATCTATATAGACAGTATTCATATTTAAGATCATAGTAAGTATCAACCAAACCTCCAAACCTATAATTGTAAATGTCATAACCCCACTCCAGTAATATTTTAGAATTCTATTTGAATTCCACCATTTCCTCCTCTGGCACCACATTTAAAAAATAAAAAAAAAATCAAAATACATGTGTGGAATTGTACCATTCCTTCATCTTAATCCACGCTCACCAAAAATTCTAACCCTAATTTCACCTTTCTTCCCCATCATCCCTACCACCTTTTTTTCATTCTCCATTTTATTTTCTTAATTTCCTTTTGCACCCATTTAGCCCTAGTTGTTGTAATTGCTTGTGGCTATGACTATTCCTCTTCAGTCTTTTTGTTTTTACTTTTTTTTCCTTTTTGAATTTGAAATGAGGGAGAAGATGGAAATGAATGAAAGAAAATAAAATAAAGTGAGGAAAGAAAAAGGGTGATGGAAATTTAGAGTAGGTTTCAAATTTCATAACCACCCTTTTGTTGGTTTGTTTATCCTTTTTGCTCATGCTACACATTCCAATCAAATTTTTGTGTTAGCTTGGCATCCAATGTTGCTTTCACAAGTATCATCTTTTCTTTTATATCATTAAATATATTCAATAAATTTAAATGTATTTTCAAGTTGTCATACATATTGTTTTCTTCAATAAAATAACATATTAATATATGCTTTATTGCTTTTTCTTTTTTTCTTTTTAAGTTTTTTCAATATTTTTATGAGTTTTAAATAATTTCGATTCGACTTATATTTGTTATTTGATGTTTTTCAATATTTTTTTTATAAATAACTAACCATTGATATT
>VvCYP96A1d  (1500 bp)
ACGCTTTATTTTCCATGCACACACTTCCACATGTTTTTTTTTTCTTCTTTTTTTTTTTTTTTTTTTCCAACTCTCAGCCTCCACACATGCATGACGTGTTTGTTTGTTTGGTTTTTTCACGTCCAACATCTATGATTTATTTTCTTTTGGTTATTTTTATTGTTTACATCTACTCATTTAAATTTTGAGTCTTTTTATTATCTCCATTAATAAATTTACATATGTTCATATATTTCTAATAATTGAATTTTTTTTTTTATAAATCAAAGTATAATCTAAATTTCAAATATTCCAAAAATATATTTAAATTATTTAAAATTAATTAATGAATATAAAATATTAATTTAAAGCCTAAAATTTTATTGGAATAACAAAACCTTACACTTCCAATATTGCACTACCATTTCTGACCTCATCTAAAAGGATTTCTGCATAGAAAAGTTATAAAATTTACTTTATACCTAAGATTTATGATGTGAAAATAACTTTTTACATTCTTTTAGTTTATTTAAATTATTTCTTTATTTCCAATTTATAATCTTACCCCTAAAATTTCTATGGTTAAGGATATAAAAATAAAAAAATTATCTTATTTTGGGTCATATAAGAAGAGTAATTATGATAAAAATGTTTTAAACGGTATTTGTTTTTTTTAGTTTTTTATTGAAAGTAAATAACATATTAATTTTTCCTTACTTTTTAATATTTAATAGATATAAAATATTACAAAAATAAATAATCTAATACTTAATATTATTAAACCATATTTAGTTTTAATTTCTATTTAAAATTAAGTTTAAAAAAATAAACATTACGTACATTAATCTATAACACTTTTATAAATAAAACATTTCTATCATACACGCTTTTACATCCAGTGCATCACTTTAAGTAATGTTTTTTGAACTTTCTAAAAGTGTTTGAAAAAAATTAAATATTTGATAAAATTTAGGAAACACTTTTTATGTTAGAAAAGCTTCTTATAGTCACTGAAAAATGAGCTCTAAATTGAGATAAAGATGATTTCTAAAATTAATATTTATTTTTTATGGGATAAAATGAGAAGTAGAATATACGGGTCTCTTACATTTTGGAAAATAGTTTGGAAAAATCAGTTTTTGATAATAGCCATAAAAAATAGGGATCCATACCCTTCAAAAACAAAATTATGTTTGATAGCTCAAATATGAAAATATCTATATATATTCCCAAGTTTCTTAATTTCCAGTGCTGCTTGTGGTTGGTCTTCCTCGTTTAAATGATATCCCACCTACCAAGTACAGCCGATGGAATTAATTCCCCATAGACGACAAAATTCAAGCAATGCCAGTACTATAGCTGATGCTGATGCTGATGCTGAGGTCGCTGTAATTTCCTTTTCTTTTATCCCCTTCAATTCCTTGGTAAATACATGTTACCAGCGATCAGTGATTCATGTATGGATTCAACCATAAATAGAGCTCAAACTGAAAGCAATTCGGCAATTCATTTGGAACTGCA
>VvCYP97B3  (1500 bp)
TGCCCAACTCAGATTCCACACCCAGTAGTAGTGACCCAAAACATATATGATATATCCACTTGACGCATGCTCAAATCACAGCAGTTGTCTTTCACACCCATCACAGGCATACCAACACGATTGGATGTAAATACAAAAGAAAAAACATCTGGGACCCATAGATTGGAGGATGACGCAGGAATTCCACCGAGCCCTCCTCACCCAATCATTTCATGGCTTGTGTGTGAGACGCACCTAACCATTACCGAAGTGCTCTTCTTGTGGTTATGCCTACCTTTCTTTTCTCATTTTCTTTGAATTTTGTATGCAATTCCACTATGGGTCTTTCGATTGAGTCTAATAATAAAAATGGGTTATTTGGTCAGCTAGGCCAAAATAATAGTAAAATTGCAAGATTGACTTCCTTCTTAATTTTATTGAAAAATAATCTAATTTGGAGTCTTTTACCCTTTTGATTTGTTTCCCTCCAAAAACACATCTTTCTACTTATTTTATTAATTTCATTTTTTACCTACTCATATCTTTCAAACTTTTTTTTTTCTTTGCCACGATCCGAGCATACTCCCTCTCGCTACATGACTTCATCTATAAATGTGAGTTGAAACTTTCCTTCTTTCTCATTTCATGAACATTCATTATATTTTTAATTTACTTTATTTTGAAAAAATTCTTTGTCATTTCCTAATGCTCCATCCACTCTCTTATCTTCCAAATAACTTATTTTCATTTTTGTTCATATTCACCCAAACTACATTGCCTAAAAAAACAAAAATCATGTTCTCATTTTTTTTTTCATTATATTCATTTCACCTTATAATATTTTTCATTTTCACTTTTTTATTTTTTATTTTTCATTAAGGGTGTTCACCTTAATTATACGAAAGTTAAGTTTGATTTTTAAAAAAATAAGGTTAAATTGCAAACCCTAAATTCAAAAAAAAATATATAAACTAAAAATAATTGCAAATATTTCTAATAAAAAAACAATAGCAAAAACCCAACAAAAAATTACGGCAAAATTTGAGAATGACGATCTTGCAGAAGAAAGAAAGATAAAAGGATTTTTACAGTTAATTTTATTTCCTTAGTGAGTCTTTATCTCTTGAGGGGGCAAACTGTGAGAGAATGGGAGAGAGTTAGGAATTAGAATGGGAGTAAAATGAATTTGGAACGAGGGGTAATGTTTGTTGACATAAAGAAAGGGTAAAATTATAAAATAAAATAAAATAAAAAAATTGGTTTAGTTTTTAAAAAAAGATAAAAAGAAAGGATGTTATTTTTCAAATTTTAAGAATATTTCAAGTCTTTTAACCAAAATCTCAATAAAAATTCACTGGATATGTTGTCTTCCACAAAGTACTTAATAAAGAAAAAAAATATTTCTTCATATTTGATTTACTATCAAAATAATATATATTTAAAAAATAAATATAATTAAAATGAATTAAAATCTCAATAAAACTCAAATAAAATAATGCTATTAGGATTAGGAGAAATTAT
>VvCYP97C1  (1500 bp)
GTTTGTAATAATGGCTCTGGGTCTGGGGACCGAGAATTAGCCTTGGAAGACCTTACTGCTCTCTCCACCTCACTCTCTCAACAATCACCATAGCCACTGCTGCCGCCTGTATAGATTGGGTTTCTCAATGTGGCTTATAATTTTGCCCTTTGATTTTTGCTGCAATTTCAAGTCCTATTATCCCTACTTTTTCCTGAAATTTGCTTAATTTCTTTATCAGTTATAAATCACCTACTACAATCAATTTCATTCCCTACTGCCTTGGCTCGGTCCTTCACATGGAAAGCCTGATTCTCAAACCTTCTCTAATCACAAGTTTTCAGAATTGCATTTTATATTTGAAATTTGTTTTTTTTTTTTTCTATTGCAAAAGCTATCATAATATTATTTATTTGAACACACTAATTCAAACAAGTTTTTATAAAATATATTACATCTATCCGAAAGGTTAGTAATAATGGAAACCGACTCAAATGCTATTTTTAAGAAAATTGGAAGGTTATTGATACTTTCTTGATAGAAGATATTCTTAAAGGAGTTTTTTTATTATTATGCAGAATAATTGTTAGGAAGTGCCTTAAATTTTTAATCGGATATATCTTAAGTTGATATATTATTGTAATATTATATTTTTTTGTAAAATAAGGATAATTATTATAAATATCTTTATAAATATTATAAATTATAAAAAGAATAGGTCATGAGATAGAGATGAATTTGTTGAAACTATGAACCGAATAGACATATGAAGAAGAACGAGATATATTTAATGGAGTAAGAAGGTTTGTGGTTTAAGGTGTAAATACAAATGGTAGAGAAATATAAAATATTTTAGAAACTCAATAATTGTATTTGGTTTTATCCTTTATAAAATTATTTATGGTATAATGAGAATATTCTCTTTCATTCATGAATGTAAACATGGTTTGTCGAATTATGTTAAAACCTCGTATGTTATGTTGTGATTATTTTATCTTTTTTGTTCTTAATCTAACATTGTTTACATCAAAGCCTATGTTACCACAATAGTTAACAATATATCATTTGTATTTGAAAATAAATAAGATAAATCAAGTAGGTTAATTCCTCTTATTTAAATTGTCTCTCTAAATTCGTTGGTGTACATCTTGTTGGAGGAGTGCCATGATTTGCCTTTCCTGCAAGTCCTCTAAGCCACCAGGTCCCAGCTGAGACGAACCTTATCCGGGTCCAAGTCAGAGCTATGTAACGATTTTCGTGCATACCATGGGATCCACCCTTCCTGAGTCCTCCATCTCGGATTCACGCACCTTACCAGCTTAACGGACTGCTTTAGAATAAAATAGAAACCCTCAAATTCACATGCATTCATAGTCTGGCCGAAGATGAAATCATCTCTGTTGTTGAATTCAAATAACTTCATTTCAAGCAAAAGCAACAGGTTTTGTTAAATGAAAAGGAGAATGGAGCGATTTCTTTTCTATTAGACATTCATTATGGACAACCAGGTCATACTCATCA
